# Supplementary material for: Construction of Two Stable Co(II)-Based Hydrogen-Bonded Organic Frameworks as a Luminescent Probe for Recognition of Fe3+ and Cr2O72− in H2O
Source: MDPI journal article supplement (doi:10.3390/molecules26195955), 2021-09-30
Supplement: s1 [file s1]

# Construction of Two Stable Co(II)-Based Hydrogen-Bonded Organic Frameworks as a Luminescent Probe for Recognition of Fe<sup>3+</sup> and Cr<sub>2</sub>O<sub>7</sub><sup>2-</sup> in H<sub>2</sub>O

Qi-Ying Weng <sup>1</sup>, Ya-Li Zhao <sup>1,2</sup>, Jia-Ming Li <sup>1,\*</sup>, Miao Ouyang <sup>3,\*</sup>

<sup>1</sup> Guangxi Key Laboratory of Green Chemical New Materials and Safety Technology, College of Petroleum and Chemical Engineering, Beibu Gulf University, Qinzhou 535011, China; qy13977735754@163.com (Q.-Y.W.); jmli@bbgu.edu.cn (J.-M.L.)

<sup>2</sup> College of International Studies, Beibu Gulf University, Qinzhou 535011, China; ylzha@bbgu.edu.cn (Y.-L.Z)

<sup>3</sup> School of Chemical and Environmental Engineering, Hanshan Normal University, Chaozhou 521041, China; 442976264@qq.com (M.O)

\* Correspondence: jmli@bbgu.edu.cn (J.-M.L); 2557@hstc.edu.cn (M.O)

## Contents

Figure S1. IR spectra of compounds **1** (a) and **2** (b).. ..... 2

Figure S2. The simplified 2D HOFs for **2**.. .....2

Figure S3. (a) The 1D chain constructed by  $\pi\cdots\pi$  interactions in **2**. (b) The 1D chain constructed by C-H $\cdots\pi$  interactions in **2**.. .....3

Figure S4. The solid state excitation and emission spectra of **1** and **2** at room temperature.....3

Figure S5. TG curves of compounds **1** and **2**. .....4

Table S1. Crystal structure data for **1** and **2**<sup>a,b,c</sup>.....5

Table S2. Selected bond lengths/Å and bond angles/° for compounds **1** and **2**. .....6

Table S3. Selected bond lengths (Å) and angles (deg) for **1** and **2** with estimated standard deviations in parentheses. ....7

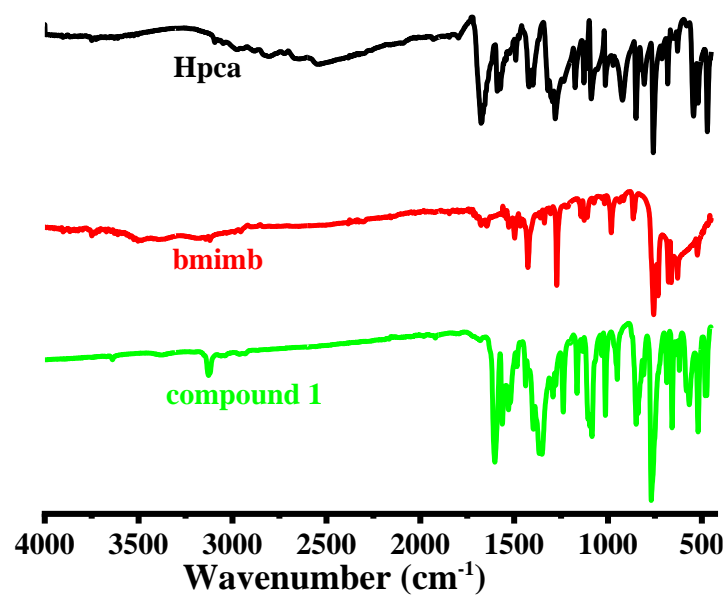

(a)

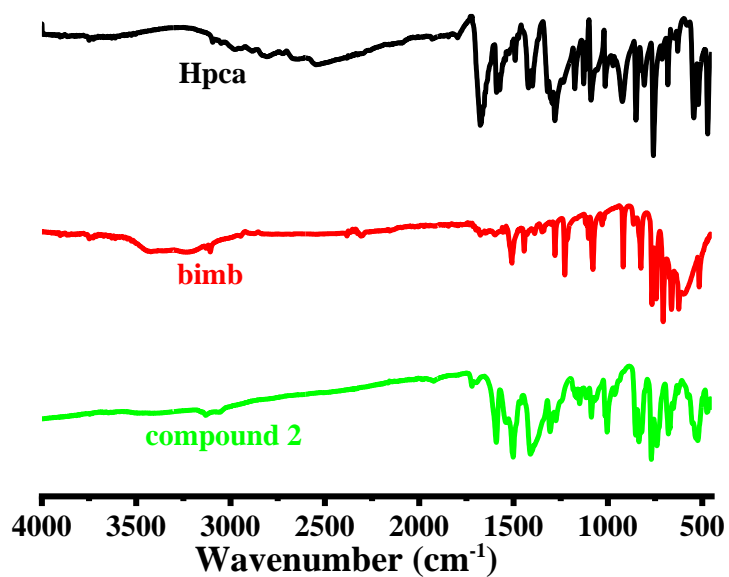

(b)

Figure S1. IR spectra of compounds 1 (a) and 2 (b).

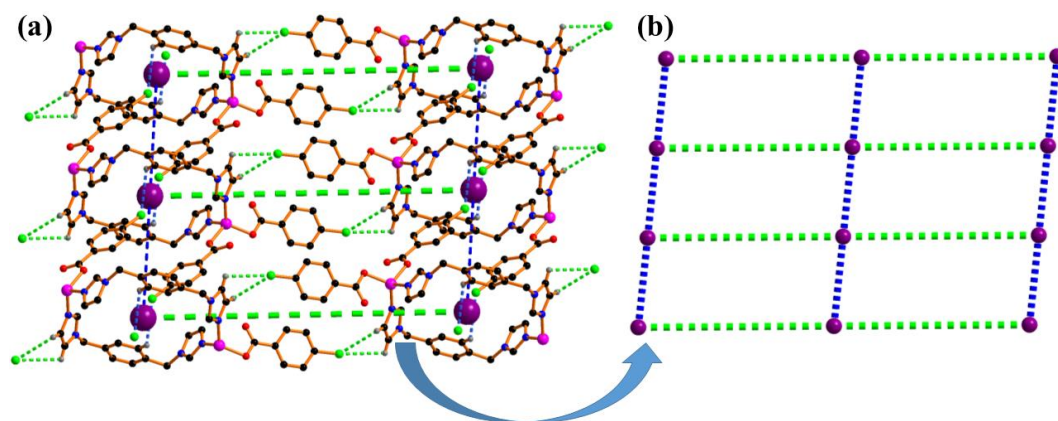

Figure S2. The simplified 2D HOFs for 2.

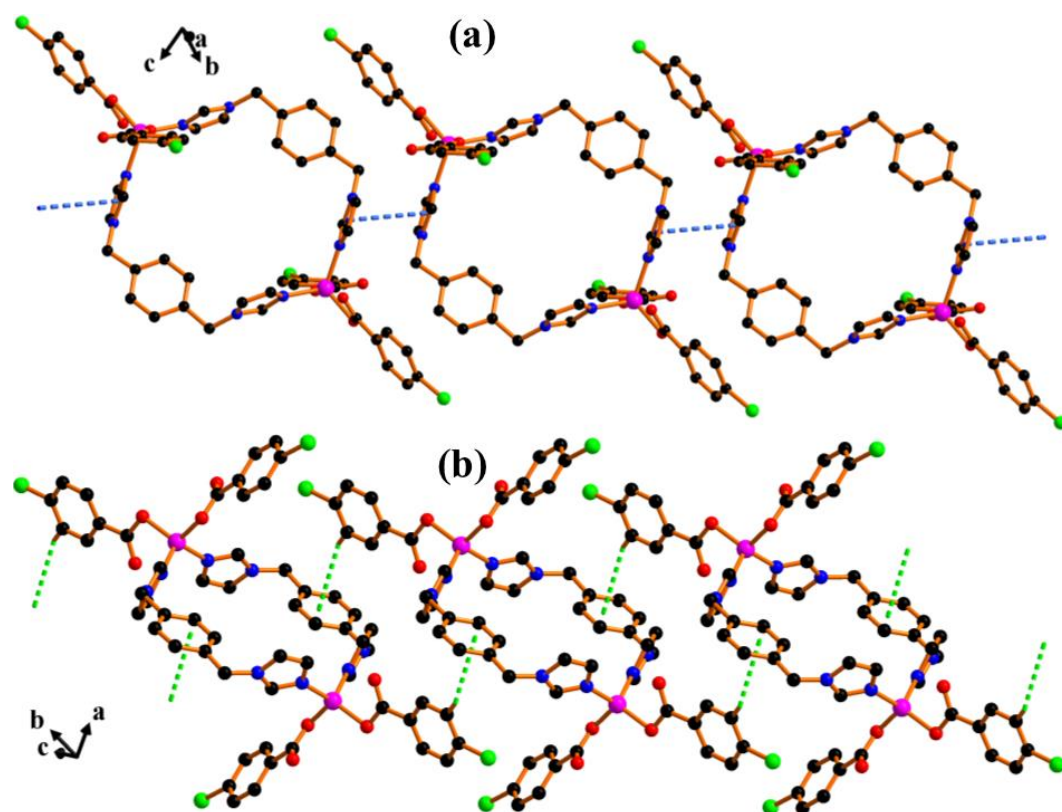

Figure S3. (a) The 1D chain constructed by  $\pi \cdots \pi$  interactions in 2. (b) The 1D chain constructed by C-H $\cdots$  $\pi$  interactions in 2.

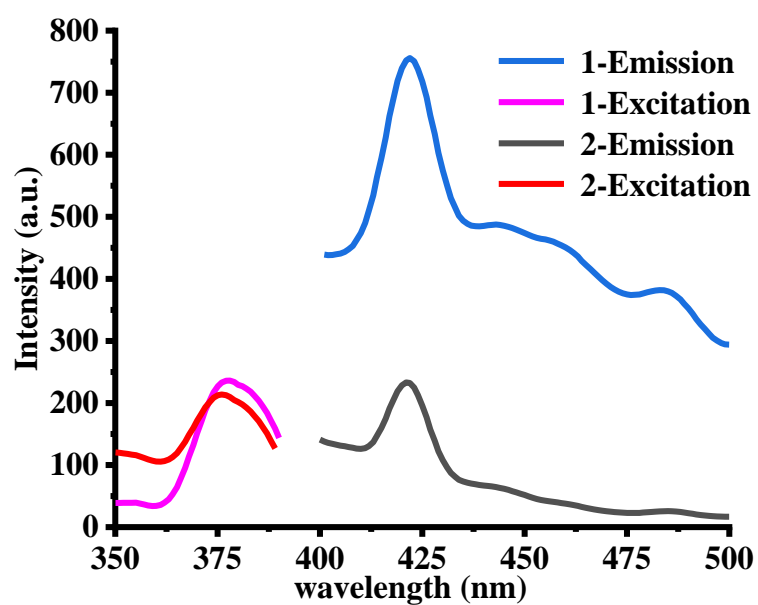

Figure S4. The solid state excitation and emission spectra of 1 and 2 at room temperature.

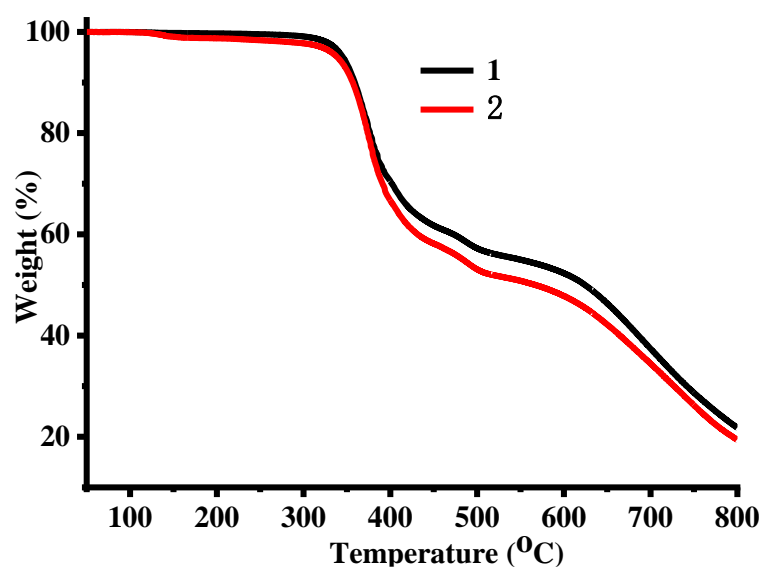

Figure S5. TG curves of compounds 1 and 2.

Table S1. Crystal structure data for **1** and **2**<sup>a,b,c</sup>.

| Compound                                                                                                       | <b>1</b>                                                                        | <b>2</b>                                                                                      |
|----------------------------------------------------------------------------------------------------------------|---------------------------------------------------------------------------------|-----------------------------------------------------------------------------------------------|
| Empirical formula                                                                                              | C <sub>30</sub> H <sub>26</sub> Cl <sub>2</sub> CoN <sub>4</sub> O <sub>4</sub> | C <sub>56</sub> H <sub>44</sub> Cl <sub>4</sub> Co <sub>2</sub> N <sub>8</sub> O <sub>8</sub> |
| Formula weight                                                                                                 | 636.38                                                                          | 1216.65                                                                                       |
| Crystal system                                                                                                 | hexagonal                                                                       | triclinic                                                                                     |
| Space group                                                                                                    | <i>P</i> 6 <sub>4</sub>                                                         | <i>P</i> -1                                                                                   |
| <i>a</i> , Å                                                                                                   | 14.0240(6)                                                                      | 10.0331(8)                                                                                    |
| <i>b</i> , Å                                                                                                   | 14.0240(6)                                                                      | 12.8050(11)                                                                                   |
| <i>c</i> , Å                                                                                                   | 12.6288(6)                                                                      | 13.1684(14)                                                                                   |
| $\alpha$ , deg                                                                                                 | 90                                                                              | 63.495(10)                                                                                    |
| $\beta$ , deg                                                                                                  | 90                                                                              | 80.368(8)                                                                                     |
| $\gamma$ , deg                                                                                                 | 120                                                                             | 67.362(8)                                                                                     |
| <i>V</i> , Å <sup>3</sup>                                                                                      | 2151.0(2)                                                                       | 1397.3(3)                                                                                     |
| <i>Z</i>                                                                                                       | 3                                                                               | 1                                                                                             |
| <i>D</i> <sub>calcd</sub> , g cm <sup>-3</sup>                                                                 | 1.474                                                                           | 1.446                                                                                         |
| $\mu$ (MoK $\alpha$ ), mm <sup>-1</sup>                                                                        | 0.828                                                                           | 0.846                                                                                         |
| <i>F</i> (000), e                                                                                              | 981                                                                             | 622                                                                                           |
| <i>hkl</i> range                                                                                               | -17→16, $\pm$ 17, $\pm$ 15                                                      | $\pm$ 11, $\pm$ 15, -13→15                                                                    |
| ((sin $\theta$ )/ $\lambda$ ) <sub>max</sub> , Å <sup>-1</sup>                                                 | 0.617                                                                           | 0.597                                                                                         |
| Refl. measured                                                                                                 | 15400                                                                           | 8706                                                                                          |
| Refl. unique                                                                                                   | 2827                                                                            | 4961                                                                                          |
| <i>R</i> <sub>int</sub>                                                                                        | 0.0525                                                                          | 0.0503                                                                                        |
| Param. refined                                                                                                 | 188                                                                             | 352                                                                                           |
| <i>R</i> <sub>1</sub> <sup>a</sup> / <i>wR</i> <sub>2</sub> <sup>b</sup> [ <i>I</i> > 2 $\sigma$ ( <i>I</i> )] | 0.0400/0.0697                                                                   | 0.0690/0.1252                                                                                 |
| <i>R</i> <sub>1</sub> <sup>a</sup> / <i>wR</i> <sub>2</sub> <sup>b</sup> (all data)                            | 0.0606/0.0799                                                                   | 0.1366/0.1671                                                                                 |
| GoF ( <i>F</i> <sup>2</sup> ) <sup>c</sup>                                                                     | 1.057                                                                           | 1.047                                                                                         |
| $\Delta\rho_{\text{fin}}$ (max/min), e Å <sup>-3</sup>                                                         | 0.25/-0.34                                                                      | 0.54/-0.59                                                                                    |

<sup>a</sup>  $R = \sum ||F_o| - |F_c|| / \sum |F_o|$ ; <sup>b</sup>  $wR = [\sum w(F_o^2 - F_c^2)^2 / \sum w(F_o^2)^2]^{1/2}$ ,  $w = [\sigma^2(F_o)^2 + (AP)^2 + BP]^{-1}$ , where  $P = (\text{Max}(F_o^2, 0) + 2F_c^2)/3$ ; <sup>c</sup> GoF =  $[\sum w(F_o^2 - F_c^2)^2 / (n_{\text{obs}} - n_{\text{param}})]^{1/2}$ .

**Table S2.** Selected bond lengths/Å and bond angles/° for compounds **1** and **2**.

|                                |             |                         |             |
|--------------------------------|-------------|-------------------------|-------------|
| Compound <b>1</b> <sup>a</sup> |             |                         |             |
| Co1-N1                         | 2.048 (4)   | Co1-N1 <sup>i</sup>     | 2.048 (4)   |
| Co1-O1                         | 1.948 (4)   | Co1-O1 <sup>i</sup>     | 1.948 (4)   |
| N1-Co1-N1 <sup>i</sup>         | 111.5 (2)   | O1-Co1-N1               | 117.81 (16) |
| O1-Co1-N1 <sup>i</sup>         | 92.58 (15)  | O1i-Co1-N1 <sup>i</sup> | 117.81 (16) |
| O1 <sup>i</sup> -Co1-N1        | 92.58 (15)  | O1-Co1-O1 <sup>i</sup>  | 126.0 (2)   |
| Compound <b>2</b> <sup>b</sup> |             |                         |             |
| Co1-O1                         | 1.978 (3)   | Co1-O3                  | 1.961 (3)   |
| Co1-N1                         | 2.013 (4)   | Co1-N4 <sup>i</sup>     | 2.028 (5)   |
| O1-Co1-N1                      | 111.84 (16) | O1-Co1-N4 <sup>i</sup>  | 116.81 (16) |
| O3-Co1-O1                      | 110.89 (15) | O3-Co1-N1               | 95.96 (16)  |
| O3-Co1-N4 <sup>i</sup>         | 105.53 (17) | N1-Co1-N4 <sup>i</sup>  | 113.56 (17) |

<sup>a</sup>Symmetry codes: i  $-x+2, -y+1, z$ ; ii  $-x+1, -y+1, z$ .<sup>b</sup>Symmetry codes: i  $-x+1, -y, -z+1$ .

**Table S3.** Selected bond lengths (Å) and angles (deg) for **1** and **2** with estimated standard deviations in parentheses.

| D-H...A                        | d(D-H) | d(H...A) | d(D...A)  | ∠(DHA) |
|--------------------------------|--------|----------|-----------|--------|
| Compound <b>1</b> <sup>a</sup> |        |          |           |        |
| C16-H16...O2 <sup>iii</sup>    | 0.93   | 2.95     | 3.728 (8) | 142    |
| C16-H16...O2 <sup>iv</sup>     | 0.93   | 2.95     | 3.728 (8) | 142    |
| C15-H15...N1 <sup>v</sup>      | 0.93   | 2.89     | 3.682 (7) | 144    |
| C15-H15...N1 <sup>vi</sup>     | 0.93   | 2.89     | 3.682 (7) | 144    |
| C4-H4...Cl1 <sup>vii</sup>     | 0.93   | 2.95     | 3.743 (6) | 144    |
| C8-H8A...Cl1 <sup>viii</sup>   | 0.96   | 2.84     | 3.676 (7) | 147    |
| Compound <b>2</b> <sup>b</sup> |        |          |           |        |
| C15-H15...O1 <sup>ii</sup>     | 0.93   | 2.47     | 3.261 (6) | 142    |
| C17-H17...O2 <sup>iii</sup>    | 0.93   | 2.51     | 3.417 (7) | 165    |
| C18-H18B...O1 <sup>ii</sup>    | 0.97   | 2.60     | 3.491 (7) | 152    |
| C23-H23...O1 <sup>iv</sup>     | 0.93   | 2.91     | 3.798 (6) | 161    |
| C25-H25A...O4 <sup>iv</sup>    | 0.97   | 2.65     | 3.539 (7) | 153    |
| C27-H27...O4 <sup>iv</sup>     | 0.93   | 2.79     | 3.425 (8) | 126    |
| C27-H27...Cl1 <sup>v</sup>     | 0.93   | 3.175    | 3.522 (6) | 104    |
| C28-H28...Cl1 <sup>v</sup>     | 0.93   | 3.125    | 3.511 (6) | 107    |
| C20-H20...Cl2 <sup>vi</sup>    | 0.93   | 3.308    | 3.884 (6) | 122    |

<sup>a</sup>Symmetry codes: iii  $-y+1, x-y, z-2/3$ ; iv  $y, -x+y+1, z-2/3$ ; v  $-y+1, x-y, z+1/3$ ; vi  $y, -x+y+1, z+1/3$ ; vii  $-x+2, -y+2, z$ ; viii  $-x+y+1, -x+2, z-1/3$ .

<sup>b</sup>Symmetry codes: ii  $-x+1, -y+1, -z+1$ ; iii  $-x, -y+1, -z+1$ ; iv  $x, y-1, z+1$ ; v  $x+1, y-2, z+1$ ; vi  $x-1, y, z$ .
