# Supplementary material for: Construction of Two Stable Co(II)-Based Hydrogen-Bonded Organic Frameworks as a Luminescent Probe for Recognition of Fe3+ and Cr2O72− in H2O
Source: Molecules. 2021 Sep 30;26(19):5955. doi: 10.3390/molecules26195955 (PMC8513017; doi:10.3390/molecules26195955)
Supplement: Supplementary file 1 [file molecules-26-05955-s001.zip]

Archive with 5 entries (5 files):
- 1.cif
- 1-checkcif.pdf
- 2.cif
- 2-checkcif.pdf
- molecules-supplementary.pdf
