# Supplementary material for: Construction of Two Stable Co(II)-Based Hydrogen-Bonded Organic Frameworks as a Luminescent Probe for Recognition of Fe3+ and Cr2O72− in H2O
Source: Molecules. 2021 Sep 30;26(19):5955. doi: 10.3390/molecules26195955 (PMC8513017; doi:10.3390/molecules26195955)
Supplement: Supplementary file 1 [file molecules-26-05955-s001.zip › 1.cif]

data_lfx34
_audit_creation_date               2018-04-11
_audit_creation_method
;
Olex2 1.2
(compiled 2018.04.03 svn.r3497 for OlexSys, GUI svn.r5486)
;
_shelx_SHELXL_version_number       '2018/1'
_audit_contact_author_address      ?
_audit_contact_author_email        ?
_audit_contact_author_name         ''
_audit_contact_author_phone        ?
_publ_contact_author_id_orcid      ?
_publ_section_references
;
Dolomanov, O.V., Bourhis, L.J., Gildea, R.J, Howard, J.A.K. & Puschmann, H.
 (2009), J. Appl. Cryst. 42, 339-341.

Sheldrick, G.M. (2015). Acta Cryst. A71, 3-8.

Sheldrick, G.M. (2015). Acta Cryst. C71, 3-8.
;
_chemical_name_common              ?
_chemical_name_systematic          ?
_chemical_formula_moiety           'C30 H26 Cl2 Co N4 O4'
_chemical_formula_sum              'C30 H26 Cl2 Co N4 O4'
_chemical_formula_weight           636.38
_chemical_absolute_configuration   ?
_chemical_melting_point            ?
_chemical_oxdiff_formula           'C1 H1 N1 O1'
loop_
  _atom_type_symbol
  _atom_type_description
  _atom_type_scat_dispersion_real
  _atom_type_scat_dispersion_imag
  _atom_type_scat_source
 'C' 'C' 0.0033 0.0016 'International Tables Vol C Tables 4.2.6.8 and 6.1.1.4'
 'H' 'H' 0.0000 0.0000 'International Tables Vol C Tables 4.2.6.8 and 6.1.1.4'
 'Cl' 'Cl' 0.1484 0.1585 'International Tables Vol C Tables 4.2.6.8 and 6.1.1.4'
 'Co' 'Co' 0.3494 0.9721 'International Tables Vol C Tables 4.2.6.8 and 6.1.1.4'
 'N' 'N' 0.0061 0.0033 'International Tables Vol C Tables 4.2.6.8 and 6.1.1.4'
 'O' 'O' 0.0106 0.0060 'International Tables Vol C Tables 4.2.6.8 and 6.1.1.4'

_shelx_space_group_comment
;
The symmetry employed for this shelxl refinement is uniquely defined
by the following loop, which should always be used as a source of
symmetry information in preference to the above space-group names.
They are only intended as comments.
;
_space_group_crystal_system        'hexagonal'
_space_group_IT_number             172
_space_group_name_H-M_alt          'P 64'
_space_group_name_Hall             'P 64'
loop_
  _space_group_symop_operation_xyz
 'x, y, z'
 '-y, x-y, z+1/3'
 '-x+y, -x, z+2/3'
 '-x, -y, z'
 'y, -x+y, z+1/3'
 'x-y, x, z+2/3'

_cell_length_a                     14.0240(6)
_cell_length_b                     14.0240(6)
_cell_length_c                     12.6288(6)
_cell_angle_alpha                  90
_cell_angle_beta                   90
_cell_angle_gamma                  120
_cell_volume                       2151.0(2)
_cell_formula_units_Z              3
_cell_measurement_reflns_used      3144
_cell_measurement_temperature      296(2)
_cell_measurement_theta_max        21.9790
_cell_measurement_theta_min        3.6240
_shelx_estimated_absorpt_T_max     0.907
_shelx_estimated_absorpt_T_min     0.826
_exptl_absorpt_coefficient_mu      0.828
_exptl_absorpt_correction_T_max    1.00000
_exptl_absorpt_correction_T_min    0.56232
_exptl_absorpt_correction_type     multi-scan
_exptl_absorpt_process_details
;
CrysAlisPro, Agilent Technologies,
Version 1.171.37.35 (release 13-08-2014 CrysAlis171 .NET)
(compiled Aug 13 2014,18:06:01)
Empirical absorption correction using spherical harmonics,
 implemented in SCALE3 ABSPACK scaling algorithm.
;
_exptl_absorpt_special_details     ?
_exptl_crystal_colour              red
_exptl_crystal_density_diffrn      1.474
_exptl_crystal_density_meas        ?
_exptl_crystal_density_method      ?
_exptl_crystal_description         block
_exptl_crystal_F_000               981
_exptl_crystal_size_max            0.24
_exptl_crystal_size_mid            0.18
_exptl_crystal_size_min            0.12
_exptl_transmission_factor_max     ?
_exptl_transmission_factor_min     ?
_diffrn_reflns_av_R_equivalents    0.0525
_diffrn_reflns_av_unetI/netI       0.0451
_diffrn_reflns_Laue_measured_fraction_full  0.998
_diffrn_reflns_Laue_measured_fraction_max  0.998
_diffrn_reflns_limit_h_max         16
_diffrn_reflns_limit_h_min         -17
_diffrn_reflns_limit_k_max         17
_diffrn_reflns_limit_k_min         -17
_diffrn_reflns_limit_l_max         15
_diffrn_reflns_limit_l_min         -15
_diffrn_reflns_number              15400
_diffrn_reflns_point_group_measured_fraction_full  0.997
_diffrn_reflns_point_group_measured_fraction_max  0.998
_diffrn_reflns_theta_full          25.242
_diffrn_reflns_theta_max           25.988
_diffrn_reflns_theta_min           3.323
_diffrn_ambient_temperature        296.15
_diffrn_detector                   'CCD plate'
_diffrn_detector_area_resol_mean   16.0233
_diffrn_detector_type              Eos
_diffrn_measured_fraction_theta_full  0.998
_diffrn_measured_fraction_theta_max  0.998
_diffrn_measurement_details
;
#__ type_ start__ end____ width___ exp.time_
  1 omega   22.00   60.00   1.0000    2.5000
omega____ theta____ kappa____ phi______ frames
    -       18.6266  -99.0000  -30.0000 38

#__ type_ start__ end____ width___ exp.time_
  2 omega  -28.00   -2.00   1.0000    2.5000
omega____ theta____ kappa____ phi______ frames
    -      -18.7048  -57.0000 -180.0000 26

#__ type_ start__ end____ width___ exp.time_
  3 omega  -84.00  -58.00   1.0000    2.5000
omega____ theta____ kappa____ phi______ frames
    -      -18.7048  -57.0000 -180.0000 26

#__ type_ start__ end____ width___ exp.time_
  4 omega  -88.00   14.00   1.0000    2.5000
omega____ theta____ kappa____ phi______ frames
    -      -18.7048  -19.0000 -120.0000 102

#__ type_ start__ end____ width___ exp.time_
  5 omega  -45.00   50.00   1.0000    2.5000
omega____ theta____ kappa____ phi______ frames
    -      -18.7048   77.0000 -180.0000 95

#__ type_ start__ end____ width___ exp.time_
  6 omega  -82.00   10.00   1.0000    2.5000
omega____ theta____ kappa____ phi______ frames
    -      -18.7048  -77.0000   60.0000 92
;
_diffrn_measurement_device         'four-circle diffractometer'
_diffrn_measurement_device_type    'SuperNova, Single source at offset, Eos'
_diffrn_measurement_method         '\w scans'
_diffrn_orient_matrix_UB_11        0.0347131000
_diffrn_orient_matrix_UB_12        0.0576652000
_diffrn_orient_matrix_UB_13        -0.0059100000
_diffrn_orient_matrix_UB_21        -0.0468519000
_diffrn_orient_matrix_UB_22        0.0067719000
_diffrn_orient_matrix_UB_23        -0.0006665000
_diffrn_orient_matrix_UB_31        0.0031031000
_diffrn_orient_matrix_UB_32        0.0061744000
_diffrn_orient_matrix_UB_33        0.0558584000
_diffrn_radiation_monochromator    mirror
_diffrn_radiation_probe            x-ray
_diffrn_radiation_type             MoK\a
_diffrn_radiation_wavelength       0.71073
_diffrn_source                     'SuperNova (Mo) X-ray Source'
_reflns_Friedel_coverage           0.908
_reflns_Friedel_fraction_full      0.997
_reflns_Friedel_fraction_max       0.997
_reflns_number_gt                  2255
_reflns_number_total               2827
_reflns_odcompleteness_completeness  99.68
_reflns_odcompleteness_iscentric   1
_reflns_odcompleteness_theta       26.32
_reflns_special_details
;
 Reflections were merged by SHELXL according to the crystal
 class for the calculation of statistics and refinement.
 
 _reflns_Friedel_fraction is defined as the number of unique
 Friedel pairs measured divided by the number that would be
 possible theoretically, ignoring centric projections and
 systematic absences.
;
_reflns_threshold_expression       'I > 2\s(I)'
_computing_cell_refinement
;
CrysAlisPro, Agilent Technologies,
Version 1.171.37.35 (release 13-08-2014 CrysAlis171 .NET)
(compiled Aug 13 2014,18:06:01)
;
_computing_data_collection
;
CrysAlisPro, Agilent Technologies,
Version 1.171.37.35 (release 13-08-2014 CrysAlis171 .NET)
(compiled Aug 13 2014,18:06:01)
;
_computing_data_reduction
;
CrysAlisPro, Agilent Technologies,
Version 1.171.37.35 (release 13-08-2014 CrysAlis171 .NET)
(compiled Aug 13 2014,18:06:01)
;
_computing_molecular_graphics      'Olex2 (Dolomanov et al., 2009)'
_computing_publication_material    'Olex2 (Dolomanov et al., 2009)'
_computing_structure_refinement    'ShelXL (Sheldrick, 2015)'
_computing_structure_solution      'ShelXT (Sheldrick, 2015)'
_refine_diff_density_max           0.250
_refine_diff_density_min           -0.344
_refine_diff_density_rms           0.045
_refine_ls_abs_structure_details
;
 Flack x determined using 866 quotients [(I+)-(I-)]/[(I+)+(I-)]
 (Parsons, Flack and Wagner, Acta Cryst. B69 (2013) 249-259).
;
_refine_ls_abs_structure_Flack     -0.007(10)
_refine_ls_extinction_coef         .
_refine_ls_extinction_method       none
_refine_ls_goodness_of_fit_ref     1.057
_refine_ls_hydrogen_treatment      constr
_refine_ls_matrix_type             full
_refine_ls_number_parameters       188
_refine_ls_number_reflns           2827
_refine_ls_number_restraints       1
_refine_ls_R_factor_all            0.0606
_refine_ls_R_factor_gt             0.0400
_refine_ls_restrained_S_all        1.057
_refine_ls_shift/su_max            0.000
_refine_ls_shift/su_mean           0.000
_refine_ls_structure_factor_coef   Fsqd
_refine_ls_weighting_details      
 'w=1/[\s^2^(Fo^2^)+(0.0229P)^2^+0.7499P] where P=(Fo^2^+2Fc^2^)/3'
_refine_ls_weighting_scheme        calc
_refine_ls_wR_factor_gt            0.0697
_refine_ls_wR_factor_ref           0.0799
_refine_special_details            ?
_olex2_refinement_description
;
1. Fixed Uiso
 At 1.2 times of:
  All C(H) groups, All C(H,H) groups
 At 1.5 times of:
  All C(H,H,H) groups
2.a Secondary CH2 refined with riding coordinates:
 C12(H12A,H12B)
2.b Aromatic/amide H refined with riding coordinates:
 C10(H10), C11(H11), C14(H14), C16(H16), C7(H7), C3(H3), C15(H15), C4(H4),
 C6(H6)
2.c Idealised Me refined as rotating group:
 C8(H8A,H8B,H8C)
;
_atom_sites_solution_hydrogens     geom
_atom_sites_solution_primary       dual
_atom_sites_solution_secondary     ?
loop_
  _atom_site_label
  _atom_site_type_symbol
  _atom_site_fract_x
  _atom_site_fract_y
  _atom_site_fract_z
  _atom_site_U_iso_or_equiv
  _atom_site_adp_type
  _atom_site_occupancy
  _atom_site_site_symmetry_order
  _atom_site_calc_flag
  _atom_site_refinement_flags_posn
  _atom_site_refinement_flags_adp
  _atom_site_refinement_flags_occupancy
  _atom_site_disorder_assembly
  _atom_site_disorder_group
 Co1 Co 1.000000 0.500000 0.42400(7) 0.0416(2) Uani 1 2 d S T P . .
 Cl1 Cl 1.18388(19) 1.05681(15) 0.82607(17) 0.0981(7) Uani 1 1 d . . . . .
 N1 N 0.8619(3) 0.4466(3) 0.3327(3) 0.0385(9) Uani 1 1 d . . . . .
 O1 O 1.0583(3) 0.6421(3) 0.4941(3) 0.0600(10) Uani 1 1 d . . . . .
 N2 N 0.7249(3) 0.4329(3) 0.2385(3) 0.0447(10) Uani 1 1 d . . . . .
 O2 O 0.9124(3) 0.5613(4) 0.5979(4) 0.0849(14) Uani 1 1 d . . . . .
 C13 C 0.5747(4) 0.4804(4) 0.2430(4) 0.0402(11) Uani 1 1 d . . . . .
 C9 C 0.8192(4) 0.5018(4) 0.2882(4) 0.0433(12) Uani 1 1 d . . . . .
 C10 C 0.7905(4) 0.3369(4) 0.3093(4) 0.0426(12) Uani 1 1 d . . . . .
 H10 H 0.799467 0.278363 0.330649 0.051 Uiso 1 1 calc R . . . .
 C2 C 1.0478(4) 0.7453(4) 0.6361(4) 0.0417(12) Uani 1 1 d . . . . .
 C11 C 0.7067(4) 0.3280(4) 0.2511(5) 0.0465(12) Uani 1 1 d . . . . .
 H11 H 0.647768 0.263508 0.224620 0.056 Uiso 1 1 calc R . . . .
 C14 C 0.5735(4) 0.4795(4) 0.3531(4) 0.0444(12) Uani 1 1 d . . . . .
 H14 H 0.622155 0.465178 0.390325 0.053 Uiso 1 1 calc R . . . .
 C1 C 1.0002(5) 0.6410(5) 0.5728(4) 0.0502(13) Uani 1 1 d . . . . .
 C16 C 0.500000 0.500000 0.1890(6) 0.0414(17) Uani 1 2 d S T P . .
 H16 H 0.499999 0.500000 0.115316 0.050 Uiso 1 2 calc RS T P . .
 C7 C 1.1559(4) 0.8259(4) 0.6223(4) 0.0533(14) Uani 1 1 d . . . . .
 H7 H 1.200087 0.816163 0.573678 0.064 Uiso 1 1 calc R . . . .
 C3 C 0.9835(5) 0.7618(5) 0.7080(4) 0.0588(16) Uani 1 1 d . . . . .
 H3 H 0.911011 0.706400 0.718625 0.071 Uiso 1 1 calc R . . . .
 C15 C 0.500000 0.500000 0.4071(5) 0.0432(17) Uani 1 2 d S T P . .
 H15 H 0.500001 0.500000 0.480744 0.052 Uiso 1 2 calc RS T P . .
 C5 C 1.1309(6) 0.9367(5) 0.7511(5) 0.0612(15) Uani 1 1 d . . . . .
 C4 C 1.0236(5) 0.8577(5) 0.7642(5) 0.0641(16) Uani 1 1 d . . . . .
 H4 H 0.978435 0.868617 0.810505 0.077 Uiso 1 1 calc R . . . .
 C6 C 1.1986(5) 0.9225(5) 0.6819(5) 0.0660(17) Uani 1 1 d . . . . .
 H6 H 1.272123 0.976779 0.674899 0.079 Uiso 1 1 calc R . . . .
 C12 C 0.6551(5) 0.4631(5) 0.1770(4) 0.0571(16) Uani 1 1 d . . . . .
 H12A H 0.613985 0.405533 0.125544 0.069 Uiso 1 1 calc R . . . .
 H12B H 0.702139 0.530252 0.138227 0.069 Uiso 1 1 calc R . . . .
 C8 C 0.8706(6) 0.6234(5) 0.2940(6) 0.083(2) Uani 1 1 d . . . . .
 H8A H 0.856027 0.643762 0.362157 0.125 Uiso 1 1 calc GR . . . .
 H8B H 0.840300 0.648323 0.239722 0.125 Uiso 1 1 calc GR . . . .
 H8C H 0.948655 0.656708 0.284049 0.125 Uiso 1 1 calc GR . . . .

loop_
  _atom_site_aniso_label
  _atom_site_aniso_U_11
  _atom_site_aniso_U_22
  _atom_site_aniso_U_33
  _atom_site_aniso_U_23
  _atom_site_aniso_U_13
  _atom_site_aniso_U_12
 Co1 0.0360(5) 0.0435(6) 0.0443(5) 0.000 0.000 0.0191(5)
 Cl1 0.1415(19) 0.0627(11) 0.0966(13) -0.0283(10) -0.0237(13) 0.0559(13)
 N1 0.040(2) 0.038(2) 0.041(2) 0.0048(19) 0.0027(19) 0.022(2)
 O1 0.063(3) 0.057(2) 0.056(2) -0.011(2) 0.007(2) 0.027(2)
 N2 0.040(2) 0.063(3) 0.043(2) -0.002(2) -0.002(2) 0.035(2)
 O2 0.047(2) 0.075(3) 0.101(3) -0.032(3) 0.007(3) 0.007(2)
 C13 0.041(3) 0.051(3) 0.039(3) 0.001(2) 0.000(2) 0.030(2)
 C9 0.046(3) 0.043(3) 0.046(3) 0.003(2) 0.004(2) 0.026(3)
 C10 0.046(3) 0.036(3) 0.048(3) 0.000(2) -0.003(3) 0.023(2)
 C2 0.049(3) 0.050(3) 0.032(2) -0.002(2) -0.002(2) 0.028(3)
 C11 0.046(3) 0.044(3) 0.048(3) -0.006(3) 0.003(3) 0.021(3)
 C14 0.049(3) 0.053(3) 0.038(3) 0.003(2) -0.005(2) 0.030(3)
 C1 0.044(3) 0.064(4) 0.047(3) -0.009(3) -0.007(3) 0.030(3)
 C16 0.040(4) 0.060(5) 0.029(4) 0.000 0.000 0.029(4)
 C7 0.050(3) 0.053(3) 0.056(3) 0.006(3) 0.015(3) 0.025(3)
 C3 0.050(4) 0.071(4) 0.055(4) -0.009(3) 0.004(3) 0.030(3)
 C15 0.059(5) 0.053(5) 0.025(4) 0.000 0.000 0.034(4)
 C5 0.086(5) 0.049(3) 0.055(3) -0.010(3) -0.012(4) 0.039(3)
 C4 0.076(4) 0.082(4) 0.053(4) -0.012(3) 0.001(3) 0.053(4)
 C6 0.061(4) 0.043(3) 0.077(4) -0.004(3) 0.006(3) 0.014(3)
 C12 0.062(4) 0.097(5) 0.040(3) 0.003(3) 0.001(3) 0.060(4)
 C8 0.095(5) 0.044(3) 0.114(6) 0.008(4) -0.015(5) 0.037(4)

_geom_special_details
;
 All esds (except the esd in the dihedral angle between two l.s. planes)
 are estimated using the full covariance matrix.  The cell esds are taken
 into account individually in the estimation of esds in distances, angles
 and torsion angles; correlations between esds in cell parameters are only
 used when they are defined by crystal symmetry.  An approximate (isotropic)
 treatment of cell esds is used for estimating esds involving l.s. planes.
;
loop_
  _geom_bond_atom_site_label_1
  _geom_bond_atom_site_label_2
  _geom_bond_distance
  _geom_bond_site_symmetry_2
  _geom_bond_publ_flag
 Co1 N1 2.048(4) . ?
 Co1 N1 2.048(4) 4_765 ?
 Co1 O1 1.948(4) . ?
 Co1 O1 1.948(4) 4_765 ?
 Cl1 C5 1.742(6) . ?
 N1 C9 1.319(6) . ?
 N1 C10 1.384(6) . ?
 O1 C1 1.281(6) . ?
 N2 C9 1.340(6) . ?
 N2 C11 1.371(6) . ?
 N2 C12 1.468(6) . ?
 O2 C1 1.220(6) . ?
 C13 C14 1.391(7) . ?
 C13 C16 1.387(6) . ?
 C13 C12 1.517(7) . ?
 C9 C8 1.484(7) . ?
 C10 H10 0.9300 . ?
 C10 C11 1.338(7) . ?
 C2 C1 1.499(7) . ?
 C2 C7 1.376(7) . ?
 C2 C3 1.379(7) . ?
 C11 H11 0.9300 . ?
 C14 H14 0.9300 . ?
 C14 C15 1.380(6) . ?
 C16 H16 0.9300 . ?
 C7 H7 0.9300 . ?
 C7 C6 1.396(8) . ?
 C3 H3 0.9300 . ?
 C3 C4 1.367(8) . ?
 C15 H15 0.9300 . ?
 C5 C4 1.361(8) . ?
 C5 C6 1.376(8) . ?
 C4 H4 0.9300 . ?
 C6 H6 0.9300 . ?
 C12 H12A 0.9700 . ?
 C12 H12B 0.9700 . ?
 C8 H8A 0.9600 . ?
 C8 H8B 0.9600 . ?
 C8 H8C 0.9600 . ?

loop_
  _geom_angle_atom_site_label_1
  _geom_angle_atom_site_label_2
  _geom_angle_atom_site_label_3
  _geom_angle
  _geom_angle_site_symmetry_1
  _geom_angle_site_symmetry_3
  _geom_angle_publ_flag
 N1 Co1 N1 111.5(2) . 4_765 ?
 O1 Co1 N1 117.81(16) . . ?
 O1 Co1 N1 92.58(15) . 4_765 ?
 O1 Co1 N1 117.81(16) 4_765 4_765 ?
 O1 Co1 N1 92.58(15) 4_765 . ?
 O1 Co1 O1 126.0(2) . 4_765 ?
 C9 N1 Co1 130.5(3) . . ?
 C9 N1 C10 105.9(4) . . ?
 C10 N1 Co1 123.6(3) . . ?
 C1 O1 Co1 113.6(4) . . ?
 C9 N2 C11 107.9(4) . . ?
 C9 N2 C12 126.8(4) . . ?
 C11 N2 C12 125.3(5) . . ?
 C14 C13 C12 123.7(4) . . ?
 C16 C13 C14 119.1(5) . . ?
 C16 C13 C12 117.2(5) . . ?
 N1 C9 N2 110.4(4) . . ?
 N1 C9 C8 123.4(5) . . ?
 N2 C9 C8 126.1(5) . . ?
 N1 C10 H10 125.2 . . ?
 C11 C10 N1 109.5(4) . . ?
 C11 C10 H10 125.2 . . ?
 C7 C2 C1 120.3(5) . . ?
 C7 C2 C3 119.3(5) . . ?
 C3 C2 C1 120.4(5) . . ?
 N2 C11 H11 126.9 . . ?
 C10 C11 N2 106.3(5) . . ?
 C10 C11 H11 126.9 . . ?
 C13 C14 H14 120.0 . . ?
 C15 C14 C13 119.9(5) . . ?
 C15 C14 H14 120.0 . . ?
 O1 C1 C2 115.6(5) . . ?
 O2 C1 O1 123.8(5) . . ?
 O2 C1 C2 120.6(5) . . ?
 C13 C16 C13 121.1(7) 4_665 . ?
 C13 C16 H16 119.4 4_665 . ?
 C13 C16 H16 119.4 . . ?
 C2 C7 H7 120.3 . . ?
 C2 C7 C6 119.4(5) . . ?
 C6 C7 H7 120.3 . . ?
 C2 C3 H3 119.2 . . ?
 C4 C3 C2 121.6(6) . . ?
 C4 C3 H3 119.2 . . ?
 C14 C15 C14 120.8(6) 4_665 . ?
 C14 C15 H15 119.6 4_665 . ?
 C14 C15 H15 119.6 . . ?
 C4 C5 Cl1 119.0(5) . . ?
 C4 C5 C6 121.4(6) . . ?
 C6 C5 Cl1 119.6(5) . . ?
 C3 C4 H4 120.6 . . ?
 C5 C4 C3 118.8(6) . . ?
 C5 C4 H4 120.6 . . ?
 C7 C6 H6 120.3 . . ?
 C5 C6 C7 119.4(6) . . ?
 C5 C6 H6 120.3 . . ?
 N2 C12 C13 114.4(4) . . ?
 N2 C12 H12A 108.7 . . ?
 N2 C12 H12B 108.7 . . ?
 C13 C12 H12A 108.7 . . ?
 C13 C12 H12B 108.7 . . ?
 H12A C12 H12B 107.6 . . ?
 C9 C8 H8A 109.5 . . ?
 C9 C8 H8B 109.5 . . ?
 C9 C8 H8C 109.5 . . ?
 H8A C8 H8B 109.5 . . ?
 H8A C8 H8C 109.5 . . ?
 H8B C8 H8C 109.5 . . ?

loop_
  _geom_hbond_atom_site_label_D
  _geom_hbond_atom_site_label_H
  _geom_hbond_atom_site_label_A
  _geom_hbond_distance_DH
  _geom_hbond_distance_HA
  _geom_hbond_distance_DA
  _geom_hbond_angle_DHA
  _geom_hbond_site_symmetry_A
  _geom_hbond_publ_flag
 C16 H16 O2 0.93 2.95 3.728(8) 142.0 2_654 yes
 C16 H16 O2 0.93 2.95 3.728(8) 142.0 5_564 yes
 C15 H15 N1 0.93 2.89 3.682(7) 144.1 2_655 yes
 C15 H15 N1 0.93 2.89 3.682(7) 144.1 5_565 yes
 C4 H4 Cl1 0.93 2.95 3.743(6) 144.2 4_775 yes
 C8 H8A Cl1 0.96 2.84 3.676(7) 146.6 3_674 yes

loop_
  _geom_torsion_atom_site_label_1
  _geom_torsion_atom_site_label_2
  _geom_torsion_atom_site_label_3
  _geom_torsion_atom_site_label_4
  _geom_torsion
  _geom_torsion_site_symmetry_1
  _geom_torsion_site_symmetry_2
  _geom_torsion_site_symmetry_3
  _geom_torsion_site_symmetry_4
  _geom_torsion_publ_flag
 Co1 N1 C9 N2 -177.5(3) . . . . ?
 Co1 N1 C9 C8 2.4(8) . . . . ?
 Co1 N1 C10 C11 178.1(3) . . . . ?
 Co1 O1 C1 O2 -4.9(7) . . . . ?
 Co1 O1 C1 C2 173.9(3) . . . . ?
 Cl1 C5 C4 C3 -177.6(4) . . . . ?
 Cl1 C5 C6 C7 179.8(5) . . . . ?
 N1 C10 C11 N2 -0.4(6) . . . . ?
 C13 C14 C15 C14 0.6(3) . . . 4_665 ?
 C9 N1 C10 C11 0.1(6) . . . . ?
 C9 N2 C11 C10 0.6(6) . . . . ?
 C9 N2 C12 C13 -84.1(7) . . . . ?
 C10 N1 C9 N2 0.2(5) . . . . ?
 C10 N1 C9 C8 -179.9(5) . . . . ?
 C2 C7 C6 C5 -1.9(9) . . . . ?
 C2 C3 C4 C5 -2.4(9) . . . . ?
 C11 N2 C9 N1 -0.5(6) . . . . ?
 C11 N2 C9 C8 179.6(6) . . . . ?
 C11 N2 C12 C13 98.9(6) . . . . ?
 C14 C13 C16 C13 0.6(3) . . . 4_665 ?
 C14 C13 C12 N2 6.4(8) . . . . ?
 C1 C2 C7 C6 179.9(5) . . . . ?
 C1 C2 C3 C4 -177.7(5) . . . . ?
 C16 C13 C14 C15 -1.2(7) . . . . ?
 C16 C13 C12 N2 -174.7(4) . . . . ?
 C7 C2 C1 O1 -12.8(7) . . . . ?
 C7 C2 C1 O2 166.0(5) . . . . ?
 C7 C2 C3 C4 1.7(8) . . . . ?
 C3 C2 C1 O1 166.6(5) . . . . ?
 C3 C2 C1 O2 -14.6(8) . . . . ?
 C3 C2 C7 C6 0.5(8) . . . . ?
 C4 C5 C6 C7 1.2(10) . . . . ?
 C6 C5 C4 C3 0.9(10) . . . . ?
 C12 N2 C9 N1 -177.9(4) . . . . ?
 C12 N2 C9 C8 2.2(9) . . . . ?
 C12 N2 C11 C10 178.0(5) . . . . ?
 C12 C13 C14 C15 177.6(4) . . . . ?
 C12 C13 C16 C13 -178.3(5) . . . 4_665 ?

_shelx_res_file
;
TITL lfx34_a.res in P6(4)
    lfx34.res
    created by SHELXL-2018/1 at 15:32:37 on 11-Apr-2018
REM Old TITL LFX34 in P62 #171
REM SHELXT solution in P6(4): R1 0.194, Rweak 0.112, Alpha 0.005
REM <I/s> 0.965 for 8 systematic absences, Orientation as input
REM Flack x = 0.300 ( 0.005 ) from 904 Parsons' quotients
REM Formula found by SHELXT: C30 N6 O4 Br
CELL 0.71073 14.024 14.024 12.6288 90 90 120
ZERR 3 0.0006 0.0006 0.0006 0 0 0
LATT -1
SYMM -Y,+X-Y,0.333+Z
SYMM +Y-X,-X,0.667+Z
SYMM -X,-Y,+Z
SYMM +Y,-X+Y,0.333+Z
SYMM -Y+X,+X,0.667+Z
SFAC C H Cl Co N O
UNIT 90 78 6 3 12 12
EQIV $1 1-Y,+X-Y,-0.667+Z
EQIV $2 +Y,1-X+Y,-0.667+Z
EQIV $3 1-Y,+X-Y,0.333+Z
EQIV $4 +Y,1-X+Y,0.333+Z
EQIV $5 2-X,2-Y,+Z
EQIV $6 1+Y-X,2-X,-0.333+Z

L.S. 60 0 47
PLAN  5
SIZE 0.24 0.18 0.12
TEMP 23
HTAB C16 O2_$1
HTAB C16 O2_$2
HTAB C15 N1_$3
HTAB C15 N1_$4
HTAB C4 Cl1_$5
HTAB C8 Cl1_$6
BOND $H
CONF
list 4
fmap 2
acta
OMIT -3 52
REM <olex2.extras>
REM <HklSrc "%.\\LFX34.hkl">
REM </olex2.extras>

WGHT    0.022900    0.749900
FVAR       0.69652
CO1   4    1.000000    0.500000    0.424000    10.50000    0.03598    0.04346 =
         0.04426    0.00000    0.00000    0.01911
CL1   3    1.183884    1.056813    0.826068    11.00000    0.14146    0.06274 =
         0.09659   -0.02830   -0.02366    0.05591
N1    5    0.861851    0.446574    0.332705    11.00000    0.04006    0.03841 =
         0.04065    0.00482    0.00267    0.02231
O1    6    1.058321    0.642149    0.494073    11.00000    0.06319    0.05721 =
         0.05555   -0.01148    0.00692    0.02712
N2    5    0.724927    0.432905    0.238518    11.00000    0.04028    0.06342 =
         0.04296   -0.00171   -0.00153    0.03537
O2    6    0.912450    0.561311    0.597867    11.00000    0.04714    0.07517 =
         0.10116   -0.03159    0.00658    0.00722
C13   1    0.574675    0.480400    0.242951    11.00000    0.04065    0.05085 =
         0.03873    0.00118    0.00005    0.03002
C9    1    0.819171    0.501839    0.288153    11.00000    0.04592    0.04328 =
         0.04603    0.00260    0.00438    0.02624
C10   1    0.790505    0.336866    0.309279    11.00000    0.04650    0.03643 =
         0.04816   -0.00008   -0.00285    0.02315
AFIX  43
H10   2    0.799467    0.278363    0.330649    11.00000   -1.20000
AFIX   0
C2    1    1.047789    0.745272    0.636097    11.00000    0.04878    0.04973 =
         0.03170   -0.00237   -0.00241    0.02844
C11   1    0.706654    0.327971    0.251147    11.00000    0.04572    0.04393 =
         0.04786   -0.00618    0.00319    0.02088
AFIX  43
H11   2    0.647768    0.263508    0.224620    11.00000   -1.20000
AFIX   0
C14   1    0.573481    0.479535    0.353102    11.00000    0.04902    0.05312 =
         0.03780    0.00349   -0.00467    0.03050
AFIX  43
H14   2    0.622155    0.465178    0.390325    11.00000   -1.20000
AFIX   0
C1    1    1.000179    0.641041    0.572764    11.00000    0.04384    0.06358 =
         0.04675   -0.00886   -0.00680    0.02956
C16   1    0.500000    0.500000    0.188957    10.50000    0.04049    0.06043 =
         0.02856    0.00000    0.00000    0.02910
AFIX  43
H16   2    0.499999    0.500000    0.115316    10.50000   -1.20000
AFIX   0
C7    1    1.155874    0.825915    0.622294    11.00000    0.05026    0.05343 =
         0.05552    0.00643    0.01462    0.02538
AFIX  43
H7    2    1.200087    0.816163    0.573678    11.00000   -1.20000
AFIX   0
C3    1    0.983484    0.761807    0.708040    11.00000    0.04984    0.07090 =
         0.05484   -0.00945    0.00433    0.02955
AFIX  43
H3    2    0.911011    0.706400    0.718625    11.00000   -1.20000
AFIX   0
C15   1    0.500000    0.500000    0.407103    10.50000    0.05916    0.05307 =
         0.02477    0.00000    0.00000    0.03368
AFIX  43
H15   2    0.500001    0.500000    0.480744    10.50000   -1.20000
AFIX   0
C5    1    1.130916    0.936705    0.751145    11.00000    0.08632    0.04919 =
         0.05517   -0.00986   -0.01227    0.03914
C4    1    1.023640    0.857654    0.764204    11.00000    0.07553    0.08237 =
         0.05252   -0.01244    0.00066    0.05295
AFIX  43
H4    2    0.978435    0.868617    0.810505    11.00000   -1.20000
AFIX   0
C6    1    1.198622    0.922536    0.681910    11.00000    0.06143    0.04314 =
         0.07685   -0.00379    0.00590    0.01366
AFIX  43
H6    2    1.272123    0.976779    0.674899    11.00000   -1.20000
AFIX   0
C12   1    0.655149    0.463070    0.177006    11.00000    0.06228    0.09658 =
         0.03977    0.00296    0.00120    0.06024
AFIX  23
H12A  2    0.613985    0.405533    0.125544    11.00000   -1.20000
H12B  2    0.702139    0.530252    0.138227    11.00000   -1.20000
AFIX   0
C8    1    0.870576    0.623386    0.294040    11.00000    0.09466    0.04416 =
         0.11397    0.00796   -0.01460    0.03740
AFIX 137
H8A   2    0.856027    0.643762    0.362157    11.00000   -1.50000
H8B   2    0.840300    0.648323    0.239722    11.00000   -1.50000
H8C   2    0.948655    0.656708    0.284049    11.00000   -1.50000
AFIX   0
HKLF 4


REM  lfx34_a.res in P6(4)
REM R1 =  0.0400 for    2255 Fo > 4sig(Fo)  and  0.0606 for all    2827 data
REM    188 parameters refined using      1 restraints

END

WGHT      0.0229      0.7494

REM Highest difference peak  0.250,  deepest hole -0.344,  1-sigma level  0.045
Q1    1   1.2547  1.0589  0.8141  11.00000  0.05    0.25
Q2    1   1.0000  1.0000  0.7528  10.50000  0.05    0.21
Q3    1   1.1389  1.0063  0.8709  11.00000  0.05    0.18
Q4    1   0.8501  0.5065  0.4129  11.00000  0.05    0.17
Q5    1   1.1593  0.6809  0.6471  11.00000  0.05    0.16
;
_shelx_res_checksum                94746
_shelx_hkl_file
;
   0   0 -17   17.93   13.79
   0   0 -16    6.86   11.23
   0   0 -15  208.20   35.93
   0   0 -14    7.86   10.71
   0   0 -14  -23.04   13.74
   0   0 -13   -3.11   11.14
   0   0 -13   -0.34    8.79
   0   0 -12  909.82   69.91
   0   0 -11   23.80   14.94
   0   0 -10    5.55    7.77
   0   0  -9  250.97   32.19
   0   0  -8    5.15    6.59
   0   0  -7    7.93    6.63
   0   0  -5    4.62    4.81
   0   0  -5   12.11    4.98
   0   0  -4    4.96    4.01
   0   0  -4    0.90    2.77
   0   0  -3 1930.00   54.33
   0   0  -3 1947.11   46.25
   0   0   3 1981.70   55.37
   0   0   3 1905.50   44.70
   0   0   4   -0.39    3.16
   0   0   4    1.68    4.19
   0   0   5   -2.17    5.20
   0   0   5    0.02    6.21
   0   0   6 1541.92   68.76
   0   0   6 1451.96   55.78
   0   0   7   -4.03    7.80
   0   0   7   -0.86    5.75
   0   0   8    1.84    7.95
   0   0   8   19.74    9.86
   0   0   9  213.44   32.77
   0   0   9  190.08   25.66
   0   0  10   20.51   14.27
   0   0  10   14.03   10.93
   0   0  11   13.46   11.17
   0   0  11    2.64    9.90
   0   0  12  879.21   64.62
   1  -1 -17   -4.35   10.37
   0  -1 -17   -0.21    7.43
   0   1 -17  -11.98   11.99
   0  -1 -16   -4.60    9.15
   1   0 -16  -14.21   12.62
  -1   1 -16  -10.13   10.32
   0   1 -16    7.10    8.09
  -1   0 -16  -11.71   10.74
   1  -1 -16    3.58   10.01
  -1   1 -15    2.47    7.14
  -1   0 -15   -1.81   11.44
   0  -1 -15    5.22   10.40
   1   0 -15   -3.64    8.82
   1  -1 -15   18.65   14.00
  -1   1 -15    9.71   11.34
   0   1 -15   -0.18    7.68
   0  -1 -14   62.00   20.22
  -1   1 -14  119.22   30.40
   0   1 -14  104.31   27.06
   1   0 -14   56.55   19.66
  -1   0 -14   57.88   19.20
  -1   0 -14   58.46   22.23
   1  -1 -14   85.91   24.71
  -1   1 -13   44.85   18.55
   0  -1 -13   30.49   14.60
   1  -1 -13   54.65   18.32
  -1   0 -13   32.05   15.65
  -1   0 -13   79.73   23.91
   1   0 -13   46.36   17.03
   0  -1 -13   48.02   16.12
   1  -1 -13   38.99   16.68
   0   1 -13   40.80   19.58
  -1   0 -12   14.90    9.57
   1  -1 -12   41.05   14.42
   1   0 -12   42.46   15.03
   0  -1 -12   46.05   14.58
  -1   0 -12   38.06   15.78
  -1   1 -12   25.33   13.35
   0  -1 -12   15.81   11.68
   1  -1 -12   31.57   16.54
   0   1 -12   38.50   18.39
  -1   0 -11   93.28   22.34
  -1   1 -11  100.17   24.66
   0   1 -11  107.43   24.77
   1  -1 -11   68.50   19.93
   1   0 -11  102.99   23.31
   1  -1 -11   97.97   21.24
   0  -1 -11   83.05   21.39
   0  -1 -11  101.11   23.02
  -1   1 -10  217.04   34.08
   0   1 -10  154.99   27.62
   0  -1 -10  271.38   36.28
   1   0 -10  189.76   28.85
  -1   0 -10  236.21   33.73
   0  -1 -10  198.15   29.71
   1  -1 -10  209.43   29.23
   1  -1 -10  148.82   27.96
   1  -1  -9   87.97   18.03
  -1   0  -9   99.07    9.41
   0  -1  -9   94.47   21.43
   0   1  -9  122.84   23.77
  -1   1  -9  114.30   23.79
   1   0  -9  105.87   20.70
  -1   1  -8  138.27   24.68
  -1   0  -8  105.51   10.53
   0   1  -8  103.98   21.06
   0  -1  -8  108.28    8.97
   1  -1  -8  118.77   19.36
   1   0  -8  110.31   18.99
   1   0  -7  734.75   45.09
  -1   0  -7  690.98   27.44
   0  -1  -7  717.20   25.16
   0   1  -7  680.24   47.26
  -1   1  -7  699.69   24.76
   1  -1  -7  700.25   42.56
   0   1  -6  493.99   37.79
   1   0  -6  555.63   36.21
   1  -1  -6  526.67   33.40
   0  -1  -6  527.67   21.78
  -1   1  -6  564.90   22.43
  -1   0  -6  566.08   33.72
  -1   0  -6  524.86   23.86
   1  -1  -5  495.43   28.87
   1   0  -5  496.74   35.87
   0  -1  -5  461.64   20.18
   1  -1  -5  503.80   32.01
   1   0  -5  568.96   34.29
  -1   0  -5  567.80   30.32
   0   1  -5  521.02   35.28
   0  -1  -5  539.81   31.31
  -1   0  -5  503.49   22.92
  -1   1  -5  521.98   20.86
  -1   1  -5  511.35   29.39
   1   0  -5  458.58   29.91
   0   1  -5  485.02   34.28
   0   1  -5  555.66   32.42
  -1   0  -4  134.56   11.45
  -1   1  -4  137.10   10.56
   0  -1  -4  130.50   13.78
   1  -1  -4  141.12   15.45
  -1   0  -4  115.30   12.11
  -1   1  -4  116.63   12.34
   0   1  -4  112.30   14.30
   0  -1  -4  135.86   10.82
   1  -1  -4  139.76   18.10
   1   0  -4  140.61   15.60
   0   1  -4  132.37   16.48
   0   1  -4  126.87   14.24
   1   0  -4  142.45   17.23
   1   0  -4  148.54   15.07
   0  -1  -4  130.63   16.96
   0   1  -3 3624.04   70.04
   1   0  -3 3800.87   64.08
   0   1  -3 3749.98   66.83
   1   0  -3 3770.47   75.53
   1  -1  -3 3768.63   80.42
  -1   0  -3 3643.82   56.40
  -1   0  -3 3799.83   57.85
   1  -1  -3 3801.04   69.29
   0  -1  -3 3776.58   80.54
   1   0  -3 3721.22   70.27
   0  -1  -3 3630.55   67.78
   0   1  -3 3712.73   75.22
  -1   1  -3 3768.24   52.27
  -1   1  -3 3771.76   60.02
   0  -1  -3 3949.16   64.46
   1  -1  -2 1658.79   42.47
   0  -1  -2 1734.37   38.14
   1  -1  -2 1620.23   44.63
  -1   1  -2 1670.15   32.49
   0   1  -2 1704.48   38.06
  -1   0  -2 1656.08   29.15
   1  -1  -2 1658.28   39.08
  -1   0  -2 1673.80   35.78
   0   1  -2 1731.97   37.63
   0   1  -2 1704.61   43.23
   0  -1  -2 1641.02   44.85
   1   0  -2 1729.54   40.56
  -1   1  -2 1645.52   32.89
  -1   0   2 1725.56   37.04
   0  -1   2 1836.73   46.42
   0   1   2 1621.74   38.22
   0   1   2 1683.36   44.70
   1   0   2 1732.21   28.42
   0  -1   2 1803.13   36.98
   1   0   2 1665.86   36.37
  -1   0   2 1747.20   39.94
   1  -1   2 1733.89   33.14
   0  -1   2 1731.54   38.18
   1  -1   2 1751.03   34.95
   1  -1   3 3595.53   53.81
  -1   1   3 3790.75   66.54
   1  -1   3 3506.74   69.54
   1   0   3 3621.94   76.50
   1   0   3 3505.76   55.78
   0  -1   3 3618.26   66.56
   0  -1   3 3564.12   41.32
   1   0   3 3600.04   54.61
   0  -1   3 3657.17   69.12
   1  -1   3 3654.43   60.31
  -1   1   3 3624.95   78.00
  -1   0   3 3603.96   65.73
   0   1   3 3729.43   80.34
  -1   0   3 3619.28   69.98
   0  -1   4   68.34   10.84
  -1   1   4   64.52   13.00
   1   0   4   76.91   13.24
   1  -1   4   74.96    8.13
   0   1   4   63.06   12.34
   1  -1   4   81.77   10.84
   1   0   4   62.17    9.11
  -1   0   4  102.29   13.47
   1  -1   4   71.79   12.19
   1   0   4   77.86    8.81
   0  -1   4   86.98   12.67
  -1   1   4   77.62   11.15
   0   1   5  600.77   40.89
   0  -1   5  581.51   36.79
  -1   1   5  579.25   33.09
  -1   0   5  574.58   35.83
   1   0   5  603.79   30.47
   1  -1   5  588.72   31.87
   1   0   5  571.54   39.20
   0   1   5  586.39   31.41
   1  -1   5  536.87   22.33
  -1   1   5  587.67   39.69
   1  -1   5  545.67   36.35
   1   0   5  599.34   25.04
   0  -1   5  596.58   34.65
  -1   0   6  461.77   33.58
   1   0   6  531.54   31.81
  -1   1   6  522.87   41.22
   0  -1   6  562.89   39.96
   1  -1   6  526.22   33.27
   1   0   6  541.08   41.94
   0  -1   6  527.06   35.32
  -1   1   6  501.12   33.40
   0   1   6  558.18   43.24
   1  -1   6  545.14   40.48
   0   1   6  520.53   32.37
   1  -1   6  497.09   21.68
   1   0   7  818.46   55.77
   0   1   7  707.16   52.55
  -1   1   7  842.66   47.06
   1   0   7  889.02   44.88
   0  -1   7  761.84   45.98
  -1   1   7  718.13   51.84
   1  -1   7  761.50   52.11
   0   1   7  845.22   44.89
  -1   0   7  853.70   48.72
   1  -1   7  781.79   44.04
   1  -1   7  753.66   26.21
   0  -1   7  769.05   50.85
   0   1   8  105.80   17.46
   1   0   8   97.63   21.51
   0  -1   8   87.59   17.13
   0  -1   8  114.36   22.76
   1   0   8  119.72   18.17
   0   1   8  103.89   21.79
  -1   1   8  121.57   24.35
   1  -1   8  141.88   21.12
   1  -1   8  134.44   24.42
  -1   1   8  115.77   19.62
  -1   0   8  121.34   20.78
   1   0   9  128.32   27.17
  -1   1   9  114.68   24.32
   1   0   9  127.08   20.38
   0  -1   9  125.65   21.41
   1  -1   9  146.19   26.92
   1  -1   9  152.36   23.48
   0   1   9  130.08   26.16
  -1   1   9  103.15   19.28
   0  -1   9  132.87   25.27
  -1   0   9  152.81   24.33
   1   0  10  210.01   27.71
   0   1  10  202.72   34.07
   1  -1  10  210.25   34.88
  -1   1  10  194.03   27.98
   1   0  10  186.60   33.54
  -1   0  10  201.31   28.67
   0  -1  10  159.27   26.41
   1  -1  10  229.70   30.61
   1  -1  11  134.84   29.12
   0  -1  11  112.01   23.50
   1   0  11   81.30   17.93
  -1   0  11   71.67   19.75
   1  -1  11  105.82   21.58
   0   1  11  109.93   26.95
   1   0  11  101.42   27.58
   1  -1  12   29.99   15.79
   1   0  12   30.55   16.63
   0  -1  12   62.83   20.94
  -1   0  12   67.79   19.75
   1  -1  12   23.86   12.16
   0   1  12   36.91   17.95
   0  -1  13   54.85   17.82
  -1   0  13   32.40   15.09
   1   0  13   26.31   17.59
   1  -1  13   74.61   21.25
   0  -1  14   96.79   23.77
  -1   2 -17    3.80   10.19
   1  -2 -17  -12.09   13.87
   2  -1 -16   21.22   13.78
  -1  -1 -16   -3.81    9.66
  -2   1 -16   15.93   11.61
   1   1 -16    1.79    8.91
   1  -2 -16    3.87    9.45
  -2   1 -15  -22.81   13.65
  -1   2 -15   19.06   16.00
  -2   1 -15   29.59   19.02
   1  -2 -15   32.29   17.21
  -1  -1 -15   48.53   19.28
   2  -1 -15   13.64   14.01
   2  -1 -14   55.69   22.05
  -2   1 -14   33.92   14.57
  -1  -1 -14   53.45   18.34
  -2   1 -14   74.79   24.53
  -1  -1 -14   83.45   24.16
   1  -2 -14   94.59   27.66
  -1   2 -14   71.20   24.35
   2  -1 -13   51.06   20.43
  -2   1 -13   53.53   20.52
  -1   2 -13   54.11   21.39
  -1  -1 -13   63.79   20.94
   1  -2 -13   79.41   23.15
  -1  -1 -13   82.68   23.23
  -1  -1 -12    2.92    9.50
  -2   1 -12    4.14    9.88
   1  -2 -12   14.12   13.00
  -1  -1 -12   22.77   14.75
   1  -2 -12    8.82    9.23
  -1   2 -12   42.87   18.08
   1   1 -11   52.03   15.31
   1  -2 -11   87.68   19.03
  -1  -1 -11   62.99   18.18
  -1   2 -11   59.59   20.24
  -2   1 -11   64.14   20.50
   2  -1 -11   51.26   20.11
   1  -2 -11   96.60   24.24
   2  -1 -11   55.69   15.45
   1  -2 -10  443.68   48.20
   1   1 -10  505.78   47.86
   1  -2 -10  452.95   41.22
  -1  -1 -10  496.33   47.53
   2  -1 -10  470.60   41.14
  -1  -1 -10  443.05   23.46
  -1   2 -10  513.98   51.94
  -2   1 -10  452.61   23.83
  -1  -1  -9   82.91   19.58
   2  -1  -9   81.75   16.52
   1  -2  -9  104.16   23.27
  -1  -1  -9  121.99   13.62
   1   1  -9  136.95   24.04
   1  -2  -9   93.65   17.89
  -1   2  -9  115.73   24.08
  -2   1  -9  103.68   12.46
  -1   2  -8  541.42   48.02
   2  -1  -8  629.20   41.54
   1  -2  -8  590.56   49.09
   1  -2  -8  509.49   20.48
  -1  -1  -8  517.87   42.44
  -1  -1  -8  552.74   29.69
  -2   1  -8  551.93   28.88
   1   1  -8  599.85   46.53
   1  -2  -7  511.66   42.54
  -1  -1  -7  490.69   28.01
  -1  -1  -7  416.27   35.17
   1  -2  -7  498.59   22.44
   1   1  -7  537.41   40.74
   2  -1  -7  569.10   36.33
  -1   2  -7  472.14   42.47
  -2   1  -7  518.26   28.21
   1  -2  -6   12.16    4.04
  -1  -1  -6   21.92    6.85
  -1  -1  -6   19.46    6.11
   2  -1  -6   20.34    6.72
   1   1  -6   11.60    6.25
  -1   2  -6   16.52    9.60
   1  -2  -6   16.56    9.54
  -1  -1  -6   16.62    7.64
  -1  -1  -5 1286.29   43.40
  -1   2  -5 1297.84   60.71
   1   1  -5 1323.67   54.15
  -2   1  -5 1292.47   43.01
   1  -2  -5 1387.45   52.74
   1  -2  -5 1197.66   53.86
   2  -1  -5 1305.68   43.34
  -1  -1  -5 1369.00   46.78
   1   1  -5 1251.65   54.53
  -1  -1  -5 1242.15   48.92
  -2   1  -5 1259.03   42.53
  -1   2  -5 1297.43   47.97
   1  -2  -4 1574.03   62.26
   1   1  -4 1601.81   52.78
  -1  -1  -4 1574.18   46.79
   2  -1  -4 1690.16   55.89
  -1   2  -4 1594.96   48.01
   2  -1  -4 1672.06   63.52
  -1   2  -4 1561.47   61.32
   1   1  -4 1584.93   54.30
   1  -2  -4 1663.97   52.07
   2  -1  -4 1546.78   30.12
  -2   1  -4 1552.06   40.91
  -1  -1  -4 1653.27   44.86
  -1  -1  -4 1470.51   46.13
  -2   1  -4 1553.27   45.35
   1  -2  -4 1604.43   55.89
   2  -1  -3 1174.69   28.82
   2  -1  -3 1190.33   42.07
  -1  -1  -3 1224.55   32.49
  -2   1  -3 1160.24   38.29
   1  -2  -3 1136.78   47.50
  -1   2  -3 1214.18   37.05
  -2   1  -3 1158.77   29.14
  -1   2  -3 1263.63   49.38
  -1  -1  -3 1146.64   33.64
  -1  -1  -3 1176.75   38.74
   1   1  -3 1249.38   41.69
   1  -2  -3 1184.17   42.73
  -1   2  -2 5814.36   93.58
  -1  -1  -2 5860.38   82.59
   2  -1  -2 5900.67   81.08
  -2   1  -2 5874.26   81.63
   1  -2  -2 5966.73   93.65
   1   1  -2 5872.96   79.34
   2  -1  -2 5832.02   48.11
  -1  -1  -2 5820.86   59.06
   1  -2  -2 5774.19   81.57
  -2   1  -2 5742.45   47.50
   2  -1  -2 5846.48   68.72
  -1   2  -2 5789.01   69.29
  -2   1  -1 3325.98   58.71
   1   1  -1 3252.09   52.21
   2  -1  -1 3183.36   54.30
   1   1  -1 3231.59   48.50
   2  -1  -1 3223.60   49.57
  -1  -1  -1 3206.21   31.22
  -1  -1  -1 3173.09   57.67
  -1  -1   1 3249.25   48.46
   1   1   1 3088.65   33.42
   2  -1   1 3182.34   59.16
  -1   2   1 3216.85   36.34
   1  -2   1 3236.98   44.62
   1  -2   2 5804.84   74.56
  -1   2   2 5907.24   91.38
   1   1   2 5689.59   62.45
   2  -1   2 5725.01   50.11
   1  -2   2 5988.14   59.82
  -1   2   2 5893.12   85.93
  -2   1   2 5706.75   77.23
  -1  -1   2 5880.38   79.43
   1  -2   2 5717.25   94.69
  -2   1   2 5915.78   66.50
   2  -1   2 5906.28   84.22
   1  -2   2 5754.45   69.95
  -1   2   3 1133.77   46.62
   1  -2   3 1153.28   36.86
  -1  -1   3 1197.50   41.68
   2  -1   3 1115.25   29.71
   1  -2   3 1152.63   34.23
  -1  -1   3 1127.91   42.42
  -1   2   3 1123.89   43.11
   1  -2   3 1135.54   35.95
  -2   1   3 1130.52   26.84
  -2   1   3 1073.03   38.48
  -2   1   3 1101.35   30.46
   2  -1   3 1130.56   38.49
   1   1   3 1147.49   47.29
   1  -2   4 1450.92   38.65
  -1  -1   4 1366.49   52.40
   2  -1   4 1430.24   40.48
   2  -1   4 1433.43   44.64
   1  -2   4 1485.85   47.87
  -2   1   4 1426.95   49.41
  -1   2   4 1454.60   59.38
  -1  -1   4 1390.54   50.43
   1  -2   4 1468.64   49.27
   1   1   4 1476.58   59.80
  -2   1   5 1407.09   53.98
  -1  -1   5 1311.56   54.03
   2  -1   5 1385.87   45.71
   1  -2   5 1408.01   52.39
   1  -2   5 1463.94   56.19
   2  -1   5 1505.68   63.04
   1  -2   5 1342.35   38.28
   1   1   5 1436.67   65.21
  -1  -1   5 1384.70   58.13
   2  -1   5 1382.59   44.93
  -1   2   5 1383.26   63.80
   1  -2   6   27.16    5.71
   1  -2   6   29.52    9.82
   1  -2   6   26.43    9.61
   2  -1   6   93.37   13.18
  -1   2   6   30.79   13.10
   2  -1   6   85.94   16.33
   2  -1   6   63.57   17.06
   1   1   6   27.41   11.08
  -1  -1   6   33.21   11.20
  -2   1   6   23.61    9.37
   2  -1   7  574.73   36.55
   2  -1   7  566.69   29.79
   1  -2   7  560.84   42.75
  -2   1   7  580.93   41.52
  -1  -1   7  603.51   42.78
  -1   2   7  591.67   48.29
   1  -2   7  521.46   23.94
   2  -1   7  644.09   49.94
   1  -2   7  602.05   40.82
   1   1   7  603.79   50.18
  -1   2   8  536.04   49.13
   1  -2   8  582.83   42.57
   1   1   8  537.47   50.37
   2  -1   8  524.80   28.52
  -1  -1   8  588.58   45.27
   1  -2   8  536.06   45.22
   2  -1   8  576.07   39.25
   1  -2   8  547.89   22.83
  -2   1   8  592.77   44.88
   2  -1   8  528.66   48.51
   2  -1   9  135.47   28.11
   1  -2   9   86.69   18.10
  -2   1   9   83.71   18.17
   2  -1   9   88.47   17.34
   1   1   9   58.50   20.20
  -1  -1   9   53.55   15.41
   1  -2   9   89.17   20.75
  -1   2   9   62.93   20.35
   1  -2   9   67.68    6.63
   2  -1  10  519.58   54.64
  -2   1  10  463.65   44.56
   1  -2  10  534.57   52.05
   1  -2  10  483.03   44.29
   2  -1  10  470.94   40.57
   1   1  10  445.75   51.59
  -1   2  10  384.48   46.72
  -1  -1  10  437.63   43.30
   2  -1  11   59.56   20.09
   2  -1  11   66.62   17.26
  -1  -1  11   68.63   19.06
   1  -2  11   73.68   21.93
   1  -2  11   55.55   18.75
   1   1  11   51.54   20.48
  -2   1  11   53.67   16.55
   2  -1  12   13.73   10.56
   2  -1  12   17.99   15.91
   1   1  12   14.26   12.77
   1  -2  12   15.16   11.69
  -1  -1  12   25.61   13.58
   2  -1  13   48.32   16.67
   1   1  13   56.12   25.63
  -1  -1  13   50.90   18.31
   1  -2  13   61.20   19.48
   2  -1  13   78.84   26.30
  -1  -1  14  127.40   28.79
   1  -2  14   93.93   25.02
   2  -1  14  110.36   31.95
   1   1  14   94.48   31.53
  -1  -1  15   36.27   18.23
   1  -2  15   24.16   14.83
  -2   2 -16   17.08   12.31
   2  -2 -16   19.18   15.99
   0  -2 -16   26.14   17.95
   2   0 -16    3.86   11.22
   2   0 -15   41.04   18.67
  -2   0 -15   55.99   19.70
  -2   2 -15   36.09   19.85
   0  -2 -15   39.00   17.99
   2  -2 -15   43.05   18.81
   0  -2 -14   37.02   17.17
  -2   0 -14   10.15    9.72
  -2   0 -14   35.69   20.39
   2  -2 -14   10.02   12.60
  -2   2 -14    5.06   11.60
   2   0 -14   31.62   16.93
  -2   0 -13   -0.64   14.51
   0  -2 -13   21.61   13.81
   0  -2 -13   29.53   13.65
   0   2 -13    7.10    9.51
  -2   2 -13   11.25   15.91
  -2   0 -13   19.62   12.14
   2  -2 -13   -5.00   13.02
  -2   2 -12  396.28   51.18
   0   2 -12  431.83   51.17
   0  -2 -12  423.06   49.17
  -2   0 -12  485.99   54.91
   0  -2 -12  450.55   48.56
  -2   0 -12  393.13   43.65
   2  -2 -12  389.46   49.81
   2  -2 -12  420.22   41.39
  -2   2 -11   -1.09    9.83
   0  -2 -11    9.61   11.12
   2  -2 -11   -7.23   10.76
  -2   0 -11   -8.18   10.98
   0   2 -11    8.95   11.39
   2  -2 -11    0.55    7.64
   2  -2 -10   86.95   23.75
   2  -2 -10   96.72   18.30
  -2   0 -10   78.46   11.44
   0  -2 -10   83.03   21.11
   0  -2 -10   72.41    8.89
  -2   2 -10   96.70   24.94
   0   2 -10   82.84   21.13
  -2   0  -9  424.71   27.77
   2  -2  -9  411.16   34.73
   0  -2  -9  367.09   22.65
   0  -2  -9  441.20   43.85
   2  -2  -9  366.78   43.23
  -2   2  -9  442.64   47.55
   0   2  -9  395.46   42.63
   0   2  -8   77.25   18.48
   0  -2  -8   97.85   20.02
  -2   2  -8   88.71   11.47
  -2   2  -8  118.91   24.18
   2  -2  -8   85.67   15.03
   2  -2  -8  106.95   21.96
  -2   0  -8   79.50   12.52
   0  -2  -8   84.82   11.57
   2  -2  -7  343.30   36.56
  -2   0  -7  284.36   22.95
   0   2  -7  288.21   32.86
   0  -2  -7  343.31   32.91
   0  -2  -7  329.64   22.73
  -2   2  -7  281.79   20.79
   2  -2  -7  328.81   25.92
   0  -2  -6  692.69   42.68
  -2   2  -6  755.65   37.95
  -2   0  -6  708.75   35.31
   2  -2  -6  759.24   49.62
  -2   0  -6  676.51   34.37
   2  -2  -6  659.91   21.79
  -2   2  -6  720.22   32.37
   0   2  -6  667.72   45.73
   0   2  -6  659.14   42.26
   0  -2  -6  709.19   33.46
   2  -2  -6  678.37   33.08
  -2   0  -5  646.99   32.66
   0   2  -5  607.43   36.17
  -2   2  -5  595.61   28.71
  -2   2  -5  582.79   30.29
   0  -2  -5  601.52   36.21
   2  -2  -5  566.32   39.19
  -2   0  -5  673.10   30.62
   0  -2  -5  610.29   33.24
   0   2  -5  595.70   40.15
   2   0  -5  559.54   39.31
   0  -2  -5  596.47   29.43
   2  -2  -5  551.80   21.39
   2  -2  -5  593.94   26.66
   0   2  -4  363.76   24.69
   2  -2  -4  348.89   29.85
   0  -2  -4  379.24   25.60
   0   2  -4  367.04   24.48
  -2   2  -4  403.48   22.29
   0   2  -4  404.93   30.27
   2  -2  -4  368.77   16.73
   2  -2  -4  391.58   26.78
  -2   0  -4  388.74   19.88
  -2   2  -4  391.45   22.69
   2   0  -4  426.14   28.55
   0  -2  -4  375.26   30.27
   2  -2  -4  398.34   30.00
   0  -2  -4  398.70   24.12
  -2   0  -4  369.34   23.92
   2  -2  -4  384.36   18.50
   2  -2  -3 5010.33   86.07
   2   0  -3 4559.11   63.61
  -2   0  -3 4934.94   84.72
   0   2  -3 4923.86   95.04
   0  -2  -3 4862.53   96.91
   0  -2  -3 4997.01   80.04
   0   2  -3 4820.82   73.80
   2  -2  -3 4840.36   92.65
   2  -2  -3 5018.03  101.04
  -2   0  -3 5049.92   56.74
   2  -2  -3 4902.63   67.47
  -2   2  -3 5023.66   67.30
   2   0  -3 5084.79   88.27
   0   2  -3 5008.28   81.75
  -2   2  -3 4909.35   78.85
  -2   0  -2 9940.36  115.65
   0   2  -2 9685.64   77.50
   2  -2  -2 9879.96  116.95
   2   0  -2 9744.05  106.81
  -2   2  -2 9766.47   79.86
   0  -2  -2 9717.33   95.31
   2   0  -2 9812.59   96.86
   2   0  -2 9853.50   90.43
   0   2  -2 9999.00  100.86
   2  -2  -2 9773.96   97.48
  -2   2  -2 9807.77  106.55
   2  -2  -1 2206.42   47.27
  -2   2  -1 2253.18   37.11
   2   0  -1 2287.56   39.79
   0  -2  -1 2265.66   38.77
   2   0  -1 2275.72   48.93
   0   2  -1 2272.54   41.37
  -2   0  -1 2275.69   53.06
  -2   2  -1 2178.91   49.05
   0  -2  -1 2313.41   40.87
   2   0  -1 2165.44   42.15
   2  -2  -1 2220.99   47.08
   2  -2   0 4083.33   53.44
   0   2   0 3825.61   48.10
   0   2   0 3971.42   57.84
   0  -2   0 4052.90   48.95
  -2   2   0 3917.85   54.90
   2   0   0 3922.70   41.90
  -2   0   0 4060.91   42.00
   2   0   1 2311.03   53.92
   2  -2   1 2313.63   36.52
  -2   2   1 2280.74   47.42
  -2   2   1 2341.77   50.06
   0  -2   1 2344.68   42.11
   0   2   1 2380.96   48.31
   0   2   1 2248.22   39.34
  -2   0   1 2320.63   48.56
  -2   0   1 2241.68   42.21
   2  -2   1 2310.53   50.82
  -2   0   1 2230.76   41.00
   0   2   1 2310.79   41.30
   2  -2   2 9519.39  107.14
   0  -2   2 9511.80  100.33
   0   2   2 9813.89  119.19
  -2   0   2 9813.83  106.26
  -2   0   2 9532.86   93.21
   0  -2   2 9479.95  121.11
   0   2   2 9836.76  100.36
  -2   2   2 9640.37  119.30
   2   0   2 9747.42  115.72
   2  -2   2 9625.43   80.63
   0  -2   3 4959.45   83.18
  -2   0   3 5084.54   87.50
   2   0   3 4892.11   84.97
   0  -2   3 5260.46  101.09
   2   0   3 5107.93   55.58
  -2   0   3 5045.43   62.46
   0   2   3 5065.33   99.90
   2  -2   3 5156.34   81.99
   0   2   3 5016.67   85.27
   2  -2   3 4917.23   69.94
   2   0   4  385.13   19.13
   0  -2   4  386.69   30.68
   2  -2   4  401.00   23.46
  -2   0   4  391.42   27.46
   0  -2   4  378.14   26.08
   2  -2   4  381.36   26.50
  -2   0   4  386.74   25.21
  -2   0   4  383.40   15.81
   2  -2   4  369.38   22.85
   2   0   4  363.71   23.83
   0   2   4  410.45   32.34
   2   0   5  612.75   42.82
   2  -2   5  580.02   36.78
   2  -2   5  639.73   33.43
  -2   0   5  625.46   35.97
   2   0   5  606.18   31.74
   2   0   5  601.33   28.13
  -2   0   5  571.89   36.36
   0   2   5  636.01   44.41
   0  -2   5  634.79   24.18
   2  -2   5  623.18   30.73
   0  -2   5  595.04   36.25
   2   0   6  620.69   31.93
   2  -2   6  665.09   32.44
   0   2   6  664.47   49.05
   0  -2   6  598.15   22.81
  -2   0   6  585.10   39.56
   2   0   6  671.88   48.23
   2   0   6  568.77   31.66
   2  -2   6  621.25   36.39
   2  -2   6  587.87   41.25
   0  -2   6  644.56   41.03
   2  -2   7  294.53   21.62
   0  -2   7  337.48   31.93
   2   0   7  302.10   35.34
   2  -2   7  266.99   30.73
  -2   0   7  344.73   33.72
   0  -2   7  306.97   15.09
   0   2   7  293.68   35.64
   2  -2   7  295.38   27.36
   2   0   7  285.64   24.43
   0   2   8   78.63   20.75
   2  -2   8   73.32   10.99
   2   0   8  102.81   16.11
   2  -2   8   89.44   16.91
  -2   0   8   89.22   18.17
   2  -2   8   78.86   18.81
   0  -2   8   76.61   16.49
   2   0   8  104.60   22.70
   0  -2   9  519.91   44.46
   2   0   9  396.47   33.97
   2  -2   9  387.00   42.87
  -2   0   9  405.17   41.53
   0   2   9  421.92   47.44
   2  -2   9  418.54   24.53
   2  -2   9  402.50   36.64
   2   0   9  445.03   48.83
  -2   0  10   86.04   19.68
   2   0  10  119.52   28.61
   0   2  10   85.12   23.85
   2  -2  10   87.96   19.09
   2  -2  10   74.04   20.98
   0  -2  10   47.02   15.44
   0   2  11   11.30   13.32
  -2   0  11   -0.30    8.84
   2   0  11   15.20   12.74
   2  -2  11    1.73    9.25
   2  -2  11   -2.34    8.71
   0  -2  11    0.48    8.41
   2   0  12  400.28   53.76
   2  -2  12  400.42   51.69
  -2   0  12  397.28   46.59
   0   2  12  450.73   57.56
   0  -2  12  440.54   47.97
   2  -2  12  435.25   44.84
   0  -2  13   18.34   13.90
   2  -2  13   15.28   16.84
   2   0  13   39.53   22.57
   2  -2  13   17.78   12.39
   0   2  13    7.89   13.73
  -2   0  13   20.76   12.46
   0  -2  14   49.73   18.96
   2  -2  14   47.37   17.91
   2   0  14   25.74   17.55
   2   0  15   25.43   20.15
   0  -2  15   20.72   15.97
   2  -2  15   42.55   17.29
   0  -2  16   18.49   13.59
   1  -3 -17    0.12   10.85
   3  -2 -16   -7.36   13.01
   2   1 -16    6.13    8.71
   1  -3 -16   35.77   19.19
  -3   2 -16   38.44   20.90
  -3   2 -15   -6.47    9.19
   3  -2 -15  -10.00   12.58
  -3   2 -15   -0.69   11.01
   1  -3 -15    9.02   12.21
   3  -2 -14   39.42   18.44
   1  -3 -14   18.77   14.12
  -3   2 -14   16.32   14.25
  -2  -1 -14   16.24   13.84
  -2  -1 -14   16.13   10.45
  -1   3 -14   -5.82   11.67
  -2  -1 -13  112.04   26.11
   1  -3 -13  127.17   29.57
  -3   2 -13  155.06   34.39
  -1   3 -13  143.03   33.26
   3  -2 -13  129.02   32.31
   1  -3 -12   52.33   15.79
   3  -2 -12   21.33   15.50
  -3   2 -12   26.01   17.12
  -2  -1 -12   61.32   18.87
  -1   3 -12   49.48   20.03
   1  -3 -12   66.31   21.02
  -2  -1 -11  151.25   27.10
  -1   3 -11  188.01   35.08
   1  -3 -11  191.10   34.03
   1  -3 -11  174.94   27.00
  -3   2 -11  180.76   34.54
   3  -2 -11  174.71   33.45
   3  -2 -10    5.55   10.65
  -1   3 -10   14.92   10.49
   1  -3 -10   20.03   11.51
  -3   2 -10    7.82    4.97
   1  -3 -10    1.39    1.83
  -2  -1 -10    7.38    5.55
  -2  -1 -10    8.12    6.99
  -1   3  -9    8.47    9.53
   1  -3  -9   12.58    4.93
  -2  -1  -9   11.96    6.16
  -2  -1  -9   13.50    8.80
  -3   2  -9   27.51    8.29
   3  -2  -9   24.21   13.35
   1  -3  -8    8.73    9.91
  -2  -1  -8   -0.49    4.30
   1  -3  -8   16.38    5.84
  -3   2  -8    0.18    4.78
  -1   3  -8    5.22   10.56
   3  -2  -8   -8.09   10.34
  -2  -1  -8   -2.04    7.70
  -1   3  -7  138.73   24.42
   3  -2  -7  110.51    8.24
   3  -2  -7  114.02   23.59
  -2  -1  -7  128.43   17.53
   1  -3  -7  107.50   20.36
  -3   2  -7  122.82   16.10
  -2  -1  -7  107.16   15.38
  -2  -1  -7  129.91   18.87
  -2  -1  -6  643.91   37.15
   1  -3  -6  697.51   44.60
  -3   2  -6  704.39   37.16
  -2  -1  -6  683.24   34.68
  -3   2  -6  689.01   33.82
  -2  -1  -6  740.12   39.86
  -1   3  -6  752.97   52.21
   3  -2  -6  642.00   24.11
   3  -2  -6  639.85   47.90
  -3   2  -5  703.08   30.35
   3  -2  -5  676.55   45.02
   3  -2  -5  697.64   27.17
   1  -3  -5  696.67   40.53
  -2  -1  -5  748.43   32.16
  -1   3  -5  646.01   45.19
  -2  -1  -5  763.22   39.56
   2   1  -5  800.60   47.05
  -2  -1  -5  721.42   34.24
  -3   2  -5  735.71   37.20
  -3   2  -4 1259.08   47.29
   2   1  -4 1310.93   50.96
  -1   3  -4 1316.92   58.84
  -2  -1  -4 1282.68   49.99
  -2  -1  -4 1206.29   36.76
   1  -3  -4 1286.24   58.52
  -1   3  -4 1262.48   45.03
   3  -2  -4 1379.06   53.21
  -2  -1  -4 1257.60   35.72
   3  -2  -4 1178.63   37.05
   3  -2  -4 1278.35   56.54
  -3   2  -4 1231.98   34.99
   1  -3  -4 1248.05   49.84
  -1   3  -3  553.31   35.62
  -3   2  -3  534.89   19.57
   2   1  -3  557.64   30.11
  -2  -1  -3  598.24   33.22
   1  -3  -3  628.74   37.17
  -1   3  -3  538.54   26.54
  -3   2  -3  575.77   31.85
   1  -3  -3  542.19   29.71
   3  -2  -3  577.24   31.32
   3  -2  -3  559.15   34.00
  -2  -1  -3  572.84   20.03
   3  -2  -3  549.15   26.13
  -1   3  -2 5639.81  102.53
   2   1  -2 5603.83   84.10
   1  -3  -2 5602.38   64.72
   3  -2  -2 5748.44   96.06
  -2  -1  -2 5791.16   45.19
  -2  -1  -2 5796.79  100.26
   3  -2  -2 5661.78   86.26
   1  -3  -2 5725.38   98.07
   1  -3  -2 5872.58   86.59
   2   1  -2 5548.16   84.38
  -3   2  -2 5726.34   96.76
   3  -2  -2 6040.07   89.49
  -1   3  -2 5769.90   78.69
  -3   2  -2 5760.15   59.55
  -2  -1  -1 1790.88   26.54
   1  -3  -1 1687.23   44.55
  -2  -1  -1 1854.06   55.04
   3  -2  -1 1706.86   45.72
  -1   3  -1 1783.17   40.41
  -3   2  -1 1763.56   52.19
  -3   2  -1 1704.28   34.69
   2   1  -1 1781.88   43.47
   2   1  -1 1772.79   40.88
   1  -3  -1 1767.72   42.42
   3  -2  -1 1677.19   48.43
  -3   2   0 4599.77   65.96
   1  -3   0 4706.90   54.53
   1  -3   0 4929.97   65.68
   2   1   0 4724.05   85.10
  -2  -1   0 4717.85   85.08
   2   1   0 4682.78   53.26
  -3   2   0 4795.43   83.10
  -2  -1   0 4788.91   71.54
  -1   3   0 4976.70   53.91
  -2  -1   0 4828.56   55.52
   3  -2   0 4720.33   64.15
  -1   3   0 4875.11   66.97
   3  -2   0 4861.30   84.70
  -1   3   1 1748.57   38.01
  -3   2   1 1641.20   46.46
  -2  -1   1 1628.09   39.64
   2   1   1 1681.88   23.24
  -2  -1   1 1689.14   44.92
   1  -3   1 1634.25   49.89
   3  -2   1 1593.68   50.17
  -1   3   1 1671.29   43.45
  -2  -1   1 1772.89   50.80
  -1   3   1 1662.90   43.38
   2   1   1 1647.73   51.86
   1  -3   1 1697.91   40.05
  -3   2   1 1704.27   47.30
   3  -2   1 1669.89   32.25
   2   1   2 5955.17   53.04
  -3   2   2 5815.17   85.83
   1  -3   2 6133.67   82.82
   2   1   2 5995.96  101.60
  -3   2   2 6027.77  102.04
  -1   3   2 6213.64  100.48
   3  -2   2 6216.37  101.98
  -2  -1   2 6110.87   90.65
  -3   2   2 5999.53   48.60
   3  -2   2 6117.01   57.48
   1  -3   2 6160.94  109.00
  -2  -1   2 6159.67   90.12
  -1   3   2 6138.68   93.12
   3  -2   3  563.89   21.52
   1  -3   3  516.94   27.13
  -1   3   3  504.57   33.33
   1  -3   3  533.97   21.64
  -1   3   3  484.02   29.73
   3  -2   3  495.07   29.76
   2   1   3  514.61   30.56
  -2  -1   3  528.99   25.71
  -3   2   3  514.71   24.66
  -2  -1   3  504.18   29.39
   1  -3   3  482.07   33.65
   1  -3   4 1359.59   43.86
  -1   3   4 1287.97   53.54
  -3   2   4 1334.36   38.71
  -1   3   4 1178.66   55.71
  -2  -1   4 1238.76   37.20
   3  -2   4 1282.17   49.72
   3  -2   4 1227.57   37.52
  -2  -1   4 1319.38   52.22
  -2  -1   4 1328.47   52.34
   1  -3   4 1263.31   42.82
   1  -3   4 1285.06   47.41
  -1   3   5  780.64   50.11
   1  -3   5  856.11   35.26
  -2  -1   5  783.32   44.00
   1  -3   5  823.11   42.11
  -2  -1   5  744.40   26.48
   2   1   5  783.04   50.71
   1  -3   5  805.39   39.46
  -2  -1   5  793.79   44.36
   3  -2   5  783.90   34.62
   3  -2   5  838.90   40.97
   2   1   6  679.99   51.05
  -2  -1   6  620.08   21.13
  -2  -1   6  630.49   42.47
  -1   3   6  585.55   46.49
   1  -3   6  631.60   40.21
   1  -3   6  639.57   40.15
   3  -2   6  683.43   46.62
   3  -2   6  608.61   33.98
   3  -2   6  673.85   37.54
   1  -3   6  639.22   30.62
   1  -3   7   82.90   16.90
   3  -2   7   85.52   18.44
   3  -2   7  110.89   15.93
   3  -2   7  102.15   15.18
   1  -3   7   84.25   16.73
   2   1   7   93.81   22.25
   1  -3   7   91.75   11.77
  -2  -1   7   79.03   17.10
  -1   3   7   92.63   21.32
  -2  -1   8    4.25    8.49
   1  -3   8    2.87    7.59
   3  -2   8    5.97    7.48
   3  -2   8    0.19    4.31
   3  -2   8    2.41    6.19
   1  -3   8    2.27    7.57
   1  -3   8    2.32    2.69
  -1   3   8    2.00    7.43
   2   1   8   -0.27    8.81
   3  -2   9   10.37    8.60
   3  -2   9   16.86    8.19
   1  -3   9   30.08   13.12
   1  -3   9   30.10    6.17
   3  -2   9   19.70    6.57
  -1   3   9   17.17   15.16
  -2  -1   9   40.62   14.31
   2   1   9   17.89   14.52
   1  -3   9   16.60    9.58
  -1   3  10   11.89   13.69
   1  -3  10    1.95    8.73
  -2  -1  10   -0.92   11.86
   2   1  10    3.03   13.93
   3  -2  10   -4.36    8.35
   3  -2  10   18.75   13.46
  -2  -1  11  173.99   30.83
   1  -3  11  152.96   28.14
   2   1  11  143.80   33.87
   3  -2  11  180.63   27.06
   3  -2  11  167.00   33.06
  -1   3  11  170.23   34.92
   1  -3  12   50.45   17.78
   3  -2  12   64.09   17.92
   2   1  12   50.29   21.87
  -2  -1  12   90.19   24.01
   3  -2  12   56.84   21.39
  -2  -1  13  127.08   28.69
   2   1  13  103.59   30.37
   3  -2  13  110.25   30.07
   3  -2  13  120.26   24.73
   1  -3  13   94.69   24.19
   2   1  14   36.19   21.32
  -2  -1  14   21.03   14.98
   1  -3  14   61.67   21.55
   3  -2  14   46.23   22.91
   3  -2  14   51.96   17.10
   3  -2  15   -4.89   12.15
   1  -3  15    0.05    8.70
  -2  -1  15    1.06    8.83
   2   1  15  -26.98   18.99
   1  -3  16   43.74   16.91
   2   1  16   19.77   22.43
   1  -3  17   -0.85    6.92
   2  -3 -16   -7.64   12.04
  -2   3 -16    5.10   11.84
   3  -1 -16  -21.94   15.96
   2  -3 -15   29.15   19.51
  -1  -2 -15   23.78   15.30
  -2   3 -15   50.00   23.70
  -3   1 -15   28.65   18.75
   3  -1 -15    1.11   10.10
  -2   3 -14   71.44   24.90
   3  -1 -14   48.11   20.45
  -3   1 -14   47.33   22.51
  -3   1 -14   28.47   13.90
  -1  -2 -14   31.00   15.11
   2  -3 -14   58.50   21.74
   2  -3 -13   70.89   23.29
  -1  -2 -13   58.45   20.30
  -3   1 -13   71.05   19.18
  -1  -2 -13  135.80   29.89
  -3   1 -13   73.87   24.82
  -2   3 -13   82.24   24.72
   3  -1 -13   80.18   25.88
   3  -1 -12  113.51   29.92
  -2   3 -12  160.64   33.96
  -1  -2 -12  101.93   24.03
   2  -3 -12   98.07   26.55
   2  -3 -11  161.88   23.83
   2  -3 -11  129.78   28.83
   3  -1 -11  187.31   34.96
  -1  -2 -11  153.11   29.15
  -2   3 -11  179.42   34.71
  -1  -2 -10   42.53   15.92
   2  -3 -10   40.39   12.08
  -2   3 -10   59.38   21.67
  -3   1 -10   39.24    9.53
   2  -3 -10   60.27   20.49
  -1  -2 -10   55.33   10.71
   2  -3  -9   14.03    3.53
  -3   1  -9    0.26    3.38
   2  -3  -9   13.11    7.25
  -2   3  -9   24.62   13.31
  -1  -2  -9   16.83    6.46
  -1  -2  -9   19.81    9.92
   2  -3  -9    3.49   11.02
   2  -3  -9   12.48    3.55
   2  -3  -8  270.27   18.25
   2  -3  -8  262.46   16.96
  -1  -2  -8  260.13   23.76
  -2   3  -8  293.69   38.31
   2  -3  -8  256.37   24.59
   2  -3  -8  289.08   35.63
  -1  -2  -8  278.20   30.95
  -3   1  -8  249.90   23.72
  -3   1  -7  689.00   38.81
   2  -3  -7  653.17   28.20
  -2   3  -7  667.46   53.92
  -1  -2  -7  649.23   43.16
   2  -3  -7  793.78   53.71
  -3   1  -7  680.64   36.08
  -1  -2  -7  699.32   38.85
   2  -3  -6  219.28   26.54
   3  -1  -6  186.49   11.32
  -1  -2  -6  203.47   22.02
  -1  -2  -6  166.89   18.32
  -2   3  -6  224.95   29.95
  -3   1  -6  140.82   17.49
  -3   1  -6  171.98   16.45
  -1  -2  -6  215.43   21.35
  -1  -2  -5 1368.28   49.77
  -3   1  -5 1258.34   50.03
   3  -1  -5 1243.45   34.28
  -3   1  -5 1305.37   39.13
  -2   3  -5 1186.88   62.70
   2  -3  -5 1201.87   56.48
  -1  -2  -5 1205.52   48.74
  -2   3  -5 1263.13   46.57
   1   2  -5 1282.79   53.36
  -1  -2  -5 1295.04   45.50
   2  -3  -4 1732.16   68.78
  -3   1  -4 1770.64   38.25
   3  -1  -4 1740.74   60.15
   1   2  -4 1803.68   56.22
  -2   3  -4 1864.31   51.08
  -1  -2  -4 1767.08   57.33
  -3   1  -4 1746.79   59.04
   3  -1  -4 1644.71   42.88
   1   2  -4 1852.78   58.93
   2  -3  -4 1652.40   60.38
  -2   3  -4 1757.57   70.32
  -1  -2  -4 1823.81   50.53
  -3   1  -3 3584.18   40.83
  -3   1  -3 3685.89   81.73
  -2   3  -3 3665.62   64.32
   2  -3  -3 3597.62   89.10
   2  -3  -3 3573.50   80.88
  -2   3  -3 3506.78   91.43
   3  -1  -3 3556.71   53.06
  -1  -2  -3 3636.25   61.53
   3  -1  -3 3707.33   79.44
   1   2  -3 3586.85   74.76
   3  -1  -3 3633.42   66.17
   1   2  -2 5859.19   84.77
  -2   3  -2 5552.76  103.11
   3  -1  -2 5729.70   86.91
  -1  -2  -2 5603.02   64.29
   2  -3  -2 5774.46   98.53
  -2   3  -2 5760.32   74.88
   3  -1  -2 5689.33   87.28
  -3   1  -2 5622.04   97.98
   2  -3  -2 5880.36   93.69
  -3   1  -2 5670.52   41.65
  -2   3  -1 1921.23   54.06
   3  -1  -1 1930.84   52.60
   1   2  -1 1996.18   49.90
  -1  -2  -1 1983.85   46.07
   1   2  -1 1910.32   41.90
  -3   1  -1 2009.58   56.49
   3  -1  -1 1889.60   47.37
  -3   1  -1 1906.03   29.46
  -2   3  -1 1972.02   42.07
   3  -1  -1 1928.18   43.36
   2  -3  -1 1885.30   38.41
   2  -3  -1 1931.98   47.83
  -1  -2  -1 1994.29   34.22
   2  -3   0 4120.31   69.08
  -3   1   0 3945.58   56.31
   3  -1   0 4083.06   50.38
   3  -1   0 4227.13   80.28
   1   2   0 4135.19   66.10
   2  -3   0 4032.27   61.71
   1   2   0 4069.23   51.88
  -1  -2   0 4101.72   68.97
  -3   1   0 4172.85   78.41
  -1  -2   0 4152.47   54.71
   3  -1   0 4082.86   55.57
   2  -3   0 4237.60   76.94
  -2   3   0 4135.07   68.06
  -2   3   0 4175.17   65.23
  -3   1   1 1960.43   52.22
   3  -1   1 2007.23   27.07
   1   2   1 1984.95   36.15
   2  -3   1 2103.81   54.70
   3  -1   1 1889.85   55.79
  -2   3   1 2078.68   50.64
  -1  -2   1 1946.43   43.58
  -3   1   1 2121.24   43.75
   2  -3   1 2035.51   42.34
   2  -3   2 5839.84   92.56
   1   2   2 5731.01   70.69
  -3   1   2 5800.97   68.09
   2  -3   2 5769.81   74.76
  -3   1   2 5843.74   86.28
  -3   1   2 5788.10   84.86
   3  -1   2 6147.41  103.50
  -1  -2   2 5810.30   85.65
  -2   3   2 5809.05   96.09
   3  -1   3 3840.72   45.28
  -2   3   3 3809.75   87.39
  -3   1   3 3709.46   65.27
  -3   1   3 3721.35   76.85
   1   2   3 3521.58   65.65
   3  -1   3 3760.58   83.48
   2  -3   3 3665.14   74.79
  -1  -2   3 3704.14   77.32
   2  -3   3 3697.12   67.61
  -1  -2   3 3720.04   86.35
   2  -3   4 1766.74   53.32
  -3   1   4 1884.19   49.47
   3  -1   4 1859.35   60.69
  -1  -2   4 1707.65   58.88
   3  -1   4 1727.23   39.05
  -3   1   4 1748.79   42.12
  -1  -2   4 1818.50   66.19
  -3   1   4 1820.70   59.97
   2  -3   4 1728.53   52.42
   2  -3   4 1848.37   53.47
   1   2   4 1882.23   71.87
  -2   3   4 1722.23   64.98
  -3   1   5 1228.62   45.55
  -3   1   5 1178.29   52.49
  -1  -2   5 1137.98   52.61
   2  -3   5 1097.25   47.73
   2  -3   5 1245.20   49.25
  -1  -2   5 1191.24   58.66
   2  -3   5 1132.73   43.59
  -3   1   5 1118.72   30.60
   1   2   5 1120.46   60.95
  -2   3   5 1090.30   58.85
   3  -1   5 1120.69   37.28
   3  -1   5 1090.46   47.09
  -2   3   6  177.31   26.82
  -3   1   6  192.14   23.42
  -1  -2   6  162.26   22.38
   2  -3   6  172.55   20.64
   3  -1   6  186.25   20.19
   3  -1   6  167.73   26.24
   1   2   6  154.35   25.07
   2  -3   6  175.91   22.43
   3  -1   6  207.55   18.30
   2  -3   6  181.22   17.91
   2  -3   7  648.95   34.15
   2  -3   7  648.26   42.50
  -3   1   7  688.59   46.26
  -1  -2   7  744.99   49.08
  -1  -2   7  680.49   23.26
   3  -1   7  680.77   36.76
   1   2   7  676.87   55.34
   2  -3   7  716.21   47.89
   3  -1   7  669.93   38.48
   3  -1   7  751.68   55.02
  -1  -2   7  686.02   22.63
   2  -3   8  294.19   31.04
   2  -3   8  264.00   21.73
   3  -1   8  244.49   33.79
   2  -3   8  247.19   31.42
   3  -1   8  281.92   25.73
  -1  -2   8  309.47   34.23
   1   2   8  251.68   36.43
   3  -1   8  256.08   24.03
  -3   1   8  294.65   32.64
  -1  -2   9   16.44    8.49
   2  -3   9   13.89    5.22
   3  -1   9   16.66    8.74
   2  -3   9   12.90    8.78
  -3   1   9    2.14   10.68
   3  -1   9   16.36    6.69
   1   2   9   19.51   12.21
   3  -1   9    4.71   10.52
   2  -3   9   13.45    9.00
  -3   1  10   57.09   17.37
   2  -3  10   37.73   15.71
   1   2  10   35.07   20.17
   2  -3  10   45.47   15.59
   3  -1  10   44.89   12.47
  -1  -2  10   37.70   12.86
   3  -1  10   23.32   14.39
   3  -1  11  150.00   24.18
   2  -3  11  146.67   30.24
  -1  -2  11  177.60   30.25
   1   2  11  183.87   37.81
  -3   1  11  203.63   32.20
   3  -1  11  134.66   31.19
   2  -3  11  159.58   27.04
   1   2  12  129.12   33.91
  -1  -2  12   85.73   22.72
   2  -3  12  139.11   27.10
   2  -3  12  101.20   26.71
   3  -1  12  158.81   35.47
   1   2  13  109.64   30.33
  -1  -2  13  109.69   27.27
   2  -3  13   85.19   21.51
   3  -1  13   91.27   27.71
   3  -1  14   28.44   21.57
  -1  -2  14   44.11   19.25
   2  -3  14   34.85   16.79
   1   2  14   43.55   22.42
   3  -1  15    5.45   15.20
  -1  -2  15   18.41   13.87
   1   2  15   48.55   24.81
   2  -3  15   19.07   13.45
   2  -3  16   13.87   16.15
  -1  -2  16   -3.52    8.17
   3  -1  16   11.64   10.47
   0  -3 -16  -24.53   14.59
   3   0 -16    3.03    8.41
   3  -3 -16   16.05   16.40
  -3   3 -16   -2.93   12.43
   3   0 -15   16.78   14.25
  -3   3 -15   15.40   14.54
   0  -3 -15   34.33   18.11
  -3   0 -15   31.04   18.61
   3  -3 -15   35.55   18.21
   3   0 -14   53.44   22.97
   0  -3 -14   71.94   22.94
  -3   3 -14   72.76   28.62
   3  -3 -14   48.92   22.48
  -3   0 -14   66.05   19.79
  -3   0 -14   33.17   19.93
   0  -3 -13    9.30   13.07
   3  -3 -13    2.41   12.85
  -3   3 -13    3.44   10.63
  -3   0 -13   15.44    9.21
  -3   0 -12   52.84   16.76
   3  -3 -12   98.53   27.88
   0  -3 -12   84.49   22.71
  -3   3 -12   58.23   22.98
   0  -3 -11  100.16   24.99
  -3   0 -11  107.29   21.57
  -3   3 -11  108.99   28.03
  -3   3 -10   30.46   15.39
   0  -3 -10   37.60    8.95
   0  -3 -10   25.40   13.68
   3  -3 -10   25.65    9.36
  -3   0 -10   13.10    9.52
   3  -3 -10   40.62   16.59
   0   3 -10   20.02   12.22
  -3   0 -10   21.40    8.26
   3  -3  -9  269.79   38.01
  -3   0  -9  255.23   25.99
   3  -3  -9  285.66   25.30
  -3   3  -9  219.04   35.58
   0  -3  -9  266.18   33.81
   0   3  -9  336.93   40.67
  -3   0  -9  238.55   28.64
   0  -3  -9  265.07   24.31
   0  -3  -8  461.09   40.35
  -3   3  -8  432.22   47.69
   3  -3  -8  445.67   45.77
   0  -3  -8  459.03   32.13
  -3   3  -8  459.86   31.13
   0   3  -8  463.33   45.49
   3  -3  -8  443.73   20.59
   3  -3  -8  497.12   29.87
  -3   0  -8  463.18   34.42
  -3   3  -7  257.69   23.34
   0  -3  -7  268.96   24.70
   0  -3  -7  286.44   29.64
   0   3  -7  275.16   32.84
   3  -3  -7  244.82   17.06
   3  -3  -7  291.51   20.36
   3  -3  -7  266.35   32.82
  -3   0  -7  261.45   22.20
  -3   0  -7  267.69   26.07
   0   3  -6  126.72   17.88
   3  -3  -6  151.42   14.16
  -3   0  -6  166.48   15.89
   0  -3  -6  164.57   20.97
  -3   0  -6  148.11   19.29
   0   3  -6  177.09   25.69
   0  -3  -6  184.23   20.14
   3  -3  -6  152.14   23.76
  -3   3  -6  189.84   19.92
  -3   3  -5  594.50   29.97
   3  -3  -5  575.55   28.08
  -3   0  -5  601.27   25.92
   3  -3  -5  585.45   41.66
  -3   3  -5  594.68   33.84
  -3   0  -5  603.06   37.24
   0  -3  -5  615.42   36.11
   0   3  -5  593.40   34.43
  -3   0  -4 1089.62   28.95
   0   3  -4 1119.40   40.69
   3   0  -4 1205.19   39.35
   0  -3  -4 1201.91   45.86
  -3   3  -4 1225.95   38.44
   3  -3  -4 1083.84   52.10
  -3   0  -4 1096.18   48.87
   3  -3  -4 1106.44   39.74
  -3   3  -4 1136.84   45.97
  -3   0  -3 2948.12   77.72
  -3   0  -3 2778.68   35.72
  -3   3  -3 2948.62   53.57
   3  -3  -3 2960.30   78.16
   3   0  -3 2838.07   63.74
  -3   3  -3 2931.72   71.99
   3   0  -3 2905.27   59.80
   0  -3  -3 3107.09   65.62
  -3   3  -3 2949.18   55.93
   3   0  -3 2913.46   71.81
   0   3  -3 3100.67   68.47
   0   3  -3 2795.68   51.54
   3  -3  -3 2801.56   63.96
   3   0  -2  274.86   17.15
  -3   3  -2  261.13   21.28
   0   3  -2  280.96   18.57
   3  -3  -2  299.19   23.06
   0  -3  -2  302.40   19.41
   0  -3  -2  265.77   17.11
   3   0  -2  273.37   20.83
   3  -3  -2  267.06   20.07
  -3   0  -2  307.09   25.00
   3   0  -2  301.48   20.46
  -3   3  -2  286.21   16.39
  -3   3  -1 1579.92   39.19
   0  -3  -1 1638.25   38.49
   3  -3  -1 1554.58   45.95
   3  -3  -1 1603.51   49.30
   3   0  -1 1451.77   48.82
  -3   3  -1 1459.40   49.20
   0   3  -1 1545.00   39.87
   3   0  -1 1580.19   40.52
  -3   0  -1 1529.79   52.79
   0  -3  -1 1523.41   42.60
   3   0   0 1477.31   50.33
  -3   3   0 1599.04   43.03
   0   3   0 1519.68   43.98
  -3   3   0 1563.08   49.81
   3  -3   0 1512.28   40.45
  -3   0   0 1594.45   52.27
   3  -3   0 1571.76   49.71
   3   0   0 1505.51   31.54
   0  -3   0 1507.39   36.77
  -3   0   0 1509.63   31.72
   0   3   0 1502.00   36.80
  -3   3   1 1362.59   44.51
  -3   3   1 1390.22   46.00
   3  -3   1 1451.81   49.04
   3  -3   1 1359.61   35.28
  -3   0   1 1349.52   38.51
   0   3   1 1430.84   42.61
   0   3   1 1338.11   37.89
   0   3   1 1343.76   37.22
   0  -3   1 1390.37   38.68
  -3   0   1 1315.90   45.66
   3   0   1 1379.39   50.12
  -3   0   1 1429.57   38.31
   3  -3   2  275.14   21.91
  -3   3   2  214.72   19.99
   0   3   2  229.03   20.46
   3  -3   2  239.20   14.66
  -3   0   2  254.03   17.78
  -3   0   2  239.24   18.30
   3   0   2  233.91   21.38
   0  -3   2  235.52   17.68
  -3   0   2  227.11   18.81
   0   3   2  269.50   18.55
  -3   3   2  250.81   19.43
   0  -3   3 2827.98   67.56
   0   3   3 2925.03   68.20
   0   3   3 2869.29   81.23
   3   0   3 2946.09   77.56
  -3   0   3 2934.83   71.28
  -3   0   3 2675.84   60.51
   0  -3   3 2719.82   80.00
   3  -3   3 2918.85   73.18
   3  -3   3 2848.42   55.36
  -3   3   3 2927.88   81.04
   3  -3   4 1139.29   47.35
   0   3   4 1146.21   47.96
  -3   0   4 1161.78   49.93
   3   0   4 1176.88   50.36
   0  -3   4 1135.27   56.11
   0  -3   4 1155.68   47.75
   3  -3   4 1254.59   41.41
  -3   0   4 1098.54   36.95
   0   3   4 1295.61   61.10
   3  -3   5  639.16   33.23
  -3   0   5  622.89   39.77
   0  -3   5  658.54   39.51
  -3   0   5  640.59   37.22
   3  -3   5  627.22   35.88
   0   3   5  612.98   38.25
   3   0   5  618.24   37.26
   0   3   5  677.74   48.74
  -3   0   5  625.48   26.39
   3  -3   6  193.01   20.62
  -3   0   6  190.53   24.55
   3   0   6  204.24   28.78
  -3   0   6  183.81   12.49
  -3   0   6  171.53   21.33
   0  -3   6  195.89   24.71
   3   0   6  164.72   19.67
   3  -3   6  215.68   21.78
   0  -3   6  175.76   15.86
   3  -3   6  173.11   22.79
   0   3   6  165.13   26.23
   0  -3   7  317.01   20.42
  -3   0   7  318.37   33.24
   0  -3   7  374.22   35.31
   3  -3   7  322.49   26.99
   3  -3   7  248.23   25.16
   0   3   7  333.04   38.86
   3   0   7  284.08   35.59
   3   0   7  241.61   24.21
   3  -3   7  301.78   32.75
   3   0   8  441.80   47.50
   3  -3   8  423.29   31.16
   0   3   8  440.37   48.14
   0  -3   8  468.08   41.84
   3  -3   8  435.49   35.86
  -3   0   8  434.06   40.20
   0  -3   8  400.93   21.50
   3  -3   8  413.45   41.66
   0  -3   9  301.92   35.46
  -3   0   9  285.90   35.20
   3  -3   9  283.97   31.16
   0   3   9  252.92   39.53
   0  -3   9  238.06   13.90
   3  -3   9  262.51   35.65
   3   0   9  302.65   42.20
   3  -3   9  216.30   22.19
  -3   0  10   37.41   16.01
   3  -3  10   34.84   11.45
   3  -3  10   24.81   13.33
   0   3  10   70.16   24.15
   3   0  10   42.38   18.16
   0  -3  10   47.19   18.88
  -3   0  11  174.70   30.35
   3  -3  11  149.13   31.22
   0   3  11  136.93   31.95
   0  -3  11  113.62   25.08
   3  -3  11  166.64   26.65
   3   0  11  179.88   36.61
   3  -3  12   89.09   21.59
   3   0  12  116.31   30.66
  -3   0  12   41.43   17.86
   0   3  12   38.86   19.36
   0  -3  12   85.02   23.51
   3  -3  12   69.84   23.11
   3  -3  13   32.56   14.37
  -3   0  13    6.28   10.15
   0  -3  13   14.76   12.98
   3  -3  13   21.29   15.04
   0   3  13   59.70   23.85
   3   0  13   12.73   14.33
   3  -3  14   70.48   20.56
  -3   0  14   87.87   25.12
   3   0  14   41.76   22.46
   3  -3  14   49.87   21.48
   0  -3  14   51.90   21.35
   3  -3  15   41.37   17.38
   0  -3  15   15.03   13.96
   3   0  15   61.46   26.91
   0  -3  16   -1.60    8.46
   3   0  16    7.87   15.02
   1  -4 -16  -11.15   14.70
  -4   3 -16   14.60   17.17
   4  -3 -16   26.15   18.59
   1  -4 -15    4.17   10.60
  -4   3 -15   -9.82   14.79
   4  -3 -15   20.69   15.14
   1  -4 -14   25.27   16.65
   4  -3 -14  -13.04   14.41
  -4   3 -14   50.06   23.14
  -3  -1 -13   23.47   12.41
   4  -3 -13   30.16   18.94
  -4   3 -13   15.75   16.19
   1  -4 -13   10.89   13.23
  -3  -1 -12   97.21   21.60
  -1   4 -12  150.60   33.01
   4  -3 -12   81.52   26.20
   1  -4 -12   80.61   23.23
  -4   3 -12  125.36   30.91
  -1   4 -11  126.83   28.55
   4  -3 -11  107.42   29.47
  -4   3 -11  117.09   29.96
   1  -4 -11  116.73   26.16
  -3  -1 -11  119.86   23.43
   4  -3 -10  375.40   48.10
  -3  -1 -10  334.67   32.16
   1  -4 -10  280.07   37.65
   1  -4 -10  294.65   25.16
  -4   3 -10  298.06   27.62
  -1   4 -10  384.48   47.75
  -3  -1 -10  319.20   35.48
  -4   3  -9    3.54    5.17
   4  -3  -9   -2.58   10.83
   1  -4  -9   -5.78   12.37
  -3  -1  -9    7.57    9.13
   1  -4  -9    8.81    5.65
  -3  -1  -9    4.27    6.32
  -1   4  -9    1.13    9.99
   4  -3  -8  547.85   24.60
   4  -3  -8  612.84   55.27
  -3  -1  -8  604.98   42.83
  -3  -1  -8  639.20   42.45
  -4   3  -8  604.58   39.69
  -1   4  -8  596.42   54.16
   1  -4  -8  556.80   37.26
   1  -4  -8  661.77   50.14
  -3  -1  -7  813.10   42.59
   4  -3  -7  750.37   32.47
  -1   4  -7  753.57   57.75
   1  -4  -7  797.36   51.00
   4  -3  -7  829.27   60.25
  -3  -1  -7  744.02   46.64
  -4   3  -7  759.82   44.00
  -3  -1  -7  795.72   39.00
   1  -4  -6  563.70   40.12
  -3  -1  -6  556.00   29.04
  -1   4  -6  624.24   49.76
  -3  -1  -6  661.31   43.35
  -4   3  -6  556.53   37.13
   4  -3  -6  561.78   46.12
   4  -3  -6  585.30   30.33
  -3  -1  -6  637.84   33.23
  -4   3  -6  609.29   31.24
   4  -3  -6  599.97   20.86
  -3  -1  -5 2170.44   51.59
  -3  -1  -5 2279.11   77.72
  -1   4  -5 2176.37   86.16
   4  -3  -5 2216.26   84.98
   4  -3  -5 2145.74   29.76
  -3  -1  -5 2206.20   50.44
   1  -4  -5 2326.96   74.83
  -4   3  -5 2215.60   72.82
   4  -3  -5 2207.80   60.46
  -4   3  -5 2282.93   53.75
   4  -3  -4 1574.79   66.09
  -3  -1  -4 1658.58   36.70
  -4   3  -4 1706.93   41.85
  -4   3  -4 1642.03   43.44
  -3  -1  -4 1686.30   65.93
  -1   4  -4 1659.95   71.24
   1  -4  -4 1627.16   42.92
   1  -4  -4 1600.98   58.00
  -3  -1  -4 1632.68   35.84
   4  -3  -4 1574.64   52.38
  -4   3  -4 1647.42   61.70
  -3  -1  -3 2821.83   33.64
   3   1  -3 2804.86   68.05
   1  -4  -3 2770.74   81.15
  -4   3  -3 2886.11   79.69
  -4   3  -3 2847.24   52.49
   1  -4  -3 2867.92   56.83
  -1   4  -3 2879.97   66.71
   4  -3  -3 2869.75   71.44
   4  -3  -3 2839.88   73.89
   3   1  -3 2922.39   73.24
   1  -4  -3 2839.89   70.32
   4  -3  -3 2768.04   79.84
  -3  -1  -3 2867.70   83.97
   3   1  -2 1984.95   53.84
   4  -3  -2 1934.32   59.48
  -3  -1  -2 1951.86   67.54
   1  -4  -2 1986.01   60.23
  -4   3  -2 2003.16   65.23
  -1   4  -2 2058.70   52.78
   4  -3  -2 2034.74   62.57
   1  -4  -2 1972.47   53.74
   3   1  -2 2046.65   55.40
  -3  -1  -2 1996.58   28.24
  -4   3  -2 2064.90   44.12
  -1   4  -2 1977.59   52.01
   1  -4  -1 1180.92   38.56
   3   1  -1 1240.96   49.71
  -4   3  -1 1156.85   35.61
   4  -3  -1 1179.05   47.32
  -3  -1  -1 1202.16   26.21
   1  -4  -1 1162.58   39.24
  -3  -1  -1 1239.85   52.75
  -4   3  -1 1196.48   49.16
   4  -3  -1 1198.91   43.30
  -1   4  -1 1196.86   38.00
   3   1  -1 1229.04   37.49
  -1   4   0 1434.30   41.72
  -3  -1   0 1444.44   45.66
   4  -3   0 1412.30   52.74
  -4   3   0 1404.36   43.18
  -4   3   0 1430.65   52.29
  -3  -1   0 1414.98   35.19
   3   1   0 1441.86   33.77
   3   1   0 1392.56   53.95
   1  -4   0 1387.41   40.61
  -1   4   0 1400.04   34.67
  -3  -1   0 1425.85   55.00
   4  -3   0 1345.50   40.78
  -1   4   1 1250.77   39.70
  -3  -1   1 1297.19   50.93
   4  -3   1 1257.42   34.77
  -3  -1   1 1241.66   38.73
  -4   3   1 1236.57   45.78
  -1   4   1 1255.86   42.02
   1  -4   1 1232.79   49.35
  -1   4   1 1258.54   41.56
  -4   3   1 1286.03   48.63
   4  -3   1 1318.91   52.03
  -3  -1   1 1255.81   43.70
   3   1   1 1277.13   52.52
   1  -4   1 1312.81   41.14
  -1   4   2 1969.70   57.32
  -3  -1   2 2048.56   56.74
   4  -3   2 2060.96   67.13
  -4   3   2 2097.26   60.93
   1  -4   2 2054.07   69.07
  -3  -1   2 2189.53   65.05
   4  -3   2 2056.90   43.06
   3   1   2 2185.28   70.66
  -4   3   2 2045.64   65.51
  -1   4   2 2067.03   62.07
  -1   4   2 2064.61   46.43
   1  -4   2 2078.91   54.58
  -4   3   3 2875.30   70.13
  -1   4   3 2941.17   83.59
   1  -4   3 2846.74   69.63
  -4   3   3 2894.37   85.00
   1  -4   3 2993.25   90.17
   3   1   3 2993.36   84.05
   4  -3   3 3093.35   84.06
  -3  -1   3 2946.56   73.00
  -1   4   3 2971.29   76.73
   4  -3   3 2819.47   51.52
  -3  -1   3 2855.59   75.23
  -4   3   4 1645.92   52.56
  -1   4   4 1678.90   70.15
   4  -3   4 1721.73   64.56
  -3  -1   4 1676.70   62.56
  -1   4   4 1676.55   63.14
   4  -3   4 1666.19   45.10
   1  -4   4 1634.08   57.39
  -3  -1   4 1559.35   51.18
   3   1   4 1614.19   63.02
   3   1   5 2180.77   74.80
  -3  -1   5 2311.75   79.27
   4  -3   5 2267.86   59.12
   4  -3   5 2175.79   74.78
  -3  -1   5 2144.57   57.05
  -1   4   5 2217.33   87.46
  -3  -1   5 2172.07   75.33
   1  -4   5 2122.02   63.04
   1  -4   5 2290.65   74.03
   1  -4   6  530.10   32.00
  -1   4   6  529.26   45.81
   1  -4   6  584.73   40.89
  -3  -1   6  546.24   26.96
  -3  -1   6  547.83   41.28
   4  -3   6  625.59   34.49
   4  -3   6  555.62   38.55
   1  -4   7  753.06   49.39
   1  -4   7  757.51   38.27
   4  -3   7  749.32   53.04
  -3  -1   7  743.55   50.90
   3   1   7  743.23   59.31
   4  -3   7  717.70   44.45
   4  -3   7  760.23   42.22
  -1   4   7  788.85   60.03
  -3  -1   7  759.90   28.15
   4  -3   8  657.21   42.08
   4  -3   8  592.14   50.72
  -3  -1   8  637.65   50.24
   1  -4   8  622.76   34.16
   3   1   8  669.09   59.80
   1  -4   8  718.30   51.36
  -1   4   8  689.15   60.00
  -1   4   9    0.97   11.55
   4  -3   9   -5.47    8.13
   1  -4   9    9.72   11.38
   3   1   9    3.42   14.34
   4  -3   9   -3.38    6.48
   1  -4   9    0.34    3.52
  -3  -1   9   -0.54    9.05
   1  -4  10  293.42   36.74
   3   1  10  290.39   45.71
   4  -3  10  336.67   34.52
  -3  -1  10  306.53   39.00
  -1   4  10  268.60   41.76
   4  -3  10  331.60   44.40
  -3  -1  11  148.80   28.38
  -1   4  11  111.61   29.72
   3   1  11  142.93   33.58
   4  -3  11  182.64   26.96
   4  -3  11  143.12   31.14
   1  -4  11  197.37   33.05
   4  -3  12  136.61   31.68
   1  -4  12   84.95   24.22
  -3  -1  12  143.59   28.95
  -1   4  12   85.87   28.44
   4  -3  12   97.70   21.01
   3   1  12  143.29   35.18
   4  -3  13   18.57   11.29
  -3  -1  13   41.51   20.53
   1  -4  13   27.52   15.94
   3   1  13   10.68   16.09
   4  -3  13   46.71   20.55
  -3  -1  14   52.67   22.23
   4  -3  14   11.19   12.63
   3   1  14   37.52   22.84
   1  -4  14   39.97   19.31
   1  -4  15    9.51   11.61
   3   1  15   27.94   23.56
  -3  -1  15    9.86   11.10
   4  -3  15    1.45   10.27
   4  -3  16   -5.70   11.58
   1  -4  16  -23.82   16.82
   2  -4 -16   -5.41   13.11
  -4   2 -16    6.74   13.00
  -2   4 -15    8.40   10.85
   4  -2 -15   18.40   13.53
   2  -4 -15   39.49   19.47
  -4   2 -15   14.46   17.40
  -2   4 -14   23.64   14.69
  -4   2 -14   21.29   16.04
   4  -2 -14   19.36   16.07
   2  -4 -14   12.48   12.02
  -2  -2 -14   -0.37    6.19
   4  -2 -13   22.78   17.35
  -2  -2 -13   10.56   11.32
  -2   4 -13   11.42   13.11
   2  -4 -13    3.24   12.92
  -4   2 -13  -17.49   15.46
  -2   4 -12  161.18   35.47
   4  -2 -12  112.52   28.15
  -2  -2 -12  127.56   25.24
   2  -4 -12   79.40   23.89
   2  -4 -11   84.63   23.34
  -2   4 -11   71.88   23.24
   2  -4 -11   88.63   18.18
  -2  -2 -11   49.60   16.45
   4  -2 -11   87.07   26.23
  -4   2 -10  345.25   30.32
   2  -4 -10  419.24   34.96
  -2   4 -10  392.88   49.31
   2  -4 -10  331.05   42.08
  -2  -2 -10  372.69   39.00
   4  -2 -10  392.96   49.54
   2  -4 -10  341.14   23.05
  -2  -2 -10  366.15   32.46
  -2  -2  -9  362.31   35.83
   4  -2  -9  469.56   51.81
   2  -4  -9  392.91   25.65
   2  -4  -9  412.69   44.71
  -2  -2  -9  415.21   34.75
   2  -4  -9  397.68   27.15
  -4   2  -9  444.54   34.67
  -2   4  -9  415.85   48.45
   2  -4  -8  115.62   23.09
  -2   4  -8  154.96   29.01
  -2  -2  -8  158.01   22.05
  -4   2  -8  134.91   19.41
   4  -2  -8  141.16   27.97
  -2  -2  -8  115.44   18.49
  -4   2  -7  419.97   33.26
  -4   2  -7  404.10   26.41
   4  -2  -7  399.78   20.79
  -2  -2  -7  397.10   33.38
  -2  -2  -7  373.99   30.27
  -2   4  -7  458.07   46.25
   2  -4  -7  392.45   37.86
   4  -2  -7  420.85   43.64
   4  -2  -6 1974.87   87.40
  -4   2  -6 2153.91   54.67
  -2  -2  -6 2112.51   63.49
  -2  -2  -6 2238.53   76.80
  -2  -2  -6 2134.13   61.75
  -2   4  -6 2285.83   95.75
   2  -4  -6 2128.98   81.06
   4  -2  -6 2026.13   51.98
  -4   2  -6 2122.25   72.90
   4  -2  -5  894.24   29.11
  -4   2  -5  942.67   31.47
  -2   4  -5  966.97   58.69
   4  -2  -5  884.63   36.53
  -2  -2  -5  921.03   36.10
   4  -2  -5  964.88   56.63
  -2  -2  -5  913.16   48.10
  -2  -2  -5  904.29   36.99
   2  -4  -5  940.25   50.25
  -4   2  -5  932.04   47.57
  -2   4  -4  903.36   38.30
   4  -2  -4  958.96   26.56
  -4   2  -4  933.03   46.62
   4  -2  -4  871.37   49.91
  -2  -2  -4  855.02   45.78
   2  -4  -4  905.45   25.57
  -4   2  -4  887.77   25.76
   4  -2  -4  898.18   38.46
   2  -4  -4  928.00   46.10
  -2  -2  -4  855.15   31.37
  -2   4  -4  897.38   53.25
   2  -4  -3  709.20   37.43
  -2  -2  -3  744.56   41.50
   4  -2  -3  699.87   34.85
  -2  -2  -3  677.83   23.44
   4  -2  -3  709.98   36.68
   2   2  -3  717.28   35.54
  -2   4  -3  674.54   42.65
   4  -2  -3  692.08   40.27
  -4   2  -3  659.70   20.80
  -4   2  -3  659.31   38.57
   2  -4  -3  673.45   40.71
  -2   4  -3  743.99   32.26
   2  -4  -2 2760.71   72.84
  -2   4  -2 2851.56   59.71
   4  -2  -2 2752.45   65.26
  -4   2  -2 2724.75   76.01
   4  -2  -2 2871.47   72.13
  -2   4  -2 2715.29   78.40
  -2  -2  -2 2745.01   77.07
   2  -4  -2 2766.72   67.42
  -2  -2  -2 2779.53   40.73
   2   2  -2 2862.04   69.63
  -4   2  -2 2807.06   42.96
   4  -2  -2 2655.83   70.67
   2   2  -2 2799.86   63.48
  -2  -2  -1  724.81   38.95
  -2  -2  -1  790.16   33.60
  -2  -2  -1  783.95   23.69
   4  -2  -1  719.81   32.52
   4  -2  -1  825.24   31.31
   2  -4  -1  764.89   32.40
  -2   4  -1  775.76   30.50
   2  -4  -1  763.42   32.77
  -4   2  -1  731.37   25.07
   4  -2  -1  821.62   39.80
  -2   4  -1  801.00   38.90
   2   2  -1  795.17   29.72
  -4   2  -1  770.11   39.59
   2   2  -1  739.68   33.06
   2  -4   0  934.83   37.92
   2   2   0  904.14   35.54
   4  -2   0  925.95   43.10
  -2  -2   0  942.74   29.28
  -4   2   0 1050.82   45.23
   4  -2   0  940.28   31.63
  -4   2   0  947.37   33.48
   2   2   0  933.71   28.21
  -2  -2   0  949.09   43.36
  -2   4   0  914.00   34.53
   2  -4   0  941.54   29.17
  -2  -2   0  981.78   38.17
   2  -4   0  909.86   33.34
   2  -4   1  735.37   37.45
  -2   4   1  813.65   35.18
   4  -2   1  822.32   24.63
   2   2   1  796.56   22.58
  -2  -2   1  784.79   30.56
  -2  -2   1  849.91   37.26
  -4   2   1  751.06   34.20
   4  -2   1  812.11   41.42
   2  -4   1  807.60   31.15
  -4   2   1  828.25   39.34
  -2   4   2 2837.52   46.90
   2   2   2 2768.84   46.24
  -4   2   2 2696.81   68.69
  -2   4   2 2736.01   70.04
  -2  -2   2 2734.13   64.04
   2  -4   2 2845.99   80.93
   4  -2   2 2772.67   39.69
   4  -2   2 2768.77   78.25
   2  -4   2 2718.09   59.58
   4  -2   3  621.32   38.15
  -2   4   3  635.29   38.45
   2  -4   3  547.26   20.78
  -2   4   3  615.05   36.46
   2   2   3  606.14   24.94
  -4   2   3  634.20   32.01
  -2  -2   3  595.24   33.70
   4  -2   3  584.85   19.23
   2  -4   3  579.61   33.10
   2  -4   3  591.89   29.95
   2  -4   4  915.28   34.71
  -2   4   4  870.35   49.91
  -4   2   4  824.95   35.52
   2   2   4  895.06   35.26
   2  -4   4  904.45   40.64
  -2  -2   4  875.69   45.05
   4  -2   4  905.87   28.91
   2  -4   4  888.85   41.65
  -2  -2   4  896.02   38.95
   4  -2   4  871.67   45.93
  -2   4   5  882.80   54.17
   2  -4   5  980.75   44.47
   4  -2   5  926.03   48.63
   4  -2   5  898.16   33.94
  -4   2   5  895.95   35.60
  -4   2   5  955.85   48.79
  -4   2   5  979.62   35.83
   2  -4   5  940.30   45.62
  -2  -2   5  877.54   48.86
   2  -4   5  920.24   41.53
  -2  -2   5  893.86   38.16
   2   2   5  993.25   60.29
  -2   4   6 1820.57   83.59
  -4   2   6 2043.93   76.61
   2   2   6 2138.80   93.71
   2  -4   6 2033.00   72.68
  -2  -2   6 1976.87   77.47
  -4   2   6 2124.18   51.15
   2  -4   6 2149.04   71.86
  -2  -2   6 2030.94   53.87
   2  -4   6 2126.73   66.05
   4  -2   6 1925.27   55.91
   4  -2   6 2073.98   74.29
  -2  -2   7  400.32   37.74
   4  -2   7  451.50   43.42
   4  -2   7  402.31   33.22
   4  -2   7  428.41   29.26
   2  -4   7  432.29   30.05
   2  -4   7  425.38   35.71
   2   2   7  410.23   44.62
  -2  -2   7  399.82   21.64
   2  -4   7  470.66   38.16
  -2   4   7  396.75   42.11
  -4   2   7  383.73   35.34
   4  -2   8  121.83   17.64
   4  -2   8  172.30   28.89
  -2   4   8  169.68   29.57
  -2  -2   8  138.71   10.27
   2  -4   8  120.73   15.92
   2  -4   8  114.58   20.99
  -2  -2   8  115.39   22.01
   2  -4   8  144.88   23.63
  -4   2   8  166.67   25.52
   2   2   8  166.92   30.01
  -2  -2   8  119.94    9.36
   2   2   9  439.59   52.20
   4  -2   9  406.51   33.49
   4  -2   9  476.36   49.99
   2  -4   9  358.70   38.97
   2  -4   9  392.89   27.90
   2  -4   9  460.88   42.93
   2  -4  10  387.58   41.57
  -2  -2  10  295.35   38.09
   4  -2  10  359.75   46.47
   4  -2  10  368.84   33.56
   2   2  10  306.86   46.30
   2  -4  10  332.24   39.84
   2  -4  11   93.11   22.47
   4  -2  11   95.24   26.56
   2   2  11  133.18   33.14
   4  -2  11   72.87   17.35
  -2  -2  11   68.51   21.11
   4  -2  12  116.27   30.73
   2   2  12  104.08   31.25
   4  -2  12  137.43   23.29
  -2  -2  12   81.39   23.61
   2  -4  12  111.75   25.12
   4  -2  13   -9.35   13.27
   2  -4  13   -0.99    9.20
  -2  -2  13  -24.50   15.59
   2   2  13    2.51   12.42
   4  -2  13    3.47    6.32
  -2  -2  14    8.99   13.18
   2  -4  14   21.72   13.50
   4  -2  14   23.86   17.15
   2   2  14   35.05   21.96
   2   2  15   45.65   24.05
   2  -4  15   29.45   15.30
  -2  -2  15   65.90   23.49
   4  -2  15   45.09   22.41
   2  -4  16   -0.62    8.75
   4  -2  16    8.53   15.01
   3  -4 -16   25.02   17.42
  -4   1 -16   15.86   19.71
  -3   4 -16    0.53   14.28
  -4   1 -15   36.88   20.17
   4  -1 -15   20.08   16.94
  -3   4 -15   -8.48   14.70
   3  -4 -15    3.16   14.51
  -3   4 -14   22.67   17.80
  -1  -3 -14   26.92   13.44
  -4   1 -14   10.34   14.43
   3  -4 -14    4.81   12.46
   4  -1 -14   27.61   20.40
   4  -1 -13   12.96   13.52
   3  -4 -13   33.43   19.81
  -3   4 -13    8.27   13.54
  -4   1 -13   26.58   13.40
  -1  -3 -13    3.05   10.23
   4  -1 -12   24.21   19.82
  -1  -3 -12   41.19   18.31
  -3   4 -12   13.64   15.82
   3  -4 -12   30.43   17.91
  -4   1 -12    3.02    7.78
  -1  -3 -11  276.77   36.46
   3  -4 -11  250.47   39.95
  -3   4 -11  236.14   41.20
  -4   1 -10  382.78   33.31
  -1  -3 -10  405.91   33.48
   3  -4 -10  345.65   28.48
   3  -4 -10  413.60   49.08
  -1  -3 -10  407.86   41.14
  -3   4 -10  451.02   54.44
   3  -4  -9  126.40   16.11
   3  -4  -9  117.22   12.87
  -4   1  -9  120.07   19.44
  -1  -3  -9   89.96   16.24
   3  -4  -9  138.35   27.37
  -1  -3  -9  102.11   19.34
  -3   4  -9  139.06   29.86
  -3   4  -8  881.99   68.90
   3  -4  -8  791.90   35.38
  -4   1  -8  829.98   40.55
  -4   1  -8  873.02   50.25
   3  -4  -8  842.89   36.77
   3  -4  -8  819.96   60.20
  -1  -3  -8  862.68   51.77
  -1  -3  -8  829.34   48.45
  -4   1  -7  109.07   18.34
  -3   4  -7   86.97   21.48
  -4   1  -7   58.03   10.02
  -1  -3  -7   70.36   14.27
  -1  -3  -7   63.42   13.91
   3  -4  -7   83.01   18.80
   3  -4  -7   75.67    9.76
   3  -4  -7   78.58   11.67
  -3   4  -6 1411.43   78.33
   3  -4  -6 1295.95   48.39
  -1  -3  -6 1249.40   58.06
   3  -4  -6 1232.96   32.42
  -1  -3  -6 1239.05   52.77
  -4   1  -6 1273.61   39.83
   4  -1  -6 1287.42   41.25
   3  -4  -6 1297.58   65.90
   1   3  -6 1271.91   58.27
  -4   1  -6 1269.12   58.59
  -1  -3  -5  486.17   29.97
  -4   1  -5  476.01   20.71
   1   3  -5  440.95   30.38
   3  -4  -5  464.74   29.04
   4  -1  -5  474.47   26.97
   4  -1  -5  468.28   25.97
   3  -4  -5  462.21   37.27
  -3   4  -5  502.77   44.00
  -1  -3  -5  492.00   35.62
  -4   1  -5  506.84   36.30
   4  -1  -4 4581.42   86.90
  -3   4  -4 4899.60   84.42
   3  -4  -4 4877.88   94.86
  -1  -3  -4 4760.10   83.82
   4  -1  -4 4912.28   76.42
  -3   4  -4 4761.36  125.74
  -4   1  -4 4621.09  106.73
  -4   1  -4 4621.36   49.26
   3  -4  -4 4563.09  107.84
   3  -4  -3 3538.28   81.21
  -3   4  -3 3630.86   69.88
  -4   1  -3 3337.09   88.96
  -3   4  -3 3574.60   84.65
   3  -4  -3 3435.96   86.25
   4  -1  -3 3471.29   81.90
  -3   4  -3 3630.86  100.39
   4  -1  -3 3444.76   77.67
   3  -4  -3 3697.66   98.66
  -4   1  -3 3366.39   33.44
  -1  -3  -3 3470.84   64.09
   1   3  -3 3583.67   78.08
   4  -1  -2  373.64   26.42
   1   3  -2  387.55   23.52
  -3   4  -2  346.80   28.60
   4  -1  -2  416.74   25.43
  -3   4  -2  386.65   21.85
  -1  -3  -2  392.90   23.87
  -1  -3  -2  399.45   19.55
  -4   1  -2  394.27   29.86
   3  -4  -2  426.36   28.39
   3  -4  -2  368.85   26.41
   4  -1  -1  481.40   27.10
   3  -4  -1  404.24   25.32
   3  -4  -1  444.03   28.93
   1   3  -1  452.71   27.88
  -4   1  -1  378.38   28.69
  -1  -3  -1  410.62   19.31
  -3   4  -1  409.70   22.89
  -1  -3  -1  437.18   25.75
   4  -1  -1  425.17   29.22
  -3   4  -1  410.58   28.61
   4  -1  -1  425.94   22.86
   1   3  -1  412.05   21.89
   3  -4   0   17.58    7.18
  -4   1   0   25.47    7.99
   1   3   0   16.41    6.20
   4  -1   0   24.13    8.78
  -1  -3   0   17.04    4.98
   3  -4   0   16.43    5.99
  -1  -3   0   17.25    5.65
  -3   4   0   13.65    5.98
   1   3   0   18.34    4.26
  -3   4   0    8.89    4.74
   4  -1   0   42.39    8.60
   4  -1   0   17.63    6.41
   4  -1   1  323.76   12.16
   4  -1   1  317.44   13.50
  -4   1   1  390.97   28.80
  -3   4   1  328.18   19.04
   3  -4   1  331.70   20.11
  -1  -3   1  301.06   19.70
  -4   1   1  395.55   21.23
   3  -4   1  323.95   25.13
   1   3   1  322.03   17.73
  -3   4   1  324.54   23.16
   4  -1   1  326.97   26.82
   1   3   2  341.72   20.25
  -3   4   2  315.84   25.11
  -4   1   2  341.43   26.65
  -4   1   2  361.13   20.45
  -4   1   2  423.05   25.24
   3  -4   2  361.58   26.94
  -1  -3   2  332.51   22.95
   4  -1   2  349.08   28.32
   3  -4   2  342.23   20.52
  -4   1   3 3722.73   82.61
   3  -4   3 3663.58   70.60
   3  -4   3 3667.64   87.09
   4  -1   3 3672.27   93.94
  -1  -3   3 3621.12   81.80
   1   3   3 3582.79   71.46
  -3   4   3 3650.27   93.46
  -4   1   3 3676.89   79.43
  -1  -3   4 4662.30  101.76
  -4   1   4 4592.92   86.04
   4  -1   4 4733.39  108.84
   3  -4   4 4880.17  102.77
   4  -1   4 4388.29   51.19
  -4   1   4 4802.95  103.15
   3  -4   4 4604.23   87.67
   1   3   4 4870.29  121.79
   1   3   4 4660.03   91.74
   3  -4   5  515.16   33.04
  -4   1   5  548.04   27.96
   3  -4   5  560.27   33.48
   1   3   5  508.91   33.33
   1   3   5  515.24   43.84
   4  -1   5  523.26   22.21
  -1  -3   5  542.06   38.26
  -4   1   5  522.12   31.01
  -4   1   5  504.07   35.97
   3  -4   5  543.66   35.37
   4  -1   5  536.39   37.59
   1   3   6 1307.82   74.03
  -1  -3   6 1407.17   65.31
  -4   1   6 1306.96   39.57
  -4   1   6 1353.22   54.50
   3  -4   6 1340.89   59.35
   4  -1   6 1210.23   39.94
  -4   1   6 1325.68   62.30
   3  -4   6 1256.86   54.51
   3  -4   6 1317.34   55.53
  -4   1   7   97.53   16.34
   3  -4   7  105.79   17.89
  -4   1   7  101.54    9.80
   3  -4   7   98.53   15.85
   3  -4   7   95.08   18.34
   1   3   7   90.95   21.51
   4  -1   7   89.56   12.55
  -1  -3   7  110.62   21.27
  -4   1   7  129.21   21.54
  -1  -3   8  796.36   32.38
   4  -1   8  811.31   63.32
   3  -4   8  736.96   53.29
   1   3   8  826.42   67.94
   3  -4   8  759.61   43.34
   3  -4   8  770.73   50.33
  -1  -3   8  867.15   58.08
  -4   1   8  822.54   56.09
   4  -1   8  844.72   41.39
  -1  -3   8  805.28   31.32
   4  -1   9   79.25   14.62
  -1  -3   9   87.28    8.56
   3  -4   9   82.13   14.43
   3  -4   9  126.65   24.16
   4  -1   9  107.33   25.98
   3  -4   9   90.48   19.50
   1   3   9  123.50   28.27
  -1  -3   9   95.30    8.76
  -1  -3   9  123.51   23.81
  -4   1   9   95.26   21.07
   3  -4  10  455.60   43.69
   4  -1  10  447.76   53.75
   3  -4  10  456.13   48.60
  -4   1  10  505.25   49.12
  -1  -3  10  449.23   47.18
   1   3  10  452.70   55.94
   3  -4  11  275.97   40.70
  -4   1  11  185.34   32.56
   1   3  11  214.72   40.39
  -1  -3  11  247.90   37.06
   3  -4  11  292.70   37.12
   4  -1  11  262.91   43.80
  -1  -3  12    8.21   12.39
   3  -4  12   32.96   16.99
   3  -4  12   13.70   11.82
   4  -1  12   -2.03   12.88
   1   3  12   29.23   18.39
  -4   1  12   11.10   10.08
   3  -4  13  -12.94   12.18
   1   3  13    1.94   12.94
   3  -4  13   -4.75    9.58
   4  -1  13   11.75   16.71
  -1  -3  13   24.06   14.65
  -1  -3  14   12.27   12.13
   4  -1  14   20.27   18.57
   1   3  14   36.85   23.71
   3  -4  14   31.53   16.19
  -1  -3  15   37.89   19.75
   1   3  15   19.04   18.78
   4  -1  15   30.52   23.47
   3  -4  15   41.89   18.28
  -1  -3  16   32.30   18.25
   4  -1  16   33.04   24.85
  -4   4 -16   25.83   20.21
   4  -4 -16   -2.32   15.23
   4  -4 -15   31.99   19.95
  -4   0 -15   27.06   17.27
   4   0 -15   23.62   12.97
   0  -4 -15  -23.69   15.81
  -4   4 -15   32.28   24.56
   4  -4 -14  -11.15   14.64
   0  -4 -14    2.37    8.00
  -4   4 -14   21.17   16.62
   4   0 -14   20.95   16.03
   4  -4 -13  -15.38   16.54
  -4   4 -13    0.65   13.31
   0  -4 -13    1.01   10.45
  -4   0 -12   27.39   13.35
   4  -4 -12    5.71   13.73
   0  -4 -12   46.66   18.52
  -4   4 -12   33.54   19.16
   4  -4 -11   89.91   26.04
   0  -4 -11   45.79   16.17
  -4   0 -11   59.64   16.14
  -4   0 -11   63.98   14.97
  -4   4 -11   64.53   25.42
   4  -4 -10  111.52   27.44
  -4   0 -10   52.61   14.79
  -4   0 -10   83.33   18.11
   0  -4 -10   50.09   12.85
   0  -4 -10   89.17   21.36
  -4   4 -10   87.02   27.41
   0  -4  -9  677.20   51.86
  -4   0  -9  671.48   45.71
   0  -4  -9  607.47   42.02
   4  -4  -9  613.55   58.13
  -4   4  -9  675.17   64.44
  -4   0  -9  612.78   45.28
   4  -4  -8   95.99   23.57
   0  -4  -8  116.12   20.35
  -4   4  -8  105.07   26.33
   0  -4  -8  111.52   18.86
  -4   0  -8   99.51   16.57
  -4   4  -8  115.22   18.18
  -4   0  -8  107.25   19.52
  -4   0  -8  107.35   14.54
   4  -4  -8  111.01   13.51
  -4   4  -7  171.23   21.75
  -4   0  -7  171.61   19.33
  -4   0  -7  137.06   21.87
  -4   0  -7  171.60   16.35
   4  -4  -7  188.76   28.19
   0  -4  -7  159.48   22.06
   4  -4  -7  174.39   17.48
   0  -4  -7  175.49   22.97
   0   4  -6 1170.19   51.81
  -4   0  -6 1258.80   61.71
   0  -4  -6 1115.24   53.20
  -4   0  -6 1136.00   41.96
  -4   4  -6 1209.97   56.26
   4  -4  -6 1110.07   45.24
  -4   0  -6 1164.34   36.95
   4  -4  -6 1218.65   67.17
  -4   4  -5  275.95   26.45
  -4   0  -5  308.46   17.99
   4   0  -5  314.89   23.59
   4  -4  -5  301.16   24.00
  -4   4  -5  324.74   22.40
   4   0  -5  316.27   24.66
   0   4  -5  299.70   23.17
   0  -4  -5  272.85   24.96
  -4   0  -5  315.55   16.28
  -4   0  -5  298.31   29.73
   4  -4  -5  310.62   32.12
   4  -4  -4  106.47   21.67
  -4   0  -4   78.43    6.48
  -4   4  -4  102.94   16.55
   4   0  -4   67.47   11.84
  -4   0  -4   76.09    5.94
   4  -4  -4  110.61   14.95
   4   0  -4   75.72   11.77
  -4   0  -4   87.93   16.54
   0  -4  -4   71.83   12.65
   0   4  -4   89.99   10.87
  -4   4  -4   71.88   10.39
   4  -4  -3 3124.57   79.14
   4   0  -3 3106.03   80.55
   0  -4  -3 3140.79   67.91
  -4   4  -3 3056.88   84.62
   4  -4  -3 3110.47   86.53
  -4   0  -3 3072.47   91.00
   4   0  -3 3056.50   77.70
   0  -4  -3 3107.20   69.25
   4   0  -3 3074.14   66.82
  -4   4  -3 3208.42   63.68
   0  -4  -2  153.32   14.71
  -4   4  -2  157.10   14.14
   0   4  -2  145.59   14.73
   4  -4  -2  124.82   16.76
   4   0  -2  144.53   15.49
   4   0  -2  144.89   17.75
  -4   4  -2  127.82   17.54
  -4   0  -2  128.61   19.14
   4  -4  -2  140.85   17.10
   0  -4  -2  146.38   15.02
   0   4  -1  306.86   19.78
   4   0  -1  311.57   26.42
   0  -4  -1  295.48   19.07
  -4   0  -1  299.29   12.48
   4  -4  -1  301.90   22.97
   4   0  -1  287.82   18.95
  -4   0  -1  310.87   27.86
  -4   4  -1  321.70   21.16
  -4   4  -1  302.53   25.89
   4  -4  -1  281.70   24.16
   0  -4   0  633.06   28.15
  -4   0   0  622.18   37.99
   4  -4   0  633.29   36.54
   4   0   0  667.16   24.06
  -4   4   0  671.65   32.53
   4   0   0  623.92   38.23
  -4   4   0  655.14   37.41
  -4   0   0  623.60   23.44
   0   4   0  657.96   28.18
   0   4   0  612.41   32.45
   4  -4   0  612.45   29.80
  -4   0   1  276.71   20.21
   4   0   1  267.25   11.24
   0  -4   1  273.32   19.70
  -4   0   1  303.43   25.86
   0   4   1  265.82   19.88
  -4   4   1  288.65   23.27
   0   4   1  283.88   21.23
  -4   0   1  276.68   18.80
   4   0   1  268.09   25.72
  -4   4   1  294.16   25.12
   4  -4   1  294.60   19.20
   4  -4   1  271.82   24.36
   0   4   1  303.05   20.03
  -4   0   2  137.51   14.92
  -4   0   2  149.42   17.86
  -4   4   2  124.25   16.93
   0   4   2  123.99   14.28
   4  -4   2  114.48   12.00
   4   0   2  109.31   16.94
   0   4   2  128.24   16.75
  -4   4   2  114.25    9.54
  -4   4   2  139.08   17.44
  -4   0   2  117.54   14.25
   0  -4   2  130.06   14.87
   4  -4   2  109.86   15.98
  -4   0   3 2979.73   76.54
   0   4   3 2909.89   86.36
   0   4   3 2872.83   72.74
   4  -4   3 2965.16   84.23
   0  -4   3 3074.60   76.58
   4  -4   3 3065.46   61.88
   4   0   3 2923.27   87.74
  -4   0   3 3022.71   76.31
   0  -4   4   83.81   14.39
   0   4   4   76.74   13.46
   4  -4   4   85.29   11.82
   4  -4   4   80.31   14.04
   0   4   4   96.87   18.37
  -4   0   4   83.60   15.19
  -4   0   4   87.09   13.16
  -4   0   5  289.99   29.06
   4  -4   5  358.15   25.76
   0  -4   5  312.00   29.11
   0   4   5  273.66   32.47
   4  -4   5  311.22   28.88
  -4   0   5  321.70   23.48
   0   4   6 1072.76   67.96
  -4   0   6  986.72   51.45
  -4   0   6 1044.49   39.72
   4  -4   6 1150.34   50.07
  -4   0   6 1051.17   58.03
   0  -4   6 1060.13   56.38
   4  -4   7  201.47   23.32
   0  -4   7  186.29   26.32
   0  -4   7  184.45   18.66
  -4   0   7  177.55   25.48
   4  -4   7  176.97   25.40
   0   4   7  198.30   32.19
  -4   0   7  170.97   14.61
   0   4   8  137.98   29.19
  -4   0   8  110.87    8.94
   0  -4   8  114.63   21.79
   4  -4   8  114.43   19.45
   4  -4   8  118.58   22.85
   4   0   8  116.23   25.60
   0  -4   8  125.14   15.14
  -4   0   8  105.68   21.24
   0  -4   9  603.75   51.11
   0   4   9  710.36   65.45
   4   0   9  627.60   61.16
   4  -4   9  679.95   56.78
   4  -4   9  696.42   48.92
  -4   0   9  701.58   55.76
   4   0  10   47.63   19.55
   0  -4  10  113.74   24.43
   4  -4  10   71.62   20.43
   0   4  10   91.70   25.79
   4  -4  10  115.93   21.38
  -4   0  10   88.99   23.43
   0   4  11   75.59   25.06
   4   0  11   91.45   28.44
   4  -4  11   31.82   13.36
   0  -4  11  110.79   24.86
   4  -4  11   56.89   20.09
  -4   0  11   89.09   22.90
   4  -4  12   29.00   15.55
   4  -4  12   14.73   10.83
   0  -4  12   20.40   11.92
   0   4  12   33.48   18.38
  -4   0  12   47.42   18.59
   4   0  12   22.59   16.75
  -4   0  13   14.02   12.58
   4   0  13   11.70   12.43
   0  -4  13   -4.90   10.05
   4  -4  13   -8.93   10.46
   4  -4  13   19.48   11.73
   0   4  13   15.52   12.66
   4  -4  14    6.98   10.58
   0  -4  14   -3.86   10.10
   4   0  14    1.99   11.18
  -4   0  14    3.19    8.26
   0   4  14    2.05   13.22
   4  -4  14   -2.36   10.05
   4  -4  15    4.82   14.55
   4   0  15   18.37   17.74
   0  -4  15   36.86   19.37
   0  -4  16   -9.57   11.47
  -5   4 -16   60.85   29.08
   1  -5 -15   17.52   16.15
   5  -4 -15  -12.29   16.38
  -5   4 -15   -0.16   10.33
   5  -4 -14   30.49   23.30
   1  -5 -14   24.75   18.27
  -5   4 -14   53.66   24.65
   5  -4 -13   46.62   22.13
   1  -5 -13   18.25   14.48
  -5   4 -13   57.39   25.49
   1  -5 -12    8.18   11.97
   5  -4 -12    8.38   12.49
  -5   4 -12   -3.63   10.60
   5  -4 -11   83.99   25.07
  -5   4 -11  191.95   39.48
  -4  -1 -11  181.43   26.06
  -4  -1 -11  119.37   21.54
   1  -5 -11  173.06   31.20
  -4  -1 -10   28.52   12.23
   5  -4 -10   16.78   14.01
   1  -5 -10   37.14   10.98
  -4  -1 -10   38.22   11.40
  -5   4 -10   22.99   10.15
   1  -5 -10   19.04   12.00
   1  -5  -9  280.70   35.43
   1  -5  -9  348.91   33.22
  -5   4  -9  352.31   34.29
  -4  -1  -9  377.49   38.02
   5  -4  -9  320.93   16.53
   5  -4  -9  374.57   46.37
  -4  -1  -9  346.87   31.33
  -4  -1  -8   90.85   14.68
   5  -4  -8  113.18   25.08
   1  -5  -8   86.46   18.87
  -4  -1  -8   65.98   15.82
   5  -4  -8   70.18    6.33
   5  -4  -8   85.09   12.76
  -4  -1  -8   77.77   12.39
  -5   4  -8   74.06   16.05
   5  -4  -7  628.35   53.86
  -5   4  -7  566.47   42.28
   1  -5  -7  494.50   40.56
  -4  -1  -7  613.88   32.69
  -4  -1  -7  610.62   47.12
  -4  -1  -7  556.19   29.85
   5  -4  -7  566.94   34.31
  -5   4  -6   79.10   16.30
  -4  -1  -6  126.05   21.28
   5  -4  -6   84.97   19.85
  -5   4  -6   78.63   11.33
   1  -5  -6   76.32   16.64
   5  -4  -6   88.27   14.30
   4   1  -6   76.71   14.79
  -4  -1  -6   83.75   10.56
  -4  -1  -6   82.61   10.52
   1  -5  -5  538.00   37.25
   5  -4  -5  494.98   41.56
  -4  -1  -5  564.59   23.35
  -4  -1  -5  537.44   21.21
  -5   4  -5  546.69   40.03
   4   1  -5  542.29   35.59
   1  -5  -5  543.24   28.84
  -5   4  -5  576.24   29.53
   5  -4  -5  538.11   34.65
   4   1  -4 1110.96   48.07
  -4  -1  -4 1084.59   58.96
   1  -5  -4 1095.02   49.88
   5  -4  -4 1120.99   50.81
  -5   4  -4 1103.18   56.17
  -4  -1  -4 1082.89   25.77
  -4  -1  -4 1060.98   20.32
   5  -4  -4  957.29   53.93
   1  -5  -4 1049.03   40.35
  -5   4  -4 1158.39   39.06
   4   1  -3  658.97   35.15
  -5   4  -3  621.66   41.64
   5  -4  -3  744.69   44.55
   1  -5  -3  699.55   36.59
  -4  -1  -3  688.52   46.73
   1  -5  -3  688.20   33.02
  -4  -1  -3  704.72   16.60
  -5   4  -3  684.50   29.35
   5  -4  -3  685.67   40.05
   5  -4  -2  246.42   24.08
  -5   4  -2  211.92   23.96
   4   1  -2  244.31   20.88
  -5   4  -2  249.67   18.51
  -4  -1  -2  238.18   27.06
   4   1  -2  208.35   22.62
   1  -5  -2  236.65   20.55
   4   1  -2  224.08   19.76
   5  -4  -2  215.57   22.42
  -4  -1  -2  248.03   11.52
  -5   4  -1 1535.93   48.14
   1  -5  -1 1592.41   49.21
  -4  -1  -1 1524.44   34.56
  -5   4  -1 1537.91   63.03
  -4  -1  -1 1546.49   66.47
  -1   5  -1 1485.17   47.34
   5  -4  -1 1416.92   51.88
   5  -4  -1 1467.03   60.02
   4   1  -1 1622.47   64.40
  -1   5  -1 1431.54   28.59
   4   1  -1 1522.85   45.52
  -1   5   0    7.76    4.63
  -5   4   0    5.09    7.19
  -5   4   0    7.05    3.81
  -4  -1   0    0.45    2.77
   4   1   0    5.15    2.44
   5  -4   0    5.02    5.62
   5  -4   0   -0.34    5.15
  -4  -1   0    1.93    3.07
  -1   5   0    5.14    3.33
   1  -5   0   -1.85    5.23
   4   1   0    2.68    3.63
  -4  -1   0    1.92    6.39
  -5   4   1 1450.13   54.91
  -1   5   1 1434.15   48.85
   4   1   1 1385.28   30.26
  -4  -1   1 1371.80   59.73
   4   1   1 1375.42   61.82
  -5   4   1 1412.37   58.23
   5  -4   1 1422.70   43.19
  -4  -1   1 1421.62   45.72
   1  -5   1 1446.44   48.67
  -1   5   1 1402.63   47.62
  -4  -1   1 1408.35   51.46
  -1   5   1 1394.77   48.73
   5  -4   1 1413.94   60.78
  -4  -1   2  173.85   21.27
  -5   4   2  195.76   21.99
  -4  -1   2  196.21   20.12
  -1   5   2  171.06   18.60
  -1   5   2  201.89   17.59
  -4  -1   2  196.86   19.20
   1  -5   2  161.82   17.41
   5  -4   2  194.06   15.56
  -1   5   2  179.38   19.99
  -5   4   2  189.96   21.08
   5  -4   3  660.28   27.91
  -4  -1   3  665.32   39.76
  -5   4   3  738.87   41.06
  -1   5   3  669.04   42.45
   1  -5   3  694.34   37.80
  -4  -1   3  707.60   39.69
  -4  -1   4 1217.90   55.77
   1  -5   4 1300.15   54.91
  -5   4   4 1258.25   53.01
  -4  -1   4 1229.38   52.62
  -1   5   4 1222.40   62.61
   5  -4   4 1245.70   41.38
   1  -5   5  513.15   37.55
  -4  -1   5  589.77   35.18
  -1   5   5  630.59   49.28
  -4  -1   5  610.19   42.35
   5  -4   5  612.50   31.91
   5  -4   6   64.19   12.02
  -1   5   6   62.37   18.18
   1  -5   6   91.62   14.77
  -4  -1   6   89.69   19.62
   1  -5   6   79.63   16.65
  -4  -1   6   78.62   12.93
   1  -5   7  528.82   43.24
   5  -4   7  560.55   36.71
   1  -5   7  515.92   35.47
  -4  -1   7  596.87   48.00
  -4  -1   7  526.16   29.86
  -1   5   7  568.56   53.03
  -4  -1   8   52.57    8.58
  -1   5   8   63.01   20.19
   4   1   8   77.42   23.47
   1  -5   8   99.59   20.70
   5  -4   8   51.81   12.53
  -4  -1   8   77.91   21.62
   5  -4   8   36.92   13.55
   1  -5   8   42.59   10.61
   1  -5   9  369.71   40.78
   5  -4   9  321.60   31.99
   5  -4   9  323.82   40.99
   4   1   9  410.85   51.13
  -4  -1   9  377.44   42.40
  -1   5   9  309.97   43.66
   4   1  10   16.47   14.63
   1  -5  10   34.45   16.30
   5  -4  10    7.13   10.23
  -4  -1  10   29.71   13.76
   5  -4  10   23.87   10.57
  -1   5  10   37.36   17.66
  -4  -1  11  108.90   25.56
   5  -4  11  131.35   29.54
  -1   5  11  120.08   28.85
   1  -5  11  168.47   31.06
   5  -4  11  124.20   22.58
   4   1  11  168.22   37.33
   5  -4  12    9.36   13.02
   1  -5  12   29.60   14.80
  -1   5  12   23.97   18.32
   5  -4  12    7.69    6.19
  -4  -1  12   12.50   12.14
   4   1  12   28.79   18.11
   4   1  13   58.61   28.08
   1  -5  13   45.30   20.30
   5  -4  13   53.35   21.31
  -4  -1  13   54.16   23.67
   5  -4  13   46.68   15.93
   4   1  14   44.76   22.71
   1  -5  14   32.95   19.23
   5  -4  14   25.08   17.19
  -4  -1  14   70.72   24.60
   5  -4  15   30.62   18.55
   4   1  15  -21.07   18.25
  -4  -1  15    7.18   17.76
   1  -5  15   -0.66    8.75
   1  -5  16   47.74   20.65
   2  -5 -16    0.06   10.16
  -5   3 -16   -9.92   16.95
   5  -3 -15   12.70   16.03
  -5   3 -15   12.65   16.08
   2  -5 -15   -4.64   11.88
   5  -3 -14   26.14   14.13
   2  -5 -14    8.13   12.23
  -5   3 -14   25.53   17.38
   2  -5 -13   -1.62    9.65
   5  -3 -13   -9.41   14.86
  -2   5 -13   19.38   15.39
  -5   3 -13  -18.33   16.98
   5  -3 -12   15.15   12.82
   2  -5 -12   23.73   15.26
  -2   5 -12   33.76   18.79
  -3  -2 -12   22.24   11.05
  -2   5 -11  200.55   37.65
  -3  -2 -11  188.57   25.76
   2  -5 -11  214.88   36.23
   5  -3 -11  189.22   38.69
  -3  -2 -11  164.12   26.18
  -5   3 -11  174.31   23.49
  -2   5 -10  102.43   28.63
   2  -5 -10  140.57   18.80
  -3  -2 -10  154.91   24.20
  -3  -2 -10  139.70   22.71
   2  -5 -10  183.68   31.48
   5  -3 -10  160.36   35.06
  -5   3 -10  161.86   23.29
   5  -3  -9   63.99   21.22
   5  -3  -9   55.08    9.27
  -3  -2  -9   68.49   17.97
   2  -5  -9   55.68   16.98
  -2   5  -9   91.70   24.46
  -3  -2  -9   87.33   17.82
  -5   3  -9   62.34   15.14
  -2   5  -8   80.60   22.82
  -3  -2  -8   86.99   18.64
   5  -3  -8   88.68   11.47
   5  -3  -8   91.32   10.80
   2  -5  -8   89.49   20.62
   5  -3  -8   94.23   23.72
  -3  -2  -8   92.62   15.93
  -5   3  -8  112.95   19.47
  -5   3  -7  691.40   46.58
   5  -3  -7  721.53   36.03
  -3  -2  -7  803.49   40.17
   2  -5  -7  741.10   51.91
  -3  -2  -7  765.64   51.21
  -3  -2  -7  763.94   38.57
  -2   5  -7  748.27   60.00
   5  -3  -7  778.28   27.29
  -5   3  -7  773.80   35.59
   5  -3  -7  944.82   66.63
   5  -3  -6  240.22   32.03
  -3  -2  -6  251.47   20.03
   5  -3  -6  228.13   21.55
   5  -3  -6  231.60   13.42
  -5   3  -6  247.19   18.16
   2  -5  -6  241.94   16.93
  -2   5  -6  248.42   33.45
   2  -5  -6  238.11   27.94
  -5   3  -6  248.24   27.50
  -3  -2  -6  284.27   31.94
  -3  -2  -6  212.70   18.67
   2  -5  -5 1893.15   72.20
  -5   3  -5 1755.75   46.08
  -3  -2  -5 1617.12   44.65
  -5   3  -5 1783.36   71.63
   5  -3  -5 1798.74   61.44
   2  -5  -5 1750.54   44.24
  -5   3  -5 1787.05   43.58
   5  -3  -5 1830.03   80.00
  -2   5  -5 1684.31   80.79
  -3  -2  -5 1767.05   45.77
  -3  -2  -5 1789.70   74.85
   2  -5  -4   13.73    4.62
  -5   3  -4   10.12    6.67
  -3  -2  -4   17.66   10.82
  -3  -2  -4   10.11    4.41
  -2   5  -4    6.97    6.61
   3   2  -4   10.87    5.64
   5  -3  -4    1.79    3.78
   5  -3  -4   15.14   10.33
   2  -5  -4   13.21    7.79
  -5   3  -4    9.97    3.89
   3   2  -3 1222.83   50.77
   5  -3  -3 1206.95   55.42
  -3  -2  -3 1310.51   61.75
  -5   3  -3 1206.61   34.26
   2  -5  -3 1290.94   58.54
   5  -3  -3 1234.43   52.96
  -3  -2  -3 1193.88   26.66
  -5   3  -3 1219.63   57.58
   2  -5  -3 1238.46   51.22
  -2   5  -3 1260.62   61.99
   3   2  -2   87.81   12.23
  -5   3  -2   79.61    9.58
   3   2  -2   85.57   13.53
   2  -5  -2   94.65   14.51
   5  -3  -2   92.50   13.04
  -3  -2  -2   90.39    8.31
   5  -3  -2   95.33   14.95
   5  -3  -2   90.74   14.32
  -3  -2  -2   86.60   16.31
   2  -5  -2   76.43   12.72
  -5   3  -2   80.80   15.11
  -2   5  -1 1493.06   47.05
  -3  -2  -1 1595.45   65.08
   3   2  -1 1445.12   50.29
  -5   3  -1 1483.59   43.35
   3   2  -1 1471.65   43.60
   5  -3  -1 1513.99   51.73
   5  -3  -1 1510.74   60.18
  -3  -2  -1 1460.49   35.96
  -3  -2  -1 1539.61   52.69
  -5   3  -1 1411.22   59.54
   2  -5  -1 1416.88   47.47
   2  -5  -1 1443.45   48.39
   2  -5   0  273.56   20.41
  -5   3   0  259.94   20.29
   2  -5   0  276.32   17.35
   5  -3   0  270.46   19.73
  -5   3   0  273.04   25.91
  -3  -2   0  277.06   17.88
  -2   5   0  247.36   19.98
   5  -3   0  282.24   26.60
   3   2   0  256.98   16.09
  -3  -2   0  263.79   26.62
  -3  -2   0  301.88   23.61
   2  -5   0  271.06   23.24
   5  -3   1 1279.83   37.68
   3   2   1 1316.18   30.44
  -5   3   1 1284.27   54.55
  -3  -2   1 1411.19   53.08
  -2   5   1 1348.64   49.07
   5  -3   1 1236.62   56.66
  -5   3   1 1253.82   49.61
  -3  -2   1 1319.95   43.47
  -3  -2   1 1382.93   59.17
   2  -5   1 1319.70   55.59
   2  -5   1 1321.80   45.08
   2  -5   2   56.69   10.31
  -2   5   2   72.80   12.44
  -2   5   2   68.75    9.25
   5  -3   2   53.95    7.47
   3   2   2   59.40    6.90
   2  -5   2   63.39   13.26
  -2   5   2   40.33    9.65
   5  -3   2   70.92   13.94
  -5   3   2   57.92   11.99
  -5   3   2   61.68   11.62
  -3  -2   2   52.52   12.03
  -3  -2   2   47.75    9.80
  -5   3   3 1225.29   50.76
   3   2   3 1230.98   32.58
   2  -5   3 1241.02   47.97
  -3  -2   3 1201.71   52.96
  -2   5   3 1178.65   54.94
  -3  -2   3 1184.73   50.83
   5  -3   3 1217.72   31.68
  -5   3   3 1189.35   31.16
  -5   3   4   14.65    6.35
   5  -3   4    3.73    2.91
   2  -5   4    4.85    2.63
  -3  -2   4   20.48    9.37
   3   2   4    4.72    3.00
  -2   5   4    4.35    7.54
   2  -5   4    6.19    4.96
   2  -5   4   -0.13    6.48
  -3  -2   5 1757.17   72.20
   2  -5   5 1743.57   65.65
   2  -5   5 1760.76   50.72
  -2   5   5 1727.53   78.44
  -5   3   5 1658.22   40.58
  -5   3   5 1813.80   59.40
   2  -5   5 1691.33   63.68
   5  -3   5 1712.36   47.72
  -3  -2   5 1729.44   60.72
   2  -5   6  201.31   24.83
   2  -5   6  195.75   20.32
   5  -3   6  218.81   19.41
  -3  -2   6  226.57   28.18
   2  -5   6  196.80   22.51
  -2   5   6  169.79   27.07
  -5   3   6  204.48   19.69
  -3  -2   6  231.01   21.41
   2  -5   7  806.80   45.89
   2  -5   7  789.28   50.89
   5  -3   7  800.43   40.25
   3   2   7  921.66   68.10
  -2   5   7  751.66   59.06
  -3  -2   7  805.73   36.40
   2  -5   7  729.26   42.95
  -3  -2   7  832.84   56.20
  -2   5   8   94.64   23.61
   2  -5   8   82.15   19.29
  -3  -2   8   91.25   11.24
   5  -3   8   91.84   21.10
   5  -3   8   88.58   15.20
  -3  -2   8   89.49   19.99
   3   2   8   41.06   16.65
   2  -5   8   74.67   13.85
   3   2   9   99.64   28.13
  -3  -2   9   71.20    7.24
   2  -5   9   84.07   20.00
  -2   5   9   82.41   22.50
  -3  -2   9   90.89   22.70
   5  -3   9   85.30   15.99
   5  -3   9   95.09   24.05
   5  -3  10  156.21   31.45
   2  -5  10  147.23   27.58
   3   2  10  146.46   33.54
   5  -3  10  182.70   23.87
  -3  -2  10  197.60   31.63
   3   2  11  120.82   32.45
  -3  -2  11  207.34   35.08
   2  -5  11  195.24   32.88
   5  -3  11  226.29   28.13
   5  -3  11  181.63   36.18
   3   2  12   13.33   14.90
   2  -5  12   37.76   15.44
  -3  -2  12   30.88   15.99
   5  -3  12   28.63   11.45
   5  -3  12   54.29   21.85
  -3  -2  13  -18.84   14.16
   5  -3  13   -0.97   11.39
   3   2  13    4.71   12.48
   2  -5  13    5.72    9.43
   3   2  14   11.02   18.39
   2  -5  14   24.38   14.93
   5  -3  14   12.55   12.34
  -3  -2  14    7.42   10.32
   3   2  15    8.96   18.77
   5  -3  15    2.82   10.13
  -3  -2  15   46.19   20.93
   2  -5  15    2.65    9.75
   5  -3  16    5.06   15.12
   2  -5  16   40.63   19.25
  -3   5 -16   30.22   16.43
  -5   2 -16  -15.24   16.46
   3  -5 -16   -3.70   11.50
  -3   5 -15   -4.37   13.48
   5  -2 -15   13.54   17.00
   3  -5 -15   24.54   17.21
  -5   2 -15   23.15   19.26
  -3   5 -14   11.95   13.85
   3  -5 -14   11.59   15.49
  -5   2 -14   32.40   19.37
   5  -2 -14  -19.79   17.86
   3  -5 -13   36.89   20.66
   5  -2 -13   45.00   21.46
  -3   5 -13   50.77   23.91
  -2  -3 -13   48.66   16.16
  -2  -3 -12    2.11    8.18
   3  -5 -12    6.02   12.70
   5  -2 -12   -7.71   13.24
  -3   5 -11   63.71   24.81
  -2  -3 -11  102.26   22.26
   3  -5 -11   87.91   23.21
  -5   2 -11  129.76   21.15
   5  -2 -11  138.12   33.84
   5  -2 -10  148.82   33.41
   3  -5 -10   85.58   23.38
  -2  -3 -10   98.45   19.07
  -5   2 -10  119.07   20.74
  -3   5 -10  101.62   27.47
  -2  -3 -10   71.79   17.95
   3  -5 -10  104.39   15.14
  -2  -3  -9  179.42   25.58
   3  -5  -9  189.37   18.92
  -3   5  -9  196.22   35.72
  -5   2  -9  199.44   26.96
  -2  -3  -9  175.72   24.61
   3  -5  -9  233.43   34.86
   5  -2  -9  150.27   32.37
   5  -2  -8   66.61    9.42
  -3   5  -8   39.88   16.88
   5  -2  -8   63.79   11.11
   3  -5  -8   41.67   14.00
  -2  -3  -8   35.89   12.73
  -2  -3  -8   47.42   12.57
  -5   2  -8   69.44   11.41
  -5   2  -8   68.69   15.49
   5  -2  -8   52.55   16.63
   3  -5  -8   44.75   10.29
  -5   2  -7  325.18   32.66
   3  -5  -7  324.17   27.10
  -2  -3  -7  363.00   35.23
   5  -2  -7  399.30   44.11
   3  -5  -7  314.49   35.20
  -3   5  -7  345.87   42.24
   5  -2  -7  342.97   23.98
  -5   2  -7  322.91   21.71
   5  -2  -7  347.99   23.14
  -2  -3  -7  338.44   28.18
  -5   2  -6   92.05   17.24
   3  -5  -6  106.69    8.69
  -5   2  -6  118.80   11.44
   5  -2  -6  135.86   24.96
   5  -2  -6  110.79   12.28
  -2  -3  -6  121.06   20.16
   3  -5  -6   97.34   19.00
   5  -2  -6   95.21   13.49
  -2  -3  -6  111.36   14.34
  -2  -3  -6   96.63   14.46
  -3   5  -6  126.69   24.80
   5  -2  -5 2313.53   68.44
   3  -5  -5 2378.18   83.92
   5  -2  -5 2257.86   50.31
  -3   5  -5 2302.17   96.23
  -5   2  -5 2233.29   82.02
  -2  -3  -5 2241.83   59.29
  -5   2  -5 2267.41   41.31
  -2  -3  -5 2268.52   83.79
   5  -2  -5 2528.70   96.36
   5  -2  -4   85.52   13.72
   3  -5  -4   94.85   17.43
  -2  -3  -4   68.97   15.11
  -5   2  -4  101.49   18.17
  -5   2  -4   79.85    7.57
  -3   5  -4   96.62   20.17
   5  -2  -4   93.75   17.68
  -2  -3  -4   63.20    9.51
  -3   5  -3   85.41   17.31
  -2  -3  -3   90.68    9.59
   5  -2  -3   89.95   14.61
   3  -5  -3   74.68   14.63
   3  -5  -3   87.49   15.33
  -5   2  -3   70.02   15.03
  -2  -3  -3   77.52   15.67
  -5   2  -3   82.17    7.59
  -2  -3  -2 2985.83   73.40
   2   3  -2 3012.93   69.78
  -5   2  -2 2810.31   46.79
   5  -2  -2 3055.70   84.53
   3  -5  -2 2855.29   79.73
  -3   5  -2 2805.81   87.09
   5  -2  -2 2937.95   72.13
   3  -5  -2 2863.22   75.64
   5  -2  -2 2830.21   78.01
  -3   5  -2 2924.46   66.65
  -2  -3  -2 2982.91   51.14
   3  -5  -2 2730.39   58.09
  -5   2  -2 2822.08   86.04
   2   3  -2 2898.36   78.11
  -5   2  -1 1584.42   40.79
   2   3  -1 1664.62   55.57
  -2  -3  -1 1495.83   40.14
  -5   2  -1 1503.80   61.72
   2   3  -1 1526.21   44.99
   3  -5  -1 1527.33   51.73
  -2  -3  -1 1498.40   52.49
   3  -5  -1 1455.05   47.97
   5  -2  -1 1497.82   46.01
  -3   5  -1 1516.61   58.69
   5  -2  -1 1576.88   62.00
  -3   5  -1 1531.14   48.57
   3  -5  -1 1552.90   51.97
   5  -2  -1 1534.43   51.35
   5  -2   0  900.25   48.04
   3  -5   0  871.55   41.31
   5  -2   0  845.36   32.83
  -2  -3   0  845.43   40.66
   2   3   0  856.99   38.97
  -2  -3   0  862.47   32.49
  -5   2   0  872.51   35.09
  -3   5   0  876.02   38.64
   5  -2   0  924.95   31.42
   3  -5   0  872.49   36.87
   2   3   0  879.90   30.44
  -5   2   0  895.79   46.97
  -3   5   1 1470.80   53.11
   5  -2   1 1527.75   63.50
  -2  -3   1 1434.66   45.90
   3  -5   1 1408.00   46.07
   2   3   1 1394.49   36.61
   5  -2   1 1421.14   35.46
   3  -5   1 1476.96   58.84
  -5   2   1 1445.99   58.11
   3  -5   1 1414.94   57.62
   3  -5   2 2612.35   78.58
   2   3   2 2711.83   54.74
   5  -2   2 2858.15   89.09
   3  -5   2 2736.82   64.97
  -2  -3   2 2687.30   68.82
   5  -2   2 2774.80   40.37
  -5   2   2 2702.17   77.77
   5  -2   3   67.25    5.59
  -3   5   3   74.46    7.27
  -2  -3   3   79.60   13.84
   3  -5   3   61.67   11.23
   2   3   3   78.96   10.32
  -5   2   3   74.88   10.68
  -5   2   3  105.05   16.98
   3  -5   3   77.53   13.91
   5  -2   4   63.61    6.68
   3  -5   4   44.54   10.39
  -5   2   4   75.69   14.51
   3  -5   4   66.57   13.16
   2   3   4   74.42   11.14
   3  -5   4   81.26   10.40
  -5   2   4   61.11   11.72
  -2  -3   4   70.38   14.55
  -2  -3   5 2482.82   84.31
   5  -2   5 2405.96   48.07
   3  -5   5 2408.47   65.87
  -5   2   5 2533.21   69.44
   2   3   5 2601.40  100.62
  -5   2   5 2544.14   82.96
   2   3   5 2343.77   67.58
   3  -5   5 2437.39   75.02
   3  -5   6  122.41   17.27
   3  -5   6  141.73   20.18
  -5   2   6  107.31   14.16
   5  -2   6  115.60   12.59
   2   3   6  128.00   24.96
  -2  -3   6  111.81   20.25
  -2  -3   6  113.47   16.00
  -5   2   6  111.72   19.92
  -5   2   6  112.03   14.49
  -2  -3   7  283.99   24.07
  -2  -3   7  277.48   32.37
   5  -2   7  306.61   22.75
   2   3   7  281.10   38.41
  -5   2   7  315.46   21.93
   3  -5   7  275.14   29.68
   3  -5   7  279.43   29.46
  -5   2   7  280.18   31.79
  -5   2   7  291.87   25.06
   3  -5   8   40.08   12.64
   2   3   8   38.12   15.04
   5  -2   8   45.93   17.44
  -2  -3   8   51.91    9.48
   3  -5   8   55.28   14.47
  -2  -3   8   31.74   14.75
   5  -2   8   37.45    8.89
  -5   2   8   35.59   13.52
  -2  -3   9  170.35   14.26
   5  -2   9  214.42   36.32
   2   3   9  186.28   35.50
   3  -5   9  193.65   29.32
  -2  -3   9  206.71   32.02
   5  -2   9  213.03   22.90
   3  -5   9  223.01   30.89
   5  -2  10  175.05   33.79
   5  -2  10  137.82   19.71
   2   3  10  157.18   34.62
   3  -5  10  152.24   27.26
  -2  -3  10  140.08   28.89
   3  -5  10  153.71   27.80
   3  -5  11  144.39   27.77
   3  -5  11  163.73   29.98
   5  -2  11  163.77   34.98
   2   3  11  151.23   34.24
  -2  -3  11  133.35   28.38
   5  -2  11  182.52   24.15
   3  -5  12   21.28   12.75
   2   3  12   57.67   25.05
   5  -2  12   39.43   20.54
  -2  -3  12    1.80    9.98
   5  -2  13   25.76   17.31
   2   3  13   33.53   21.10
   3  -5  13   55.83   18.94
  -2  -3  13   77.21   23.59
   5  -2  14   15.39   15.28
  -2  -3  14   37.88   18.41
   3  -5  14  -10.63   12.38
   2   3  14   33.51   20.30
   3  -5  15   26.14   13.91
   5  -2  15   -5.18   11.67
   2   3  15   16.19   19.16
  -2  -3  15   10.40   12.63
   5  -2  16   53.66   29.65
  -5   1 -16   16.01   17.82
  -4   5 -16   13.56   17.53
   4  -5 -15   36.33   19.28
   5  -1 -15    3.74   13.86
  -5   1 -15   23.30   18.87
  -4   5 -15   42.52   24.72
   4  -5 -14   54.79   22.34
  -1  -4 -14  110.08   26.72
   5  -1 -14  146.85   38.43
  -4   5 -14   89.49   31.54
  -1  -4 -13   15.92   13.29
   5  -1 -13    2.07   13.45
   4  -5 -13    8.72   13.18
  -4   5 -13    8.50   16.01
  -4   5 -12   28.86   18.07
   5  -1 -12   17.90   18.40
   4  -5 -12   -7.52   14.81
  -1  -4 -12   22.10   13.52
  -5   1 -11   10.44    8.52
  -5   1 -11   -3.73    6.12
  -1  -4 -11    8.28    8.53
  -4   5 -11    6.91   11.51
   4  -5 -11    3.18   12.51
  -5   1 -10  128.23   22.47
  -1  -4 -10  137.03   22.26
  -4   5 -10  169.02   37.48
   4  -5 -10  136.90   30.24
  -5   1 -10   75.83   16.29
  -1  -4 -10  148.60   25.86
  -5   1  -9  151.96   24.02
   4  -5  -9  183.07   31.84
  -1  -4  -9  174.92   25.34
  -1  -4  -9  132.50   22.18
  -4   5  -9  164.46   33.29
   4  -5  -8  127.18    7.64
  -5   1  -8  110.71   20.57
  -5   1  -8  117.32   14.00
   4  -5  -8   92.69   22.47
  -4   5  -8  137.64   29.75
   5  -1  -8  133.81   18.17
   4  -5  -8  129.68   16.76
  -1  -4  -8  133.52   22.11
  -1  -4  -8  133.50   21.45
   5  -1  -7  459.10   30.89
   4  -5  -7  448.32   31.69
  -5   1  -7  466.96   40.57
  -1  -4  -7  458.02   35.30
   4  -5  -7  473.67   44.52
  -1  -4  -7  463.88   39.94
  -4   5  -7  513.75   53.64
  -5   1  -7  442.31   23.84
   5  -1  -7  443.35   27.50
   4  -5  -6  139.78   23.50
  -5   1  -6  140.97   22.14
   5  -1  -6  175.64   18.98
   5  -1  -6  162.39   17.26
  -1  -4  -6  148.70   22.58
  -4   5  -6  236.03   35.29
  -1  -4  -6  207.96   22.28
   4  -5  -6  190.08   20.93
  -5   1  -6  199.80   13.36
   1   4  -6  185.21   21.84
   4  -5  -5 1803.24   76.51
   5  -1  -5 1798.27   62.29
  -5   1  -5 1807.00   76.71
  -1  -4  -5 1795.90   59.04
   1   4  -5 1818.80   60.03
   5  -1  -5 1800.71   53.28
  -4   5  -5 1794.18   87.37
   4  -5  -5 1791.02   64.75
  -5   1  -5 1756.64   30.08
  -4   5  -4   78.70   15.25
  -1  -4  -4   70.35   11.61
  -4   5  -4   95.38   20.46
  -5   1  -4   80.86    5.29
   4  -5  -4   85.40   14.30
   4  -5  -4   83.20   16.70
  -5   1  -4   71.95   16.31
   5  -1  -4   96.63   12.15
   5  -1  -4   86.03   14.08
  -4   5  -3  718.45   33.56
  -5   1  -3  688.24   45.71
  -1  -4  -3  718.78   31.35
  -4   5  -3  730.02   43.50
   5  -1  -3  731.85   41.46
   4  -5  -3  745.36   42.21
  -1  -4  -3  731.82   36.85
   4  -5  -3  714.98   42.71
  -4   5  -3  685.94   47.73
   5  -1  -2  887.73   39.63
  -4   5  -2  889.92   47.60
  -1  -4  -2  932.89   33.90
   4  -5  -2  978.16   48.49
  -1  -4  -2  928.99   41.59
  -4   5  -2  871.43   49.47
   5  -1  -2  878.55   46.42
  -5   1  -2  898.19   51.02
  -4   5  -2  964.30   38.37
   4  -5  -2  916.26   45.12
   1   4  -1 1439.02   45.75
  -5   1  -1 1314.63   60.28
  -4   5  -1 1430.56   48.39
   4  -5  -1 1404.86   51.37
  -1  -4  -1 1353.71   52.24
   4  -5  -1 1374.92   57.95
   5  -1  -1 1446.41   60.34
   1   4  -1 1350.40   53.14
   5  -1  -1 1411.07   44.59
   5  -1  -1 1407.05   49.67
   1   4  -1 1353.70   43.36
  -4   5  -1 1379.24   56.87
  -1  -4  -1 1384.86   41.29
  -4   5   0 1543.95   53.26
  -1  -4   0 1513.65   46.15
  -5   1   0 1512.37   63.04
   4  -5   0 1497.95   49.73
   5  -1   0 1578.25   64.97
   4  -5   0 1557.46   61.79
   5  -1   0 1488.01   39.22
   5  -1   0 1553.55   44.38
   1   4   0 1511.72   53.58
   1   4   0 1487.98   43.04
  -4   5   0 1611.35   55.55
   5  -1   1 1449.87   63.25
   4  -5   1 1539.92   61.86
  -1  -4   1 1494.05   49.04
  -4   5   1 1553.01   56.31
   4  -5   1 1597.29   49.07
   1   4   1 1541.45   44.59
   5  -1   1 1566.87   34.16
  -5   1   1 1510.74   44.55
  -4   5   1 1575.74   49.00
   5  -1   1 1464.98   30.88
   1   4   1 1530.08   51.58
  -5   1   1 1482.62   61.26
  -5   1   2  878.45   36.54
  -5   1   2  842.89   37.93
   1   4   2  844.30   35.94
   4  -5   2  893.98   37.34
  -5   1   2  867.66   45.59
  -1  -4   2  874.66   40.49
   1   4   3  788.54   37.25
   4  -5   3  818.15   36.07
  -5   1   3  856.85   37.92
  -1  -4   3  845.80   42.38
  -5   1   3  788.00   42.39
  -4   5   3  730.55   19.03
   1   4   3  865.61   50.42
  -5   1   3  720.85   38.77
  -1  -4   4   58.68   13.03
   4  -5   4   59.93   10.53
   1   4   4   46.11   10.14
  -5   1   4   60.40   12.23
  -5   1   4   48.09   12.15
   1   4   4   45.31   13.65
  -5   1   5 1905.26   62.67
  -1  -4   5 1814.15   71.68
   1   4   5 1995.10   89.25
  -5   1   5 2057.37   76.37
   1   4   5 1899.38   67.85
   4  -5   5 1914.66   63.63
   4  -5   6  204.35   23.02
  -5   1   6  187.44   21.31
   1   4   6  211.38   31.51
  -5   1   6  190.71   18.93
   4  -5   6  223.56   24.57
  -1  -4   6  156.84   23.31
  -5   1   6  199.99   26.49
  -1  -4   7  442.23   41.14
   1   4   7  501.54   51.46
   4  -5   7  518.37   40.91
  -5   1   7  437.08   34.94
   4  -5   7  419.38   34.85
  -5   1   7  472.27   27.28
  -5   1   7  477.50   42.40
  -1  -4   8  123.02   15.40
  -5   1   8  149.04   13.56
   4  -5   8  181.59   25.51
  -1  -4   8  151.77   25.91
   1   4   8  161.50   31.90
   4  -5   8  154.43   25.19
  -5   1   8  124.98   23.55
   5  -1   9  129.96   29.14
  -1  -4   9  162.18   17.20
   4  -5   9  184.53   27.63
  -5   1   9  182.28   29.43
  -1  -4   9  170.28   29.23
   1   4   9  175.49   35.48
   4  -5   9  135.01   25.24
   4  -5  10  109.49   24.47
  -5   1  10  108.73   24.69
   1   4  10   92.57   26.94
   5  -1  10   56.89   22.05
  -1  -4  10   81.60   21.36
   4  -5  10  106.19   22.36
   1   4  11  -10.29   15.33
   4  -5  11   -4.23    8.64
   5  -1  11    0.58   13.67
  -1  -4  11    8.62   10.78
   4  -5  11    2.21   10.91
  -5   1  11   -1.43   11.53
   5  -1  12   10.41   13.27
   4  -5  12   31.44   16.22
   1   4  12   -1.95   10.41
   4  -5  12   22.96   12.46
  -1  -4  12   18.87   14.96
  -5   1  12   21.38   14.56
   1   4  13   11.03   16.22
   4  -5  13    3.61    7.58
  -1  -4  13   32.57   17.13
   5  -1  13    6.37   13.89
   4  -5  13   12.40   10.89
   4  -5  14  103.39   28.96
  -1  -4  14   81.11   25.69
   4  -5  14  136.08   28.24
   5  -1  14   85.06   32.16
   1   4  14  130.65   39.44
  -1  -4  15   43.45   20.87
   5  -1  15   24.23   17.39
   1   4  15   57.33   26.57
  -5   5 -16   35.58   22.19
   5  -5 -15   28.79   20.83
  -5   5 -15  -24.33   19.74
   5   0 -15  -13.81   15.03
  -5   5 -14   80.23   29.37
   5  -5 -14  158.44   39.23
   5   0 -14   99.24   32.72
   0  -5 -14   92.08   25.78
  -5   5 -13   -3.30   13.20
   0  -5 -13   -3.98   11.20
   5  -5 -13    3.68   12.46
   5  -5 -12  -12.09   16.16
   0  -5 -12   23.70   14.31
  -5   5 -12  -14.46   16.89
   5  -5 -11   30.44   17.92
  -5   5 -11   10.91   12.43
  -5   0 -11   26.28   10.50
   0  -5 -11   27.98   13.48
  -5   0 -11   11.19    7.44
   5  -5 -10  121.17   28.36
  -5   0 -10   95.65   18.04
  -5   5 -10   83.85   26.77
   0  -5 -10   96.25   20.75
  -5   0 -10  108.86   21.97
   0  -5 -10   81.04   17.92
   5   0  -9   10.93    8.24
   0  -5  -9   21.52    9.97
  -5   0  -9   21.31    8.65
  -5   0  -9   25.28   12.09
  -5   5  -9   27.74   16.98
   5  -5  -9   28.33   17.81
   0  -5  -9   30.82   13.14
  -5   0  -8  582.78   48.35
   5  -5  -8  494.88   33.56
  -5   0  -8  513.13   32.79
  -5   5  -8  533.53   42.46
  -5   0  -8  466.75   27.12
  -5   5  -8  494.77   56.16
   0  -5  -8  548.63   43.30
   5  -5  -8  565.00   53.00
   0  -5  -8  528.54   44.68
   5   0  -8  571.80   40.36
   5   0  -7  969.92   49.92
  -5   0  -7  969.28   61.23
   5  -5  -7  865.98   45.40
  -5   0  -7  873.27   32.42
   0  -5  -7  936.69   52.59
   0   5  -7  863.01   46.98
   5  -5  -7  875.35   62.46
  -5   0  -7  896.81   37.08
  -5   5  -7  911.85   54.82
  -5   0  -6  272.10   14.89
   5  -5  -6  285.89   26.54
  -5   0  -6  293.30   33.42
  -5   5  -6  279.31   30.48
   0  -5  -6  259.48   26.40
   5  -5  -6  244.16   31.92
   5   0  -6  292.57   26.03
  -5   0  -6  277.62   16.58
   0   5  -6  293.49   24.81
   5   0  -5 1216.11   54.45
  -5   0  -5 1268.98   67.70
   0   5  -5 1238.62   44.22
   5  -5  -5 1273.76   56.42
  -5   0  -5 1141.17   21.82
   5   0  -5 1264.47   50.42
  -5   5  -5 1357.52   65.08
  -5   0  -5 1226.02   23.85
   0  -5  -5 1273.01   54.57
   0  -5  -5 1223.60   48.43
   5  -5  -5 1270.20   66.45
  -5   0  -4  812.68   52.90
   5   0  -4  795.26   38.56
   0  -5  -4  783.92   40.11
   5  -5  -4  765.34   43.98
   5  -5  -4  788.59   49.60
   0   5  -4  757.49   29.01
  -5   5  -4  766.39   48.08
   0  -5  -4  759.90   38.06
   5   0  -4  784.05   44.65
   5   0  -3   50.12   11.49
   5  -5  -3   63.98   15.15
  -5   0  -3   62.96   17.38
   0  -5  -3   49.91   10.56
  -5   5  -3   64.37   10.46
  -5   5  -3   39.27   12.19
   5  -5  -3   43.75   10.90
   0  -5  -3   39.41    9.91
  -5   5  -2 2054.39   58.06
  -5   5  -2 2094.32   76.67
  -5   0  -2 1987.69   79.33
   5   0  -2 2013.30   74.11
   0  -5  -2 2026.13   55.87
   5   0  -2 1931.07   59.62
   0  -5  -2 2035.05   64.02
   5  -5  -2 1997.63   69.32
   5   0  -1   37.99    7.51
  -5   0  -1   41.76   13.37
   0  -5  -1   34.96    8.38
  -5   5  -1   34.85    8.32
  -5   0  -1   46.41    5.82
   5  -5  -1   50.90   11.71
  -5   5  -1   28.70   10.74
  -5   0   0  306.68   18.46
   5  -5   0  293.88   23.61
  -5   0   0  289.87   29.34
  -5   5   0  277.40   23.68
   0   5   0  329.66   26.61
   0   5   0  290.21   21.23
  -5   5   0  350.17   31.41
   0  -5   0  346.10   24.18
   5   0   0  300.86   18.08
   5  -5   1   70.63   11.54
   0   5   1   64.78   11.70
  -5   0   1   65.13   14.17
  -5   0   1   57.62   10.58
   0   5   1   76.05   11.82
   5   0   1   63.60    6.64
   0   5   1   67.29   11.90
   0  -5   1   57.07   10.84
   5   0   1   54.46    7.08
  -5   5   1   77.61   15.55
  -5   0   1   52.49    9.34
  -5   0   2 1887.04   60.56
  -5   0   2 1788.84   69.29
   0  -5   2 1839.33   59.88
  -5   5   2 1921.76   70.40
  -5   0   2 1845.72   58.42
   5  -5   2 1884.43   53.78
   0   5   2 1843.03   66.25
  -5   5   2 1815.14   46.62
   0   5   2 1891.11   59.93
   0   5   3   48.58   10.77
  -5   0   3   36.41    9.82
   0  -5   3   54.56   11.93
  -5   0   3   56.04   12.09
   0   5   3   51.83   13.31
   5  -5   3   51.59    9.53
  -5   0   3   42.08    9.57
   5  -5   4  683.21   34.69
   0   5   4  747.61   50.89
   0  -5   4  663.98   41.44
  -5   0   4  634.50   41.01
  -5   0   4  690.52   40.99
   5  -5   5 1195.89   49.07
   0   5   5 1222.95   70.68
   0  -5   5 1149.35   57.90
  -5   0   5 1194.65   59.62
  -5   0   5 1183.22   52.68
  -5   0   6  295.66   25.57
   5  -5   6  257.61   24.86
   0  -5   6  280.29   31.02
   0   5   6  204.17   31.34
  -5   0   6  240.98   29.11
  -5   0   7  880.13   57.82
   5  -5   7  925.03   50.45
   0  -5   7  885.45   57.35
  -5   0   7  869.02   40.54
   5  -5   7  828.43   54.63
   0   5   7  884.63   67.99
  -5   0   8  528.16   47.25
   0  -5   8  570.46   36.88
   5  -5   8  547.55   41.39
   0   5   8  589.77   59.40
   0  -5   8  586.06   49.84
  -5   0   8  562.84   29.30
   5  -5   8  520.58   46.82
   5  -5   9   24.42   11.29
   0  -5   9   -0.66   10.09
   5   0   9   10.75   12.17
  -5   0   9   26.49   13.59
   5  -5   9   34.28   13.61
   0   5   9   11.87   11.86
   5   0  10  139.63   32.55
   0   5  10  158.24   34.68
   5  -5  10  137.64   23.49
   0  -5  10   90.06   23.00
   5  -5  10  174.75   31.53
  -5   0  10  174.78   30.82
   0  -5  11   33.21   17.93
   5   0  11   34.06   20.02
   5  -5  11   51.57   15.58
   5  -5  11   17.71   14.49
   0   5  11   23.14   17.58
  -5   0  11   19.61   11.80
   5  -5  12   19.64   14.25
   5  -5  12    3.16    7.81
   5   0  12   28.89   17.86
   0  -5  12   22.98   15.71
  -5   0  12    2.04    9.77
   0   5  12   21.39   17.69
   0   5  13    2.04   13.99
   5  -5  13  -15.75   13.27
   5   0  13  -11.79   16.28
   0  -5  13   18.20   13.16
  -5   0  13   26.01   15.66
   5  -5  13    5.98    9.83
   5   0  14  145.26   41.27
   0   5  14   65.19   28.99
   0  -5  14  111.56   31.27
   5  -5  14   78.11   26.15
  -5   0  14   96.31   28.09
   5   0  15   28.59   21.89
   0  -5  15   32.39   18.33
   6  -5 -15  -33.94   21.87
   1  -6 -15    6.05   11.13
  -6   5 -15    0.59   13.47
   6  -5 -14   88.98   29.23
   1  -6 -14   30.33   17.13
  -6   5 -14   91.74   31.41
  -6   5 -13   26.50   19.94
   1  -6 -13   -8.06   12.01
   6  -5 -13    6.28   13.57
   6  -5 -12   13.17   16.67
   1  -6 -12   53.28   21.00
  -6   5 -12   24.09   13.89
   1  -6 -11   13.12   10.95
  -5  -1 -11   27.97   12.39
  -6   5 -11   -4.80   13.61
  -5  -1 -10    8.84    8.07
   1  -6 -10   -2.88   10.10
  -5  -1 -10    5.49    5.40
   5   1 -10    7.28    7.96
   1  -6 -10    1.07    5.33
   6  -5 -10   -1.32   14.06
  -6   5 -10    3.10    6.71
   6  -5  -9   64.11   23.62
  -5  -1  -9  114.12   23.31
   1  -6  -9  119.74   23.88
  -5  -1  -9  116.73   16.02
   5   1  -9  118.68   21.34
  -6   5  -9  118.77   22.39
  -5  -1  -8  571.62   30.43
  -5  -1  -8  484.74   27.50
  -6   5  -8  499.68   43.92
  -5  -1  -8  527.62   48.89
   5   1  -8  589.28   44.22
   6  -5  -8  485.10   51.73
   6  -5  -8  497.39   35.87
   1  -6  -8  643.79   48.94
   1  -6  -7  116.39   15.85
   5   1  -7  146.19   21.48
   6  -5  -7   97.79   22.22
  -5  -1  -7  161.51   14.16
  -6   5  -7  172.17   26.01
  -5  -1  -7  143.37   13.28
   1  -6  -7  155.99   23.55
  -5  -1  -7  126.89   23.73
   6  -5  -7  150.99   20.30
   5   1  -6  612.41   41.28
  -6   5  -6  595.77   46.43
  -5  -1  -6  587.86   21.21
   1  -6  -6  538.12   32.82
  -5  -1  -6  542.14   22.06
   1  -6  -6  564.36   41.63
   6  -5  -6  668.32   53.03
  -5  -1  -6  567.98   48.33
   1  -6  -5  640.09   35.67
  -5  -1  -5  564.18   48.01
   1  -6  -5  587.70   40.36
  -5  -1  -5  575.93   18.83
  -6   5  -5  613.30   46.94
   5   1  -5  625.54   39.55
   6  -5  -5  556.15   45.73
   5   1  -4  505.80   33.85
   1  -6  -4  534.59   32.99
  -6   5  -4  531.77   43.07
   1  -6  -4  497.98   34.88
   6  -5  -4  506.79   41.54
  -6   5  -4  491.42   28.65
  -5  -1  -4  491.79   43.78
   5   1  -3  579.85   35.59
   6  -5  -3  559.42   41.01
   1  -6  -3  582.09   35.43
  -5  -1  -3  527.35   14.94
  -5  -1  -3  507.32   44.53
  -6   5  -3  567.77   30.73
  -6   5  -3  607.89   45.44
   1  -6  -2  490.86   30.99
  -6   5  -2  473.53   29.44
  -6   5  -2  455.54   38.74
  -5  -1  -2  477.78   18.17
   6  -5  -2  437.23   34.06
  -5  -1  -2  440.97   40.57
   5   1  -1  909.49   37.87
  -6   5  -1 1014.16   56.71
   1  -6  -1  929.92   41.59
  -5  -1  -1  913.91   30.55
  -1   6  -1  900.36   26.78
   6  -5  -1  829.20   43.73
  -6   5  -1  930.68   43.11
  -5  -1  -1 1049.20   61.00
   6  -5   0  914.70   42.28
  -1   6   0  827.44   33.99
  -6   5   0  849.68   43.19
  -6   5   0  790.16   49.53
  -5  -1   0  898.19   35.05
   1  -6   0  854.78   39.83
   5   1   0  867.02   32.01
  -5  -1   0  911.58   55.53
  -1   6   1  878.07   42.99
  -1   6   1  801.79   38.97
   5   1   1  820.49   26.14
   6  -5   1  875.97   38.70
  -6   5   1  870.23   51.07
  -5  -1   1  808.20   37.39
  -5  -1   1  857.79   52.53
   1  -6   1  920.49   43.21
  -1   6   2  441.44   28.54
   1  -6   2  418.24   30.24
   6  -5   2  439.45   26.28
  -5  -1   2  483.08   38.87
  -6   5   2  420.55   35.41
  -1   6   2  391.30   30.97
   5   1   2  416.94   12.93
  -5  -1   2  415.77   29.94
   6  -5   3  515.54   27.80
   1  -6   3  481.11   34.55
  -1   6   3  495.94   38.38
  -5  -1   3  510.41   35.54
  -6   5   3  606.35   41.78
  -5  -1   3  505.45   38.74
  -1   6   4  380.03   37.08
  -5  -1   4  420.93   35.38
   6  -5   4  471.52   28.04
   1  -6   4  428.19   34.40
  -6   5   4  488.52   37.30
  -5  -1   4  461.65   36.54
   1  -6   5  659.46   44.97
  -1   6   5  735.32   54.82
  -5  -1   5  609.97   44.68
   6  -5   5  660.91   35.56
  -5  -1   5  684.93   43.11
  -5  -1   6  524.05   36.56
   1  -6   6  605.60   45.45
  -5  -1   6  524.63   44.23
  -1   6   6  533.10   50.14
   6  -5   6  562.35   35.01
   1  -6   7  135.88   23.55
  -5  -1   7  142.46   18.82
   6  -5   7  135.52   18.98
  -5  -1   7  155.50   26.44
  -1   6   7  128.30   27.48
   6  -5   8  589.01   41.43
  -5  -1   8  567.59   34.49
   1  -6   8  595.51   50.25
  -5  -1   8  620.84   52.98
  -1   6   8  543.69   57.29
   6  -5   8  586.93   51.88
   5   1   9  144.57   31.59
   6  -5   9  133.93   27.10
   1  -6   9   89.42   20.93
   6  -5   9  106.72   19.23
  -5  -1   9  139.45   26.96
  -1   6   9  107.30   27.11
   1  -6  10   -6.07   14.50
  -5  -1  10   16.52   11.71
   5   1  10  -11.18   16.42
   6  -5  10   26.12   14.56
  -1   6  10    1.57   13.28
   6  -5  10   19.34    9.10
  -5  -1  11   46.48   17.20
   5   1  11   37.71   18.35
   6  -5  11   24.17   14.21
  -1   6  11   50.80   22.15
   6  -5  11   22.05   10.01
   1  -6  11   28.13   14.27
   6  -5  12   63.16   22.01
   1  -6  12   45.73   20.83
   6  -5  12   39.87   13.33
  -5  -1  12   38.34   20.10
  -1   6  12   33.53   19.28
   5   1  12   51.20   23.73
  -1   6  13   28.21   20.10
   6  -5  13    5.02    9.75
   1  -6  13   31.39   17.47
   5   1  13   23.88   19.04
  -5  -1  13   38.81   19.76
   5   1  14   36.98   24.21
   6  -5  14   50.91   23.65
   1  -6  14   67.72   23.11
  -5  -1  14   68.02   23.90
   5   1  15   36.11   22.93
   1  -6  15  -15.69   14.26
   2  -6 -16    2.03    9.60
  -6   4 -15  -12.61   16.98
   2  -6 -15   18.69   16.43
   6  -4 -14    7.57   14.27
   2  -6 -14   -1.32   12.87
  -6   4 -14  -26.23   19.47
   2  -6 -13    8.68   11.55
   6  -4 -13  -15.20   15.22
  -6   4 -13   -4.04   14.25
  -6   4 -12   91.73   29.27
   6  -4 -12  167.60   37.34
   2  -6 -12  187.15   34.72
   2  -6 -11   11.68   10.09
  -4  -2 -11   20.96   10.85
   6  -4 -11   18.69   15.19
  -4  -2 -11   28.53   10.04
  -6   4 -11   20.07    9.37
  -4  -2 -10    7.86    9.00
   6  -4 -10   14.08   13.52
  -6   4 -10    8.80    7.42
   2  -6 -10    7.09    6.74
  -2   6 -10   13.89   12.05
  -4  -2 -10   -0.18    7.23
   2  -6 -10    7.85   13.25
  -4  -2  -9  296.36   26.93
  -6   4  -9  280.45   33.05
   6  -4  -9  316.22   43.62
  -2   6  -9  357.60   47.97
   2  -6  -9  324.50   38.65
  -4  -2  -9  302.84   36.42
   6  -4  -8   67.43   12.54
   2  -6  -8   80.32   20.28
   2  -6  -8   69.15   10.79
  -2   6  -8   69.71   21.74
  -4  -2  -8   61.05   17.31
   6  -4  -8   84.58   24.29
  -4  -2  -8   60.01   11.86
  -4  -2  -8   78.78   12.94
  -6   4  -8   61.79   15.96
  -6   4  -7   48.72   14.15
   6  -4  -7   33.15    9.07
   2  -6  -7   77.35   18.77
  -4  -2  -7   57.19   10.19
   6  -4  -7   45.18   17.03
  -2   6  -7   43.52   17.94
   2  -6  -7   42.34    8.34
  -4  -2  -7   50.66    9.35
  -4  -2  -7   57.24   16.92
  -6   4  -7   50.69    9.25
  -6   4  -6  312.75   22.27
   6  -4  -6  342.45   38.43
   2  -6  -6  359.55   23.86
   4   2  -6  336.28   32.48
   2  -6  -6  351.80   34.47
  -4  -2  -6  312.37   35.26
  -4  -2  -6  341.57   21.54
  -2   6  -6  323.35   39.83
  -6   4  -6  333.70   34.91
   6  -4  -6  341.73   29.78
  -4  -2  -6  331.93   20.20
   2  -6  -5   60.47   15.18
  -6   4  -5   50.52    8.69
  -4  -2  -5   61.74    8.18
  -4  -2  -5   61.15   15.78
   6  -4  -5   68.47   13.58
   6  -4  -5   79.49   18.69
   2  -6  -5   83.10   11.74
  -4  -2  -5   72.57    8.23
   4   2  -5   69.56   15.16
  -6   4  -5   39.09   13.07
  -4  -2  -4  532.53   44.75
  -4  -2  -4  521.60   16.85
   4   2  -4  538.83   37.00
   6  -4  -4  531.35   38.17
  -6   4  -4  465.02   39.31
   6  -4  -4  481.64   40.43
  -6   4  -4  543.49   26.64
   2  -6  -4  558.01   38.29
  -4  -2  -3 5353.54   62.95
  -6   4  -3 5363.18   85.19
   6  -4  -3 5339.40  123.55
   2  -6  -3 5581.86  112.08
  -6   4  -3 5309.29  130.68
   4   2  -3 5441.45  111.25
  -4  -2  -3 5461.17  137.24
   2  -6  -2  228.23   23.09
  -4  -2  -2  266.83   15.40
  -4  -2  -2  291.63   33.17
  -6   4  -2  220.00   26.60
   2  -6  -2  195.55   20.71
   4   2  -2  227.68   22.13
  -6   4  -2  236.36   19.08
   6  -4  -2  236.33   24.94
   6  -4  -1   17.68    8.98
   4   2  -1   18.44    5.53
  -4  -2  -1   11.01    4.21
   2  -6  -1   11.12    5.12
  -6   4  -1   11.46    8.13
  -6   4  -1    0.18    2.98
  -4  -2  -1    5.71    9.47
   2  -6  -1   11.08    7.60
   2  -6   0  766.55   43.79
   2  -6   0  805.43   38.29
  -6   4   0  852.94   50.06
  -4  -2   0  803.19   33.28
  -4  -2   0  779.38   49.95
  -6   4   0  805.55   40.15
   4   2   0  766.77   30.07
   6  -4   0  781.50   37.13
  -2   6   1   19.61    6.81
   2  -6   1    8.24    5.23
  -6   4   1   22.43   10.18
  -4  -2   1   13.49    8.02
   2  -6   1   11.07    5.61
  -6   4   1   22.69    7.92
   4   2   1   14.87    3.94
  -4  -2   1   14.10    6.20
   6  -4   1   22.59    7.57
   4   2   2  245.00   13.46
  -6   4   2  262.10   26.97
  -4  -2   2  219.39   21.57
  -2   6   2  260.45   24.28
  -4  -2   2  228.95   26.47
   6  -4   2  261.54   18.28
   2  -6   2  267.64   23.91
  -2   6   2  243.31   20.15
  -6   4   3 5728.52  122.96
   4   2   3 5438.89   64.20
   6  -4   3 5443.01   77.83
  -2   6   3 5438.09  123.35
  -4  -2   3 5813.85  129.28
  -4  -2   3 5550.13  115.51
   2  -6   3 5667.36  111.43
  -2   6   4  482.25   40.52
   6  -4   4  542.71   26.31
  -4  -2   4  559.87   39.75
  -6   4   4  514.58   36.35
  -4  -2   4  451.83   36.02
   2  -6   4  515.42   36.07
  -4  -2   5   87.91   16.33
   2  -6   5   65.40   14.02
   6  -4   5   70.94   10.64
  -6   4   5   71.75    7.27
  -6   4   5   67.35   13.74
  -2   6   5   49.25   15.31
  -4  -2   5   61.99   15.94
  -4  -2   6  305.91   27.90
   6  -4   6  389.14   26.31
   2  -6   6  357.52   33.61
  -6   4   6  328.44   28.74
  -4  -2   6  368.45   36.92
  -2   6   6  320.90   38.49
  -4  -2   7   41.21   14.42
  -4  -2   7   38.80   10.10
   6  -4   7   37.85    9.57
   2  -6   7   49.59   15.26
  -2   6   7   60.58   20.76
  -4  -2   8   67.58   11.99
   4   2   8   76.91   24.03
   2  -6   8   70.65   19.10
   6  -4   8   80.97   14.46
  -2   6   8   78.61   21.37
  -4  -2   8   75.69   20.68
   6  -4   9  304.70   29.53
   4   2   9  302.58   45.20
  -2   6   9  233.14   38.20
  -4  -2   9  309.42   21.90
   6  -4   9  281.94   39.35
   2  -6   9  258.74   35.31
  -4  -2   9  245.77   35.85
  -2   6  10   14.55   15.22
   2  -6  10   -1.48    8.72
  -4  -2  10   -1.62   10.95
   4   2  10   15.29   14.73
   6  -4  10   29.24   15.18
   6  -4  10    7.30    7.45
   6  -4  11   13.31    7.86
   4   2  11    3.90   12.24
   6  -4  11   32.41   15.89
   2  -6  11   40.27   16.64
  -4  -2  11   13.90   11.71
   6  -4  12  116.58   29.84
   4   2  12  161.73   38.96
   2  -6  12  165.97   33.26
  -4  -2  12  149.73   31.96
   4   2  13   -7.77   15.66
   6  -4  13   -8.12   11.84
   2  -6  13   27.91   16.44
  -4  -2  13   -0.97   10.26
   6  -4  14   -6.64   12.53
   4   2  14    0.08   13.69
   2  -6  14  -15.98   13.10
  -4  -2  14  -26.79   16.71
   4   2  15    2.69   14.83
   6  -4  15   16.56   15.50
   2  -6  15   31.07   20.40
  -4  -2  15   20.39   14.48
   2  -6  16  -11.09   11.54
   3  -6 -16   43.48   20.81
  -6   3 -16    0.09   15.43
   6  -3 -15  -14.21   14.93
  -6   3 -15  -18.18   17.81
   3  -6 -15  -23.98   16.45
  -3   6 -14    4.44   13.52
   3  -6 -14   45.57   21.45
   6  -3 -14   46.21   23.02
  -6   3 -14   27.61   20.46
   3  -6 -13   11.27    9.85
  -3   6 -13    0.27    9.90
   3  -6 -12   44.85   19.80
  -3   6 -12   34.34   19.35
   6  -3 -12   51.89   24.26
  -3  -3 -11   89.63   19.83
  -3   6 -11   77.51   25.52
  -3  -3 -11   78.37   17.64
  -6   3 -11   77.12   17.77
   3  -6 -11   79.63   23.29
   6  -3 -11   84.37   26.84
  -3  -3 -10   74.93   16.08
  -6   3 -10   59.80   16.25
   3  -6 -10   90.68   23.21
  -3  -3 -10   47.88   15.67
   6  -3 -10   78.21   24.09
  -3   6 -10   76.79   24.48
  -6   3  -9  563.81   46.68
   6  -3  -9  514.90   26.55
  -3  -3  -9  598.14   49.90
   6  -3  -9  596.66   61.27
  -3   6  -9  502.45   56.77
   3  -6  -9  555.82   52.27
  -3  -3  -9  525.30   38.37
  -6   3  -8  731.22   53.10
   6  -3  -8  795.87   31.06
  -3  -3  -8  734.47   55.10
   6  -3  -8  719.09   37.96
  -6   3  -8  752.95   35.02
   3  -6  -8  730.26   28.90
   6  -3  -8  790.53   66.56
  -3   6  -8  727.42   65.03
  -3  -3  -8  808.57   43.46
   3  -6  -8  805.75   59.36
   6  -3  -7  555.47   35.73
  -6   3  -7  545.98   27.05
   6  -3  -7  507.57   50.48
   3  -6  -7  532.01   45.66
  -3  -3  -7  587.24   48.55
  -3  -3  -7  488.54   31.38
  -3   6  -7  531.46   53.90
  -6   3  -7  598.91   46.83
  -3  -3  -7  591.38   34.26
   3  -6  -7  542.46   24.30
  -3  -3  -6  145.04   15.90
  -6   3  -6  117.07   12.19
   6  -3  -6  141.93   18.80
  -3   6  -6  161.25   29.34
   3  -6  -6  155.19   24.16
   6  -3  -6  168.74   28.48
  -3  -3  -6  124.17   14.31
  -6   3  -6  142.16   23.66
  -3  -3  -6  129.65   23.11
   6  -3  -5  491.07   44.15
   3  -6  -5  532.97   41.22
  -6   3  -5  455.19   21.86
   6  -3  -5  516.97   36.79
  -3   6  -5  505.19   47.73
  -3  -3  -5  480.05   42.06
  -6   3  -5  478.72   40.71
  -3  -3  -5  493.11   25.27
  -3  -3  -4 1267.59   35.47
   3  -6  -4 1256.13   59.65
   3   3  -4 1251.53   59.05
   6  -3  -4 1186.03   63.52
  -3   6  -4 1216.00   68.34
  -6   3  -4 1164.51   34.13
  -6   3  -4 1196.89   62.83
   6  -3  -4 1185.85   56.87
  -3  -3  -4 1155.11   64.11
  -6   3  -3   98.16   10.66
  -3  -3  -3  114.78   10.32
   3  -6  -3   94.65   17.79
   3   3  -3  129.59   19.23
   6  -3  -3   81.48   17.50
   6  -3  -3  106.60   17.63
  -6   3  -3  105.38   19.75
  -3   6  -3  108.61   20.99
  -3  -3  -3  122.57   22.30
   3  -6  -2   66.44   12.86
  -3  -3  -2   80.55   16.77
  -6   3  -2   66.78    9.34
  -3   6  -2   78.37   16.74
   3   3  -2   55.02   11.64
   3  -6  -2   69.82   11.30
  -3  -3  -2   75.73    9.35
   3  -6  -2   88.15   15.27
  -6   3  -2   70.58   15.41
   6  -3  -2   61.70   13.02
   6  -3  -2   89.27   13.43
   3   3  -1  339.23   27.14
  -6   3  -1  312.77   30.52
   3   3  -1  361.64   23.40
   3  -6  -1  352.49   26.86
  -6   3  -1  372.55   23.58
  -3  -3  -1  343.25   20.61
   3  -6  -1  378.85   27.02
   6  -3  -1  316.92   22.90
  -3  -3  -1  384.62   35.11
   6  -3  -1  325.36   25.50
   3  -6  -1  357.42   27.25
   6  -3   0   44.34    9.81
   3   3   0   44.88    7.87
   3  -6   0   53.58    8.87
  -3  -3   0   61.90   14.29
  -3  -3   0   31.24    7.19
  -6   3   0   24.01    9.18
  -6   3   0   45.56    9.30
   3  -6   0   39.98   10.16
   3  -6   0   29.81    8.50
   3  -6   1  264.09   26.93
  -3  -3   1  291.96   29.77
   3  -6   1  284.25   23.40
  -6   3   1  285.42   28.56
   3  -6   1  268.75   15.57
  -3  -3   1  294.12   22.82
  -6   3   1  292.78   25.38
   6  -3   1  284.01   19.08
   3   3   1  282.25   17.08
  -6   3   2   51.31   12.49
   6  -3   2   67.22    8.59
  -3  -3   2   76.69   16.10
  -3  -3   2   70.49   12.63
   3  -6   2   69.10   12.12
  -3   6   2   63.83    9.96
   3   3   2   68.41    8.87
  -3   6   3   96.23   10.91
  -6   3   3  121.02   18.61
  -3  -3   3  128.72   20.17
   3  -6   3  135.87   17.44
   3   3   3  102.19   11.54
   6  -3   3  110.14    9.09
  -3  -3   3  125.41   18.43
  -6   3   3  113.94   12.07
   3  -6   4 1130.44   31.89
  -3  -3   4 1293.54   60.19
   3  -6   4 1109.74   50.77
   6  -3   4 1200.42   31.77
  -6   3   4 1105.85   52.58
  -3  -3   4 1198.08   57.41
   3   3   4 1171.62   40.71
   3  -6   5  441.96   25.01
   3  -6   5  393.65   32.20
   3   3   5  391.61   25.92
  -6   3   5  403.65   31.14
   6  -3   5  408.37   21.02
  -3  -3   5  396.76   36.02
  -3  -3   5  417.91   34.08
  -6   3   6  162.97   19.54
   6  -3   6  169.22   15.59
   3  -6   6  173.38   23.40
   3  -6   6  179.19   18.97
  -3  -3   6  182.50   27.16
   3   3   6  159.27   29.35
  -6   3   6  136.59   14.53
  -3  -3   6  153.79   20.63
   3  -6   7  508.22   41.67
  -3  -3   7  601.31   49.10
   6  -3   7  572.63   31.22
  -6   3   7  531.04   33.96
   3   3   7  567.33   55.78
   3  -6   7  614.82   39.39
  -3  -3   7  606.57   38.20
  -6   3   7  531.19   30.06
   3  -6   8  822.35   56.63
  -3  -3   8  743.28   39.43
   6  -3   8  790.19   39.99
  -3  -3   8  850.29   61.27
   3   3   8  710.58   65.30
   3  -6   8  851.53   50.96
   3   3   9  565.30   62.63
   6  -3   9  492.65   34.24
  -3  -3   9  522.27   51.27
   3  -6   9  550.10   48.96
   6  -3   9  494.90   53.25
   3  -6   9  572.54   45.76
  -3  -3   9  508.12   29.07
   3  -6  10  108.85   24.35
   6  -3  10   98.60   16.80
   3   3  10   80.47   23.80
   6  -3  10  101.48   27.79
  -3  -3  10   90.10   23.15
   3  -6  11   54.42   17.87
  -3  -3  11   74.06   22.47
   6  -3  11   29.78   17.71
   3   3  11   98.63   30.14
   6  -3  11   78.06   15.67
   3  -6  12   55.11   19.11
  -3  -3  12   40.33   18.61
   3   3  12   55.01   25.58
   6  -3  12   51.55   22.57
  -3  -3  13    4.37   13.03
   3   3  13   26.17   20.89
   3  -6  13   13.86   12.65
   6  -3  13  -16.43   16.19
   6  -3  14   32.63   19.97
   3   3  14   61.85   26.06
   3  -6  14   22.14   14.55
  -3  -3  14   65.98   22.91
   6  -3  15   24.50   20.12
   3  -6  15    3.17   10.41
   3   3  15   -1.35   11.35
  -3  -3  15   37.68   19.86
   6  -3  16   20.23   18.25
   3  -6  16  -27.89   15.87
  -6   2 -16   13.41   14.71
  -6   2 -15   24.65   18.66
  -4   6 -15   15.08   14.84
   4  -6 -15   25.51   18.16
   6  -2 -14  -11.89   16.04
  -4   6 -14   30.34   20.31
   4  -6 -14  -20.55   17.40
   6  -2 -13   11.99   12.26
  -4   6 -13   -4.97   15.00
   4  -6 -13    5.87   12.23
  -4   6 -12   68.21   27.85
  -2  -4 -12   87.16   20.20
   4  -6 -12   85.68   26.57
   6  -2 -12   21.94   17.14
  -2  -4 -11   36.60   13.95
  -6   2 -11   37.38   13.51
  -2  -4 -11   19.87    9.95
   4  -6 -11   15.43   13.68
  -4   6 -11   40.41   20.55
   6  -2 -11   46.49   24.55
  -2  -4 -10    5.80    8.26
  -2  -4 -10   15.44   10.24
   6  -2 -10    4.50    4.41
   6  -2 -10   14.59   13.88
   4  -6 -10   11.14   12.78
  -6   2 -10    0.16    5.74
  -4   6 -10   14.20   13.35
   6  -2  -9 1181.22   48.10
  -2  -4  -9 1151.90   69.14
  -4   6  -9 1058.20   84.11
  -6   2  -9 1165.52   68.95
   6  -2  -9 1123.35   85.38
   4  -6  -9 1237.10   79.27
  -2  -4  -9 1088.64   57.79
  -4   6  -8  272.15   41.91
   4  -6  -8  283.66   37.24
   6  -2  -8  270.75   23.33
  -6   2  -8  205.67   17.15
   6  -2  -8  298.33   23.96
  -6   2  -8  248.05   32.21
  -2  -4  -8  224.78   31.11
  -2  -4  -8  251.53   26.48
   6  -2  -8  345.00   46.15
   6  -2  -7  158.25   16.74
   6  -2  -7  154.69   29.42
  -6   2  -7  113.77   11.03
  -2  -4  -7   86.73   15.01
  -6   2  -7  109.59   21.01
  -2  -4  -7   97.86   19.91
   4  -6  -7  111.74   23.34
  -4   6  -7  122.83   27.81
   6  -2  -7  196.86   21.59
  -6   2  -6  786.14   54.02
   4  -6  -6  827.74   55.53
  -4   6  -6  883.53   67.10
  -2  -4  -6  851.53   41.76
  -6   2  -6  731.28   25.96
   6  -2  -6  769.82   59.42
  -2  -4  -6  844.29   57.22
   6  -2  -6  787.19   44.04
  -2  -4  -5   67.26   11.42
  -6   2  -5   78.34    7.69
  -2  -4  -5   94.52   20.67
   6  -2  -5   71.79   14.15
  -6   2  -5   86.30   20.28
  -4   6  -5   67.87   18.47
   4  -6  -5   86.16   19.01
   6  -2  -5   83.08   19.48
  -6   2  -4  236.70   12.48
  -2  -4  -4  224.51   17.88
   6  -2  -4  210.93   24.16
  -6   2  -4  235.23   28.90
   4  -6  -4  202.44   13.23
   6  -2  -4  237.41   29.02
  -2  -4  -4  210.93   28.35
   4  -6  -4  247.42   28.42
  -4   6  -4  197.24   29.76
   2   4  -3 2185.09   78.28
   4  -6  -3 2199.59   77.21
  -6   2  -3 2176.61   85.85
  -2  -4  -3 2287.60   53.10
  -4   6  -3 2171.66   87.25
  -6   2  -3 2158.12   38.50
   6  -2  -3 2178.81   79.72
   6  -2  -3 2170.03   78.37
   4  -6  -3 2127.07   50.64
  -6   2  -2  538.62   42.14
   4  -6  -2  577.63   37.75
   4  -6  -2  537.06   29.29
   6  -2  -2  587.57   34.38
  -4   6  -2  534.80   40.62
   6  -2  -2  583.69   38.21
   4  -6  -2  617.48   41.15
  -6   2  -2  542.10   22.23
   2   4  -2  536.03   37.25
  -2  -4  -2  537.18   25.49
   4  -6  -1  297.18   25.37
  -6   2  -1  330.07   32.47
   2   4  -1  318.45   27.66
  -2  -4  -1  330.45   21.85
  -4   6  -1  305.39   29.20
   6  -2  -1  324.28   22.89
   4  -6  -1  236.35   21.88
   6  -2  -1  335.44   25.95
   4  -6   0 1807.27   58.37
   2   4   0 1744.36   61.29
  -6   2   0 1750.43   72.54
  -2  -4   0 1780.29   52.75
   6  -2   0 1718.28   46.59
   2   4   0 1727.35   48.02
  -4   6   0 1723.32   62.99
   6  -2   0 1688.31   50.01
  -6   2   1  302.75   30.33
   2   4   1  327.46   20.76
  -2  -4   1  308.71   23.97
   6  -2   1  303.50   17.83
   6  -2   1  295.31   16.32
   4  -6   1  307.79   24.40
  -2  -4   2  596.58   35.65
   4  -6   2  572.02   33.17
   6  -2   2  582.43   19.39
   2   4   2  563.15   28.54
  -6   2   2  582.38   40.54
   6  -2   2  554.81   17.61
  -6   2   3 2335.80   78.95
  -4   6   3 2267.57   45.20
   2   4   3 2246.01   61.23
  -2  -4   3 2097.16   70.86
   4  -6   3 2202.51   65.34
  -6   2   3 2143.76   58.91
  -2  -4   4  184.21   23.19
   4  -6   4  212.30   21.97
   2   4   4  206.17   20.11
  -6   2   4  187.75   22.70
  -6   2   4  204.72   23.60
   4  -6   5   80.41   12.69
   4  -6   5   90.98   15.97
   6  -2   5   83.71    6.91
  -2  -4   5   60.13   14.86
  -6   2   5   59.11   12.26
   2   4   5   86.36   14.25
  -6   2   5   73.35   15.99
   2   4   5   70.42   18.00
  -2  -4   6  814.73   53.85
   4  -6   6  779.23   47.20
   2   4   6  749.96   43.81
   4  -6   6  840.18   44.54
  -6   2   6  790.58   42.45
   2   4   6  766.65   60.95
   6  -2   6  761.19   26.12
  -6   2   6  802.35   52.14
  -6   2   7  195.43   20.88
   4  -6   7   98.36   18.96
  -6   2   7  168.70   20.50
   2   4   7  102.32   26.14
   6  -2   7  113.60   11.99
   4  -6   7  126.48   19.63
  -2  -4   7  103.83   21.72
  -2  -4   7  111.12   17.56
  -6   2   7  209.12   28.41
  -2  -4   8  230.43   23.94
   2   4   8  236.07   39.19
   4  -6   8  241.67   30.44
   4  -6   8  249.23   29.98
  -6   2   8  359.96   25.87
  -6   2   8  300.47   28.68
   6  -2   8  226.57   19.00
  -6   2   8  393.21   41.20
  -2  -4   8  245.59   33.68
  -2  -4   9 1006.38   45.90
   4  -6   9 1088.76   66.66
   4  -6   9 1183.00   69.87
   2   4   9 1159.42   89.27
  -2  -4   9 1186.63   75.89
   6  -2   9 1084.78   79.56
  -6   2   9 1230.91   75.10
   6  -2  10    5.87   11.72
   2   4  10    6.78   12.98
   4  -6  10   -1.83    7.14
   4  -6  10    4.29    8.85
  -2  -4  10   14.97   13.15
   6  -2  11   17.57   16.49
   2   4  11   45.54   23.13
  -2  -4  11   20.57   12.68
   4  -6  11   45.09   16.89
   4  -6  11   21.25   12.18
   6  -2  12  105.23   31.11
   2   4  12   83.83   28.60
   4  -6  12   94.84   24.81
   4  -6  12   55.46   17.90
  -2  -4  12   66.88   21.99
   2   4  13   16.06   17.73
   4  -6  13   14.87   11.86
   6  -2  13   12.51   12.28
  -2  -4  13   12.49   14.08
   2   4  14   20.34   19.91
   6  -2  14   27.12   19.79
   4  -6  14   11.09   10.04
  -2  -4  14   22.55   16.75
   6  -2  15    8.06   12.73
   4  -6  15    7.63   11.26
  -2  -4  15   16.08   15.84
  -6   1 -16  -16.80   15.67
   5  -6 -15  -21.48   18.18
  -5   6 -15   -4.75   12.18
   6  -1 -14   25.71   20.85
   5  -6 -14   64.40   25.73
  -5   6 -14   40.57   22.88
   6  -1 -13   -0.28   15.83
  -5   6 -13  -17.56   16.99
   5  -6 -13    6.48   19.00
  -1  -5 -13   20.72   13.66
  -1  -5 -12   -0.84    7.38
  -5   6 -12   21.36   18.58
   5  -6 -12  -16.71   17.26
   6  -1 -12  -29.06   19.73
   5  -6 -11   62.38   21.99
  -6   1 -11   60.27   17.20
  -1  -5 -11   70.46   18.80
   6  -1 -11   54.56   25.94
  -5   6 -11   34.78   18.40
  -6   1 -10   58.23   13.66
  -6   1 -10   48.24   15.10
  -1  -5 -10   68.87   17.29
  -1  -5 -10   64.97   18.26
   5  -6 -10  112.90   28.21
   6  -1 -10   60.22   13.21
  -5   6 -10   62.61   21.75
   6  -1  -9  394.19   31.88
   5  -6  -9  392.59   46.61
  -6   1  -9  380.76   41.28
  -1  -5  -9  375.90   40.32
  -6   1  -9  385.32   30.23
  -5   6  -9  404.29   53.01
  -1  -5  -9  424.94   38.38
   6  -1  -8  360.07   29.43
  -6   1  -8  307.72   24.62
  -5   6  -8  391.80   51.18
  -6   1  -8  395.16   41.46
   5  -6  -8  358.42   42.31
  -1  -5  -8  364.56   33.99
  -1  -5  -8  270.71   34.60
  -5   6  -7 1073.53   79.58
   6  -1  -7  970.73   45.39
  -6   1  -7 1015.43   64.72
  -1  -5  -7  988.99   64.06
  -6   1  -7  935.25   27.69
   6  -1  -7  878.11   45.73
   1   5  -7  939.44   52.56
  -6   1  -7  874.78   35.30
   5  -6  -7  930.85   64.11
  -1  -5  -7  830.84   47.92
  -6   1  -6  766.27   55.42
  -6   1  -6  686.62   19.67
   5  -6  -6  715.38   53.29
  -6   1  -6  726.28   25.36
  -6   1  -6  657.99   16.28
   1   5  -6  747.82   42.10
   6  -1  -6  775.14   39.12
   6  -1  -6  777.08   45.16
  -1  -5  -6  718.27   41.59
  -5   6  -6  878.95   68.78
  -6   1  -5  708.79   52.76
   6  -1  -5  704.67   44.52
  -1  -5  -5  735.64   39.45
  -5   6  -5  780.18   61.55
   5  -6  -5  726.37   51.06
   1   5  -5  728.85   36.88
  -5   6  -4  418.79   42.63
   5  -6  -4  458.70   39.33
  -1  -5  -4  385.46   26.75
  -6   1  -4  400.91   39.36
  -6   1  -3 1215.65   66.69
  -5   6  -3 1368.20   65.82
  -1  -5  -3 1291.30   45.67
   5  -6  -3 1293.25   60.78
  -5   6  -3 1267.55   69.27
  -6   1  -2  186.33   25.28
   5  -6  -2  179.55   22.59
   6  -1  -2  175.98   19.05
  -1  -5  -2  201.89   17.72
   1   5  -2  156.87   21.82
  -5   6  -2  135.31   21.80
  -1  -5  -1  612.46   30.96
   5  -6  -1  609.90   37.32
   6  -1  -1  619.35   35.84
   1   5  -1  603.17   39.48
  -5   6  -1  648.95   42.71
  -6   1  -1  744.58   50.14
   6  -1  -1  598.90   31.35
   6  -1   0   18.72    6.35
  -6   1   0    4.67    7.76
   6  -1   0    9.97    4.36
  -1  -5   0   12.58    7.25
   5  -6   0    7.07    7.46
   1   5   0    0.86    6.12
  -5   6   0    9.51    7.54
   1   5   1  539.74   29.93
   6  -1   1  483.51   19.79
   5  -6   1  530.65   31.83
  -5   6   1  574.19   33.58
   1   5   1  502.33   32.98
  -6   1   1  510.84   28.01
   6  -1   1  540.68   22.86
  -1  -5   1  537.08   32.63
  -6   1   1  528.22   40.43
   6  -1   2  169.69    8.34
  -6   1   2  161.01   17.81
   5  -6   2  186.44   18.92
  -6   1   2  190.63   19.26
  -1  -5   2  191.58   20.67
  -6   1   2  151.26   21.83
   1   5   2  162.44   17.35
  -6   1   3 1301.27   52.00
   5  -6   3 1293.02   49.01
  -1  -5   3 1348.31   57.71
  -6   1   3 1228.30   59.77
  -6   1   3 1204.94   52.69
   1   5   3 1353.83   53.34
   1   5   3 1379.97   66.89
  -6   1   4  274.36   28.30
   1   5   4  352.30   37.08
  -6   1   4  302.85   28.80
  -1  -5   4  310.10   29.68
   5  -6   4  340.63   26.51
   5  -6   5  669.25   39.64
  -1  -5   5  634.04   44.97
   1   5   5  665.11   53.93
  -6   1   5  697.49   46.68
  -6   1   5  588.40   39.68
   5  -6   6  792.75   46.72
  -6   1   6  781.32   44.23
  -1  -5   6  824.82   54.20
  -6   1   6  784.15   51.99
   1   5   6  855.13   65.63
  -6   1   7  896.78   44.80
   5  -6   7  945.37   54.32
  -1  -5   7  876.06   59.35
   5  -6   7  963.74   55.89
  -6   1   7  919.21   59.90
   1   5   7  990.92   74.55
   1   5   8  374.86   49.02
   5  -6   8  366.98   36.10
  -1  -5   8  389.63   41.74
  -6   1   8  376.72   26.43
   5  -6   8  305.27   34.58
  -6   1   8  346.11   39.19
   5  -6   9  326.00   37.03
   5  -6   9  405.70   42.90
  -6   1   9  417.99   45.01
   6  -1   9  356.17   47.37
  -1  -5   9  353.87   42.59
   1   5   9  391.57   53.11
   1   5  10  117.59   33.28
   6  -1  10   85.42   26.60
   5  -6  10  109.61   24.04
   5  -6  10   84.23   19.71
  -1  -5  10   57.76   19.08
  -6   1  10  103.14   25.38
   1   5  11   45.54   20.86
   5  -6  11   61.26   19.04
   6  -1  11  101.56   27.44
   5  -6  11   67.42   18.77
  -1  -5  11   39.62   16.74
  -6   1  11   86.89   24.45
   6  -1  12    6.39   15.62
   5  -6  12   10.99   12.09
  -6   1  12   -7.37   12.71
   1   5  12  -21.37   18.62
   5  -6  12  -14.31   11.59
  -1  -5  12   14.02   14.26
   6  -1  13  -18.70   16.55
   5  -6  13   -3.34    8.08
   1   5  13   16.39   17.81
  -1  -5  13   -7.66   13.76
   6  -1  14   71.19   31.63
  -1  -5  14   38.60   19.64
   1   5  14   88.62   32.57
   6  -1  15  -15.14   16.61
  -1  -5  15   -0.71   10.46
  -6   6 -15   42.18   26.39
  -6   6 -14   16.50   19.69
   6   0 -14    7.02   17.33
   6  -6 -14    0.07   12.45
   6  -6 -13    1.05   13.39
  -6   6 -13   -0.76   13.98
   0  -6 -12  104.86   26.02
   6  -6 -12   63.87   24.45
  -6   6 -12  106.27   33.55
   6   0 -11   11.82    7.22
  -6   0 -11    8.16    9.04
   6  -6 -11   13.63   15.39
  -6   6 -11   -0.93   12.89
   6  -6 -10   13.65   14.45
   0  -6 -10    4.80   10.06
   0  -6 -10   10.09    9.34
   6   0 -10   -1.74    9.00
  -6   0 -10   10.56   10.25
  -6   6 -10   19.52   13.59
  -6   0  -9 1099.82   72.27
   6   0  -9  977.77   55.13
  -6   6  -9  917.59   82.21
   0  -6  -9 1029.40   67.61
   6  -6  -9  891.54   71.22
  -6   0  -9  951.83   41.90
   0  -6  -9  889.74   58.33
   0  -6  -8  187.86   29.22
  -6   0  -8  202.42   31.70
   6   0  -8  198.40   23.98
  -6   6  -8  166.42   34.61
   6  -6  -8  163.15   30.32
  -6   6  -8  206.74   29.85
   0  -6  -8  160.85   24.59
  -6   0  -8  201.46   16.50
   0  -6  -7   46.42   14.40
   6  -6  -7   33.10   14.34
  -6   0  -7   20.31   11.20
  -6   6  -7   66.07   23.26
  -6   0  -7   44.73    5.86
   6   0  -7   66.12   14.38
   0   6  -7   51.36   11.29
  -6   6  -7   66.33   16.68
  -6   0  -7   53.84    6.90
   6  -6  -6 1240.53   72.50
   0  -6  -6 1104.99   55.34
  -6   6  -6 1239.87   68.68
   0   6  -6 1171.65   45.82
   6   0  -6 1164.71   53.16
  -6   0  -6 1025.28   66.92
   0  -6  -5  280.89   26.78
   6   0  -5  266.69   25.06
   0   6  -5  218.01   17.44
   6  -6  -5  271.16   32.52
  -6   0  -5  259.85   34.30
  -6   6  -5  229.17   29.81
  -6   0  -4  148.02   25.58
   6  -6  -4  212.21   28.26
   0   6  -4  180.00   13.37
   0  -6  -4  186.14   21.40
  -6   6  -4  185.05   26.51
  -6   0  -3  927.25   61.09
   0  -6  -3  949.94   43.64
  -6   6  -3  926.69   57.74
   6  -6  -3  941.03   54.47
   0  -6  -2 1105.60   45.21
  -6   0  -2 1002.49   62.71
  -6   6  -2  974.44   57.96
   6  -6  -2  998.76   52.24
  -6   0  -1 1228.28   68.14
   0   6  -1 1332.66   61.45
   0  -6  -1 1290.51   49.21
   6  -6  -1 1352.24   57.40
   6   0  -1 1281.99   46.17
  -6   6  -1 1342.81   67.68
  -6   0  -1 1289.96   34.13
  -6   0   0 2927.20  102.95
   0   6   0 2859.89   84.52
   6   0   0 2873.43   60.47
   6  -6   0 2757.71   77.13
  -6   6   0 2916.38   97.49
   0   6   0 2827.79   69.10
  -6   0   0 2699.28   59.94
   0  -6   0 2844.79   75.58
  -6   0   1 1248.50   46.25
  -6   0   1 1274.44   66.38
   0  -6   1 1263.15   52.26
   6  -6   1 1339.90   50.78
   0   6   1 1284.80   54.39
  -6   6   1 1240.76   63.55
   6   0   1 1261.20   32.67
  -6   6   1 1182.14   49.98
   0   6   1 1247.58   52.05
   6   0   1 1195.99   36.77
   6  -6   2  929.39   42.01
  -6   6   2  942.75   54.98
   0  -6   2  919.38   46.29
   0   6   2  954.22   45.85
  -6   6   2  960.98   40.15
  -6   0   2  931.25   44.48
   0   6   2  998.70   51.60
  -6   0   2 1030.01   58.44
  -6   0   3  973.66   55.23
   6  -6   3  973.17   42.83
  -6   0   3  909.29   47.82
   0   6   3 1010.81   57.52
  -6   6   3  978.57   32.00
   0  -6   3  985.79   50.95
  -6   0   4  195.52   25.26
   6  -6   4  178.70   19.70
   0  -6   4  193.05   24.41
   0   6   4  165.19   25.81
  -6   0   4  171.14   22.74
  -6   0   5  226.02   26.24
   0  -6   5  271.03   30.60
  -6   0   5  217.86   27.65
   6  -6   5  247.04   23.60
   0   6   5  237.49   33.60
   6  -6   6 1204.75   55.65
  -6   0   6 1041.60   54.03
   0   6   6 1205.63   78.56
  -6   0   6 1197.79   66.51
   0  -6   6 1201.91   65.71
   0   6   7   38.43   17.74
   0  -6   7   97.19   20.91
  -6   0   7   43.00   10.99
  -6   0   7   44.82   16.24
   6  -6   7   60.80   14.80
  -6   0   8  187.32   20.81
   6  -6   8  207.88   30.24
   0   6   8  223.83   38.88
   0  -6   8  185.18   29.90
   6  -6   8  241.83   28.30
  -6   0   8  182.45   30.18
   6  -6   9  849.98   56.24
   0   6   9  870.44   77.72
   0  -6   9  917.69   67.69
   6  -6   9  913.28   65.91
  -6   0   9 1043.05   72.18
   6   0   9  790.81   72.48
   6  -6  10   13.77   12.61
   0   6  10   21.46   16.64
   0  -6  10   10.35   10.55
   6  -6  10   -3.31    7.17
   6   0  10   -2.42   15.72
  -6   0  10   15.22    9.99
   6  -6  11   -7.82   10.59
   0  -6  11   29.02   15.10
   6   0  11   20.00   13.61
  -6   0  11   -2.15   13.53
   0   6  11    8.62   12.90
   6  -6  11    7.62    8.39
   6  -6  12   75.28   24.84
   6   0  12  118.99   34.17
   6  -6  12  111.69   23.43
   0  -6  12   95.13   26.44
  -6   0  12   99.39   26.39
   0   6  12   87.51   29.29
   6  -6  13    5.74    9.56
   0  -6  13   20.71   16.97
  -6   0  13   17.39   16.14
   0   6  13    1.31   10.70
   6   0  13   -1.14   13.04
   0   6  14    4.19   18.46
   6   0  14   -0.67   11.33
   0  -6  14   31.80   18.61
  -6   0  14   13.53   14.20
   0  -6  15   12.06   13.31
   6   0  15  -11.93   14.64
   1  -7 -14   29.78   18.53
   7  -6 -14   42.41   23.49
  -7   6 -14   66.16   28.01
   1  -7 -13   39.12   17.75
   7  -6 -13    6.65   13.88
  -7   6 -13   36.42   23.07
   7  -6 -12   -0.95   15.48
  -7   6 -12   24.48   20.19
   1  -7 -12   40.08   17.61
   7  -6 -11   28.55   18.63
   6   1 -11   39.92   14.56
  -6  -1 -11   47.27   17.18
   1  -7 -11   48.38   17.47
  -7   6 -11   34.83   19.93
   7  -6 -10   51.94   21.96
   6   1 -10   33.87   13.17
   1  -7 -10   40.28   14.76
   1  -7 -10   22.38   12.56
  -7   6 -10   42.30   21.17
  -6  -1 -10   27.59   14.98
  -7   6 -10   24.69   11.87
  -6  -1  -9   68.98   19.88
   7  -6  -9   60.42   21.07
  -7   6  -9   73.42   19.66
   1  -7  -9   66.79   17.22
   6   1  -9   96.90   19.87
   1  -7  -8  138.19   24.87
  -6  -1  -8  172.46   13.25
  -7   6  -8  183.67   29.22
   6   1  -8  174.13   25.01
  -6  -1  -8  170.56   30.70
   7  -6  -8  157.01   30.81
   1  -7  -7  343.58   35.40
   7  -6  -7  356.58   42.67
  -6  -1  -7  324.97   40.30
  -6  -1  -7  318.49   15.15
   6   1  -7  292.36   30.98
  -7   6  -7  361.44   39.89
  -6  -1  -7  326.63   11.93
  -6  -1  -6   93.87   22.51
   1  -7  -6   64.13   16.86
   6   1  -6   91.50   17.75
   7  -6  -6   63.94   19.54
  -7   6  -6   53.40   16.36
  -6  -1  -5  952.11   66.79
   6   1  -5 1056.69   53.27
  -7   6  -5  906.92   61.67
   1  -7  -5  926.26   51.31
   7  -6  -5  907.56   60.40
  -7   6  -4  285.75   34.18
   1  -7  -4  280.54   27.52
   7  -6  -4  352.04   36.65
  -6  -1  -4  296.22   37.08
  -6  -1  -3  106.42    6.94
   1  -7  -3  120.48   17.72
  -6  -1  -3  123.85   24.09
  -7   6  -3  139.09   24.26
   7  -6  -3  120.82   21.55
   1  -7  -2   86.31   15.33
  -6  -1  -2   83.50   20.25
  -7   6  -2   53.54   15.88
   7  -6  -2   49.57   13.03
  -6  -1  -2   54.96    6.97
   1  -7  -1  302.47   26.31
  -6  -1  -1  306.78   36.15
  -7   6  -1  281.10   33.05
  -6  -1  -1  299.80   19.12
  -1   7  -1  287.09   17.41
   7  -6  -1  314.96   29.15
   6   1  -1  296.29   23.18
   7  -6   0   -3.58    7.00
  -6  -1   0   -0.74    9.21
   1  -7   0   -3.31    7.28
  -1   7   0   -0.06    2.99
   6   1   0    3.87    4.20
  -6  -1   0   -2.12    4.23
  -7   6   0   -0.34    7.44
  -1   7   0    0.61    6.36
   1  -7   1  365.61   30.36
  -7   6   1  367.35   36.56
   7  -6   1  369.34   28.21
   6   1   1  365.45   19.30
  -6  -1   1  353.23   27.05
  -1   7   1  359.13   28.01
  -1   7   1  336.54   29.35
  -6  -1   1  481.13   45.77
   6   1   2   77.65    6.18
  -6  -1   2  104.22   21.54
   7  -6   2   72.85   12.64
  -1   7   2   75.25   13.62
  -1   7   2   71.94   14.25
  -6  -1   2   68.31   13.89
   1  -7   2   66.35   13.54
  -7   6   2   63.71   15.59
   7  -6   3  141.84   16.89
  -1   7   3   74.40   16.36
  -6  -1   3  115.37   20.32
   7  -6   3  112.62   14.78
   1  -7   3  125.84   19.01
  -6  -1   3  109.92   17.98
  -7   6   3  147.63   23.23
  -7   6   4  283.00   31.20
  -7   6   4  225.35   10.96
   7  -6   4  212.58   20.65
   1  -7   4  246.19   28.00
  -1   7   4  275.22   33.11
  -6  -1   4  260.78   29.10
  -7   6   4  211.46   12.59
  -6  -1   4  213.81   27.53
  -1   7   5  958.03   65.67
   7  -6   5  954.93   45.11
   1  -7   5 1024.96   58.69
  -6  -1   5  951.13   57.52
  -6  -1   5  836.81   53.39
  -6  -1   6   53.61   17.63
  -6  -1   6   67.34   14.91
   7  -6   6   64.83   12.80
   1  -7   6   53.46   15.01
  -1   7   6   59.26   18.07
  -6  -1   7  315.06   30.89
  -1   7   7  341.03   44.65
   1  -7   7  297.50   35.48
   7  -6   7  372.29   31.73
  -6  -1   7  304.04   36.65
   7  -6   8  198.39   25.17
  -6  -1   8  164.30   21.60
  -1   7   8  178.77   34.17
   1  -7   8  232.55   33.55
  -6  -1   8  147.81   27.33
   1  -7   9   75.13   21.83
   7  -6   9   73.43   19.88
   7  -6   9   42.94   12.00
  -1   7   9   28.22   17.31
   6   1   9   66.42   24.01
  -6  -1   9   54.92   18.83
   7  -6  10   17.60    9.09
   1  -7  10   51.50   18.78
   6   1  10   50.39   21.50
  -6  -1  10   24.86   13.64
  -1   7  10   50.18   21.98
   7  -6  10   62.24   19.83
   7  -6  11   48.37   17.90
   7  -6  11   37.54   12.49
  -1   7  11   85.82   27.44
  -6  -1  11   28.43   14.96
   6   1  11   40.98   19.93
   1  -7  11   57.09   20.85
   6   1  12   -3.74   13.25
   1  -7  12   -7.03   11.11
   7  -6  12   15.37    8.34
  -6  -1  12   12.10   10.65
  -1   7  12  -10.85   15.43
  -1   7  13   26.45   21.07
   1  -7  13   49.92   21.36
   6   1  13   17.23   19.03
   7  -6  13   57.29   22.80
  -6  -1  13   40.27   19.57
   1  -7  14   19.32   15.79
   6   1  14    0.09   11.19
  -6  -1  14   31.60   17.96
   1  -7  15   13.81   15.51
   2  -7 -15   30.01   21.20
  -7   5 -15  -18.53   17.97
   7  -5 -14   73.08   28.81
   2  -7 -14   60.03   23.41
  -7   5 -14    6.41   16.03
   2  -7 -13    3.13   10.40
   7  -5 -13  -13.37   19.02
  -7   5 -13   35.27   19.96
   5   2 -12   -4.82    8.98
   2  -7 -12   19.63   14.20
   7  -5 -12  -19.14   14.65
  -7   5 -12  -12.44   16.39
   7  -5 -11  219.89   41.21
  -5  -2 -11  172.57   30.57
   5   2 -11  148.67   27.81
   2  -7 -11  165.86   31.97
  -7   5 -11  196.58   30.26
   7  -5 -10  -14.82   19.50
   5   2 -10   -0.04    8.77
  -5  -2 -10   -0.92    7.58
   2  -7 -10    8.70   11.47
  -7   5 -10    8.35    8.79
  -5  -2  -9   85.24   21.88
   7  -5  -9   91.45   26.04
   5   2  -9  101.01   21.70
  -5  -2  -9  115.62   15.11
   2  -7  -9  118.31   24.22
  -7   5  -9   71.51   18.73
   2  -7  -8   85.66   19.40
  -5  -2  -8   78.83   11.44
  -5  -2  -8   78.46   19.68
  -7   5  -8   73.26   17.76
   5   2  -8   69.23   17.34
   7  -5  -8   78.98   24.81
  -5  -2  -7  363.15   20.12
   2  -7  -7  314.59   35.09
   5   2  -7  342.18   35.00
  -7   5  -7  351.10   38.68
   7  -5  -7  313.18   40.94
  -5  -2  -7  316.40   20.96
   2  -7  -7  325.40   25.66
  -5  -2  -7  308.48   39.14
  -5  -2  -6  515.13   18.77
  -5  -2  -6  476.56   23.06
   5   2  -6  577.56   43.03
  -7   5  -6  536.53   47.70
   7  -5  -6  535.88   49.74
   2  -7  -6  476.22   31.15
  -5  -2  -6  535.08   49.06
   2  -7  -6  565.25   44.27
   7  -5  -5  283.54   34.22
  -5  -2  -5  241.29   32.78
   5   2  -5  296.90   29.84
   2  -7  -5  264.17   29.76
  -5  -2  -5  280.25   15.65
  -7   5  -5  252.08   32.13
  -7   5  -5  259.87   21.05
  -7   5  -4  746.55   54.20
  -5  -2  -4  741.55   22.76
   5   2  -4  764.85   45.37
  -7   5  -4  808.64   37.16
   7  -5  -4  743.75   51.89
   2  -7  -4  820.23   47.85
  -5  -2  -4  737.01   56.10
   5   2  -3  214.33   23.73
  -5  -2  -3  207.33   30.42
  -5  -2  -3  220.80   13.59
   7  -5  -3  209.02   26.30
  -7   5  -3  212.24   19.65
   2  -7  -3  227.90   24.86
  -7   5  -3  175.02   25.82
   2  -7  -2  971.88   47.39
  -7   5  -2 1019.23   60.88
  -5  -2  -2 1009.23   32.48
  -5  -2  -2 1017.79   63.87
  -7   5  -2 1017.62   44.74
   7  -5  -2 1028.55   53.57
   5   2  -1  746.47   35.85
   7  -5  -1  702.94   41.95
   2  -7  -1  741.65   40.39
  -5  -2  -1  723.71   30.92
  -7   5  -1  724.16   40.08
  -7   5  -1  705.03   50.84
  -5  -2  -1  809.27   56.43
   2  -7   0   26.32   10.65
  -5  -2   0   51.59   15.42
   7  -5   0   60.70   12.25
   5   2   0   42.98    7.93
  -5  -2   0   31.88    8.17
  -7   5   0   41.45   13.63
  -5  -2   1  654.49   36.07
  -2   7   1  633.38   38.22
   7  -5   1  688.90   35.68
  -7   5   1  712.80   49.19
  -2   7   1  636.30   35.65
   2  -7   1  626.76   38.22
  -5  -2   1  630.37   48.86
   5   2   2 1041.66   27.81
   7  -5   2  985.61   40.23
  -2   7   2 1017.63   50.43
   2  -7   2 1071.53   50.70
  -7   5   2 1014.44   57.93
  -5  -2   2 1002.20   48.52
  -2   7   2 1001.98   45.14
  -5  -2   2  963.45   59.18
  -5  -2   3  189.96   25.84
  -2   7   3  185.60   18.73
   7  -5   3  189.48   17.90
   5   2   3  182.95   11.06
   2  -7   3  195.47   23.14
   7  -5   3  209.49   17.68
  -5  -2   3  159.94   21.19
  -7   5   3  172.38   23.90
  -2   7   3  184.46   24.02
  -7   5   4  660.88   23.67
  -2   7   4  745.41   52.03
  -7   5   4  746.26   48.36
  -5  -2   4  697.03   48.74
   2  -7   4  724.33   45.64
  -5  -2   4  772.96   48.87
   7  -5   4  796.51   34.92
   7  -5   5  231.54   20.29
  -5  -2   5  224.17   28.08
   2  -7   5  241.87   28.09
  -7   5   5  242.50   27.84
  -5  -2   5  229.91   28.03
  -2   7   5  225.10   30.89
  -5  -2   6  469.62   38.33
  -7   5   6  517.11   40.16
   2  -7   6  490.96   41.97
  -2   7   6  464.97   47.06
  -5  -2   6  460.27   42.91
   7  -5   6  530.27   32.37
   7  -5   7  285.10   25.59
   2  -7   7  338.65   37.68
  -5  -2   7  306.29   29.59
  -5  -2   7  303.14   36.33
  -2   7   7  304.32   40.84
  -5  -2   8   81.43   15.10
  -2   7   8   55.79   19.27
   2  -7   8   72.88   18.75
   7  -5   8   65.97   13.55
  -5  -2   8   81.86   20.79
   5   2   9   72.36   23.99
   2  -7   9   99.68   22.08
   7  -5   9   77.78   21.28
   7  -5   9   70.40   14.58
  -2   7   9   86.76   26.48
  -5  -2   9   79.48   20.77
   7  -5  10   12.59   13.16
   5   2  10    6.30   13.21
  -2   7  10   -0.11   10.86
   2  -7  10   10.02   14.19
   7  -5  10   26.68    9.64
  -5  -2  10   25.53   17.74
   5   2  11  120.79   32.02
   7  -5  11  109.49   27.97
   2  -7  11  171.45   32.05
  -5  -2  11  187.39   34.36
   7  -5  12  -15.56   14.54
   5   2  12    5.88   14.66
   2  -7  12    7.99   13.63
  -5  -2  12   -9.11   11.03
   7  -5  13   -1.11   11.96
   5   2  13   27.99   21.48
   2  -7  13   15.54   11.79
  -5  -2  13   43.05   21.84
   7  -5  14   31.10   19.60
  -5  -2  14   58.03   24.02
   5   2  14   37.32   25.44
   2  -7  14   38.72   19.97
   2  -7  15  -12.01   14.14
   3  -7 -15   11.49   14.39
  -7   4 -15   31.93   23.47
   7  -4 -14   16.88   19.15
   3  -7 -14   29.44   19.96
  -7   4 -14   29.79   21.89
   3  -7 -13  101.23   28.31
   7  -4 -13   40.28   26.07
   3  -7 -12   28.06   16.70
   7  -4 -12   -5.28   12.06
   7  -4 -11  160.92   37.32
  -3   7 -11  175.62   39.14
  -7   4 -11  145.08   25.74
   3  -7 -11  115.56   27.60
  -4  -3 -11  145.39   27.09
  -4  -3 -10   77.34   20.66
   7  -4 -10   78.83   25.46
  -3   7 -10   96.27   29.31
   3  -7 -10   81.95   22.92
  -4  -3 -10   85.48   16.22
  -7   4 -10   91.71   20.80
  -4  -3  -9  120.62   16.99
   7  -4  -9  163.37   34.85
  -4  -3  -9  134.16   26.07
   3  -7  -9  141.16   27.81
  -3   7  -9  113.79   28.71
  -7   4  -9  143.15   25.83
   3  -7  -8  308.01   37.32
  -7   4  -8  323.80   37.67
   7  -4  -8  277.75   41.33
  -3   7  -8  244.95   39.01
  -4  -3  -8  307.69   38.84
  -4  -3  -8  299.74   24.48
   7  -4  -7  105.26   24.00
   4   3  -7  129.55   22.99
  -4  -3  -7   76.31   19.36
  -3   7  -7   96.61   24.62
  -4  -3  -7  121.00   14.64
   3  -7  -7  115.79   23.27
   7  -4  -7   91.30   16.80
  -7   4  -7  125.66   14.55
  -7   4  -7   67.97   18.82
  -4  -3  -7   89.72   13.00
  -4  -3  -6  451.91   24.27
  -7   4  -6  398.61   23.66
  -4  -3  -6  381.87   41.26
  -7   4  -6  470.21   44.07
   4   3  -6  431.48   39.65
  -3   7  -6  431.65   47.31
  -4  -3  -6  378.23   23.68
   3  -7  -6  456.22   41.26
   7  -4  -6  409.80   44.12
   7  -4  -5   63.26   17.80
  -7   4  -5   73.35   19.23
   3  -7  -5  104.59   20.09
  -4  -3  -5   50.62   16.33
  -4  -3  -5   70.85    8.43
  -7   4  -5   66.79    9.74
  -3   7  -5   74.44   20.07
   4   3  -5   51.09   14.34
   3  -7  -4  610.21   42.68
  -7   4  -4  622.47   29.38
  -7   4  -4  536.82   45.33
  -4  -3  -4  588.65   22.00
   7  -4  -4  575.25   46.30
  -4  -3  -4  616.69   50.79
   4   3  -4  632.09   43.35
   3  -7  -3  383.76   33.13
  -7   4  -3  364.81   37.02
   7  -4  -3  351.94   33.64
  -4  -3  -3  316.09   18.85
  -7   4  -3  368.11   23.56
   4   3  -3  364.68   31.71
  -4  -3  -3  398.00   40.47
   7  -4  -2 1515.52   64.02
   3  -7  -2 1529.78   60.45
   4   3  -2 1595.62   63.87
  -4  -3  -2 1555.01   43.52
  -7   4  -2 1645.11   77.26
   3  -7  -2 1504.47   63.32
  -4  -3  -2 1619.65   79.03
  -7   4  -2 1600.10   52.09
   3  -7  -1  874.56   44.55
   3  -7  -1  824.67   45.79
   7  -4  -1  851.60   44.65
   3  -7  -1  869.26   42.94
  -4  -3  -1  866.50   35.29
  -7   4  -1  885.17   55.83
  -4  -3  -1  910.92   58.70
  -7   4  -1  840.81   40.57
   4   3   0  214.41   17.86
  -4  -3   0  238.35   20.33
   3  -7   0  258.36   23.97
  -7   4   0  243.16   29.92
   3  -7   0  246.97   19.61
  -4  -3   0  206.61   28.38
   7  -4   0  230.96   21.58
  -7   4   0  225.67   22.75
   3  -7   1  947.53   46.04
   4   3   1  932.83   32.11
  -4  -3   1  915.72   42.93
  -7   4   1  901.94   55.09
   3  -7   1  919.52   29.23
   7  -4   1  943.47   38.94
  -4  -3   1  983.18   59.83
  -3   7   2 1512.24   52.95
   4   3   2 1550.16   41.15
  -7   4   2 1481.88   69.12
  -4  -3   2 1482.20   72.80
   3  -7   2 1644.32   61.49
  -4  -3   2 1482.35   58.67
   7  -4   2 1645.99   46.61
  -3   7   3  354.69   23.98
   7  -4   3  338.91   20.90
   3  -7   3  338.41   29.02
  -7   4   3  372.26   34.31
   7  -4   3  347.01   19.16
  -4  -3   3  365.73   36.04
  -4  -3   3  359.75   31.29
   4   3   3  360.59   20.47
  -7   4   4  572.38   41.80
   3  -7   4  483.84   36.31
   7  -4   4  580.42   25.29
  -4  -3   4  570.72   41.79
  -7   4   4  521.40   25.92
   4   3   4  565.71   26.78
  -4  -3   4  626.06   45.74
  -4  -3   5  105.52   19.52
   3  -7   5  122.64   19.88
  -4  -3   5   75.81   17.46
   7  -4   5   86.11   10.76
   4   3   5   84.44   11.27
  -7   4   5   78.80   16.35
  -4  -3   6  370.59   34.45
   3  -7   6  331.88   33.80
  -7   4   6  365.68   32.61
   7  -4   6  422.86   25.48
  -4  -3   6  393.98   39.68
  -7   4   6  354.49   20.72
  -4  -3   7  139.00   20.84
   3  -7   7  157.40   25.40
   4   3   7   81.05   22.35
   7  -4   7  109.57   14.20
  -4  -3   7  132.02   24.54
  -7   4   7  135.22   19.35
   3  -7   8  284.98   35.55
   7  -4   8  321.35   26.12
  -4  -3   8  283.74   37.53
   4   3   8  301.02   43.67
  -4  -3   8  292.31   27.86
  -4  -3   9  150.68   18.37
   7  -4   9  166.86   20.33
   3  -7   9  132.32   25.09
  -4  -3   9  137.73   27.91
   4   3   9   99.12   28.81
   7  -4  10   39.48   16.93
   4   3  10   78.94   26.15
   3  -7  10   90.62   22.08
  -4  -3  10   63.11   20.41
   7  -4  10   76.79   14.98
   4   3  11  196.70   41.64
   3  -7  11  158.27   31.27
   7  -4  11  155.83   33.75
  -4  -3  11  197.33   36.07
   3  -7  12   27.28   16.42
   7  -4  12   44.19   21.28
   4   3  12   26.75   20.96
  -4  -3  12   26.81   16.11
   3  -7  13   31.46   16.02
   7  -4  13   52.91   23.82
  -4  -3  13   39.64   19.39
   7  -4  14   19.53   17.31
   3  -7  14   63.52   23.63
  -4  -3  14   34.96   19.27
   4   3  14    1.91   16.56
   7  -4  15   14.18   16.05
   3  -7  15  -15.24   12.81
   7  -4  16    1.54   12.70
   3  -7  16    0.93    7.33
   4  -7 -15   17.83   16.54
  -7   3 -15   18.62   19.07
   4  -7 -14   41.52   19.76
  -4   7 -14   11.67   16.60
   7  -3 -14   61.26   26.19
   7  -3 -13   -3.94   15.35
  -4   7 -13   11.51   15.68
   4  -7 -13   29.80   17.34
   7  -3 -12   40.63   22.51
  -4   7 -12   85.30   28.90
   4  -7 -12  130.38   31.92
   7  -3 -11   84.81   27.40
  -3  -4 -11   76.98   19.81
  -4   7 -11  117.82   33.53
  -3  -4 -11   88.31   18.36
   4  -7 -11   99.96   26.74
  -7   3 -11   57.53   17.82
  -3  -4 -10   83.35   20.71
  -4   7 -10   61.00   26.22
   4  -7 -10   89.72   24.44
  -7   3 -10   93.88   21.86
   7  -3 -10   83.59   26.17
  -3  -4 -10   96.30   17.96
   7  -3  -9   -9.43   11.70
  -3  -4  -9    5.16    7.91
   4  -7  -9   12.94   11.79
  -3  -4  -9    7.89    6.68
  -7   3  -9  -21.91   12.18
  -4   7  -9    6.29   13.07
   7  -3  -8  290.38   42.41
   4  -7  -8  204.49   32.50
  -3  -4  -8  203.78   22.60
  -7   3  -8  257.19   34.26
  -4   7  -8  220.43   38.84
  -3  -4  -8  203.81   30.68
   7  -3  -7  224.38   35.79
  -3  -4  -7  290.14   24.60
  -4   7  -7  238.17   38.65
   4  -7  -7  260.05   34.22
  -7   3  -7  233.48   31.81
  -7   3  -7  261.14   17.84
  -3  -4  -7  311.74   38.14
   7  -3  -7  267.35   27.79
   7  -3  -6   79.83   20.23
  -7   3  -6   62.18    8.23
  -4   7  -6   71.88   20.44
  -3  -4  -6   38.74   14.63
  -3  -4  -6   74.24   12.37
   4  -7  -6   90.46   20.52
  -7   3  -6   69.74   18.10
  -3  -4  -5  782.02   33.31
  -4   7  -5  688.38   57.64
  -7   3  -5  658.00   52.05
   7  -3  -5  719.30   55.24
  -7   3  -5  724.98   26.68
   3   4  -5  718.49   50.69
   4  -7  -5  658.51   27.46
  -3  -4  -5  747.88   56.68
   4  -7  -5  681.57   49.12
   4  -7  -4  293.32   31.46
   3   4  -4  267.33   30.05
  -3  -4  -4  295.81   19.50
  -7   3  -4  361.75   38.29
   4  -7  -4  263.78   19.49
  -4   7  -4  318.55   37.43
  -3  -4  -4  298.86   35.35
   7  -3  -4  264.82   31.87
  -7   3  -4  291.09   17.69
  -3  -4  -3  265.65   33.38
   4  -7  -3  265.49   29.16
  -3  -4  -3  192.16   15.19
   3   4  -3  217.88   25.88
  -4   7  -3  249.33   31.89
  -7   3  -3  221.24   30.69
   4  -7  -3  220.24   19.73
   7  -3  -3  211.26   26.47
  -7   3  -3  222.28   16.12
  -3  -4  -2  219.15   29.41
   4  -7  -2  259.00   26.42
   3   4  -2  265.05   27.14
  -7   3  -2  260.42   35.86
  -4   7  -2  233.07   29.10
  -3  -4  -2  265.62   19.69
   4  -7  -2  247.68   26.13
   4  -7  -2  237.29   22.40
   7  -3  -2  247.18   26.46
  -7   3  -2  275.11   19.83
  -7   3  -1 1036.04   61.08
   3   4  -1 1062.91   52.04
  -3  -4  -1 1011.07   39.65
   4  -7  -1 1050.78   48.71
   4  -7  -1  986.68   49.46
   4  -7  -1  941.02   46.84
   7  -3  -1  982.13   43.23
  -7   3  -1  982.61   40.98
  -3  -4  -1 1053.19   63.14
   7  -3  -1 1027.37   47.50
   4  -7   0  292.63   22.79
  -3  -4   0  286.34   22.84
   4  -7   0  311.19   26.61
  -7   3   0  280.46   24.03
   4  -7   0  304.02   29.44
   3   4   0  295.97   20.88
   7  -3   0  263.85   20.21
  -7   3   0  220.80   27.90
  -3  -4   0  234.96   29.94
   7  -3   0  266.91   22.07
  -7   3   1 1154.18   62.25
   3   4   1 1074.71   38.48
   4  -7   1 1117.34   49.41
   7  -3   1 1099.02   36.33
  -3  -4   1 1112.23   48.09
   7  -3   1 1084.83   39.00
   3   4   2  332.88   21.95
  -7   3   2  289.84   31.08
   4  -7   2  320.89   27.47
   7  -3   2  302.12   17.84
   4  -7   2  317.34   26.69
  -3  -4   2  312.85   27.69
  -3  -4   3  219.27   25.00
  -7   3   3  234.44   19.70
  -7   3   3  252.76   28.26
  -4   7   3  225.15   17.53
   4  -7   3  197.68   21.98
   7  -3   3  207.78   11.65
   3   4   3  215.40   19.03
  -7   3   4  287.80   22.47
  -3  -4   4  275.93   29.32
   7  -3   4  277.31   13.02
   4  -7   4  268.10   26.32
  -7   3   4  241.65   27.97
   4  -7   4  279.45   16.71
  -3  -4   4  288.83   32.01
   3   4   4  275.00   22.60
  -7   3   5  718.48   46.14
   3   4   5  750.49   39.66
  -3  -4   5  776.18   51.75
   7  -3   5  737.71   23.55
   4  -7   5  825.18   33.93
   4  -7   5  730.96   45.82
  -3  -4   5  767.32   50.57
  -3  -4   6   47.85   13.02
   4  -7   6   55.52   10.98
   4  -7   6   61.30   14.60
   3   4   6   49.49   11.15
   3   4   6   43.08   16.00
  -3  -4   6   53.90   16.69
  -7   3   6   38.68   11.37
   7  -3   6   46.33    6.95
  -3  -4   7  230.76   27.22
  -7   3   7  253.94   25.83
  -3  -4   7  214.78   30.48
   4  -7   7  202.17   27.78
   7  -3   7  234.64   17.09
   3   4   7  186.21   33.61
  -7   3   7  226.65   21.80
   4  -7   7  231.63   24.01
  -7   3   8  277.23   25.63
   4  -7   8  274.95   28.44
   7  -3   8  246.52   19.48
  -3  -4   8  259.69   35.82
   3   4   8  267.66   42.31
   4  -7   8  223.71   30.59
  -3  -4   8  265.97   28.09
  -3  -4   9   28.41   13.86
   3   4   9   18.36   15.60
   4  -7   9    7.51    8.36
  -3  -4   9   20.80    8.31
   4  -7   9   19.99    9.16
   7  -3   9   18.89    6.18
  -3  -4  10   57.08   20.30
   4  -7  10   81.93   18.73
   7  -3  10   91.29   27.12
   4  -7  10   92.17   23.26
   3   4  10   46.78   20.92
   7  -3  11   93.45   28.05
   4  -7  11   40.13   17.46
   3   4  11   63.86   25.85
  -3  -4  11  101.39   25.98
   7  -3  12   66.46   24.34
  -3  -4  12   49.57   21.63
   3   4  12   66.41   26.10
   4  -7  12   63.03   20.37
   7  -3  13   13.26   12.66
   3   4  13   20.90   20.05
   4  -7  13   17.02   11.91
  -3  -4  13   11.07   13.61
  -3  -4  14   27.54   16.93
   7  -3  14   19.68   14.65
   3   4  14   72.54   29.89
   4  -7  14   50.06   20.41
   7  -3  15   -9.66   15.17
   4  -7  15   -1.89    7.42
   5  -7 -15   10.16   16.00
  -5   7 -15   -2.63   12.91
  -5   7 -14   19.26   17.99
   7  -2 -14   28.20   22.01
   5  -7 -14    7.82   15.59
  -5   7 -13    3.53   11.60
   7  -2 -13   -5.70   13.55
   5  -7 -13   13.77   15.84
   7  -2 -12   17.29   14.84
   5  -7 -12    3.66   17.06
  -5   7 -12   11.23   15.70
   5  -7 -11   43.85   19.91
  -2  -5 -11   72.86   17.77
  -2  -5 -11   48.92   14.86
  -7   2 -11   58.32   18.21
  -5   7 -11   98.06   31.79
   7  -2 -11   44.54   21.89
  -2  -5 -10  155.74   27.68
  -5   7 -10  141.74   34.39
   7  -2 -10  195.12   39.86
  -2  -5 -10  142.41   22.74
  -7   2 -10  158.68   28.49
   5  -7 -10  174.21   33.79
  -2  -5  -9   33.27   10.80
   7  -2  -9   33.98    9.06
   5  -7  -9   44.64   17.60
  -2  -5  -9   44.88   16.56
  -7   2  -9   53.45   17.96
  -5   7  -9   44.53   20.15
   7  -2  -9   33.09   18.04
  -2  -5  -8  104.06   23.32
   7  -2  -8  151.99   31.24
   5  -7  -8  130.12   27.20
  -7   2  -8  147.56   27.10
  -2  -5  -8  154.25   21.62
  -5   7  -8   72.26   23.22
  -7   2  -7  478.22   47.07
  -7   2  -7  434.94   18.94
  -2  -5  -7  432.31   32.89
   5  -7  -7  499.60   47.69
  -5   7  -7  494.92   55.75
   7  -2  -7  429.92   48.97
  -2  -5  -7  485.68   48.57
   7  -2  -7  413.27   34.75
  -2  -5  -6  162.94   19.34
  -2  -5  -6  183.20   29.56
   5  -7  -6  201.85   29.43
  -7   2  -6  173.74   28.39
  -7   2  -6  157.26   10.22
  -5   7  -6  150.68   29.63
   7  -2  -6  156.06   28.20
  -2  -5  -5 1295.41   48.81
  -7   2  -5 1341.92   75.37
  -2  -5  -5 1405.42   78.23
   7  -2  -5 1373.65   77.19
  -5   7  -5 1195.94   77.33
  -7   2  -5 1237.84   24.96
   5  -7  -5 1213.22   67.09
  -7   2  -4  309.21   36.19
   5  -7  -4  235.29   29.76
  -5   7  -4  338.19   39.81
  -2  -5  -4  319.99   23.14
   7  -2  -4  287.17   33.29
   7  -2  -3  313.25   32.24
  -2  -5  -3  292.76   21.31
   2   5  -3  310.83   32.00
  -5   7  -3  296.78   34.87
  -7   2  -3  314.78   36.32
   5  -7  -3  318.70   31.98
   5  -7  -2  547.05   39.09
  -7   2  -2  646.13   51.06
  -2  -5  -2  609.72   30.75
  -5   7  -2  614.81   47.14
   2   5  -2  601.46   42.42
   7  -2  -2  664.18   43.00
  -7   2  -1  868.28   57.94
   7  -2  -1  720.99   36.59
   7  -2  -1  737.58   40.81
  -2  -5  -1  804.60   37.95
   5  -7  -1  804.04   44.96
  -5   7  -1  736.78   48.30
   2   5  -1  734.43   44.83
  -2  -5   0  627.19   35.08
   2   5   0  612.57   39.52
   5  -7   0  625.16   37.87
   7  -2   0  579.31   29.32
  -5   7   0  639.17   41.61
  -7   2   0  591.76   46.54
   7  -2   0  574.74   31.67
  -7   2   1  716.40   50.14
   5  -7   1  732.70   39.96
   2   5   1  750.68   35.53
  -2  -5   1  769.28   40.98
   7  -2   1  683.85   27.02
   7  -2   1  744.47   30.19
   2   5   2  572.26   32.41
  -7   2   2  485.23   40.77
   5  -7   2  572.79   36.20
  -2  -5   2  504.01   35.05
   7  -2   2  527.76   20.13
   7  -2   2  502.44   18.17
  -7   2   3  346.95   33.86
  -7   2   3  327.74   25.91
   5  -7   3  343.36   27.96
  -2  -5   3  338.98   30.73
   2   5   3  341.83   27.02
  -7   2   4  240.89   23.31
  -7   2   4  248.55   26.90
  -2  -5   4  288.02   30.57
  -7   2   4  205.01   25.77
   2   5   4  235.53   23.62
   5  -7   4  243.12   24.59
  -7   2   5 1259.53   62.49
   5  -7   5 1372.61   60.72
  -2  -5   5 1415.33   69.29
   2   5   5 1296.93   77.65
  -7   2   5 1361.66   65.98
   5  -7   6  131.60   17.83
   5  -7   6  226.09   26.86
   2   5   6  168.10   30.50
  -7   2   6  154.06   21.72
  -2  -5   6  172.69   26.76
  -7   2   6  124.71   22.39
   5  -7   7  449.91   39.65
  -7   2   7  469.54   35.31
  -2  -5   7  482.73   45.73
   5  -7   7  467.04   36.89
   2   5   7  467.47   52.83
  -7   2   7  394.40   32.80
  -7   2   7  523.17   46.52
   2   5   8  181.72   34.89
  -2  -5   8  132.74   20.98
   5  -7   8  190.00   27.84
  -2  -5   8  101.05   22.38
   5  -7   8  153.36   23.24
  -7   2   8  121.80   17.07
  -7   2   8  111.55   23.60
   5  -7   9   58.53   15.79
  -2  -5   9   58.19   13.41
   5  -7   9   53.66   16.48
  -2  -5   9   50.86   18.27
   2   5   9   21.59   13.91
  -7   2   9   83.41   22.59
   5  -7  10  184.90   29.73
   7  -2  10  195.77   37.36
   2   5  10  175.18   38.06
   5  -7  10  152.74   28.32
  -2  -5  10  201.96   34.36
   7  -2  11   83.63   26.43
   2   5  11   26.55   20.65
   5  -7  11   37.59   16.27
  -2  -5  11   44.75   18.03
   5  -7  11   48.11   17.01
   2   5  12  -12.63   14.67
   7  -2  12   12.75   13.33
   5  -7  12    9.60   11.87
  -2  -5  12   10.36   11.67
   5  -7  13    4.66   12.70
   2   5  13   -0.24   13.47
   7  -2  13  -10.53   12.04
  -2  -5  13   13.26   12.99
   2   5  14   73.28   29.97
   7  -2  14   53.13   26.67
   5  -7  14   86.80   23.46
  -2  -5  14   47.26   20.73
   7  -2  15    6.42   14.09
   6  -7 -14   42.25   26.41
  -6   7 -14  -11.08   14.45
   7  -1 -14   12.25   18.74
   7  -1 -13   52.58   22.29
   6  -7 -13   37.89   19.98
  -6   7 -13   49.54   25.55
   6  -7 -12   26.87   16.45
  -1  -6 -12   42.80   16.40
  -6   7 -12   50.02   25.86
   7  -1 -12   41.46   20.07
  -1  -6 -11  227.95   31.71
   6  -7 -11  164.91   34.95
  -7   1 -11  197.59   32.21
  -6   7 -11  244.75   46.82
   7  -1 -11  206.49   43.28
   7  -1 -10   73.21   14.59
  -1  -6 -10   77.11   19.96
  -1  -6 -10   70.26   17.74
  -7   1 -10   55.32   18.45
   6  -7 -10   69.70   23.97
  -6   7 -10   88.02   28.10
  -1  -6  -9   40.02   15.10
   6  -7  -9   46.60   21.31
  -1  -6  -9   30.58   14.39
   7  -1  -9   50.88   11.31
  -7   1  -9   53.17   17.70
  -6   7  -9   22.88   15.04
   6  -7  -8  130.13   26.92
  -1  -6  -8  113.06   19.92
  -7   1  -8   90.54   23.40
   7  -1  -8  115.19   17.24
  -1  -6  -8   96.30   23.06
  -6   7  -8   92.06   26.88
  -7   1  -8   97.32   10.49
  -1  -6  -7  653.23   43.68
   7  -1  -7  577.43   37.08
  -6   7  -7  631.50   64.21
   1   6  -7  605.96   40.69
  -7   1  -7  588.38   53.94
   6  -7  -7  538.40   50.70
  -1  -6  -7  618.56   55.28
   6  -7  -6   47.41   18.98
  -1  -6  -6   47.33   12.87
  -7   1  -6   70.21   19.99
   1   6  -6   43.29   10.04
  -6   7  -6   65.56   21.67
  -1  -6  -5  316.02   27.47
   1   6  -5  321.14   23.74
  -6   7  -5  415.13   47.09
  -7   1  -5  312.59   37.91
   6  -7  -5  353.02   37.84
  -7   1  -4  205.21   30.58
  -1  -6  -4  240.12   22.56
  -6   7  -4  236.59   34.57
   6  -7  -4  218.07   29.33
  -1  -6  -3   32.96    8.80
  -7   1  -3   12.92   11.06
   6  -7  -3    5.99   10.16
  -6   7  -3   24.91   12.02
   1   6  -2  465.03   39.11
   7  -1  -2  459.59   36.26
  -1  -6  -2  397.38   27.29
   6  -7  -2  459.89   37.27
  -6   7  -2  388.68   38.05
  -7   1  -2  447.73   43.62
  -7   1  -1 1442.30   75.77
   1   6  -1 1479.76   66.60
  -1  -6  -1 1481.06   55.25
   7  -1  -1 1390.09   50.99
  -6   7  -1 1336.20   65.82
   6  -7  -1 1431.89   61.12
   7  -1  -1 1439.58   58.44
   7  -1   0 1939.75   59.16
   6  -7   0 1941.40   67.71
   1   6   0 1833.28   70.92
  -7   1   0 1834.85   84.31
  -1  -6   0 1883.78   63.52
   7  -1   0 1836.65   51.50
  -6   7   0 1838.36   71.77
   6  -7   1 1526.72   58.57
   1   6   1 1592.01   64.07
  -1  -6   1 1567.74   60.37
   7  -1   1 1535.60   38.72
  -6   7   1 1454.01   58.55
   7  -1   1 1517.14   42.15
  -7   1   1 1517.82   51.43
  -7   1   1 1464.02   74.14
  -6   7   2  498.36   30.85
  -7   1   2  553.25   45.01
  -7   1   2  508.22   32.96
   7  -1   2  461.41   14.10
  -1  -6   2  504.00   36.18
   7  -1   2  494.65   16.63
   6  -7   2  503.59   33.82
   6  -7   3   14.30    7.85
  -7   1   3    0.71    7.02
   1   6   3   19.17    9.69
  -1  -6   3   14.35    9.36
  -7   1   3   21.99    9.25
  -1  -6   4  222.83   27.18
  -6   7   4  197.79    9.39
   1   6   4  238.46   31.41
  -7   1   4  187.68   25.49
   6  -7   4  220.14   23.04
  -7   1   4  187.91   24.03
  -7   1   5  309.36   32.06
   6  -7   5  346.34   30.30
  -1  -6   5  260.32   30.61
   1   6   5  291.51   37.41
  -7   1   5  313.76   32.89
   1   6   6   34.05   15.31
   6  -7   6   14.01    9.09
  -7   1   6   33.10   10.91
  -1  -6   6   31.50   12.69
  -7   1   6   18.71   10.97
  -7   1   7  479.06   37.58
  -1  -6   7  557.47   49.32
   1   6   7  648.78   62.98
  -7   1   7  576.28   49.05
   6  -7   7  638.38   46.05
   6  -7   7  660.69   47.31
   6  -7   8  152.07   24.02
  -7   1   8  138.44   19.62
  -1  -6   8  144.97   28.41
   1   6   8  141.01   31.74
   6  -7   8  124.10   22.30
  -7   1   8  113.94   25.06
   1   6   9   14.32   14.90
   6  -7   9   29.48   11.38
   6  -7   9   33.41   12.26
  -1  -6   9   57.69   19.95
  -7   1   9   37.44   16.04
   1   6  10   77.93   28.26
   7  -1  10   65.23   23.79
   6  -7  10   71.13   19.13
   6  -7  10   71.24   18.63
  -1  -6  10   59.96   19.12
  -7   1  10   59.66   20.67
   6  -7  11  255.45   38.37
   7  -1  11  188.57   40.28
   1   6  11  173.67   39.82
  -1  -6  11  182.50   34.26
   6  -7  11  183.16   30.98
  -7   1  11  225.73   37.82
   1   6  12   12.10   20.29
   7  -1  12   68.03   27.49
   6  -7  12   20.26   11.79
  -1  -6  12   37.74   19.71
  -7   1  12   28.53   16.78
   1   6  13    1.94   15.86
   6  -7  13   63.96   20.38
   7  -1  13   18.41   17.69
  -1  -6  13   59.78   22.36
  -1  -6  14   45.26   20.22
   7  -1  14   15.63   18.09
   1   6  14   40.82   23.87
   7   0 -14   60.64   28.89
  -7   7 -14   65.01   28.37
   7  -7 -14   16.44   19.24
   0  -7 -13   29.63   13.14
   7  -7 -13   82.49   28.68
  -7   7 -13   32.34   22.69
   7   0 -13   33.34   23.08
   7  -7 -12    8.46   13.67
   0  -7 -12   -4.18   11.07
  -7   7 -12    5.13   16.25
   0  -7 -11  182.95   30.19
   7  -7 -11  197.16   38.79
  -7   0 -11  113.12   26.95
  -7   7 -11   96.26   29.47
   7   0 -10   20.13    9.75
   0  -7 -10   22.53   12.28
   7  -7 -10   57.00   23.28
  -7   0 -10   31.93   16.40
   0  -7 -10   23.16   11.33
  -7   7 -10   -3.35   15.21
   0  -7  -9   70.63   20.19
  -7   0  -9   78.14   21.72
   7   0  -9  114.39   19.43
  -7   7  -9  105.52   30.29
   0  -7  -9  101.92   21.05
   7  -7  -9  105.03   26.30
   7   0  -8   54.27   13.59
   7  -7  -8   59.73   20.68
  -7   0  -8   52.60   20.38
   0  -7  -8   17.56   10.16
  -7   7  -8   16.67   18.53
  -7   7  -8   65.47   18.43
   7  -7  -7   86.78   22.14
  -7   7  -7  135.46   25.57
  -7   0  -7  112.96   26.37
   7   0  -7  145.39   21.70
   0   7  -7   95.81   13.96
  -7   7  -7  141.47   33.22
   0  -7  -7  105.41   20.13
   7  -7  -6   12.94   11.16
   0  -7  -6   19.67   10.97
  -7   7  -6   30.60   17.24
  -7   0  -6   19.19   12.86
   0   7  -6   13.78    5.05
  -7   7  -6    3.34    8.69
   0   7  -5    2.51    2.32
  -7   0  -5   -5.09    8.74
   7  -7  -5   16.67   13.50
   0  -7  -5   -2.94    8.42
  -7   7  -5  -15.06   10.65
   0  -7  -4  286.14   26.35
   0   7  -4  243.98   13.90
   7  -7  -4  273.94   33.46
  -7   0  -4  249.94   35.58
  -7   7  -4  275.87   34.72
  -7   0  -3  258.99   36.11
   0  -7  -3  300.05   26.72
   7  -7  -3  239.01   30.06
  -7   7  -3  255.09   32.98
   7  -7  -2  984.31   55.51
  -7   0  -2  976.20   66.03
   0  -7  -2  986.66   46.83
  -7   7  -2 1074.54   65.97
   0  -7  -1  645.81   38.44
   0   7  -1  674.37   46.57
   7   0  -1  608.57   33.94
  -7   0  -1  634.01   53.15
   7  -7  -1  696.35   44.35
  -7   7  -1  687.09   52.72
  -7   0  -1  638.67   26.33
   0   7   0  219.84   26.46
  -7   0   0  219.08   31.96
   7   0   0  179.96   16.47
  -7   7   0  226.18   26.77
  -7   0   0  202.82   17.83
   7  -7   0  206.95   24.06
   0   7   0  232.04   21.70
   0  -7   0  207.81   22.86
  -7   7   0  236.50   31.06
  -7   0   1  629.27   50.70
   7  -7   1  535.39   36.01
   0  -7   1  591.31   39.09
   7   0   1  574.24   23.96
   0   7   1  534.44   38.28
  -7   7   1  607.56   48.82
  -7   7   1  551.45   37.71
   0   7   1  536.38   36.85
  -7   0   1  550.91   32.65
   7   0   1  600.78   28.18
   0   7   2  901.86   48.39
  -7   0   2  968.10   61.75
   0  -7   2  903.96   49.75
   7  -7   2  975.77   47.00
   0   7   2  985.51   54.81
  -7   7   2  891.93   43.04
  -7   0   2  942.65   47.06
   7   0   2  864.39   21.55
  -7   0   3  270.99   27.81
   7  -7   3  283.67   25.04
   0  -7   3  286.27   29.85
  -7   0   3  283.15   34.32
   0   7   3  298.64   33.34
  -7   7   3  267.17   19.96
   7  -7   3  286.48   26.28
  -7   0   4  351.64   36.57
   0  -7   4  269.17   30.25
  -7   0   4  291.79   30.56
   0   7   4  339.41   37.98
   7  -7   4  295.15   26.20
  -7   0   5   11.20    8.43
   7  -7   5    3.30    6.08
  -7   0   5   19.24   10.64
   0  -7   5    1.96   10.82
   0   7   5    0.27    9.09
  -7   0   6   50.56   14.86
   7  -7   6   12.35    7.84
   0   7   6   -1.75    8.90
   0  -7   6   17.65    9.14
  -7   0   6   46.82   19.99
   7  -7   7  110.77   19.62
   0  -7   7  107.98   23.74
   0   7   7  162.65   33.40
  -7   0   7  114.08   19.74
  -7   0   7  118.58   25.61
  -7   0   8   82.82   16.29
   7  -7   8   61.83   15.31
   0  -7   8   38.97   14.47
   0   7   8   65.88   22.27
  -7   0   8   90.03   23.56
   0   7   9   38.29   19.78
   7  -7   9   84.61   19.07
   7  -7   9   95.04   21.25
  -7   0   9   53.56   18.74
   0   7  10   56.70   24.09
   7  -7  10   42.19   16.79
   0  -7  10    0.74   13.53
   7   0  10   49.70   23.14
   7  -7  10   31.88   13.65
  -7   0  10   80.85   23.12
   0   7  11  178.18   40.38
   7  -7  11  112.40   23.21
   0  -7  11   81.98   23.93
   7   0  11  119.15   33.80
   7  -7  11   85.71   25.50
  -7   0  11  170.55   33.11
   7   0  12    2.01   10.59
   0  -7  12   20.17   15.31
  -7   0  12  -11.68   12.48
   0   7  12    3.38   11.55
   7   0  13   41.10   22.92
   0  -7  13   38.60   18.46
   0   7  13   54.71   26.32
  -7   0  13   89.95   27.19
   0   7  14   42.31   23.84
   0  -7  14   48.97   23.02
   7   0  14    1.55   11.21
  -7   0  14   15.49   14.42
  -8   7 -14   64.63   32.76
   8  -7 -13  -48.32   25.02
   1  -8 -13  -11.97   13.17
  -8   7 -13    1.03   16.92
   1  -8 -12   22.78   15.23
   8  -7 -12    4.45   14.03
  -8   7 -12   -2.01   16.09
   7   1 -11   83.78   18.75
  -7  -1 -11   91.11   24.63
   1  -8 -11   55.39   18.61
  -8   7 -11  102.10   34.16
   8  -7 -11   82.89   28.05
  -8   7 -10    3.91   17.09
  -8   7 -10   33.77   14.43
   1  -8 -10   15.59   11.12
   7   1 -10   17.34   10.49
  -7  -1 -10   45.13   19.82
   1  -8 -10   47.75   16.98
   8  -7 -10   59.69   23.75
  -7  -1  -9  179.17   33.75
   7   1  -9  162.05   25.14
  -8   7  -9  144.53   37.53
  -8   7  -9  122.01   26.23
   1  -8  -9  167.69   27.33
   8  -7  -9  124.81   29.76
   8  -7  -8  260.93   40.21
   7   1  -8  225.61   28.64
   1  -8  -8  250.39   32.64
  -8   7  -8  208.43   32.86
  -7  -1  -8  120.38   28.35
  -8   7  -7  641.92   57.14
   1  -8  -7  770.29   53.09
   7   1  -7  859.13   53.39
  -7  -1  -7  664.06   61.82
   8  -7  -7  698.89   61.21
   1  -8  -6  548.02   43.33
   7   1  -6  586.10   43.38
  -8   7  -6  609.45   54.64
  -7  -1  -6  586.32   56.72
   8  -7  -6  536.76   51.60
   1  -8  -5  296.69   30.93
  -7  -1  -5  253.62   37.04
  -8   7  -5  297.26   37.94
   8  -7  -5  310.94   38.04
   1  -8  -4  142.46   21.01
   8  -7  -4  135.10   24.21
  -7  -1  -4  113.72   25.39
  -8   7  -4  100.10   22.73
   1  -8  -3  252.21   26.54
   8  -7  -3  184.04   27.82
  -7  -1  -3  196.13   32.50
  -7  -1  -3  187.07    9.24
  -8   7  -3  215.99   31.75
   8  -7  -2  201.94   26.52
   1  -8  -2  188.30   22.64
  -7  -1  -2  156.32   28.67
  -7  -1  -2  189.40   13.65
  -8   7  -2  164.08   27.79
   8  -7  -1 1425.42   65.42
  -1   8  -1 1424.88   42.52
  -7  -1  -1 1420.94   44.19
  -8   7  -1 1534.60   81.61
  -7  -1  -1 1480.44   84.57
   1  -8  -1 1507.78   61.84
  -1   8   0   16.72   10.26
   1  -8   0   26.29   11.42
  -7  -1   0   15.02    8.17
  -1   8   0   19.72    6.48
   8  -7   0   17.81    9.47
   7   1   0   16.23    6.08
  -7  -1   0   21.61    7.08
  -8   7   0   34.58   15.68
   7   1   1 1472.17   41.20
   8  -7   1 1446.17   58.91
  -1   8   1 1599.99   67.82
  -1   8   1 1350.26   57.72
  -8   7   1 1458.11   78.28
  -7  -1   1 1461.54   56.70
  -7  -1   1 1580.64   84.23
   1  -8   1 1445.70   63.98
   8  -7   2  163.98   20.09
  -7  -1   2  141.37   25.82
  -1   8   2  177.03   23.71
  -1   8   2  146.82   20.53
   7   1   2  154.92    9.58
   1  -8   2  162.80   23.11
  -7  -1   2  170.98   21.41
   7   1   2  151.96   11.66
  -8   7   2  141.89   25.90
  -8   7   3  265.79   32.91
  -1   8   3  183.19   26.13
  -8   7   3  216.60   20.12
  -7  -1   3  170.88   22.92
  -7  -1   3  222.52   31.05
   8  -7   3  202.35   22.11
   1  -8   3  192.10   25.77
  -8   7   4  155.05   25.97
   8  -7   4  139.42   18.92
  -7  -1   4  122.89   22.77
  -1   8   4  175.04   27.70
   1  -8   4  110.66   20.88
  -8   7   4  111.30   11.16
  -7  -1   4  145.16   22.74
  -7  -1   5  325.53   37.10
   1  -8   5  347.83   36.80
  -1   8   5  365.70   42.85
  -7  -1   5  379.72   38.57
   8  -7   5  329.47   28.58
  -7  -1   6  523.46   45.04
   8  -7   6  595.91   40.27
   1  -8   6  519.71   47.22
  -1   8   6  513.39   52.80
  -7  -1   6  524.24   47.30
   8  -7   7  733.66   47.11
   1  -8   7  689.52   56.04
  -7  -1   7  744.08   59.21
  -7  -1   7  629.16   47.78
  -1   8   7  711.94   65.52
  -7  -1   8  199.24   26.54
   1  -8   8  199.67   32.08
  -1   8   8  213.04   38.19
  -7  -1   8  222.80   34.66
   8  -7   8  188.41   24.92
   1  -8   9  169.43   31.66
   8  -7   9  156.49   23.79
  -7  -1   9  146.51   29.77
  -1   8   9  137.21   33.04
   7   1  10   47.62   21.05
   8  -7  10   42.91   13.89
   1  -8  10   54.00   19.26
  -7  -1  10   60.01   20.60
  -1   8  10   -9.62   14.70
   8  -7  10   19.58   13.82
   8  -7  11   70.29   21.88
   7   1  11  109.64   32.66
   1  -8  11   75.33   24.61
  -1   8  11   58.44   24.45
  -7  -1  11   71.33   24.13
   7   1  12    3.21    9.70
   1  -8  12    7.12   12.60
  -1   8  12    5.90   12.26
  -7  -1  12   -2.98   14.77
   8  -7  12   15.74   12.82
   7   1  13   -0.16   11.41
   1  -8  13    2.53   12.03
  -1   8  13   17.63   19.06
  -7  -1  13    6.06   12.18
   1  -8  14   58.02   24.42
   7   1  14   47.52   28.87
   2  -8 -14    9.19   13.91
   8  -6 -14    1.54   11.43
  -8   6 -14  -26.92   20.17
   2  -8 -13   11.11   12.30
  -8   6 -13   -9.02   16.68
   8  -6 -12  189.07   40.82
  -8   6 -12  234.31   50.69
   6   2 -12  178.59   30.28
   2  -8 -12  205.21   35.70
   2  -8 -11   -2.32   14.07
   8  -6 -11  -18.93   17.00
  -6  -2 -11   14.26   11.18
   6   2 -11   19.27   10.05
  -8   6 -11    4.41    9.30
   6   2 -10   29.28   14.39
  -6  -2 -10   33.95   17.41
   8  -6 -10   19.43   14.34
   2  -8 -10    1.72   12.12
  -8   6 -10    3.77    7.58
   8  -6  -9  287.94   43.96
   6   2  -9  262.37   33.95
  -6  -2  -9  297.68   42.15
   2  -8  -9  303.26   38.44
  -8   6  -9  255.01   36.27
   8  -6  -8   36.68   14.80
   2  -8  -8   31.38   15.20
   6   2  -8   52.02   15.69
  -6  -2  -8   63.11   20.44
  -8   6  -8   42.69   15.61
   8  -6  -7   12.45   12.96
   6   2  -7   21.95   11.13
   2  -8  -7   10.55   11.87
  -6  -2  -7    2.23   11.09
  -8   6  -7   14.36    9.51
   8  -6  -6  107.48   23.78
   6   2  -6  126.07   21.56
   2  -8  -6  143.41   24.25
  -6  -2  -6  101.56   23.60
  -6  -2  -6  125.75    8.74
  -8   6  -6  119.54   24.36
  -6  -2  -6  133.76   10.11
  -6  -2  -5   22.43   14.50
   6   2  -5   45.10   13.04
   8  -6  -5   53.38   16.61
  -6  -2  -5   40.33    5.05
  -8   6  -5   23.60   13.29
  -6  -2  -5   31.16    4.57
   2  -8  -5   59.87   16.90
  -6  -2  -4   11.35    3.31
   2  -8  -4   10.37   10.65
  -6  -2  -4   -2.92    9.33
   8  -6  -4   14.29   10.92
   6   2  -4   25.97   11.60
  -8   6  -4   -7.71   11.38
  -6  -2  -3  950.60   29.87
  -8   6  -3  954.63   64.95
   2  -8  -3 1078.73   54.46
  -6  -2  -3 1029.42   69.93
   8  -6  -3  972.57   58.79
  -6  -2  -2   63.86   19.95
   8  -6  -2   60.82   14.99
  -6  -2  -2   57.29    8.75
   2  -8  -2   57.29   13.20
  -8   6  -2   48.32   16.32
   8  -6  -1  284.05   28.99
   2  -8  -1  277.38   26.73
  -6  -2  -1  249.59   19.85
  -8   6  -1  199.34   29.43
  -6  -2  -1  316.32   38.29
   2  -8   0 2913.15   85.52
   6   2   0 2814.75   65.84
  -8   6   0 2827.10  106.88
  -6  -2   0 2862.24   73.91
   8  -6   0 2834.62   82.87
  -6  -2   0 2873.21  113.11
  -2   8   1  270.63   27.43
  -6  -2   1  264.88   34.26
  -2   8   1  246.36   23.51
   6   2   1  263.80   18.29
   2  -8   1  262.12   27.42
  -6  -2   1  267.64   25.17
   8  -6   1  225.69   22.70
  -8   6   1  282.16   33.95
   6   2   2   75.89    8.11
   8  -6   2   49.49   10.71
  -6  -2   2   53.02   16.52
  -2   8   2   65.22   13.12
   2  -8   2   70.86   15.46
  -6  -2   2   50.93   12.77
  -2   8   2   50.54   12.48
  -8   6   2   66.35   18.62
   2  -8   3 1041.25   55.68
   8  -6   3 1027.96   45.38
  -2   8   3 1092.58   49.99
  -2   8   3 1064.22   59.17
  -8   6   3  956.45   60.64
  -6  -2   3 1028.07   55.84
   6   2   3  957.34   23.63
  -6  -2   3  970.84   63.23
  -6  -2   4   26.74   13.15
   8  -6   4    9.36    5.28
  -8   6   4    9.15    3.42
   2  -8   4   16.57    8.94
  -2   8   4   14.64   11.11
  -6  -2   4   10.61    8.67
  -8   6   4    8.07    8.32
  -6  -2   5   42.25   13.84
   8  -6   5   35.65    8.96
   2  -8   5   46.09   15.02
  -6  -2   5   75.92   19.11
  -2   8   5   49.01   16.45
  -8   6   5   48.65   14.56
  -6  -2   6  142.70   23.19
   8  -6   6  128.36   17.28
   2  -8   6  122.31   22.25
  -6  -2   6   83.11   19.46
  -2   8   6  135.45   26.60
  -6  -2   7   16.43    8.28
   2  -8   7   15.62    8.94
   8  -6   7   19.08    8.44
  -6  -2   7   13.71   12.34
  -2   8   7   32.13   15.94
  -6  -2   8   50.17   13.49
   2  -8   8   36.91   13.75
   8  -6   8   59.75   13.49
  -2   8   8   45.40   18.41
  -6  -2   8   33.49   15.08
   8  -6   9  285.75   29.55
   6   2   9  276.28   45.07
   2  -8   9  344.59   42.95
  -2   8   9  278.65   44.93
  -6  -2   9  290.33   40.71
   8  -6  10   21.64   13.23
   2  -8  10   20.89   12.19
  -2   8  10   16.87   16.66
  -6  -2  10   17.86   16.70
  -2   8  11   25.43   17.00
   2  -8  11    3.95   10.39
  -6  -2  11   17.09   15.58
   6   2  11  -11.16   15.18
   8  -6  11   -3.61    9.42
   8  -6  12  191.54   38.20
   6   2  12  186.21   44.01
   2  -8  12  225.91   40.31
  -6  -2  12  179.38   36.19
   6   2  13   15.34   19.29
   2  -8  13    4.27   15.78
   8  -6  13  -20.43   14.74
  -6  -2  13    0.17   11.51
   6   2  14  -21.15   18.67
   2  -8  14  -12.29   14.72
   3  -8 -15    7.84   16.31
   3  -8 -14   35.44   19.06
   8  -5 -14   30.32   21.88
  -8   5 -14   20.94   21.14
   8  -5 -13   38.77   23.58
   5   3 -13   37.32   16.86
   3  -8 -13   86.27   26.68
   3  -8 -12   20.22   15.04
   8  -5 -12  -13.17   16.13
   5   3 -12   13.43   11.72
   5   3 -11  160.45   29.40
   8  -5 -11  219.08   43.46
   3  -8 -11  176.34   33.09
  -5  -3 -11  164.45   30.92
  -8   5 -11  166.25   29.59
   8  -5 -10   35.62   21.91
   5   3 -10   61.90   19.29
  -5  -3 -10   91.58   23.04
   3  -8 -10   53.40   19.29
  -8   5 -10   73.45   20.15
   8  -5  -9  258.17   41.61
   3  -8  -9  209.52   33.28
   5   3  -9  264.99   36.18
  -5  -3  -9  229.57   36.12
  -8   5  -9  225.50   34.52
   3  -8  -8    3.79   12.77
   8  -5  -8   15.54   14.00
  -5  -3  -8   22.47    6.57
   5   3  -8    8.18   10.96
  -5  -3  -8   17.71   11.51
  -8   5  -8    3.96   11.03
   8  -5  -7   -3.11   11.41
   3  -8  -7   -4.09   13.92
  -5  -3  -7   -8.65   14.09
  -5  -3  -7    4.03    4.09
   5   3  -7    0.19    8.43
  -8   5  -7   -3.55   10.73
   3  -8  -6  497.95   43.75
  -8   5  -6  436.16   27.37
  -8   5  -6  388.85   42.27
   5   3  -6  391.43   38.31
  -5  -3  -6  357.91   21.57
  -5  -3  -6  389.33   17.72
   8  -5  -6  450.76   47.63
  -5  -3  -6  408.67   45.80
   3  -8  -5  367.37   36.63
  -8   5  -5  361.76   25.01
   5   3  -5  343.73   34.64
  -8   5  -5  312.78   37.93
  -5  -3  -5  365.76   19.56
   8  -5  -5  328.02   38.39
  -5  -3  -5  347.99   41.78
   8  -5  -4   73.40   18.48
   3  -8  -4   68.96   16.93
  -5  -3  -4   60.70    8.40
   5   3  -4   77.01   16.17
  -5  -3  -4   69.03   20.64
  -8   5  -4   79.43   12.62
  -8   5  -4   79.28   19.77
  -8   5  -3  241.25   21.93
   3  -8  -3  231.61   26.45
   8  -5  -3  226.51   28.39
  -5  -3  -3  195.40   30.57
   5   3  -3  233.75   27.19
  -5  -3  -3  253.80   17.70
  -8   5  -3  219.82   31.62
   3  -8  -2  309.60   29.43
   8  -5  -2  242.47   27.85
  -5  -3  -2  293.21   20.74
  -5  -3  -2  266.58   34.95
   3  -8  -2  263.27   27.29
  -8   5  -2  268.41   34.13
  -8   5  -2  274.76   24.75
  -8   5  -1  788.57   56.50
   3  -8  -1  654.68   40.73
  -5  -3  -1  658.25   33.37
   3  -8  -1  617.08   37.23
   8  -5  -1  622.88   40.91
  -8   5  -1  669.57   40.67
  -5  -3  -1  710.29   55.85
   8  -5   0  262.01   25.03
   3  -8   0  272.09   26.82
   5   3   0  278.37   21.28
  -5  -3   0  252.53   22.48
  -8   5   0  233.69   30.65
  -5  -3   0  333.58   38.37
   5   3   1  709.91   29.62
   8  -5   1  697.84   37.15
  -5  -3   1  741.22   40.99
  -8   5   1  714.13   53.01
   3  -8   1  710.44   43.10
  -5  -3   1  689.66   54.60
   5   3   2  349.35   20.05
   8  -5   2  346.12   24.69
  -8   5   2  348.39   36.89
   3  -8   2  376.05   32.09
  -5  -3   2  381.37   31.78
  -3   8   2  362.46   28.99
  -5  -3   2  315.17   37.10
   8  -5   3  215.71   19.10
   3  -8   3  205.74   25.24
  -3   8   3  180.32   19.17
  -5  -3   3  194.89   24.99
  -8   5   3  227.98   29.37
  -5  -3   3  210.63   29.68
   5   3   3  181.09   14.51
   5   3   4   35.91    6.46
  -5  -3   4   76.39   19.03
  -8   5   4   53.92    8.60
   8  -5   4   54.83    8.92
   3  -8   4   49.29   14.10
  -5  -3   4   33.69   12.89
  -8   5   4   53.08   14.83
   8  -5   5  349.94   23.43
  -8   5   5  369.91   36.60
   3  -8   5  328.06   33.86
  -5  -3   5  338.96   36.03
  -5  -3   5  336.57   36.66
   8  -5   6  415.54   27.02
  -8   5   6  423.23   39.16
  -5  -3   6  466.60   41.74
  -5  -3   6  420.84   42.39
  -8   5   6  385.30   18.73
   3  -8   6  378.56   38.17
  -8   5   7    5.43    7.57
  -5  -3   7    6.85    7.95
  -5  -3   7   11.02   11.70
   3  -8   7  -10.80   12.20
   8  -5   7   -0.24    3.61
  -5  -3   8   13.33    7.35
   5   3   8   24.03   16.46
   3  -8   8   30.27   12.92
   8  -5   8   23.30    8.40
  -5  -3   8   50.56   17.74
   8  -5   9  196.65   22.42
   3  -8   9  231.28   35.90
  -5  -3   9  205.89   34.20
   5   3   9  216.11   40.70
   8  -5  10   53.88   20.25
   3  -8  10   71.80   22.62
  -5  -3  10   76.87   23.72
   5   3  10   77.88   24.86
   8  -5  11  133.11   31.07
   3  -8  11  165.88   32.71
   5   3  11  167.75   40.08
  -5  -3  11  169.76   34.71
   5   3  12  -25.51   20.74
   8  -5  12   21.24   15.90
   3  -8  12    0.86    9.88
  -5  -3  12    7.96   11.44
   8  -5  13   67.58   25.89
   3  -8  13   60.14   21.46
   5   3  13   32.30   22.39
  -5  -3  13   57.42   22.74
   3  -8  14  -31.02   17.76
   5   3  14   -6.90   14.75
  -5  -3  14    2.53   11.49
   3  -8  15   -1.75    8.53
   4  -8 -15   80.22   30.30
   8  -4 -14  -19.17   20.17
   4  -8 -14   25.41   21.34
   4  -8 -13   58.31   25.18
   8  -4 -13   25.19   20.01
  -4   8 -12   78.89   30.52
   8  -4 -12  111.70   33.53
   4  -8 -12   93.57   28.07
   4  -8 -11  117.78   28.11
  -4   8 -11  103.79   31.83
  -4  -4 -11   86.88   22.28
   8  -4 -11   98.84   31.55
  -8   4 -11  119.11   25.87
  -4   8 -10    0.06   12.64
   4  -8 -10   14.03   15.23
  -4  -4 -10   18.69   12.80
  -8   4 -10   -2.27   10.64
   8  -4 -10    7.87   10.81
   8  -4  -9  294.93   44.81
   4  -8  -9  224.27   35.18
  -4   8  -9  325.92   49.76
  -4  -4  -9  279.82   26.08
  -4  -4  -9  278.01   39.03
  -8   4  -9  215.07   33.28
   8  -4  -8   22.01   14.72
   4   4  -8   34.06   15.03
  -4  -4  -8   17.85    9.69
   4  -8  -8   32.97   14.11
  -8   4  -8   37.57   15.05
  -4   8  -8   30.08   17.37
  -4  -4  -8   35.90    9.78
  -4  -4  -7   59.36   10.63
   8  -4  -7   48.30   17.36
   4  -8  -7   28.28   13.18
  -4  -4  -7   59.09   19.51
  -4   8  -7   87.45   25.86
  -8   4  -7   86.16   21.68
   4   4  -7   75.05   19.80
  -8   4  -6  308.51   20.59
   4   4  -6  299.02   34.99
  -4  -4  -6  267.58   37.53
  -4  -4  -6  335.55   21.41
   8  -4  -6  305.09   38.88
  -8   4  -6  302.86   37.89
   4  -8  -6  292.29   35.67
  -4   8  -6  274.06   40.46
  -4  -4  -5   63.79   19.62
  -4   8  -5   93.53   23.80
   4  -8  -5   45.33   16.81
   4   4  -5   69.61   17.72
  -4  -4  -5   53.84    8.57
   8  -4  -5   40.98   15.64
  -8   4  -5   63.25   18.71
  -8   4  -5   76.60   10.80
   8  -4  -4   37.61   14.39
   4  -8  -4   48.45   10.13
   4  -8  -4   46.79   13.86
  -4  -4  -4   61.91   17.89
   4   4  -4   51.01   14.69
  -8   4  -4   64.11   10.14
  -8   4  -4   62.74   17.50
  -4   8  -4   31.48   13.92
   4  -8  -3 1292.39   63.26
   4   4  -3 1270.05   63.43
  -8   4  -3 1279.81   73.79
  -4  -4  -3 1260.79   42.92
   4  -8  -3 1241.86   53.65
  -4  -4  -3 1253.43   76.09
   8  -4  -3 1227.52   64.76
  -8   4  -3 1224.39   44.74
   8  -4  -2  146.51   21.25
   4  -8  -2  187.50   22.53
  -4  -4  -2  183.90   30.21
  -8   4  -2  180.71   18.44
   4  -8  -2  167.94   22.52
   4   4  -2  165.88   22.85
  -4  -4  -2  196.76   18.05
  -8   4  -2  201.78   30.31
   8  -4  -1  154.71   20.01
  -4  -4  -1  128.90   24.50
  -4  -4  -1  135.76   15.89
  -8   4  -1  138.14   17.35
   4   4  -1  151.34   21.68
   4  -8  -1  144.52   21.56
   4  -8  -1  136.70   18.57
  -8   4  -1  123.81   24.11
   4  -8   0 2755.71   82.50
  -8   4   0 2708.40  103.61
  -4  -4   0 2743.68   75.31
   4  -8   0 2714.04   72.07
   8  -4   0 2658.87   74.49
   8  -4   0 2668.76   69.74
  -8   4   0 2627.83   81.07
  -4  -4   0 2804.82  109.20
   8  -4   1  163.75   17.36
  -4  -4   1  191.56   29.33
   4  -8   1  161.14   21.00
   4   4   1  134.90   14.41
  -4  -4   1  127.70   17.68
  -8   4   1  147.54   24.90
   4  -8   1  167.28   14.99
  -4  -4   2  182.05   28.27
   4   4   2  182.21   16.60
   4  -8   2  168.68   11.35
   4  -8   2  191.24   23.21
   8  -4   2  178.32   16.41
  -4  -4   2  152.25   20.62
  -8   4   2  142.76   24.24
  -4   8   3 1302.06   47.90
  -8   4   3 1240.68   66.93
   4  -8   3 1320.28   60.27
  -4  -4   3 1236.03   60.81
   8  -4   3 1321.40   40.45
  -4  -4   3 1278.53   72.79
   4   4   3 1305.31   45.59
   4   4   4   54.71    9.83
  -4  -4   4   83.19   19.43
  -8   4   4   61.67   10.57
   8  -4   4   56.09    7.52
  -4  -4   4   56.94   15.94
  -8   4   4   46.70   13.19
   4  -8   4   53.18   13.63
  -4  -4   5   56.82   16.03
   4   4   5   78.18   12.35
   4  -8   5   87.83   17.66
   8  -4   5   70.90    8.50
  -4  -4   5   83.05   20.00
  -8   4   5   59.91   15.53
   4  -8   6  370.30   37.02
  -8   4   6  309.99   32.30
   8  -4   6  310.46   18.90
  -4  -4   6  385.13   41.00
  -4  -4   6  339.08   36.38
   4   4   7   47.09   17.76
  -4  -4   7   63.79   16.04
   4  -8   7   58.30   16.96
  -4  -4   7   76.32   20.18
   8  -4   7   70.74   10.12
  -8   4   7   60.23   14.48
   4  -8   8   50.39   15.80
   4   4   8   38.05   18.78
  -4  -4   8   25.82   10.20
  -4  -4   8   34.43   17.05
   8  -4   8   20.98    6.15
  -8   4   8   27.16    9.80
   4  -8   9  244.68   34.68
  -4  -4   9  260.34   37.76
   4   4   9  198.58   38.86
   4   4  10   15.88   18.34
   4  -8  10   18.02   14.46
  -4  -4  10    7.68   12.23
   4   4  11  102.43   33.21
   8  -4  11  124.52   31.29
   4  -8  11  130.37   29.56
  -4  -4  11  107.30   27.64
   8  -4  12   67.28   25.43
   4  -8  12   75.64   24.62
   4   4  12  162.37   42.64
  -4  -4  12  104.00   28.41
   4   4  13   34.38   22.27
   8  -4  13   15.85   12.80
   4  -8  13    9.55   11.62
  -4  -4  13   23.63   16.45
   4  -8  14  -22.63   15.57
   8  -4  14    8.12   12.66
   4   4  14   -5.22   12.17
  -4  -4  14   27.95   18.03
   8  -4  15    7.02   11.39
   4  -8  15   29.21   17.21
  -5   8 -14   30.44   18.31
   8  -3 -14   36.59   22.71
   5  -8 -14   16.27   17.04
   8  -3 -13   25.06   18.87
   5  -8 -13   -1.91   10.68
  -5   8 -13   14.28   16.71
   5  -8 -12   37.15   19.79
  -5   8 -12   38.76   25.21
   8  -3 -12   53.05   25.33
   8  -3 -11  206.14   42.62
   5  -8 -11  217.40   38.78
  -3  -5 -11  124.87   25.53
  -8   3 -11  149.48   28.18
  -5   8 -11  159.92   38.51
   5  -8 -10  102.31   27.16
  -5   8 -10   60.22   25.05
  -3  -5 -10   62.21   14.92
  -8   3 -10   54.25   17.95
  -3  -5 -10   61.43   20.26
   8  -3 -10   36.70   20.40
   8  -3  -9   51.28   21.59
  -5   8  -9   49.47   22.10
  -8   3  -9   64.34   18.20
   5  -8  -9   83.05   22.50
  -3  -5  -9   84.77   22.85
  -3  -5  -9   58.94   13.80
   8  -3  -8   46.95   21.10
  -5   8  -8   60.04   22.31
   5  -8  -8   87.67   22.65
  -3  -5  -8   86.61   24.01
  -3  -5  -8   85.27   15.50
  -8   3  -8   77.25   20.21
   8  -3  -7   48.20   18.48
  -3  -5  -7   40.80   18.13
   5  -8  -7   42.07   18.10
  -3  -5  -7   44.25   11.21
  -5   8  -7   44.69   19.32
  -8   3  -7   20.12   12.79
   8  -3  -6    0.32   11.89
   5  -8  -6   -0.26   13.41
   3   5  -6   -0.81   13.36
  -5   8  -6   -1.84   11.60
  -3  -5  -6    0.24   11.11
  -8   3  -6    2.35    2.50
  -3  -5  -6   11.56    7.49
  -8   3  -6   -3.36   10.74
  -3  -5  -5  128.55   25.97
  -5   8  -5  135.66   29.25
   5  -8  -5   92.48   22.01
   3   5  -5  140.27   24.17
   8  -3  -5  112.90   24.09
  -8   3  -5  119.15   24.51
  -3  -5  -5  128.93   15.21
  -8   3  -5  135.99   11.31
   5  -8  -4  620.08   47.53
  -8   3  -4  597.07   52.62
  -3  -5  -4  675.82   32.22
   5  -8  -4  572.83   30.76
  -5   8  -4  664.51   56.72
   3   5  -4  575.29   46.18
  -8   3  -4  604.34   24.32
  -3  -5  -4  632.46   55.52
   8  -3  -4  670.38   51.81
   8  -3  -3  799.50   53.09
   3   5  -3  724.28   49.83
  -8   3  -3  734.95   57.16
  -3  -5  -3  794.85   37.30
   5  -8  -3  748.20   49.80
   5  -8  -3  705.88   38.33
  -5   8  -3  811.63   58.95
  -3  -5  -3  716.86   58.21
  -8   3  -3  746.63   29.64
   5  -8  -2 1195.11   59.09
   3   5  -2 1271.39   63.24
  -5   8  -2 1248.04   70.01
  -3  -5  -2 1266.82   47.60
   5  -8  -2 1209.91   54.61
  -8   3  -2 1315.56   74.65
  -3  -5  -2 1211.07   74.27
  -8   3  -2 1226.66   42.32
   8  -3  -2 1338.89   63.17
   5  -8  -1  897.10   49.79
  -8   3  -1  880.76   61.22
   3   5  -1  924.29   52.60
   5  -8  -1  914.44   49.76
  -3  -5  -1  911.00   42.29
   8  -3  -1  917.35   47.71
   8  -3   0   38.09   10.60
  -3  -5   0   31.70    9.16
   3   5   0   38.22   12.72
  -8   3   0   47.01   15.45
   8  -3   0   36.02    8.86
   5  -8   0   36.86   13.22
  -8   3   1 1009.17   63.16
  -3  -5   1  937.31   47.95
   8  -3   1  848.77   33.95
   5  -8   1  895.67   47.54
   8  -3   1  896.33   37.81
   3   5   2 1283.37   48.76
  -8   3   2 1356.57   71.56
   8  -3   2 1316.06   38.39
   5  -8   2 1345.18   59.03
  -3  -5   2 1298.60   59.36
   8  -3   2 1267.38   35.31
  -5   8   3  821.96   36.01
  -8   3   3  725.47   52.21
   8  -3   3  799.38   26.11
   8  -3   3  777.66   20.66
   5  -8   3  841.79   47.67
  -3  -5   3  738.83   47.15
   8  -3   3  718.38   21.00
   3   5   3  791.81   40.50
  -8   3   4  668.29   38.39
  -8   3   4  699.14   50.45
   5  -8   4  733.69   45.61
  -5   8   4  659.02   27.72
  -3  -5   4  705.33   48.73
   3   5   4  700.72   39.76
   5  -8   5  136.55   14.27
   3   5   5  105.18   16.43
   5  -8   5  124.58   19.79
  -3  -5   5  140.67   23.62
  -8   3   5  131.97   21.72
   5  -8   6    2.87    3.82
  -3  -5   6    2.29    6.95
   5  -8   6    0.30    9.91
  -3  -5   6   12.69   12.39
  -8   3   6   -5.08    8.91
   3   5   6   10.92   12.70
  -3  -5   7   61.07   16.01
   3   5   7   51.72   20.55
   5  -8   7   57.13   12.33
   5  -8   7   60.83   15.45
  -3  -5   7   30.68   14.19
  -8   3   7   47.41   12.53
   5  -8   8   88.99   16.33
   5  -8   8   71.99   18.57
   3   5   8   49.32   20.91
  -3  -5   8   77.26   21.78
  -3  -5   8   56.07   15.43
  -8   3   8   53.70   13.42
  -3  -5   9   48.98   13.38
   3   5   9   55.99   21.74
   5  -8   9   33.66   14.09
  -3  -5   9   46.91   18.85
   5  -8   9   59.73   14.49
   5  -8  10   80.55   23.16
  -3  -5  10   63.75   21.25
   3   5  10   37.22   21.07
   8  -3  11  163.91   35.66
   5  -8  11  200.46   34.68
   3   5  11  166.40   39.51
  -3  -5  11  215.57   37.62
   3   5  12   31.15   22.84
   5  -8  12   11.47   14.11
  -3  -5  12   40.45   16.79
   8  -3  12   33.48   18.69
   3   5  13  -25.26   21.06
   8  -3  13   18.13   16.54
  -3  -5  13   -2.02   11.87
   5  -8  13   -6.91   11.48
   3   5  14   53.16   27.43
   5  -8  14   28.91   16.82
  -3  -5  14   49.54   23.19
   8  -3  14   56.71   26.85
   8  -3  15   -4.10   13.23
  -6   8 -14   -0.09   17.11
   6  -8 -14   -5.30   13.33
   8  -2 -13  -11.21   18.51
   6  -8 -13   14.50   17.88
  -6   8 -13   33.98   21.93
   8  -2 -12   68.38   29.11
   6  -8 -12  139.05   33.94
  -6   8 -12  125.16   38.32
  -6   8 -11   30.16   18.93
  -2  -6 -11   35.26   14.25
   6  -8 -11   24.10   13.37
  -2  -6 -11   38.97   15.67
  -8   2 -11   25.47   14.52
   8  -2 -11    4.24   15.59
   6  -8 -10   43.16   20.22
  -2  -6 -10   33.93   12.35
  -2  -6 -10   32.24   15.47
  -8   2 -10   33.87   16.00
  -6   8 -10   53.69   23.74
   8  -2 -10   26.30   18.91
  -2  -6  -9  182.23   24.67
   6  -8  -9  228.89   36.98
  -2  -6  -9  172.32   32.56
  -8   2  -9  158.94   30.18
  -6   8  -9  190.87   39.12
   8  -2  -9  151.38   33.63
  -2  -6  -8   74.33   16.19
  -2  -6  -8   72.41   21.71
  -8   2  -8   86.25   22.41
   6  -8  -8   91.98   24.41
  -6   8  -8   64.35   24.01
   8  -2  -8   74.70   23.67
  -2  -6  -7  172.66   31.40
  -6   8  -7  171.98   35.55
   6  -8  -7  181.00   30.44
  -8   2  -7  177.22   30.85
   8  -2  -7  243.78   38.77
  -2  -6  -7  167.70   21.65
  -2  -6  -6 1096.33   50.18
  -8   2  -6  912.59   68.05
  -6   8  -6 1095.67   81.35
  -2  -6  -6 1120.55   77.13
   8  -2  -6  983.91   71.45
   6  -8  -6 1028.55   67.32
   6  -8  -5    0.57   17.36
  -2  -6  -5   28.32    9.24
  -8   2  -5   28.17   15.02
  -6   8  -5   33.37   16.80
   8  -2  -5   18.38   11.53
   2   6  -4   14.84    9.18
   6  -8  -4   16.53   15.10
  -6   8  -4   10.49   11.19
  -8   2  -4   18.85   11.99
  -2  -6  -4   16.73    6.99
   8  -2  -4   16.55    8.94
  -8   2  -3  667.92   55.97
   2   6  -3  686.12   51.00
  -2  -6  -3  670.61   35.43
   6  -8  -3  669.57   48.41
  -6   8  -3  693.34   55.47
   8  -2  -3  669.88   49.80
  -6   8  -2    5.88    8.19
   8  -2  -2   18.31    9.08
   2   6  -2   16.05   10.28
  -2  -6  -2   18.71    8.13
  -8   2  -2   25.26   14.69
   6  -8  -2   41.14   16.01
   8  -2  -1   27.85    9.54
  -6   8  -1   67.47   16.47
   6  -8  -1   67.78   17.15
   2   6  -1   52.28   14.13
  -8   2  -1   36.46   14.72
  -2  -6  -1   62.95   13.01
   8  -2  -1   54.44   10.78
  -8   2   0 1311.31   74.58
   6  -8   0 1401.32   60.77
  -6   8   0 1363.99   65.00
  -2  -6   0 1354.87   56.04
   8  -2   0 1215.68   45.09
   2   6   0 1425.35   65.27
   8  -2   0 1252.08   49.38
   8  -2   1   56.65    9.64
   6  -8   1   67.93   14.90
  -2  -6   1   57.95   13.09
   8  -2   1   47.57    7.79
  -8   2   1   24.39   11.33
   8  -2   2   23.13    5.13
   6  -8   2    9.84    7.83
  -8   2   2   23.27   12.26
   8  -2   2   18.91    3.82
  -2  -6   2   18.74    8.84
   6  -8   3  810.42   46.34
  -2  -6   3  763.81   49.12
  -8   2   3  787.39   55.49
   6  -8   4   42.98   12.21
  -8   2   4   12.84    8.36
  -2  -6   4   22.48   11.77
  -6   8   4   24.13    4.75
  -8   2   4   12.29    9.28
   2   6   4    9.06    8.78
  -8   2   5   26.16   11.53
  -2  -6   5   14.27   10.21
   2   6   5   52.29   18.36
   6  -8   5   24.36    9.97
  -8   2   5   45.03   14.75
   6  -8   6  929.38   56.16
  -2  -6   6  913.44   61.88
   2   6   6  847.90   69.28
  -8   2   6  903.95   59.33
  -8   2   6  853.55   55.08
   6  -8   7  144.67   20.75
   2   6   7  144.98   32.08
   6  -8   7  171.16   26.34
  -8   2   7  168.80   24.00
  -2  -6   7  186.55   30.11
  -8   2   7  203.33   30.11
   2   6   8   57.30   20.90
   6  -8   8   89.04   18.34
   6  -8   8   84.27   19.74
  -2  -6   8   38.48   15.30
  -8   2   8   59.42   13.51
  -8   2   8   49.39   17.44
  -2  -6   9  162.34   24.68
   6  -8   9  186.69   27.94
   6  -8   9  178.03   28.72
  -2  -6   9  146.07   29.96
   2   6   9  188.58   39.44
   2   6  10    7.47   11.88
   6  -8  10   15.25    9.52
  -2  -6  10   -2.27   10.70
   8  -2  11   50.78   22.31
   2   6  11   52.58   22.40
   6  -8  11   23.99   13.91
  -2  -6  11    8.87   13.01
   8  -2  12  130.64   34.95
   2   6  12   79.42   30.11
   6  -8  12  159.96   31.50
  -2  -6  12  174.61   35.93
   8  -2  13  -14.43   15.03
   6  -8  13   -0.60   10.11
  -2  -6  13   19.66   18.75
   8  -2  14  -10.17   13.66
  -2  -6  14   -2.80   12.94
   7  -8 -14   81.42   30.92
  -7   8 -14   36.16   27.28
  -7   8 -13    7.29   16.59
   7  -8 -13   17.42   17.12
   8  -1 -13    4.40   16.85
   7  -8 -12   68.33   26.13
  -7   8 -12   32.62   21.99
   8  -1 -12   24.64   19.05
   7  -8 -11   -5.02   13.15
  -1  -7 -11   -9.08   11.37
  -8   1 -11   11.41   11.79
  -7   8 -11   -1.11   15.36
   8  -1 -11   13.13   12.63
  -1  -7 -10  117.11   26.90
  -1  -7 -10  102.56   21.47
   8  -1 -10  135.42   34.02
   7  -8 -10  182.53   36.21
  -8   1 -10  120.84   28.47
  -7   8 -10   68.11   26.68
  -1  -7  -9   59.87   21.05
  -1  -7  -9   59.91   16.10
   8  -1  -9   57.95   21.40
  -8   1  -9   52.85   20.09
   7  -8  -9   20.21   17.47
  -7   8  -9   57.66   26.26
  -1  -7  -8  315.79   32.74
   7  -8  -8  304.69   41.74
  -1  -7  -8  310.25   43.28
  -8   1  -8  223.01   36.50
  -7   8  -8  356.77   52.48
  -8   1  -7  449.27   50.49
  -1  -7  -7  507.13   39.14
  -7   8  -7  509.74   59.92
   7  -8  -7  501.88   51.15
   7  -8  -6   33.19   18.15
   1   7  -6   24.15    7.53
  -8   1  -6   33.70   16.59
  -1  -7  -6   39.47   12.94
  -7   8  -6    9.65   11.71
  -8   1  -5  842.38   66.91
  -1  -7  -5  878.25   46.64
  -7   8  -5  899.99   72.45
   1   7  -5  790.91   35.81
   7  -8  -5  760.35   57.90
  -1  -7  -4  198.91   22.29
   7  -8  -4  177.11   28.59
  -8   1  -4  160.58   30.76
  -7   8  -4  174.45   31.41
   7  -8  -3  253.09   31.98
  -1  -7  -3  276.18   25.42
  -8   1  -3  280.53   38.16
   1   7  -3  204.19   28.80
  -7   8  -3  241.18   34.01
   8  -1  -3  248.30   30.83
  -8   1  -2  469.33   48.46
   7  -8  -2  552.82   43.38
  -1  -7  -2  477.30   33.25
   1   7  -2  544.89   45.10
  -7   8  -2  481.89   45.38
   8  -1  -2  538.95   41.60
   8  -1  -1   14.61    7.85
   7  -8  -1   19.66   12.75
  -1  -7  -1    2.76    6.97
  -8   1  -1    6.99   11.69
   1   7  -1   12.98    9.19
  -7   8  -1   11.78    9.40
   8  -1   0  145.06   17.45
   7  -8   0  193.50   23.83
   1   7   0  180.67   24.28
  -8   1   0  117.48   25.09
   8  -1   0  163.89   16.37
  -1  -7   0  167.22   21.27
  -7   8   0  175.14   24.01
  -7   8   1   38.47   10.89
  -8   1   1    8.49    9.81
   1   7   1    9.62    9.36
  -1  -7   1   18.46    9.13
   7  -8   1   31.33   11.83
   8  -1   1   21.98    5.24
   8  -1   1   17.09    5.44
  -8   1   1    9.16    5.11
   8  -1   2  498.51   18.49
  -8   1   2  477.24   45.41
   7  -8   2  497.38   36.47
   8  -1   2  508.42   16.80
  -1  -7   2  548.41   40.79
   1   7   2  588.03   44.98
  -8   1   2  476.25   33.96
  -7   8   2  541.29   35.25
  -8   1   3  268.74   33.57
   7  -8   3  255.68   26.86
   7  -8   3  313.51   28.78
  -1  -7   3  265.15   29.97
   1   7   3  287.74   33.68
  -8   1   3  250.17   26.36
  -8   1   4  130.61   23.22
   7  -8   4  142.64   20.36
  -1  -7   4  127.68   22.19
   1   7   4  111.49   23.23
  -8   1   4  124.98   20.52
  -8   1   5  813.59   56.89
   7  -8   5  881.74   50.82
  -1  -7   5  881.33   58.49
   1   7   5  839.17   66.30
  -8   1   5  867.83   56.09
   1   7   6   36.50   15.93
   7  -8   6   43.40   12.91
  -8   1   6   52.01   15.35
  -1  -7   6   36.17   16.11
  -8   1   6   17.08   12.01
  -1  -7   7  503.34   48.45
  -8   1   7  459.62   40.53
   1   7   7  524.20   59.16
  -8   1   7  527.96   48.90
   7  -8   7  453.67   41.00
  -8   1   8  279.95   30.40
   7  -8   8  286.81   33.54
   1   7   8  340.49   49.40
  -1  -7   8  285.44   38.55
  -8   1   8  279.62   37.19
   7  -8   8  262.46   33.01
   1   7   9   55.51   23.40
   7  -8   9   38.39   13.95
   7  -8   9   34.80   13.19
  -1  -7   9   36.43   17.62
  -8   1   9   59.57   18.54
   1   7  10  140.69   35.61
   7  -8  10  102.62   22.78
  -1  -7  10   76.43   22.99
   7  -8  10   80.67   21.29
  -8   1  10   95.96   25.65
   1   7  11  -18.14   18.73
   8  -1  11   22.13   17.62
   7  -8  11   17.50   11.30
  -1  -7  11   17.56   13.86
  -8   1  11   39.57   19.31
   1   7  12    9.23   19.88
   8  -1  12  -24.48   18.75
   7  -8  12   38.79   16.16
  -1  -7  12   19.66   16.30
  -8   1  12    4.99   12.48
   8  -1  13   -8.63   12.58
   1   7  13  -35.15   21.96
   8  -1  14   44.50   24.93
  -1  -7  14   70.55   25.95
   8  -8 -13  -16.14   19.51
  -8   8 -13   -1.31   14.86
   8   0 -13  -40.87   25.63
   8  -8 -12   31.64   18.29
   8   0 -12   33.88   20.20
   0  -8 -12   23.89   14.33
  -8   8 -12   12.88   19.33
   8  -8 -11  -40.77   21.37
   0  -8 -11   -0.48    8.83
  -8   0 -11  -18.82   13.69
  -8   8 -11  -26.41   21.26
   0  -8 -10   -1.86   11.11
   8  -8 -10   22.24   15.39
   0  -8 -10   13.93   11.63
   8   0 -10    6.64    5.89
  -8   0 -10   11.90    9.55
  -8   8 -10   25.25   20.70
   0  -8  -9  237.45   38.44
   8  -8  -9  215.68   38.03
   0  -8  -9  220.95   30.57
  -8   0  -9  175.87   33.87
   8   0  -9  217.09   27.25
  -8   8  -9  229.88   44.96
   8  -8  -8   76.13   23.44
   0  -8  -8   62.31   16.74
  -8   0  -8   75.24   23.77
  -8   8  -8  112.28   32.56
  -8   8  -7   79.86   21.91
   0  -8  -7   71.82   18.38
  -8   8  -7   60.32   24.62
   8  -8  -7   78.19   22.38
  -8   0  -7   50.14   19.63
   0  -8  -6  768.70   49.31
  -8   8  -6  678.05   59.30
  -8   8  -6  782.97   72.43
  -8   0  -6  733.05   65.76
   8  -8  -6  673.80   57.90
  -8   8  -5   14.59   14.48
  -8   0  -5   32.11   14.47
   0  -8  -5    6.22    8.25
   8  -8  -5   21.34   13.42
  -8   8  -5   -7.88   12.77
   0  -8  -4   70.60   15.08
   8  -8  -4   98.85   22.56
  -8   0  -4   75.90   24.05
  -8   8  -4   66.63   20.91
  -8   8  -4   62.51   18.31
  -8   0  -3  797.97   65.44
   0  -8  -3  814.58   45.82
  -8   8  -3  811.54   63.18
  -8   8  -3  741.48   59.76
   8  -8  -3  690.60   52.11
   0   8  -2    6.41    9.82
   8  -8  -2   33.81   14.19
  -8   0  -2   30.78   14.79
  -8   8  -2  -11.73   10.41
   0  -8  -2   14.74    8.55
   0   8  -2   17.62    4.98
  -8   8  -2   22.45   13.43
  -8   8  -1  145.68   26.73
   8  -8  -1  199.75   26.62
   0  -8  -1  169.08   21.50
  -8   0  -1  132.14   27.28
   0   8  -1  160.99   24.31
   0  -8  -1  166.93   22.28
   0   8  -1  138.57   15.54
  -8   0  -1  139.29   13.32
  -8   8  -1  149.85   24.38
  -8   8   0  164.57   28.54
   0   8   0  153.39   23.36
  -8   0   0  168.99   29.66
   0  -8   0  129.52   20.21
   0   8   0  165.87   19.72
   8   0   0  119.37   14.27
  -8   0   0  142.87   15.85
  -8   8   0  154.40   23.44
   8   0   0  126.54   16.91
   8  -8   0  145.41   21.23
   8   0   1  159.69   15.92
   8  -8   1  174.93   22.55
   8   0   1  148.88   13.29
  -8   0   1  122.35   24.48
  -8   8   1  102.38   22.89
   0  -8   1  196.73   24.96
   0   8   1  189.01   23.29
  -8   0   1  154.29   18.58
  -8   8   1  152.46   21.98
   0   8   1  169.51   23.89
   8   0   2   33.89    5.48
   8  -8   2    7.67    7.14
  -8   0   2    7.33    9.24
   0  -8   2   11.79    8.14
   0   8   2   30.57   10.00
  -8   0   2   17.77    7.79
   0   8   2    4.95    6.27
  -8   8   2   13.29    6.30
   8  -8   3  906.08   49.78
  -8   8   3  812.03   38.50
   0   8   3  708.22   53.24
  -8   0   3  754.73   47.69
   0  -8   3  850.23   54.17
  -8   0   3  803.73   60.11
  -8   0   4   53.73   16.30
   8  -8   4   56.76   13.19
   0  -8   4   61.94   16.20
  -8   0   4   58.33   15.05
   0   8   4   76.30   20.55
  -8   0   5    5.21    6.06
   8  -8   5   13.74    8.57
   0  -8   5   21.28   11.07
   0   8   5   15.60   11.72
  -8   0   5   30.18   12.16
   0   8   6  660.38   62.28
  -8   0   6  684.77   53.47
   8  -8   6  657.41   45.81
   0  -8   6  750.06   57.30
  -8   0   6  740.27   56.32
   0   8   7   89.59   25.40
  -8   0   7   48.82   14.77
   8  -8   7   73.27   16.99
   0  -8   7   69.23   19.66
  -8   0   7   89.61   22.45
   0   8   8   74.59   25.38
  -8   0   8   64.26   16.96
   8  -8   8   75.03   18.23
   0  -8   8   70.36   20.99
  -8   0   8   97.94   24.15
   8  -8   9  178.94   30.36
   0   8   9  194.97   40.75
   8  -8   9  214.95   30.23
   0  -8   9  222.53   36.17
  -8   0   9  218.26   35.04
   0   8  10   -0.81   13.61
   8  -8  10   23.54   12.35
   8  -8  10   24.30   11.24
   0  -8  10   10.92   10.37
  -8   0  10   29.79   17.45
   8   0  11   -7.31   12.69
   0  -8  11    0.11   10.03
  -8   0  11    5.75   11.33
   8   0  12   48.84   25.56
   0  -8  12   55.68   22.04
  -8   0  12   63.17   23.41
   0   8  12   55.69   28.28
   8   0  13  -14.96   16.15
   0  -8  13    0.06    9.50
   0   8  13   23.31   19.18
  -8   0  13    2.38   10.87
   9  -8 -13    0.95   15.29
  -9   8 -13   45.47   26.85
   9  -8 -12   37.31   24.01
   1  -9 -12   16.33   13.31
  -8  -1 -11   89.18   25.29
  -9   8 -11   96.71   35.69
   9  -8 -11   57.27   22.82
   1  -9 -11   75.08   21.63
   9  -8 -10   -1.48   13.95
   8   1 -10   14.33    9.00
  -8  -1 -10   29.80   17.13
   1  -9 -10    3.72   10.34
  -9   8 -10   13.91   14.84
   1  -9 -10   15.13   12.27
  -9   8  -9   46.90   17.27
   9  -8  -9   82.06   25.85
   1  -9  -9   56.35   17.64
  -8  -1  -9   48.34   20.47
   8   1  -9   63.87   16.43
  -9   8  -9   37.36   22.10
   9  -8  -8  108.41   27.58
   8   1  -8  126.87   22.46
   1  -9  -8  150.39   26.33
  -8  -1  -8  146.44   32.74
  -9   8  -8   81.66   27.59
  -9   8  -8  127.63   29.51
   1  -9  -7  352.74   37.31
  -8  -1  -7  316.20   45.51
  -9   8  -7  350.23   45.58
   9  -8  -7  358.89   45.49
   9  -8  -6   60.42   21.80
   1  -9  -6   27.94   13.42
  -8  -1  -6   23.91   16.35
  -9   8  -6   44.60   18.27
   1  -9  -5  286.28   31.59
  -8  -1  -5  323.46   45.93
  -9   8  -5  310.05   42.41
   9  -8  -5  297.30   39.24
  -8  -1  -4  128.73   29.18
  -9   8  -4  184.99   33.01
   9  -8  -4  132.84   25.49
   1  -9  -4  138.89   22.20
   1  -9  -3  278.40   29.77
  -8  -1  -3  226.12   36.71
   9  -8  -3  277.22   34.46
  -9   8  -3  301.23   40.60
   9  -8  -2  270.44   32.85
  -8  -1  -2  300.46   41.67
  -8  -1  -2  286.74   17.75
  -9   8  -2  318.65   41.03
   1  -9  -2  318.38   31.05
  -1   9  -1   25.17    6.26
   1  -9  -1   20.72   10.01
  -8  -1  -1   18.79   13.34
   9  -8  -1   37.28   14.81
  -8  -1  -1   21.06    6.31
  -1   9  -1   23.83   12.35
   9  -8   0   70.60   16.03
  -1   9   0   84.79   18.27
  -8  -1   0   60.55   17.59
  -1   9   0   81.68   13.41
   1  -9   0   76.37   17.68
   8   1   0   85.23   12.34
  -8  -1   0   75.71   12.69
  -9   8   0   68.57   20.40
  -1   9   1    5.87    8.56
   9  -8   1   25.53   10.96
  -1   9   1   26.25    9.31
  -8  -1   1   10.71    9.81
   8   1   1   14.97    4.90
   1  -9   1   28.47   12.29
  -8  -1   1   27.69    8.71
  -9   8   1   39.19   16.24
  -1   9   2  309.71   31.55
   9  -8   2  312.44   29.69
   8   1   2  315.71   14.59
  -8  -1   2  341.81   42.40
   1  -9   2  348.64   34.92
  -1   9   2  301.05   32.17
  -9   8   2  298.84   29.22
  -9   8   2  398.63   43.80
  -8  -1   2  341.16   31.19
   8   1   2  300.70   17.04
  -8  -1   3  293.04   39.10
   9  -8   3  287.41   28.72
  -9   8   3  326.98   39.71
   1  -9   3  296.32   33.38
  -1   9   3  270.29   32.56
  -9   8   3  282.87   25.03
  -8  -1   3  277.33   30.80
  -1   9   4   84.52   21.08
  -8  -1   4   93.26   22.51
   9  -8   4  117.32   18.80
  -9   8   4  136.24   13.94
  -8  -1   4  146.78   23.85
   1  -9   4  121.55   23.39
  -8  -1   5  303.32   37.72
  -1   9   5  213.29   33.71
   9  -8   5  308.27   29.70
   1  -9   5  279.72   35.07
  -8  -1   5  284.86   34.13
  -1   9   6   61.71   20.51
  -8  -1   6   27.39   12.82
   9  -8   6   30.05   11.06
   1  -9   6   29.12   16.30
  -8  -1   6   54.26   17.59
  -1   9   7  276.02   42.66
   9  -8   7  312.91   32.60
   1  -9   7  257.26   35.98
  -8  -1   7  263.33   33.81
  -8  -1   7  240.56   35.71
  -1   9   8  127.27   32.05
  -8  -1   8  131.42   23.65
   9  -8   8  195.05   26.28
   1  -9   8  189.83   32.12
  -8  -1   8  153.09   29.07
   1  -9   9   28.84   15.67
   9  -8   9   64.96   17.49
  -8  -1   9   65.77   22.06
  -1   9   9   31.30   17.32
   9  -8  10   16.62   11.53
   1  -9  10   13.57   14.65
  -8  -1  10   26.59   14.41
  -1   9  10   12.80   13.54
   8   1  11   36.79   22.21
   1  -9  11  110.43   28.88
  -1   9  11  101.77   32.49
  -8  -1  11   56.63   20.44
   8   1  12  -14.96   16.55
  -1   9  12   -1.52   10.19
   1  -9  12    0.06   11.40
  -8  -1  12  -11.28   13.92
  -1   9  13    3.65   13.81
   8   1  13   29.91   20.75
   1  -9  13   20.70   15.93
  -8  -1  13    6.08   15.15
   2  -9 -14   26.35   20.53
   2  -9 -13    5.08   11.54
   9  -7 -13  -12.12   16.47
  -9   7 -13   27.56   23.95
   9  -7 -12   10.82   15.41
   2  -9 -12    2.25   13.08
   2  -9 -11  131.78   28.55
  -7  -2 -11  135.03   30.34
  -9   7 -11   76.47   31.37
   9  -7 -11  116.84   31.90
   7   2 -11  128.37   24.89
  -9   7 -11   89.62   23.55
   9  -7 -10  122.11   31.54
   7   2 -10  111.80   23.57
  -7  -2 -10   93.95   25.54
   2  -9 -10  100.52   23.97
  -9   7 -10  137.83   28.62
   2  -9  -9    8.40   11.80
   9  -7  -9   -0.52   12.53
  -7  -2  -9    9.12   12.13
   7   2  -9    9.31    9.12
  -9   7  -9   17.49   12.70
   9  -7  -8  142.89   32.08
   2  -9  -8  114.66   25.15
  -7  -2  -8  105.95   26.84
   7   2  -8  135.75   23.96
  -9   7  -8  108.65   25.49
  -7  -2  -7   34.94   16.97
   9  -7  -7   32.98   17.18
   7   2  -7   16.91   11.40
   2  -9  -7   25.24   14.81
  -9   7  -7   28.86   16.83
   9  -7  -6  137.73   28.59
  -7  -2  -6   75.26   21.61
   7   2  -6   96.70   19.99
   2  -9  -6  105.75   22.38
  -9   7  -6   99.06   24.29
  -7  -2  -5   53.61   20.60
   9  -7  -5   32.02   14.27
   2  -9  -5   29.15   13.37
  -9   7  -5   45.06   18.30
  -7  -2  -4  364.73   45.22
   2  -9  -4  462.75   39.19
  -9   7  -4  450.54   48.35
  -7  -2  -4  419.95   15.96
   9  -7  -4  484.11   46.49
   2  -9  -3   28.46   11.95
  -7  -2  -3    9.06   13.85
  -7  -2  -3   24.93    5.33
  -9   7  -3   18.01   11.96
   9  -7  -2   92.19   19.42
  -7  -2  -2  137.42   29.44
   2  -9  -2   90.42   17.62
  -7  -2  -2   74.34   10.38
  -9   7  -2   85.82   22.02
   9  -7  -1  453.21   38.45
   2  -9  -1  452.53   36.75
  -9   7  -1  467.22   47.52
  -7  -2  -1  423.02   27.53
  -7  -2  -1  405.31   46.76
  -7  -2   0   93.26   22.87
   2  -9   0   99.72   18.22
  -2   9   0  116.57   21.68
  -7  -2   0   96.09   15.25
  -9   7   0  128.89   25.79
   9  -7   0  130.66   20.17
   9  -7   1  388.55   31.85
   7   2   1  381.01   23.58
  -2   9   1  357.40   29.39
   2  -9   1  350.65   33.62
  -9   7   1  364.08   41.47
  -7  -2   1  399.55   31.74
  -2   9   1  373.36   34.80
  -7  -2   1  347.14   42.12
  -7  -2   2   92.30   21.95
   9  -7   2   94.74   15.99
   7   2   2   92.30    9.37
  -2   9   2   76.31   15.23
   2  -9   2  117.58   21.27
  -7  -2   2   87.11   16.99
  -2   9   2   92.79   17.02
  -9   7   2   84.49   20.38
   9  -7   3   34.71    9.78
   2  -9   3   30.56   11.17
  -2   9   3   33.07   11.15
  -7  -2   3   18.55    9.10
  -7  -2   3   29.44   11.05
  -2   9   3   15.36    8.33
  -9   7   3   40.08   15.28
  -2   9   4  441.12   43.65
   9  -7   4  459.96   32.17
   2  -9   4  478.48   42.48
  -9   7   4  444.06   44.95
  -7  -2   4  484.16   42.29
  -7  -2   4  404.46   43.42
  -7  -2   5   19.69    9.17
   9  -7   5   24.60    8.68
   2  -9   5   23.42   12.18
  -7  -2   5   23.84   11.96
  -9   7   5   46.89   16.37
  -2   9   5   46.64   16.78
  -9   7   5   25.14    4.51
   9  -7   6  103.19   16.66
   2  -9   6  112.37   22.80
  -7  -2   6  107.16   23.44
  -7  -2   6  103.43   22.35
  -2   9   6  120.20   25.71
  -7  -2   7   47.56   14.94
   2  -9   7  105.54   23.36
   9  -7   7   66.93   14.16
  -7  -2   7   63.16   19.14
  -2   9   7   62.91   22.15
  -7  -2   8   99.93   20.38
   2  -9   8  121.74   25.69
   9  -7   8  123.81   19.49
  -2   9   8   93.73   27.12
  -7  -2   8  135.96   28.77
   2  -9   9   29.17   16.86
  -2   9   9   15.02   15.94
  -7  -2   9   22.15   14.10
   2  -9  10  115.05   29.11
  -2   9  10  146.94   35.48
   9  -7  10  118.91   28.98
  -7  -2  10  167.43   32.90
   7   2  10  123.42   33.21
   9  -7  11  143.70   31.19
   7   2  11  165.48   40.32
   2  -9  11  192.25   37.13
  -7  -2  11  126.59   30.63
   9  -7  12    6.28   10.81
   7   2  12    4.12   14.21
   2  -9  12  -17.94   14.77
  -7  -2  12   30.33   17.42
   7   2  13   16.41   19.89
   2  -9  13   -5.46   11.54
  -7  -2  13    2.26   12.65
   2  -9  14   10.01   14.55
   3  -9 -15  -47.23   22.80
   3  -9 -14  -11.73   16.57
   3  -9 -13    9.36   13.81
   9  -6 -13    5.30   13.77
  -9   6 -13   22.31   18.72
   9  -6 -12    0.84   13.77
   3  -9 -12   -7.67   13.35
   6   3 -12    9.18    9.42
   9  -6 -11   49.73   22.51
   3  -9 -11   87.62   24.48
   6   3 -11   64.06   20.43
  -6  -3 -11   91.34   24.66
  -9   6 -11   87.02   22.65
   9  -6 -10   60.68   25.56
   3  -9 -10   20.55   13.55
   6   3 -10   46.88   17.60
  -6  -3 -10    7.69   10.66
  -9   6 -10   39.68   17.27
  -6  -3  -9   28.35   15.14
   6   3  -9   78.02   19.87
   9  -6  -9   51.39   19.59
   3  -9  -9   56.58   19.30
  -9   6  -9   67.20   20.86
   9  -6  -8  113.69   27.92
   3  -9  -8   74.52   20.02
  -6  -3  -8   92.41   25.19
   6   3  -8  154.08   26.81
  -9   6  -8  103.83   24.78
   9  -6  -7    9.47   13.46
   3  -9  -7    5.99   12.91
  -6  -3  -7   24.96   13.76
   6   3  -7   12.41    9.60
  -9   6  -7   42.00   17.07
   9  -6  -6   40.92   16.89
   3  -9  -6   58.84   18.37
  -6  -3  -6   41.24   18.53
   6   3  -6   57.10   16.78
  -6  -3  -6   37.35    6.28
  -9   6  -6   38.46   17.34
   3  -9  -5  145.82   25.94
   9  -6  -5  122.69   25.47
  -6  -3  -5  114.87   27.74
  -6  -3  -5  106.40   10.45
   6   3  -5  108.61   20.62
  -9   6  -5  112.27   24.81
   9  -6  -4  267.18   33.80
   6   3  -4  241.61   29.37
  -6  -3  -4  228.59   36.12
   3  -9  -4  206.58   27.84
  -6  -3  -4  205.30   15.68
  -9   6  -4  171.33   29.62
   9  -6  -3  131.11   23.49
  -6  -3  -3  151.21   14.65
   3  -9  -3  113.95   20.92
  -6  -3  -3  152.37   30.89
  -9   6  -3  166.91   30.17
   3  -9  -2  641.47   43.65
  -9   6  -2  667.16   56.40
  -6  -3  -2  658.23   32.73
  -6  -3  -2  647.06   57.88
   9  -6  -2  670.11   47.61
   3  -9  -1  721.64   45.75
  -6  -3  -1  760.67   38.16
  -9   6  -1  811.53   61.60
  -6  -3  -1  731.61   61.71
   9  -6  -1  701.79   46.34
  -6  -3   0   29.76   16.24
   9  -6   0    4.37    8.67
   3  -9   0    8.98    8.42
  -6  -3   0   33.67   10.35
  -9   6   0   30.10   14.36
   9  -6   1  734.92   41.52
   6   3   1  754.07   31.91
   3  -9   1  713.80   46.58
   3  -9   1  790.12   48.82
  -9   6   1  747.32   57.73
  -6  -3   1  794.75   45.75
  -3   9   1  726.07   47.57
  -6  -3   1  752.35   61.29
  -3   9   2  639.51   41.32
   9  -6   2  669.92   37.64
   3  -9   2  656.26   45.69
  -9   6   2  717.70   56.21
  -6  -3   2  717.58   58.90
  -6  -3   2  650.99   43.64
   6   3   2  658.50   27.98
  -3   9   3  161.92   19.87
  -6  -3   3  127.69   24.95
   9  -6   3  133.12   17.15
   3  -9   3  142.93   22.70
  -6  -3   3  171.63   24.62
  -9   6   3  135.63   24.76
   6   3   3  124.64   12.07
  -9   6   4  173.21   15.68
  -6  -3   4  171.37   28.86
   3  -9   4  213.67   27.76
  -6  -3   4  172.94   26.02
   9  -6   4  188.72   18.67
  -9   6   4  184.32   27.99
   6   3   4  176.66   12.38
   3  -9   5  108.66   21.82
  -6  -3   5   80.89   19.99
  -6  -3   5  112.27   23.07
  -9   6   5   94.79   20.51
   9  -6   5   99.70   13.87
   3  -9   6   45.75   16.74
   9  -6   6   42.41   10.36
  -6  -3   6   57.98   18.79
  -6  -3   6   39.16   13.90
  -9   6   6   43.16   15.16
  -9   6   7   25.58   10.33
   3  -9   7   36.74   14.97
  -6  -3   7   26.92   11.67
   9  -6   7   20.46    7.69
  -6  -3   7   37.13   15.70
  -6  -3   8  101.24   19.78
   3  -9   8  127.11   26.03
   9  -6   8  131.33   17.96
  -6  -3   8  128.35   27.53
   6   3   9   61.55   23.68
   3  -9   9   22.01   13.14
  -6  -3   9   43.70   18.31
   6   3  10   41.57   24.49
  -6  -3  10   41.68   19.94
   3  -9  10   36.55   15.80
   3  -9  11   37.73   17.97
   6   3  11   25.05   19.07
  -6  -3  11   73.29   25.58
   9  -6  11   24.51   15.05
   6   3  12    0.08   14.87
   9  -6  12    1.67   11.03
   3  -9  12   23.31   17.58
  -6  -3  12   20.77   15.31
   9  -6  13   18.01   14.05
   3  -9  13    2.64   11.27
  -6  -3  13   31.87   18.20
   6   3  13   34.53   19.52
   3  -9  14   55.56   24.04
   4  -9 -14   17.61   13.80
   4  -9 -13   38.80   15.76
   5   4 -13   50.95   20.93
   9  -5 -13   -7.30   18.35
   9  -5 -12   44.46   23.26
   4  -9 -12    4.82   12.99
   5   4 -12   40.00   18.24
   5   4 -11   90.14   25.41
   9  -5 -11  111.56   33.57
  -5  -4 -11  152.47   31.69
   4  -9 -11  122.35   30.39
  -9   5 -11   88.67   23.35
   9  -5 -10   13.91   16.41
   4  -9 -10   21.60   14.65
  -5  -4 -10   55.16   22.28
  -9   5 -10   45.25   18.98
   5   4 -10   50.72   18.49
   9  -5  -9  162.98   33.80
   5   4  -9  128.08   27.03
  -5  -4  -9  239.33   39.31
   4  -9  -9  132.65   28.31
  -9   5  -9  140.77   29.11
   4  -9  -8   72.78   21.13
  -5  -4  -8   85.86   22.94
   5   4  -8  153.74   28.78
   9  -5  -8  149.44   32.50
  -9   5  -8  146.78   29.43
   5   4  -7   89.69   20.54
   9  -5  -7  155.44   30.72
  -5  -4  -7   99.76   11.06
   4  -9  -7  136.34   26.34
  -5  -4  -7  106.32   25.55
  -9   5  -7  133.05   27.77
   9  -5  -6  -20.31   17.23
  -5  -4  -6    7.71   12.44
   5   4  -6    2.14    8.38
  -5  -4  -6    0.63    3.08
   4  -9  -6   -4.24   11.40
  -9   5  -6  -20.56   12.18
  -9   5  -5  215.87   20.17
   9  -5  -5  262.59   36.01
  -5  -4  -5  233.40   36.95
   4  -9  -5  248.53   32.40
  -5  -4  -5  231.99   18.14
   5   4  -5  199.71   28.21
  -9   5  -5  253.93   35.62
   4  -9  -4  632.69   47.92
  -9   5  -4  455.60   47.39
  -5  -4  -4  499.75   26.85
   5   4  -4  521.20   43.46
   4  -9  -4  471.90   35.06
   9  -5  -4  554.30   48.14
  -5  -4  -4  583.29   56.88
  -9   5  -4  519.77   32.13
   9  -5  -3  169.09   26.02
  -5  -4  -3  132.54   27.00
  -5  -4  -3  177.27   16.99
   5   4  -3  167.95   24.97
  -9   5  -3  192.08   30.90
   4  -9  -3  175.66   25.41
  -9   5  -3  168.68   19.25
  -9   5  -2   28.33    8.26
   9  -5  -2   23.11   11.11
   4  -9  -2   30.16   11.33
  -5  -4  -2   39.57   15.54
  -5  -4  -2   20.82    7.30
  -9   5  -2   20.46   10.61
   4  -9  -1 1051.89   55.60
  -9   5  -1 1060.63   69.31
   4  -9  -1 1111.51   53.69
  -5  -4  -1 1145.27   48.50
  -5  -4  -1 1232.02   78.97
   9  -5  -1 1071.72   55.37
   9  -5   0   91.46   15.79
  -5  -4   0  116.40   25.76
   4  -9   0   81.19   16.32
  -5  -4   0   98.85   15.78
  -9   5   0   76.01   19.63
   4  -9   0   86.02   13.15
   5   4   1 1070.27   40.94
   4  -9   1  983.62   53.69
  -5  -4   1 1157.95   55.24
   9  -5   1 1134.78   48.77
   4  -9   1 1068.82   36.85
  -9   5   1 1147.10   70.44
  -5  -4   1 1192.00   76.56
  -5  -4   2   51.30   17.63
   4  -9   2   72.02   16.69
  -5  -4   2   55.31   13.29
  -4   9   2   53.17   12.63
   5   4   2   51.04    9.24
  -9   5   2   39.88   13.73
   9  -5   2   43.22   10.40
   5   4   3  204.23   18.28
  -5  -4   3  214.38   32.46
   9  -5   3  173.34   16.99
   4  -9   3  195.20   25.54
  -4   9   3  186.60   20.47
  -5  -4   3  168.39   24.34
  -9   5   3  179.65   27.96
  -9   5   4  468.85   28.85
   9  -5   4  507.39   25.42
  -9   5   4  503.63   45.48
   4  -9   4  513.69   41.72
  -5  -4   4  487.98   42.67
  -5  -4   4  525.43   49.79
   5   4   4  447.99   26.96
  -5  -4   5  223.25   32.51
   4  -9   5  260.56   31.43
   9  -5   5  238.43   17.71
  -5  -4   5  237.33   32.10
  -9   5   5  176.23   26.47
   5   4   5  223.83   18.94
  -5  -4   6    2.68    7.69
   4  -9   6    0.19    9.11
   9  -5   6    5.79    3.86
  -5  -4   6    0.64   10.67
  -9   5   6    5.68    7.15
   4  -9   7  155.63   26.52
  -5  -4   7  122.66   22.97
  -5  -4   7  144.06   27.94
   9  -5   7  133.17   14.38
  -9   5   7  170.56   25.55
  -9   5   8  113.42   20.34
   4  -9   8  159.24   29.28
  -5  -4   8  168.40   26.14
  -5  -4   8  192.55   32.76
   5   4   8  184.17   37.54
   5   4   9  159.49   36.34
   4  -9   9  132.61   27.20
  -5  -4   9  160.55   31.94
   4  -9  10   80.00   23.56
   5   4  10   22.55   16.88
  -5  -4  10   67.06   22.83
   5   4  11   54.41   23.88
   9  -5  11   88.18   27.06
   4  -9  11   79.80   24.58
  -5  -4  11   78.14   24.96
   9  -5  12   43.87   21.95
   5   4  12   30.48   19.19
   4  -9  12   62.72   23.15
  -5  -4  12   58.07   20.23
   9  -5  13   19.94   18.57
   5   4  13   51.89   25.91
   4  -9  13   32.22   19.54
  -5  -4  13   20.25   15.12
   4  -9  14   67.58   26.06
   9  -5  14   57.32   26.80
   9  -5  15  -22.59   18.13
   4  -9  15   21.72   16.29
   4   5 -14    6.95   10.25
   5  -9 -14   32.20   16.83
   9  -4 -13    4.97   12.23
   5  -9 -13   36.12   19.48
   4   5 -13    4.10   10.48
   4   5 -12   15.02   12.99
   5  -9 -12   14.08   15.29
   9  -4 -12   -4.20   12.30
  -5   9 -12  -15.41   18.67
   9  -4 -11  337.73   54.63
   4   5 -11  258.61   40.89
  -5   9 -11  387.45   59.76
  -4  -5 -11  283.47   42.13
   5  -9 -11  289.22   44.36
  -9   4 -11  270.53   40.75
   4   5 -10   -3.76   10.94
   5  -9 -10   30.07   17.12
  -4  -5 -10   33.56   16.89
  -5   9 -10   33.56   23.61
  -9   4 -10   12.39    9.24
   9  -4 -10   50.82   23.30
   5  -9  -9  -12.72   17.61
   9  -4  -9  -21.15   16.08
   4   5  -9  -13.08   14.76
  -4  -5  -9   -7.90   10.79
  -5   9  -9    4.89   14.36
  -9   4  -9   -7.10   10.04
   5  -9  -8    0.28   10.59
  -5   9  -8   15.50   12.34
  -4  -5  -8    6.49    5.78
  -4  -5  -8    1.11    9.25
   9  -4  -8  -13.16   14.78
   4   5  -8   -1.51    9.99
  -9   4  -8   -1.06    9.58
   9  -4  -7   88.42   25.84
   5  -9  -7   86.39   21.61
  -4  -5  -7  129.93   15.74
  -4  -5  -7  102.04   24.57
   4   5  -7  137.81   27.04
  -9   4  -7  131.93   27.30
  -5   9  -7  100.26   26.34
   9  -4  -6  151.87   29.62
  -4  -5  -6  130.21   29.81
   5  -9  -6   93.54   22.44
  -5   9  -6  152.66   32.80
   4   5  -6  131.77   24.74
  -4  -5  -6  115.23   13.86
  -9   4  -6  162.13   29.82
  -4  -5  -5  275.78   40.27
  -4  -5  -5  286.05   20.49
   4   5  -5  262.83   33.78
  -5   9  -5  278.89   39.77
   5  -9  -5  271.74   22.17
  -9   4  -5  240.64   35.33
   9  -4  -5  325.57   40.45
  -9   4  -5  296.63   20.19
   5  -9  -5  303.02   36.09
   5  -9  -4  515.79   44.24
   4   5  -4  454.55   42.05
  -4  -5  -4  532.16   30.71
   5  -9  -4  478.05   32.91
  -9   4  -4  523.45   51.16
  -5   9  -4  468.24   49.17
  -4  -5  -4  473.46   50.72
   9  -4  -4  482.68   45.71
  -9   4  -4  490.35   27.11
  -9   4  -3   13.24    5.25
   9  -4  -3    7.57    7.96
  -4  -5  -3    8.19   12.26
   4   5  -3   14.25    9.97
   5  -9  -3   20.41   13.84
  -4  -5  -3   17.70    7.34
  -9   4  -3    0.19   10.72
   5  -9  -3    8.70    5.79
  -4  -5  -2   13.17    8.65
   4   5  -2   33.31   12.98
  -4  -5  -2   12.05    6.02
   5  -9  -2   21.30   13.23
  -9   4  -2   16.25   10.04
  -9   4  -2   15.82    6.46
   9  -4  -2   22.89   10.75
  -9   4  -1  656.90   55.19
   4   5  -1  769.05   50.72
  -4  -5  -1  654.78   37.94
   5  -9  -1  607.58   41.45
   5  -9  -1  677.11   45.15
  -9   4  -1  649.20   38.87
  -4  -5  -1  687.79   59.13
   9  -4  -1  649.96   42.16
  -9   4   0  766.70   58.90
   5  -9   0  759.11   46.94
  -4  -5   0  745.38   42.68
   5  -9   0  694.27   39.71
   9  -4   0  678.77   37.38
  -4  -5   0  707.84   59.78
   9  -4   0  736.45   41.06
   9  -4   1  681.32   36.24
   5  -9   1  671.63   44.12
  -4  -5   1  717.20   44.04
   5  -9   1  578.21   31.49
   9  -4   1  638.26   32.57
  -9   4   1  606.89   52.39
  -4  -5   1  705.27   57.78
  -4  -5   2   37.33   16.54
   4   5   2   30.02    8.46
   9  -4   2   33.85    8.72
   5  -9   2   34.52   11.29
   5  -9   2   18.96   11.39
  -4  -5   2   17.17    8.62
  -9   4   2   15.05   10.86
   9  -4   2   30.69    6.62
   5  -9   2   24.29    5.64
  -4  -5   3    6.16    8.31
  -5   9   3   11.37    5.75
   9  -4   3   11.37    4.24
   5  -9   3   13.03   10.11
  -4  -5   3   32.96   14.97
   4   5   3    0.07    4.65
  -9   4   3    3.36    8.68
   5  -9   3    9.15    2.79
   9  -4   3    9.20    3.36
  -5   9   4  498.91   28.12
  -9   4   4  449.54   42.86
   5  -9   4  500.21   40.51
   9  -4   4  487.95   18.96
  -4  -5   4  427.84   40.48
  -4  -5   4  454.55   45.84
   4   5   4  507.69   33.28
   5  -9   5  270.91   31.54
   9  -4   5  244.76   12.06
  -4  -5   5  272.00   33.86
  -9   4   5  205.11   28.54
  -4  -5   5  330.98   39.74
   4   5   5  263.38   24.79
  -4  -5   6  121.25   24.83
   5  -9   6  135.92   11.78
   5  -9   6  116.34   21.93
   9  -4   6  128.92    8.39
  -4  -5   6  127.19   24.62
  -9   4   6  109.09   20.73
  -4  -5   7   73.07   18.55
   5  -9   7  101.49   21.38
  -4  -5   7   72.41   21.29
  -9   4   7   83.99   18.27
   4   5   7  135.27   30.46
   4   5   8   29.22   19.15
  -4  -5   8    7.68    7.72
   5  -9   8   24.30   13.55
  -4  -5   8    3.44   10.22
  -9   4   8    9.23    7.04
   5  -9   9   -7.68   11.78
   4   5   9    4.13    9.70
  -4  -5   9    0.41   11.24
   4   5  10   30.63   18.64
   5  -9  10   20.64   13.46
  -4  -5  10   28.89   18.02
   9  -4  11  250.93   45.87
   5  -9  11  248.38   40.71
  -4  -5  11  303.81   45.15
   4   5  11  208.58   44.35
   9  -4  12   24.34   16.93
   5  -9  12   46.94   20.11
   4   5  12   22.21   21.43
  -4  -5  12   44.48   20.27
   4   5  13   -5.30   15.33
   9  -4  13    2.52    9.66
   5  -9  13    3.83   11.43
  -4  -5  13   16.60   15.15
   9  -4  14    7.11   12.98
   5  -9  14    8.43   12.72
   9  -4  15    7.71   13.71
   6  -9 -14    6.83   12.77
   6  -9 -13   95.31   30.34
   9  -3 -13   -2.65   13.56
  -6   9 -13   62.00   28.24
   9  -3 -12    8.14   15.10
   6  -9 -12   52.70   25.30
  -6   9 -12   31.98   21.96
   9  -3 -11   87.07   29.12
   6  -9 -11  137.02   31.96
  -6   9 -11  104.22   34.42
  -3  -6 -11   67.10   19.99
  -9   3 -11   48.66   19.30
   6  -9 -10   35.96   19.76
   9  -3 -10   -0.38   15.14
  -6   9 -10    4.88   14.75
  -9   3 -10   18.03   13.27
  -3  -6 -10   13.65    9.33
   9  -3  -9  186.95   38.17
  -6   9  -9  122.15   32.60
   6  -9  -9  152.02   30.33
  -3  -6  -9  120.77   28.17
  -3  -6  -9  144.65   20.49
  -9   3  -9  143.31   29.94
   9  -3  -8  139.02   31.78
  -6   9  -8  139.09   34.34
  -3  -6  -8  117.27   28.46
   6  -9  -8  116.92   27.44
  -9   3  -8  168.32   31.85
  -3  -6  -8  147.28   20.06
   9  -3  -7  119.25   30.14
   6  -9  -7  116.93   25.81
   3   6  -7  102.34   24.09
  -6   9  -7   36.78   17.64
  -3  -6  -7   87.95   14.84
  -3  -6  -7   99.71   27.58
  -9   3  -7   59.44   19.61
  -3  -6  -6  135.13   29.68
   6  -9  -6   68.17   21.05
   3   6  -6  161.01   29.26
  -3  -6  -6  112.32   15.91
  -9   3  -6  109.51   26.44
  -6   9  -6  111.79   27.56
   9  -3  -6  122.37   28.42
   3   6  -5  387.56   41.43
  -6   9  -5  369.11   46.64
  -3  -6  -5  354.37   26.46
  -3  -6  -5  299.90   42.10
  -9   3  -5  318.92   42.17
   6  -9  -5  338.23   39.78
   9  -3  -5  366.86   43.52
   9  -3  -4   98.18   22.54
  -3  -6  -4   74.64   20.76
   6  -9  -4   46.19   16.54
  -3  -6  -4   47.30   10.26
   3   6  -4   81.51   19.30
  -9   3  -4   35.93   16.47
  -6   9  -4   79.01   22.64
   9  -3  -3   77.81   18.33
  -6   9  -3   63.70   19.78
   6  -9  -3   63.48   19.95
   3   6  -3   66.48   18.56
  -3  -6  -3   58.02   12.17
  -9   3  -3   41.45   17.96
  -3  -6  -3   40.24   17.67
   6  -9  -2  377.72   36.69
  -9   3  -2  378.81   43.88
  -3  -6  -2  379.61   29.08
   3   6  -2  423.31   39.36
  -6   9  -2  344.92   39.21
   9  -3  -2  336.56   33.71
   6  -9  -1  229.86   28.41
  -6   9  -1  180.29   27.32
  -3  -6  -1  231.49   23.90
   3   6  -1  216.95   27.62
  -9   3  -1  178.82   31.09
   9  -3  -1  219.23   24.48
   6  -9   0 1202.96   59.57
  -9   3   0 1252.85   76.37
   3   6   0 1209.08   63.21
  -3  -6   0 1238.90   56.58
   9  -3   0 1181.25   47.56
   9  -3   0 1264.83   52.19
  -3  -6   1  259.17   27.41
   9  -3   1  248.19   19.20
  -9   3   1  209.71   31.78
   6  -9   1  261.59   27.84
   9  -3   1  257.08   21.10
   9  -3   2  417.36   22.56
  -9   3   2  314.93   37.44
   6  -9   2  401.33   35.10
  -3  -6   2  371.95   34.60
   9  -3   2  377.33   19.93
   9  -3   3   51.33    6.69
   9  -3   3   45.38    4.61
   6  -9   3   48.40   14.22
   9  -3   3   43.94    4.84
  -3  -6   3   42.49   14.89
  -9   3   3   58.01   16.54
  -6   9   4   83.97   10.68
   6  -9   4   81.72   16.97
  -3  -6   4   77.71   18.72
  -9   3   4  104.44   22.54
  -9   3   5  375.65   39.43
   6  -9   5  368.28   36.22
  -3  -6   5  305.68   36.19
   3   6   5  310.75   40.63
   3   6   6  120.54   27.93
   6  -9   6  148.13   24.14
  -3  -6   6  105.15   22.91
  -9   3   6   98.68   21.00
   6  -9   6  127.19   15.92
  -3  -6   6  113.25   24.13
  -3  -6   7   87.58   20.55
   3   6   7   94.19   25.95
   6  -9   7   76.48   19.27
  -3  -6   7   78.33   21.42
  -9   3   7   68.71   18.41
   6  -9   7   74.87   13.58
  -3  -6   8  159.16   27.50
   3   6   8  136.41   32.35
   6  -9   8  161.71   28.14
  -3  -6   8  123.12   26.49
  -9   3   8  137.69   21.90
   3   6   9  100.22   29.07
   6  -9   9   99.42   23.41
  -3  -6   9  120.43   27.93
   6  -9  10   -4.56   11.04
  -3  -6  10   32.15   17.57
   3   6  10   29.91   19.31
   9  -3  11  111.18   31.24
   3   6  11   85.44   30.93
   6  -9  11  112.93   27.57
  -3  -6  11   76.83   25.28
   3   6  12   -2.77   10.85
   9  -3  12   16.43   17.66
   6  -9  12    5.09   11.18
  -3  -6  12   -0.17   15.33
   3   6  13    7.18   16.33
   9  -3  13   33.17   21.97
   6  -9  13   34.68   17.38
  -3  -6  13   72.08   25.47
   9  -3  14   -0.84    8.98
   9  -2 -13    0.09   19.47
  -7   9 -13   47.79   28.02
   7  -9 -13   21.95   18.75
   9  -2 -12    5.10   15.84
  -7   9 -12    4.25   14.45
   7  -9 -12  -10.84   14.57
   9  -2 -11   80.04   29.64
  -7   9 -11   92.63   33.89
  -2  -7 -11   50.19   18.68
   7  -9 -11   53.09   23.26
  -9   2 -11   29.24   16.70
   7  -9 -10   66.33   23.39
  -2  -7 -10   43.21   19.10
  -2  -7 -10   67.79   16.62
  -7   9 -10   85.04   31.26
  -9   2 -10   55.66   19.57
   9  -2 -10   67.54   24.24
   7  -9  -9   72.94   23.83
  -2  -7  -9   45.79   19.06
   9  -2  -9   65.12   23.59
  -9   2  -9   29.35   14.71
  -2  -7  -9   54.27   14.69
  -7   9  -9   43.34   23.98
  -2  -7  -8   38.63   17.63
   7  -9  -8   64.12   23.01
  -2  -7  -8   23.83   10.46
  -9   2  -8   28.88   17.43
   9  -2  -8   48.28   19.75
  -7   9  -8   58.20   22.55
  -2  -7  -7   58.93   22.49
  -2  -7  -7   63.48   14.40
  -9   2  -7   37.88   18.15
   7  -9  -7   41.93   18.44
  -7   9  -7   41.43   20.80
   9  -2  -7   41.21   18.40
  -2  -7  -6   52.86   18.63
   7  -9  -6   91.67   21.65
  -2  -7  -6  112.31   17.51
  -9   2  -6  146.63   29.87
  -7   9  -6  139.73   31.12
   9  -2  -6  129.43   28.46
  -2  -7  -5  211.63   22.71
   7  -9  -5  184.30   29.88
   2   7  -5  164.99   29.34
   9  -2  -5  174.88   29.54
  -9   2  -5  146.78   30.90
  -7   9  -5  243.20   38.72
   7  -9  -4  737.91   55.48
   2   7  -4  896.41   63.47
  -2  -7  -4  784.11   42.50
  -7   9  -4  756.18   64.50
  -9   2  -4  798.71   66.13
   9  -2  -4  913.97   64.01
   9  -2  -3  234.90   31.59
  -2  -7  -3  214.63   22.22
   7  -9  -3  161.28   27.06
   2   7  -3  152.45   26.04
  -9   2  -3  211.77   33.66
  -7   9  -3  159.62   28.76
  -9   2  -2  352.61   43.62
   2   7  -2  320.09   35.92
  -2  -7  -2  366.77   30.71
   7  -9  -2  453.29   40.09
  -7   9  -2  320.80   38.42
   9  -2  -2  421.51   38.51
   9  -2  -1  214.22   24.42
  -7   9  -1  156.70   25.70
   7  -9  -1  221.92   27.44
   2   7  -1  182.52   26.87
  -2  -7  -1  170.74   21.91
  -9   2  -1  173.79   30.80
  -9   2   0  354.71   42.75
   7  -9   0  324.90   32.09
   2   7   0  325.72   33.82
  -2  -7   0  293.63   28.96
   9  -2   0  274.85   22.68
  -7   9   0  289.84   32.41
   9  -2   0  272.89   24.45
  -2  -7   1  249.71   27.94
   9  -2   1  185.76   15.90
  -9   2   1  192.98   30.74
   7  -9   1  209.89   25.35
   9  -2   1  190.48   17.80
   9  -2   2  413.29   20.08
  -9   2   2  394.23   43.16
   7  -9   2  454.87   36.97
  -2  -7   2  427.73   37.53
   9  -2   2  383.94   17.27
   7  -9   3  207.86   25.48
  -9   2   3  252.46   34.56
  -2  -7   3  200.24   27.60
  -7   9   4  805.24   30.47
  -9   2   4  770.57   58.22
  -2  -7   4  790.62   55.08
   7  -9   4  830.92   51.14
   2   7   4  710.22   58.36
   2   7   5  118.19   25.97
   7  -9   5  164.85   24.06
  -9   2   5  159.88   26.57
  -2  -7   5  170.22   26.88
   7  -9   6  111.75   20.96
  -9   2   6  120.28   23.42
  -2  -7   6   89.59   21.36
   2   7   6  103.18   25.70
  -9   2   6   89.82   21.21
   2   7   7   49.56   19.36
   7  -9   7   39.42   10.98
   7  -9   7   36.16   12.60
  -9   2   7   48.81   14.57
  -2  -7   7   47.26   17.80
  -9   2   7   72.55   18.96
   2   7   8   70.80   26.71
   7  -9   8   18.21    8.85
   7  -9   8   47.81   16.07
  -2  -7   8    9.36    9.67
  -9   2   8   32.94   11.57
   7  -9   9   76.24   20.32
  -2  -7   9   40.98   18.51
   2   7   9   52.27   25.53
  -2  -7   9   50.87   15.49
   2   7  10   55.62   24.91
   7  -9  10   71.03   21.01
  -2  -7  10   27.22   16.04
   2   7  11   67.67   28.97
   7  -9  11  122.47   27.82
  -2  -7  11   72.60   24.01
   9  -2  11   90.78   30.19
   2   7  12   -0.16   13.55
   9  -2  12  -13.01   16.51
   7  -9  12  -12.43   11.71
  -2  -7  12   13.72   15.05
   2   7  13   17.25   17.89
   9  -2  13   22.93   19.40
  -2  -7  13    7.56   13.25
   9  -2  14    0.70    9.50
  -8   9 -13   12.42   17.94
   8  -9 -13   13.30   17.18
   9  -1 -13    3.09   14.30
   8  -9 -12   24.24   19.44
  -8   9 -12   40.16   25.23
   9  -1 -12   67.47   30.37
   8  -9 -11   54.52   21.61
  -9   1 -11   76.42   25.08
  -8   9 -11   46.21   25.61
   9  -1 -11   38.01   19.45
  -1  -8 -10   16.32   12.92
   8  -9 -10   22.79   13.81
  -1  -8 -10    4.70    9.57
  -9   1 -10   13.81   11.68
  -8   9 -10   10.86   12.33
   9  -1 -10    2.70   15.72
  -1  -8  -9   38.60   19.20
   8  -9  -9   78.59   24.34
  -1  -8  -9   41.91   15.03
  -9   1  -9   32.28   17.14
  -8   9  -9   56.54   23.56
   9  -1  -9   70.94   23.29
  -1  -8  -8  271.27   30.86
   8  -9  -8  363.75   46.96
  -1  -8  -8  260.50   42.08
  -9   1  -8  213.08   37.83
  -8   9  -8  281.77   48.69
   9  -1  -8  282.38   44.38
   8  -9  -7   86.16   24.33
  -1  -8  -7   88.36   17.92
  -9   1  -7   49.16   21.44
  -8   9  -7   71.72   26.80
   9  -1  -7   41.52   18.15
  -1  -8  -6   44.62   13.64
   8  -9  -6    8.94   15.76
  -9   1  -6   10.96   10.51
   9  -1  -6   28.59   13.43
  -8   9  -6   20.91   16.20
   8  -9  -5   63.44   20.34
  -9   1  -5   72.03   22.52
  -1  -8  -5   87.64   16.54
  -8   9  -5   69.69   23.28
   9  -1  -5  115.01   24.68
   8  -9  -4  789.32   58.56
  -9   1  -4  866.94   71.46
  -1  -8  -4  906.77   48.98
   9  -1  -4  824.19   61.18
  -8   9  -4  835.05   69.23
   1   8  -4  878.94   64.93
   8  -9  -3  120.69   24.33
   1   8  -3  114.65   23.32
  -1  -8  -3   99.30   16.83
  -9   1  -3  146.14   31.08
  -8   9  -3  104.57   24.44
   9  -1  -3  102.73   20.89
   1   8  -2  215.99   30.62
   8  -9  -2  257.55   31.79
  -1  -8  -2  285.45   28.87
  -9   1  -2  213.60   36.39
  -8   9  -2  281.96   36.30
   9  -1  -2  278.67   31.73
   9  -1  -1   66.88   15.13
   8  -9  -1   97.53   20.38
   1   8  -1   93.32   19.60
  -9   1  -1   91.97   25.99
  -1  -8  -1   92.96   17.94
  -8   9  -1   76.04   18.41
  -8   9   0  130.02   22.20
   8  -9   0  155.44   23.17
   1   8   0  136.13   23.33
   9  -1   0  142.24   16.23
  -9   1   0  205.69   35.25
  -1  -8   0  135.09   20.80
   9  -1   0  177.95   20.52
   1   8   1   99.54   18.13
   8  -9   1  110.99   19.43
  -8   9   1  114.29   19.67
   9  -1   1   88.56   11.98
   9  -1   1  100.48   11.40
  -9   1   1   88.03   23.25
   1   8   1  101.10   19.95
  -1  -8   1   96.56   18.48
   9  -1   2  314.97   15.84
   9  -1   2  307.08   14.21
  -9   1   2  254.68   36.80
  -1  -8   2  241.90   29.31
   1   8   2  289.98   32.89
   8  -9   2  338.12   32.50
  -8   9   2  307.52   28.96
  -9   1   2  291.79   27.56
   8  -9   3  102.32   18.96
   8  -9   3  100.05   18.15
  -9   1   3  120.52   24.93
  -1  -8   3  115.24   22.49
  -9   1   3  101.19   18.39
   1   8   3   81.18   19.13
  -9   1   4  742.76   59.51
   8  -9   4  886.47   52.25
  -1  -8   4  753.87   54.79
   1   8   4  850.50   64.93
  -9   1   4  873.67   54.54
   1   8   5   86.99   22.80
   8  -9   5  108.81   19.57
  -9   1   5   81.63   20.70
  -1  -8   5   79.64   19.96
  -9   1   5   89.59   19.85
   8  -9   6   24.74   11.30
  -9   1   6   37.76   14.06
  -1  -8   6   14.72   11.43
  -9   1   6   37.42   14.01
   8  -9   7   73.71   17.37
  -9   1   7   57.59   16.35
  -1  -8   7  110.71   24.55
   1   8   7  109.88   28.67
  -9   1   7  110.05   24.79
  -9   1   8  282.02   33.21
   1   8   8  215.70   41.73
   8  -9   8  251.82   33.68
  -1  -8   8  264.84   38.85
   8  -9   8  295.49   34.34
  -9   1   8  278.97   38.34
   1   8   9   27.77   19.43
   8  -9   9   70.75   19.20
  -1  -8   9   59.10   19.34
  -9   1   9   75.59   21.44
   1   8  10   -0.92   10.99
   8  -9  10    5.29    7.59
  -1  -8  10   16.76   14.88
  -9   1  10   17.02   13.19
   1   8  11   45.95   22.31
   8  -9  11   39.62   15.48
  -1  -8  11   31.13   16.25
  -9   1  11   84.34   26.60
   9  -1  11   55.12   24.31
   1   8  12   23.95   21.61
  -1  -8  12   49.24   22.21
   9  -1  12   24.51   19.92
  -1  -8  13   38.61   21.76
   9  -1  13    3.92   12.86
   1   8  13  -23.11   20.97
   9  -9 -12   16.27   14.42
  -9   9 -12   18.95   20.26
   9   0 -12   20.66   21.82
   0  -9 -11    5.94   12.67
   9  -9 -11   35.25   18.26
  -9   0 -11    8.85   12.36
  -9   9 -11   46.66   25.87
   9   0 -11   42.56   22.10
   0  -9 -10   20.32   12.96
   0  -9 -10   -9.08   10.29
   9  -9 -10    7.47   11.68
  -9   0 -10  -12.34   13.27
  -9   9 -10  -30.84   23.03
   0  -9  -9   46.23   15.03
   9  -9  -9   80.57   24.16
  -9   0  -9   55.56   19.43
  -9   9  -9   30.50   20.52
   0  -9  -9   80.97   23.20
  -9   0  -8  113.14   29.50
   0  -9  -8  124.00   23.32
   9  -9  -8  154.93   32.85
  -9   9  -8  122.76   33.36
   9  -9  -7  102.89   26.66
   0  -9  -7  108.39   21.62
  -9   0  -7  162.29   34.96
  -9   9  -7  107.16   30.59
   9  -9  -6  108.29   26.53
   0  -9  -6   61.03   15.82
  -9   0  -6   56.45   20.41
  -9   9  -6   33.64   16.37
  -9   9  -6   58.37   23.00
  -9   9  -5   87.79   24.67
   9  -9  -5   80.95   21.18
  -9   0  -5   37.02   18.02
   0  -9  -5  120.67   21.16
  -9   9  -5   69.07   24.16
  -9   9  -4   16.38   11.36
   9  -9  -4   26.27   16.71
   0  -9  -4   20.97   11.06
  -9   0  -4   35.16   16.22
  -9   9  -4   32.91   17.50
  -9   9  -3  179.25   31.75
   0   9  -3  226.93   33.73
   0  -9  -3  196.81   24.72
   9  -9  -3  213.43   30.97
  -9   0  -3  145.89   31.70
   0   9  -3  155.93   10.44
  -9   9  -3  188.08   33.37
  -9   0  -2  462.62   54.70
  -9   9  -2  412.97   47.88
   9  -9  -2  424.29   41.68
   0   9  -2  385.94   42.06
   0  -9  -2  414.37   35.38
   0   9  -2  356.97   21.96
  -9   9  -2  455.70   48.81
  -9   0  -1  401.65   48.51
  -9   9  -1  247.52   36.69
   9  -9  -1  259.71   31.31
   0   9  -1  286.50   34.66
   0  -9  -1  309.83   32.08
   0   9  -1  270.80   23.20
  -9   9  -1  359.05   40.18
   9   0  -1  389.78   36.07
   9   0   0  116.63   17.35
   0  -9   0   88.93   18.50
  -9   9   0   91.79   23.22
   0   9   0  120.78   17.77
   9  -9   0   98.50   19.25
   0   9   0  106.65   21.19
  -9   0   0   92.86   24.55
   9   0   0   91.97   13.10
  -9   9   0  112.48   21.23
  -9   0   0   81.58   12.80
  -9   0   1  378.03   46.90
   0   9   1  277.35   32.02
   9  -9   1  356.38   34.14
   0  -9   1  276.67   31.48
   9   0   1  357.33   21.57
   0   9   1  323.85   31.92
  -9   9   1  284.90   31.72
  -9   0   1  355.88   29.05
   9   0   1  329.14   23.57
  -9   0   2  456.33   49.88
   0   9   2  330.28   34.35
   0  -9   2  382.72   37.98
   9  -9   2  409.29   36.34
   0   9   2  413.96   39.02
  -9   9   2  393.37   33.97
  -9   0   2  405.33   34.59
   9   0   2  356.00   16.44
   9  -9   3  190.36   24.76
  -9   0   3  186.77   31.76
   0  -9   3  219.40   30.10
  -9   9   3  177.59   20.27
   0   9   3  187.66   28.80
  -9   0   3  179.19   24.76
  -9   0   4   35.62   15.40
   0  -9   4   32.76   13.48
   9  -9   4   74.47   16.24
   0   9   4   39.25   15.07
  -9   0   4   33.53   13.45
  -9   0   5   80.30   21.43
   9  -9   5   73.51   16.35
   0  -9   5   85.75   20.79
   0   9   5   73.41   22.67
  -9   0   5   91.04   20.38
   0   9   6   63.52   22.78
  -9   0   6   50.22   16.85
   9  -9   6   81.86   18.14
   0  -9   6   56.17   18.71
  -9   0   6   48.70   17.54
   0   9   7  136.65   33.55
  -9   0   7  129.56   24.63
   9  -9   7  123.58   21.76
   0  -9   7  105.08   24.71
  -9   0   7   86.44   23.80
   0   9   8   96.43   28.73
  -9   0   8  111.74   22.96
   9  -9   8  101.13   20.75
   0  -9   8  112.65   25.68
  -9   0   8  130.20   26.73
   0   9   9   98.19   31.83
   9  -9   9   42.35   14.91
   0  -9   9   55.61   20.17
  -9   0   9   39.20   19.18
   0   9  10   14.36   17.25
   0  -9  10    4.74   11.18
  -9   0  10    2.19   11.92
   9   0  11   27.03   17.93
   0  -9  11   13.12   16.07
  -9   0  11    2.05    9.63
   0   9  11   11.43   16.33
   9   0  12   -8.54   14.38
   0  -9  12    9.24   14.27
   0   9  12   17.94   17.25
  -9   0  12   -8.35   13.04
   0  -9  13   50.81   24.75
   0   9  13   31.46   23.78
   9   0  13   40.41   27.43
   1 -10 -12   31.85   15.37
 -10   9 -12   -0.56   17.48
  10  -9 -11   25.88   21.92
   1 -10 -11   29.46   16.23
  -9  -1 -11   27.49   17.36
 -10   9 -11    9.82   19.49
   1 -10 -10    5.59   11.85
  10  -9 -10  -15.93   15.57
 -10   9 -10  -18.97   24.38
   1 -10 -10   14.79   13.05
 -10   9  -9   24.64   17.27
  10  -9  -9   27.03   19.18
   1 -10  -9   15.36   12.70
  -9  -1  -9   -4.00   10.92
 -10   9  -9   19.66   15.13
 -10   9  -8   81.84   24.89
  10  -9  -8  139.97   32.28
   1 -10  -8  128.21   24.09
  -9  -1  -8  123.86   31.17
 -10   9  -8  144.56   36.27
  10  -9  -7  135.37   30.21
   1 -10  -7  164.07   26.61
  -9  -1  -7   99.74   27.48
 -10   9  -7   51.37   23.55
 -10   9  -7   56.20   20.77
  -9  -1  -6   -2.15   11.70
  10  -9  -6    3.63   13.94
 -10   9  -6  -12.46   14.08
   1 -10  -6   -1.45    7.72
  10  -9  -5   83.22   23.22
   1 -10  -5  151.71   24.75
  -9  -1  -5  113.00   28.77
 -10   9  -5  131.22   30.58
   1 -10  -4  437.68   39.40
 -10   9  -4  465.47   53.44
  -9  -1  -4  460.22   55.27
  10  -9  -4  410.05   44.86
  10  -9  -3    3.50   13.22
  -9  -1  -3   56.30   21.64
   1 -10  -3   22.32   11.52
 -10   9  -3   45.20   19.10
   1 -10  -2  312.29   32.86
  -1  10  -2  263.42   36.94
  -9  -1  -2  271.71   42.39
  -9  -1  -2  259.85   17.30
  10  -9  -2  257.80   33.53
 -10   9  -2  297.26   42.17
  -1  10  -1   48.98   16.32
  -9  -1  -1    4.57   10.42
  10  -9  -1   64.46   19.07
   1 -10  -1   70.78   18.64
  -1  10  -1   54.75    9.46
  -9  -1  -1   46.09    8.94
 -10   9  -1   75.04   22.79
  -1  10   0  653.44   52.14
  -9  -1   0  665.24   64.07
   1 -10   0  731.08   51.31
  -1  10   0  588.08   36.82
 -10   9   0  680.56   62.08
  -9  -1   0  571.50   35.32
  10  -9   0  645.80   47.12
 -10   9   1   48.85   18.26
  -1  10   1   28.58    9.98
  10  -9   1   23.28   12.75
  -9  -1   1   22.18   13.99
  -1  10   1   54.21   15.84
   9   1   1   29.75    6.93
   1 -10   1   18.86   13.71
 -10   9   1   34.78   12.51
  -9  -1   1   35.75   10.21
   9   1   1   35.93    8.72
  10  -9   2  288.05   30.81
  -1  10   2  290.68   32.93
  -1  10   2  287.87   32.67
  -9  -1   2  256.52   39.38
 -10   9   2  256.75   38.51
   1 -10   2  201.29   28.86
 -10   9   2  269.33   29.83
  -9  -1   2  261.17   28.57
   9   1   2  291.42   16.90
  -1  10   3   32.93   14.21
  -9  -1   3   58.64   20.26
  10  -9   3   52.73   13.80
   1 -10   3   25.33   13.59
  -9  -1   3   28.28   12.06
 -10   9   3   35.57   10.51
  -9  -1   4  435.11   49.11
  10  -9   4  422.40   36.82
   1 -10   4  399.84   42.91
  -1  10   4  370.77   42.80
  -9  -1   4  433.62   41.77
 -10   9   4  403.90   26.28
  -1  10   5   98.31   24.52
  -9  -1   5  134.52   27.39
  10  -9   5  121.33   20.33
   1 -10   5  153.67   28.75
  -9  -1   5  106.65   23.21
  -1  10   6   12.24   12.68
  10  -9   6    3.78    8.30
   1 -10   6   -6.76   11.86
  -9  -1   6   -2.67    8.20
  -9  -1   6    6.58   10.31
  -1  10   7  148.57   32.75
  -9  -1   7  125.17   25.20
  10  -9   7  133.36   22.43
   1 -10   7   91.36   22.93
  -9  -1   7  136.51   28.47
  -9  -1   8  105.52   22.64
  10  -9   8  112.46   21.23
   1 -10   8  117.67   27.54
  -9  -1   8  108.85   26.53
  -1  10   8   63.46   23.11
   1 -10   9   18.83   13.78
  -9  -1   9   17.89   13.60
  -1  10   9    8.13   11.86
   1 -10  10   32.97   19.53
  -1  10  10   42.65   22.57
  -9  -1  10   11.76   15.31
   9   1  11   11.94   16.83
   1 -10  11   14.12   16.47
  -1  10  11   19.42   16.78
  -9  -1  11   20.52   15.41
   9   1  12   31.67   21.34
  -1  10  12    1.77   14.56
   1 -10  12   53.45   23.04
  -9  -1  12   51.37   21.56
   2 -10 -13   -0.05   12.77
  10  -8 -12   90.44   31.18
   2 -10 -12   69.59   22.16
 -10   8 -12  100.00   36.37
 -10   8 -11   15.25   13.50
  10  -8 -11   44.07   24.91
   2 -10 -11   16.49   13.04
   8   2 -11    3.93    7.75
 -10   8 -11   -6.43   14.85
  -8  -2 -11  -14.36   14.04
  10  -8 -10    1.31   13.77
   2 -10 -10    6.41   12.50
  -8  -2 -10   -6.04   11.03
   8   2 -10   -9.48    9.73
 -10   8 -10   -1.26   15.41
 -10   8 -10   11.14   14.14
   2 -10  -9  370.09   42.31
   8   2  -9  363.91   40.48
  -8  -2  -9  367.51   52.44
 -10   8  -9  387.16   50.60
  10  -8  -9  424.74   55.15
  10  -8  -8   13.32   13.35
  -8  -2  -8   10.17   15.56
   8   2  -8   21.21   12.63
 -10   8  -8   18.62   14.83
   2 -10  -8    6.88   10.94
  10  -8  -7   74.78   24.48
   2 -10  -7   46.30   16.13
  -8  -2  -7   68.68   20.56
 -10   8  -7   34.78   18.96
  10  -8  -6  305.66   41.97
  -8  -2  -6  208.94   38.08
   2 -10  -6  240.04   32.28
 -10   8  -6  175.28   33.24
  10  -8  -5   90.88   22.88
   2 -10  -5   90.17   20.67
  -8  -2  -5   94.41   25.98
 -10   8  -5   51.68   19.94
  10  -8  -4   19.66   12.20
   2 -10  -4    3.03    9.83
  -8  -2  -4    1.24   14.96
 -10   8  -4    9.65   12.35
 -10   8  -3  509.10   53.89
   2 -10  -3  458.33   39.75
  -8  -2  -3  443.97   21.01
  -8  -2  -3  338.03   46.92
  10  -8  -3  448.88   44.66
   2 -10  -2   54.30   16.04
  -8  -2  -2   39.03   17.74
  10  -8  -2    8.48   11.48
  -8  -2  -2   31.81    6.85
 -10   8  -2   18.58   13.87
  -2  10  -1  159.75   27.90
  10  -8  -1  110.36   21.50
  -8  -2  -1  110.13   27.07
   2 -10  -1  148.42   22.90
  -8  -2  -1  110.42   14.90
 -10   8  -1  134.06   27.54
  10  -8   0  375.71   35.04
  -2  10   0  367.95   39.23
  -8  -2   0  283.63   41.23
   2 -10   0  362.69   35.95
  -8  -2   0  339.64   28.50
 -10   8   0  331.02   42.67
  10  -8   1  141.15   21.74
  -8  -2   1  159.71   30.81
  -2  10   1  116.16   18.05
  -2  10   1  145.30   23.29
   2 -10   1  138.12   23.55
  -8  -2   1  109.91   18.03
 -10   8   1  135.41   28.87
   8   2   2   44.75    6.77
  10  -8   2   46.65   13.87
  -2  10   2   31.71   11.97
  -8  -2   2   15.76   10.54
   2 -10   2   28.30   12.92
  -2  10   2   47.70   13.05
  -8  -2   2   50.19   13.92
 -10   8   2   49.17   17.80
  10  -8   3  440.36   35.08
  -2  10   3  462.24   42.31
   2 -10   3  477.03   43.46
 -10   8   3  401.90   45.64
  -8  -2   3  439.66   39.70
  -2  10   3  483.21   39.45
  -8  -2   3  429.19   48.91
 -10   8   4    3.95    8.91
  -8  -2   4    5.42    9.69
  10  -8   4   -2.31    6.40
   2 -10   4   -3.97   11.21
 -10   8   4    5.61    4.54
  -8  -2   4    1.88    8.95
  -2  10   4    6.65   10.33
 -10   8   5   64.24   19.22
  -8  -2   5   57.95   18.63
  10  -8   5   58.41   12.65
   2 -10   5   54.00   17.96
  -8  -2   5   46.59   15.16
  -2  10   5   70.88   19.78
  -8  -2   6  276.43   37.21
  10  -8   6  282.82   28.86
   2 -10   6  244.83   34.62
  -8  -2   6  209.86   33.28
  -2  10   6  178.39   32.96
  -8  -2   7   32.90   14.23
  10  -8   7   50.77   13.85
   2 -10   7   30.34   14.19
  -2  10   7   20.74   14.40
  -8  -2   7   62.90   18.64
  -8  -2   8    1.38    5.92
   2 -10   8    6.35   12.70
  -2  10   8    6.25   10.36
  -8  -2   8   25.49   14.99
   2 -10   9  452.95   53.15
  -2  10   9  328.48   51.20
  -8  -2   9  387.23   49.18
  -2  10  10   16.40   11.88
   8   2  10  -16.81   16.58
   2 -10  10    6.76   12.39
  -8  -2  10   -2.40   11.94
   8   2  11   23.85   18.87
   2 -10  11   33.53   18.33
  -8  -2  11   28.02   16.21
   8   2  12   48.96   24.70
   2 -10  12   58.14   23.23
  -8  -2  12   64.79   22.67
   2 -10  13   31.77   18.22
   3 -10 -14   15.94   15.70
   3 -10 -13   14.06   14.73
 -10   7 -13   15.68   18.97
  10  -7 -12   -4.78   14.49
   7   3 -12   -0.17    7.86
   3 -10 -12    7.85   14.07
  10  -7 -11   44.55   22.04
   7   3 -11   74.29   21.13
  -7  -3 -11   25.48   14.90
 -10   7 -11   41.20   18.54
  10  -7 -10  246.16   44.06
   3 -10 -10  210.69   34.34
  -7  -3 -10  221.28   40.08
   7   3 -10  286.50   38.30
 -10   7 -10  264.76   42.04
  10  -7  -9   26.14   16.68
  -7  -3  -9   69.01   24.63
   7   3  -9   53.38   18.04
   3 -10  -9   45.69   18.91
 -10   7  -9   51.18   19.57
  10  -7  -8  230.46   40.45
  -7  -3  -8  176.56   35.88
   3 -10  -8  155.31   29.08
   7   3  -8  197.79   30.81
 -10   7  -8  136.08   29.35
  10  -7  -7  280.31   42.18
   3 -10  -7  236.94   33.04
  -7  -3  -7  203.35   38.08
   7   3  -7  250.70   33.55
 -10   7  -7  179.15   33.50
  10  -7  -6    6.86   11.66
   3 -10  -6   11.70   10.38
  -7  -3  -6   11.41   14.01
   7   3  -6   16.32   11.92
 -10   7  -6    5.20   10.62
   3 -10  -5  493.26   44.44
   7   3  -5  380.47   39.22
  -7  -3  -5  382.24   18.73
  -7  -3  -5  413.42   51.61
 -10   7  -5  342.45   44.40
  10  -7  -5  365.36   42.65
  10  -7  -4  121.78   25.77
   3 -10  -4  100.74   21.52
  -7  -3  -4   85.11   10.09
  -7  -3  -4   75.79   24.73
 -10   7  -4   92.22   24.57
   3 -10  -3  143.90   23.88
  10  -7  -3  153.70   26.46
  -7  -3  -3  179.25   34.22
  -7  -3  -3  166.93   15.92
 -10   7  -3  133.56   27.29
   3 -10  -2 1224.02   63.20
 -10   7  -2 1239.89   81.45
  -7  -3  -2 1095.31   44.83
  -7  -3  -2 1158.49   82.54
  10  -7  -2 1099.28   63.69
  -7  -3  -1  227.70   37.84
   3 -10  -1  160.94   23.88
  10  -7  -1  151.67   23.51
  -7  -3  -1  155.57   18.71
 -10   7  -1  174.45   31.21
  10  -7   0  399.46   35.40
   3 -10   0  379.53   36.07
 -10   7   0  482.99   49.99
  -7  -3   0  371.08   30.54
  -7  -3   0  383.34   47.42
  -3  10   1  169.87   24.67
   7   3   1  144.43   14.81
  10  -7   1  145.51   21.37
   3 -10   1  174.87   26.12
  -7  -3   1  139.16   28.57
  -7  -3   1  147.74   21.00
 -10   7   1  158.81   29.91
   7   3   2 1036.38   35.74
  -3  10   2 1061.33   57.90
  10  -7   2 1128.69   53.42
   3 -10   2 1126.30   63.49
 -10   7   2 1012.43   71.39
  -7  -3   2 1019.77   57.71
  -7  -3   2 1128.68   78.89
  -7  -3   3  132.31   29.25
  10  -7   3   88.84   15.33
  -3  10   3  119.62   19.06
   3 -10   3  110.45   21.84
  -7  -3   3  144.15   23.73
 -10   7   3  126.23   25.04
   7   3   3  121.76   11.50
  10  -7   4   66.54   12.71
  -7  -3   4   55.61   19.43
   3 -10   4   54.26   15.13
  -7  -3   4   56.57   15.80
 -10   7   4   61.96   18.92
  10  -7   5  399.68   29.79
   3 -10   5  402.49   41.83
 -10   7   5  364.48   42.64
  -7  -3   5  399.93   42.25
  -7  -3   5  361.86   43.75
  10  -7   6   10.49    5.99
   3 -10   6   29.60   12.87
  -7  -3   6    9.38    7.41
  -7  -3   6   28.77   15.22
 -10   7   6   30.53   13.57
  -7  -3   7  239.96   34.04
  10  -7   7  229.20   23.35
   3 -10   7  176.44   30.32
  -7  -3   7  193.58   33.28
  -7  -3   8  198.61   29.90
   3 -10   8  171.58   31.13
  -7  -3   8  202.62   34.74
   3 -10   9   79.06   24.27
  -7  -3   9   60.64   21.99
   7   3  10  193.92   41.82
   3 -10  10  286.57   43.94
  -7  -3  10  227.11   41.07
   7   3  11  104.50   32.80
  10  -7  11   53.51   20.51
   3 -10  11   92.39   27.94
  -7  -3  11   60.70   22.63
  10  -7  12  -15.08   12.41
   7   3  12  -28.23   21.61
   3 -10  12  -11.11   14.64
  -7  -3  12  -25.30   17.17
   3 -10  13  -29.66   18.63
   4 -10 -14   -1.87   14.08
   4 -10 -13   15.86   14.98
  10  -6 -12   53.80   25.30
   6   4 -12   45.66   17.66
   4 -10 -12   42.59   20.07
  10  -6 -11   -4.22   14.96
   4 -10 -11   -4.45   13.86
   6   4 -11   12.39   12.75
  -6  -4 -11    3.39    8.05
 -10   6 -11  -21.77   13.73
  10  -6 -10  -11.29   15.46
   4 -10 -10   37.53   18.60
   6   4 -10   15.93   12.23
  -6  -4 -10   28.85   17.48
 -10   6 -10   31.09   17.03
   4 -10  -9  464.77   50.36
   6   4  -9  423.70   47.38
  -6  -4  -9  430.52   54.85
 -10   6  -9  383.65   49.34
  10  -6  -9  510.85   60.69
  -6  -4  -8   20.80   17.06
  10  -6  -8   22.39   16.08
   4 -10  -8   -3.10   12.02
   6   4  -8   26.70   14.37
 -10   6  -8   13.77   12.59
  10  -6  -7   -2.93   11.96
  -6  -4  -7   15.65   13.91
   6   4  -7   17.57   12.41
 -10   6  -7    5.56   10.40
   4 -10  -7   11.70   12.89
  10  -6  -6   36.62   15.97
   4 -10  -6   77.44   21.25
   6   4  -6   32.06   13.87
  -6  -4  -6   43.34    7.69
 -10   6  -6   44.48   18.17
  -6  -4  -6   37.58   16.54
  10  -6  -5   86.13   21.76
   4 -10  -5   70.49   19.92
   6   4  -5   73.51   18.70
  -6  -4  -5   72.31   10.34
 -10   6  -5   85.91   23.18
  -6  -4  -5   89.57   26.64
  10  -6  -4  162.44   28.33
  -6  -4  -4  155.12   31.85
   4 -10  -4  158.24   26.16
  -6  -4  -4  134.30   14.81
   6   4  -4  118.83   22.51
 -10   6  -4  134.31   28.48
   4 -10  -3  506.70   43.69
  -6  -4  -3  523.75   30.78
 -10   6  -3  444.69   48.73
  -6  -4  -3  504.01   55.09
  10  -6  -3  449.83   42.76
  10  -6  -2   20.61   11.09
   4 -10  -2   36.12   15.29
  -6  -4  -2   36.37    9.30
  -6  -4  -2   33.19   17.22
 -10   6  -2   26.82   15.77
  -6  -4  -1  142.00   30.40
  10  -6  -1  145.22   22.42
   4 -10  -1  171.39   25.00
  -6  -4  -1  175.70   20.60
 -10   6  -1  152.16   29.10
  10  -6   0 1118.92   55.88
   4 -10   0 1074.09   59.44
 -10   6   0 1130.91   75.56
  -6  -4   0 1230.38   56.44
  -6  -4   0 1061.35   77.48
  -6  -4   1  140.26   29.39
   6   4   1  169.93   17.25
   4 -10   1  152.73   22.66
   4 -10   1  173.46   25.27
  -6  -4   1  186.02   23.63
 -10   6   1  135.89   26.44
  10  -6   1  192.21   22.25
  -6  -4   2   22.40   12.54
   6   4   2   49.65    9.32
  10  -6   2   32.64    9.72
   4 -10   2   50.54   14.75
  -4  10   2   31.35   10.81
  -6  -4   2   47.36   14.28
 -10   6   2   46.98   16.50
   6   4   3  447.50   26.88
  -4  10   3  501.94   36.41
  10  -6   3  457.21   30.66
   4 -10   3  526.87   43.58
 -10   6   3  516.96   49.63
  -6  -4   3  499.82   42.93
  -6  -4   3  525.47   54.41
  -6  -4   4  154.01   29.98
  10  -6   4  129.81   15.10
   4 -10   4  162.76   25.76
 -10   6   4  131.19   15.70
  -6  -4   4  120.85   23.43
 -10   6   4  116.59   24.63
  -6  -4   5   65.00   19.01
   4 -10   5   75.98   19.11
  10  -6   5   93.18   12.81
  -6  -4   5   63.93   19.11
 -10   6   5   52.92   15.39
  -6  -4   6   97.57   24.06
   4 -10   6   50.01   17.76
  10  -6   6   58.86   10.53
  -6  -4   6   67.64   18.85
 -10   6   6   71.21   18.78
  -6  -4   7    1.17    7.64
   4 -10   7   13.24   12.34
  -6  -4   7    3.60   10.13
 -10   6   7    6.61    7.23
 -10   6   8   37.81   13.36
  -6  -4   8   34.51   13.15
   4 -10   8   10.97   10.31
  -6  -4   8   18.21   12.95
   4 -10   9  467.78   52.63
  -6  -4   9  448.17   52.41
   6   4   9  433.40   59.20
   6   4  10   16.27   14.33
   4 -10  10   59.55   22.80
  -6  -4  10   28.65   18.87
  10  -6  11   -2.75    8.79
   4 -10  11   11.98   12.67
  -6  -4  11   27.78   18.52
   6   4  12   45.88   25.25
  10  -6  12   76.93   27.77
   4 -10  12   60.14   23.20
  -6  -4  12   91.82   27.85
  10  -6  13   18.20   15.99
   4 -10  13   23.87   21.51
   6   4  13   -8.78   17.41
   4 -10  14    3.76   12.48
   5 -10 -14  -26.64   19.86
   5   5 -13   15.91   15.49
  10  -5 -13   50.70   30.05
   5 -10 -13   19.75   15.91
  10  -5 -12   32.55   22.27
   5 -10 -12   47.89   19.85
   5   5 -12   66.41   23.36
   5   5 -11   59.51   21.98
  10  -5 -11   42.69   23.44
  -5  -5 -11   33.70   15.91
   5 -10 -11   38.82   21.23
 -10   5 -11   28.03   15.01
  10  -5 -10   84.72   31.03
   5 -10 -10   76.12   23.87
   5   5 -10   89.02   24.25
  -5  -5 -10   80.74   26.44
 -10   5 -10   83.54   24.91
  -5  -5  -9   40.42   19.33
   5   5  -9   44.17   20.04
   5 -10  -9   58.89   21.06
  10  -5  -9   80.03   25.85
 -10   5  -9   33.89   17.05
  10  -5  -8   70.14   23.90
   5 -10  -8   87.88   22.85
   5   5  -8   91.43   23.87
  -5  -5  -8   83.28   25.37
 -10   5  -8  101.59   25.98
  10  -5  -7    1.65   13.75
  -5  -5  -7   14.35   11.83
   5 -10  -7   12.90   14.53
   5   5  -7    1.05    9.44
 -10   5  -7   12.94   12.81
  10  -5  -6   30.90   15.66
  -5  -5  -6   21.07   17.44
   5 -10  -6   33.89   18.12
   5   5  -6   15.97   11.07
  -5  -5  -6   30.45    8.18
 -10   5  -6   30.15   15.56
   5 -10  -5  226.77   33.03
  -5  -5  -5  216.16   19.53
  -5  -5  -5  235.07   40.11
  10  -5  -5  234.63   35.40
   5   5  -5  190.62   29.60
 -10   5  -5  199.77   34.03
  10  -5  -4   -0.54   10.96
 -10   5  -4    9.06    5.06
  -5  -5  -4   -2.48   13.70
   5 -10  -4    4.87   12.73
   5   5  -4   -2.62    8.28
  -5  -5  -4    2.28    3.84
 -10   5  -4   -4.50   11.66
   5 -10  -4   -1.91    4.22
 -10   5  -3  116.21   16.30
   5 -10  -3  118.89   23.24
  10  -5  -3  103.06   22.47
   5   5  -3  101.22   21.23
  -5  -5  -3   84.60   23.34
  -5  -5  -3   92.86   14.06
 -10   5  -3  113.00   26.22
   5 -10  -2  326.34   33.58
   5   5  -2  316.32   34.80
  -5  -5  -2  335.20   27.36
 -10   5  -2  324.52   42.03
 -10   5  -2  300.76   27.68
  -5  -5  -2  394.03   48.68
  10  -5  -2  377.52   36.76
 -10   5  -1  908.62   68.09
  -5  -5  -1  985.88   49.29
   5 -10  -1  833.60   49.34
  -5  -5  -1  927.68   73.21
   5 -10  -1  902.27   54.57
  10  -5  -1  927.40   52.79
  10  -5   0  993.22   50.91
   5 -10   0 1100.62   59.05
 -10   5   0  997.80   70.66
  -5  -5   0 1032.85   52.96
   5 -10   0  948.63   46.77
  -5  -5   0 1042.58   76.33
  10  -5   1  966.05   46.56
   5 -10   1  942.75   55.40
 -10   5   1  863.18   64.70
  -5  -5   1  870.86   51.40
   5 -10   1  860.11   37.48
  -5  -5   1  961.06   73.37
  -5  -5   2  301.91   41.50
  10  -5   2  350.90   26.18
   5 -10   2  342.76   34.54
  -5  -5   2  330.63   33.52
   5 -10   2  293.55   16.02
  10  -5   2  309.75   23.00
 -10   5   2  250.35   34.63
  10  -5   3  107.33   13.64
  -5  -5   3  139.08   29.59
   5   5   3  137.85   17.20
  -5  10   3  120.59   17.08
   5 -10   3  116.74   21.38
  -5  -5   3   96.16   20.53
 -10   5   3   97.72   21.79
   5   5   4    3.85    4.11
  -5  10   4    0.16    4.25
  10  -5   4   -1.86    3.09
   5 -10   4    4.10    8.59
  -5  -5   4   -7.64   13.40
  -5  -5   4   -2.30    7.80
 -10   5   4    3.90    9.05
  -5  -5   5  223.88   34.88
  10  -5   5  255.27   15.97
   5 -10   5  235.05   30.90
  -5  -5   5  309.68   37.51
 -10   5   5  264.07   35.25
  -5  -5   6   40.27   16.97
   5 -10   6   44.99   16.00
  -5  -5   6   44.13   17.21
 -10   5   6   33.96   11.24
  -5  -5   7   22.33   13.07
   5 -10   7   13.44   12.34
  -5  -5   7    4.04   10.45
 -10   5   7    3.14    6.38
   5   5   8   59.92   22.72
   5 -10   8   63.02   19.27
  -5  -5   8   70.72   18.50
  -5  -5   8   70.85   22.02
 -10   5   8   75.25   18.10
   5   5   9   40.44   19.87
   5 -10   9   45.03   16.64
  -5  -5   9   56.12   20.67
   5 -10  10   99.06   25.84
   5   5  10   49.98   25.53
  -5  -5  10  111.15   30.79
   5   5  11   13.83   16.81
   5 -10  11   54.68   21.78
  -5  -5  11   32.64   19.88
   5 -10  12   34.60   17.77
  -5  -5  12   56.56   21.55
  10  -5  12   39.30   19.95
   5   5  12   20.46   20.15
   5   5  13   25.93   22.23
   5 -10  13   36.42   20.14
  10  -5  13    0.23    8.71
  -5  -5  13   37.80   22.41
  10  -5  14    8.27   14.00
   5 -10  14   42.57   21.48
   4   6 -14   -2.48   11.84
   6 -10 -13   -0.58   13.68
   4   6 -13    0.06   11.26
  10  -4 -12  133.86   36.68
   6 -10 -12   67.92   25.05
   4   6 -12  136.22   33.12
  -6  10 -12   88.25   33.26
  -6  10 -11   44.81   25.61
   4   6 -11    0.60   10.78
   6 -10 -11   30.30   17.77
  10  -4 -11   20.73   18.90
  -4  -6 -11   36.04   18.56
 -10   4 -11   30.41   17.96
   6 -10 -10    1.19   13.61
  -6  10 -10  -14.96   17.02
  -4  -6 -10   42.61   22.01
   4   6 -10    4.29   12.73
  10  -4 -10    3.60   12.40
 -10   4 -10   18.66   14.75
   6 -10  -9   60.24   21.09
  -4  -6  -9   59.89   24.12
  -6  10  -9   80.41   26.35
   4   6  -9  117.13   28.31
  10  -4  -9  128.51   32.23
 -10   4  -9  105.20   27.40
  -4  -6  -8   22.82   14.43
   6 -10  -8   21.33   15.47
  -6  10  -8   57.02   23.24
   4   6  -8   39.17   15.77
  10  -4  -8   39.07   18.75
 -10   4  -8   45.87   19.20
  -4  -6  -7    5.64   13.77
  -6  10  -7   24.70   16.41
   4   6  -7   22.80   11.62
  -4  -6  -7   38.81    9.15
   6 -10  -7   38.33   17.11
  10  -4  -7    3.31    8.38
 -10   4  -7   18.30   13.72
  10  -4  -6  218.07   35.26
  -4  -6  -6  193.38   18.89
  -4  -6  -6  229.15   40.06
   6 -10  -6  247.98   36.39
   4   6  -6  256.32   36.50
 -10   4  -6  253.60   39.70
  -6  10  -6  196.91   37.53
  -4  -6  -5  186.90   36.49
  -6  10  -5  145.93   30.65
   4   6  -5  207.35   31.27
  -4  -6  -5  196.00   20.82
  10  -4  -5  241.94   36.14
 -10   4  -5  193.93   34.48
   6 -10  -5  204.27   32.08
   6 -10  -4  326.05   37.59
  10  -4  -4  265.46   36.28
  -4  -6  -4  356.75   47.40
  -6  10  -4  278.98   39.56
  -4  -6  -4  350.47   27.85
   4   6  -4  260.66   34.31
 -10   4  -4  341.52   44.97
  -4  -6  -3  269.41   41.01
   6 -10  -3  281.69   34.90
  -4  -6  -3  298.81   25.97
   4   6  -3  246.82   31.77
 -10   4  -3  288.64   40.64
  10  -4  -3  347.34   38.28
  -4  -6  -2   62.67   22.83
  10  -4  -2   80.59   18.01
   6 -10  -2   87.86   20.83
   4   6  -2   84.84   19.86
  -4  -6  -2   93.07   15.75
 -10   4  -2   71.29   20.24
  -4  -6  -1   73.25   21.72
  10  -4  -1  103.73   18.42
   6 -10  -1  128.41   22.68
  -4  -6  -1  119.66   18.23
   4   6  -1  108.54   21.99
 -10   4  -1  115.76   24.66
   6 -10   0  894.03   54.07
  -4  -6   0  831.20   48.61
   6 -10   0  755.53   44.64
 -10   4   0  927.58   68.63
  -4  -6   0  851.95   68.88
  10  -4   0  946.77   47.83
  -4  -6   1   99.28   24.56
  10  -4   1   97.04   15.46
   6 -10   1   83.66   17.68
  -4  -6   1  114.15   19.64
 -10   4   1  113.53   24.51
  10  -4   1  120.43   14.91
   6 -10   1  103.43   14.95
  -4  -6   2  116.71   26.48
  10  -4   2   95.96   13.37
   6 -10   2   67.49   16.23
   6 -10   2  100.30   20.04
  -4  -6   2   97.20   19.71
 -10   4   2  105.17   24.68
   6 -10   2   93.70   12.25
  10  -4   2   97.17   11.75
  -4  -6   3  255.30   37.64
  -6  10   3  310.21   26.66
  10  -4   3  263.97   18.16
  -4  -6   3  277.77   32.99
   6 -10   3  249.07   29.75
  10  -4   3  281.50   16.52
 -10   4   3  285.67   37.83
  -4  -6   4  279.64   39.64
  -6  10   4  305.89   23.22
   6 -10   4  287.15   32.35
  -4  -6   4  261.28   33.29
 -10   4   4  260.05   35.16
  -4  -6   5  224.99   34.95
   6 -10   5  203.69   28.72
  -4  -6   5  174.73   29.10
 -10   4   5  157.61   27.65
   4   6   6  192.72   35.14
  -4  -6   6  173.77   30.86
   6 -10   6  251.22   33.42
  -4  -6   6  214.96   33.11
 -10   4   6  195.84   29.93
  -4  -6   7   32.73   14.70
   4   6   7   36.18   18.94
   6 -10   7   30.39   13.12
  -4  -6   7   30.25   16.69
 -10   4   7   17.42   10.10
  -4  -6   8   35.89   14.10
   4   6   8   50.85   21.56
   6 -10   8   37.97   15.30
  -4  -6   8   69.95   22.19
 -10   4   8   38.45   13.02
   4   6   9   80.12   26.49
   6 -10   9   99.29   24.25
  -4  -6   9   92.30   25.61
   4   6  10   24.38   16.29
   6 -10  10   28.02   17.14
  -4  -6  10    2.15   10.15
   6 -10  11   17.90   13.05
  -4  -6  11   19.02   14.94
   4   6  11   -0.77   17.07
  10  -4  12  126.19   35.45
   4   6  12  103.25   34.33
   6 -10  12   99.59   27.49
  -4  -6  12  118.91   32.67
  10  -4  13  -13.83   16.13
   4   6  13    9.22   13.21
   6 -10  13  -10.11   14.53
  -4  -6  13   38.41   20.88
  10  -4  14   -5.13   14.04
   6 -10  14   19.67   15.70
   7 -10 -13   60.60   23.46
  10  -3 -12   27.54   20.74
   7 -10 -12   27.07   20.63
  -7  10 -12   11.23   15.70
  10  -3 -11   52.49   23.13
  -7  10 -11   53.15   26.99
   7 -10 -11   65.87   22.46
 -10   3 -11   29.98   16.39
  -3  -7 -11   45.06   18.59
  10  -3 -10   76.94   28.02
  -7  10 -10   15.81   16.84
   7 -10 -10   -6.91   14.11
 -10   3 -10   37.84   18.89
  -3  -7 -10   40.98   17.63
  10  -3  -9   36.98   19.01
   3   7  -9   43.83   19.82
  -7  10  -9  -13.19   14.67
  -3  -7  -9   56.21   23.05
   7 -10  -9   47.37   19.27
 -10   3  -9   11.56   12.28
  10  -3  -8    6.13   11.50
  -7  10  -8   -5.67   13.50
  -3  -7  -8   22.59   14.73
   7 -10  -8    4.77   16.76
   3   7  -8   40.45   18.52
  -3  -7  -8   22.38    9.37
 -10   3  -8   49.51   20.19
  10  -3  -7   10.40   12.51
  -3  -7  -7   37.08   10.20
  -7  10  -7   21.11   17.65
   7 -10  -7   20.83   13.83
   3   7  -7   23.30   14.33
 -10   3  -7   16.69   15.57
  -3  -7  -7   48.03   20.26
  10  -3  -6  131.31   28.88
  -7  10  -6  142.95   32.77
   7 -10  -6  132.90   28.67
   3   7  -6   93.06   23.04
  -3  -7  -6  102.40   16.08
  -3  -7  -6  143.04   31.91
 -10   3  -6  114.17   28.37
  10  -3  -5  147.39   29.78
  -3  -7  -5  157.77   33.76
  -7  10  -5  206.54   36.71
  -3  -7  -5  213.95   22.43
   7 -10  -5  210.67   33.27
   3   7  -5  189.96   31.20
 -10   3  -5  153.86   31.29
   3   7  -4  426.58   44.40
  -3  -7  -4  419.92   33.56
 -10   3  -4  350.72   45.93
  -7  10  -4  417.91   49.44
   7 -10  -4  329.61   38.94
  -3  -7  -4  427.97   52.76
  10  -3  -4  371.84   42.49
  -7  10  -3  162.73   28.96
   7 -10  -3  177.05   28.41
   3   7  -3  226.68   31.55
  -3  -7  -3  209.23   23.68
  10  -3  -3  224.69   30.87
 -10   3  -3  231.76   37.97
  -3  -7  -3  185.95   34.47
   7 -10  -2  958.54   59.84
 -10   3  -2  871.76   70.26
   3   7  -2  910.35   60.51
  -3  -7  -2  962.51   50.24
  -7  10  -2  876.99   64.34
  10  -3  -2  952.18   58.23
   7 -10  -1  487.46   41.88
 -10   3  -1  499.22   52.86
  -3  -7  -1  548.53   39.10
   3   7  -1  550.63   46.36
  10  -3  -1  553.33   40.40
  10  -3   0    6.43    6.94
   7 -10   0   11.77   12.77
  -3  -7   0   -3.32    7.53
   3   7   0   10.14    7.48
 -10   3   0   -7.35   12.91
 -10   3   1  549.18   53.16
   7 -10   1  587.03   43.92
  -3  -7   1  537.79   42.24
  10  -3   1  514.16   29.28
  10  -3   1  544.62   31.97
 -10   3   2  948.41   69.23
   7 -10   2  975.24   57.06
  10  -3   2  997.04   35.81
  -3  -7   2 1029.85   60.74
  10  -3   2  928.62   32.18
  10  -3   3  211.50   12.75
   7 -10   3  199.23   26.13
  -3  -7   3  201.92   28.74
 -10   3   3  213.35   32.46
  -7  10   4  384.64   24.23
 -10   3   4  381.78   43.22
   7 -10   4  377.27   37.02
  -3  -7   4  356.24   39.67
   7 -10   5  165.10   26.04
  -3  -7   5  191.09   30.16
 -10   3   5  150.73   27.27
   3   7   5  213.32   36.26
   3   7   6  139.64   30.39
   7 -10   6  180.99   28.10
  -3  -7   6   85.09   21.78
 -10   3   6  105.67   23.12
  -3  -7   7   28.91   13.12
   7 -10   7   52.21   16.57
  -3  -7   7   27.37   16.64
 -10   3   7   24.79   13.08
   3   7   7   10.53   13.03
  -3  -7   8   26.09   12.34
   3   7   8   34.95   18.94
   7 -10   8   32.92   15.97
  -3  -7   8   12.64   10.30
 -10   3   8   21.37   10.03
   3   7   9    5.50   11.29
   7 -10   9   37.11   15.73
  -3  -7   9   44.28   20.54
   7 -10  10   21.66   12.04
  -3  -7  10   14.91   14.02
   3   7  10   19.00   18.92
   3   7  11   28.72   21.84
   7 -10  11   -1.99    9.96
  -3  -7  11   39.31   21.96
   3   7  12   15.62   19.07
  10  -3  12   24.32   17.57
   7 -10  12   -4.02   10.21
  -3  -7  12   -7.97   12.84
  10  -3  13   -5.24   11.26
  10  -2 -12   18.19   19.32
  -8  10 -12   17.17   22.23
   8 -10 -12   46.74   22.33
  10  -2 -11  -20.21   18.96
  -2  -8 -11   11.82   12.14
  -8  10 -11   30.43   19.77
   8 -10 -11   47.18   21.68
 -10   2 -11   14.14   13.25
  10  -2 -10   31.22   17.55
  -8  10 -10   27.51   21.59
  -2  -8 -10   13.59   13.05
   8 -10 -10   42.52   20.61
 -10   2 -10   18.99   14.20
  10  -2  -9  161.46   35.79
  -8  10  -9  125.16   34.46
  -2  -8  -9  166.93   24.38
  -2  -8  -9  111.92   30.32
   8 -10  -9  115.23   30.09
 -10   2  -9   92.79   28.03
  10  -2  -8   25.27   16.69
  -2  -8  -8   -5.86   11.66
   8 -10  -8   -5.30   13.84
  -2  -8  -8   15.85    9.52
 -10   2  -8    6.72   11.93
  -8  10  -8   -7.96   15.28
  -2  -8  -7   14.03   14.16
   8 -10  -7    9.84   12.59
  -2  -8  -7   26.60   11.42
  10  -2  -7   24.27   16.04
 -10   2  -7    8.50   11.35
  -8  10  -7   39.03   19.13
  10  -2  -6  148.59   30.38
   8 -10  -6  160.63   31.19
   2   8  -6  161.06   30.83
 -10   2  -6   88.98   26.36
  -2  -8  -6  158.34   21.85
  -2  -8  -6  126.40   30.03
  -8  10  -6  149.98   33.42
  10  -2  -5   41.68   18.00
   8 -10  -5   29.99   15.36
   2   8  -5   56.60   20.42
 -10   2  -5   50.13   20.82
  -2  -8  -5   38.92   11.61
  -8  10  -5   53.20   20.00
  10  -2  -4   35.14   16.98
   8 -10  -4   37.81   18.89
   2   8  -4   69.05   20.07
  -2  -8  -4   55.19   13.12
 -10   2  -4   55.40   20.98
  -8  10  -4   46.32   19.56
  -8  10  -3  282.98   40.20
   2   8  -3  348.91   40.58
   8 -10  -3  325.56   38.05
  -2  -8  -3  308.57   30.64
 -10   2  -3  279.52   42.00
  10  -2  -3  356.31   39.43
   8 -10  -2  316.80   36.48
   2   8  -2  359.71   39.78
  -2  -8  -2  377.20   33.84
 -10   2  -2  311.20   44.58
  -8  10  -2  349.60   41.92
  10  -2  -2  434.00   40.44
  10  -2  -1   77.78   16.14
  -8  10  -1   85.20   19.91
   8 -10  -1   82.23   20.40
   2   8  -1   93.43   20.85
  -2  -8  -1   77.20   16.28
 -10   2  -1   70.31   22.65
   8 -10   0 1320.97   67.69
   2   8   0 1179.20   67.70
  -2  -8   0 1204.00   62.41
  10  -2   0 1133.87   47.69
  -8  10   0 1156.75   67.91
 -10   2   0 1310.90   85.80
  10  -2   0 1304.74   55.06
  10  -2   1  111.96   14.21
   8 -10   1   85.17   18.28
  -2  -8   1  103.69   20.16
 -10   2   1   98.77   24.42
  10  -2   1   83.24   11.04
  10  -2   2  370.71   19.60
 -10   2   2  432.82   48.46
   8 -10   2  398.05   37.06
  -2  -8   2  386.96   38.42
  10  -2   2  360.72   17.14
 -10   2   3  327.55   41.49
   8 -10   3  245.08   30.05
   8 -10   3  288.43   31.79
  -2  -8   3  385.42   39.22
   2   8   3  310.93   38.54
  -8  10   4   48.02    8.58
   8 -10   4   46.45   14.80
 -10   2   4   54.19   17.35
  -2  -8   4   63.30   18.31
   2   8   4   42.79   16.85
   8 -10   5   83.30   19.16
 -10   2   5   22.26   12.29
  -2  -8   5   64.11   18.40
   2   8   5   40.73   16.97
   2   8   6  202.48   37.15
   8 -10   6  144.24   25.61
 -10   2   6  150.68   27.50
  -2  -8   6  167.76   29.75
   2   8   7   19.36   17.33
   8 -10   7   44.15   14.24
 -10   2   7   20.31   11.16
  -2  -8   7   17.34   13.75
   8 -10   8  -14.38   10.90
 -10   2   8   10.01    6.70
  -2  -8   8   13.02   13.57
   2   8   8   19.10   15.95
   8 -10   9  134.35   27.04
   2   8   9   86.62   29.22
  -2  -8   9  109.59   26.96
   2   8  10   55.18   25.19
   8 -10  10   18.68   13.00
  -2  -8  10   24.28   15.50
   2   8  11   19.69   18.00
   8 -10  11   12.25    9.89
  -2  -8  11    5.01   12.98
   2   8  12   13.60   16.81
  10  -2  12    3.56   12.22
  -2  -8  12  -21.82   17.81
  10  -2  13   23.64   21.09
  -9  10 -12   -1.27   20.10
   9 -10 -12   39.04   22.49
  10  -1 -12    4.10   16.21
   9 -10 -11   15.07   15.96
 -10   1 -11    8.79   13.43
  -9  10 -11   40.33   24.78
  10  -1 -11   15.21   16.70
  -1  -9 -10   24.28   18.25
   9 -10 -10   48.25   23.36
  -1  -9 -10   62.77   18.16
 -10   1 -10   65.11   23.63
  -9  10 -10   40.46   24.62
  10  -1 -10   60.71   25.32
   9 -10  -9  112.00   30.12
  -1  -9  -9   67.98   17.65
  -1  -9  -9  110.73   30.58
 -10   1  -9  126.79   32.27
  -9  10  -9   52.17   24.72
  10  -1  -9   72.64   25.12
  -1  -9  -8   -2.23   12.16
  -1  -9  -8   20.61   11.78
 -10   1  -8   16.21   13.45
   9 -10  -8   11.95   15.91
  -9  10  -8   14.75   14.68
  10  -1  -8   11.33   14.62
   9 -10  -7  110.19   28.35
  -1  -9  -7  177.30   25.05
 -10   1  -7  159.46   35.83
  -9  10  -7  118.91   31.52
  10  -1  -7  184.96   35.34
   9 -10  -6  150.07   29.62
  -1  -9  -6  227.38   28.09
  10  -1  -6  213.95   36.26
 -10   1  -6  217.18   40.29
  -9  10  -6  183.28   37.97
   9 -10  -5  736.54   61.98
 -10   1  -5  712.45   69.81
   1   9  -5  738.15   64.93
  -1  -9  -5  777.76   49.49
  -9  10  -5  831.43   75.20
  10  -1  -5  676.94   61.13
   9 -10  -4   25.98   16.29
  -1  -9  -4    9.15    7.93
 -10   1  -4   11.43   12.50
   1   9  -4    6.79   12.01
  -9  10  -4    7.14   11.88
  10  -1  -4   11.74    9.02
   9 -10  -3   38.13   18.16
   1   9  -3   13.40   12.01
  -1  -9  -3   28.83   10.07
 -10   1  -3   38.85   19.02
  -9  10  -3   12.12   11.11
  10  -1  -3   27.78   13.80
  10  -1  -2   83.81   19.60
   9 -10  -2   52.66   17.33
   1   9  -2   60.02   17.57
  -1  -9  -2   76.50   17.86
 -10   1  -2   58.61   21.12
  -9  10  -2   52.66   19.02
   9 -10  -1   14.81   13.09
   1   9  -1   43.13   14.96
  -1  -9  -1   22.99   13.09
 -10   1  -1    6.84   12.41
  10  -1  -1   19.10   10.11
  -9  10  -1   15.77   10.92
  -9  10   0   70.07   18.15
  10  -1   0   63.35   12.52
   1   9   0   52.35   13.53
   9 -10   0   75.53   18.65
   1   9   0   60.19   16.12
 -10   1   0   48.61   24.87
  -1  -9   0   60.69   16.23
  10  -1   1   19.82    6.64
  -9  10   1   25.01   11.48
   9 -10   1   13.79    8.86
   1   9   1   28.64   11.28
  -1  -9   1   17.15   11.08
   1   9   1   30.09   12.91
  10  -1   2   75.48    8.18
  -9  10   2   62.21   14.55
   9 -10   2   80.32   18.05
 -10   1   2   99.63   25.80
  -1  -9   2   79.41   18.77
   1   9   2   67.38   18.09
 -10   1   2   67.32   14.61
   9 -10   3   38.66   14.58
   9 -10   3   39.43   13.40
 -10   1   3    9.21   10.61
   1   9   3   28.78   12.22
  -1  -9   3   37.21   17.34
 -10   1   3   14.53    8.34
   1   9   4   35.27   16.63
   9 -10   4   14.13    9.42
 -10   1   4   34.50   16.03
  -1  -9   4   27.08   14.50
 -10   1   4   17.01   10.15
 -10   1   5  747.39   62.41
   9 -10   5  764.27   53.42
  -1  -9   5  728.90   59.51
   1   9   5  664.61   63.13
 -10   1   5  710.71   54.30
   9 -10   6  212.06   29.15
 -10   1   6  154.93   28.53
  -1  -9   6  215.34   34.91
   1   9   6  245.97   40.58
 -10   1   6  176.90   29.34
   9 -10   7  171.83   28.37
 -10   1   7  158.98   27.66
  -1  -9   7  140.97   28.82
   1   9   7  124.29   31.89
 -10   1   7  139.60   27.60
   1   9   8   21.41   14.03
   9 -10   8    0.52    9.13
 -10   1   8    9.64    8.64
  -1  -9   8   16.19   12.83
 -10   1   8   17.96   13.21
   1   9   9  120.97   35.58
   9 -10   9   89.48   21.80
  -1  -9   9   44.16   19.84
 -10   1   9   84.28   23.56
   1   9  10   88.03   31.06
   9 -10  10   98.37   24.03
  -1  -9  10   70.55   23.52
 -10   1  10   36.42   18.58
   1   9  11   40.43   19.55
  -1  -9  11   25.32   18.00
   1   9  12    6.86   14.25
  10  -1  12   18.42   21.31
  -1  -9  12   -2.96   10.49
  10   0 -12   28.37   18.19
  10 -10 -11   30.44   21.77
 -10   0 -11    5.11   11.59
 -10  10 -11   -0.62   14.42
  10   0 -11  -19.96   17.87
   0 -10 -10   35.52   19.43
  10 -10 -10   56.78   24.39
   0 -10 -10   53.34   18.33
 -10   0 -10   15.35   15.22
 -10  10 -10   42.61   27.14
  10   0 -10   54.35   25.08
   0 -10  -9   50.90   16.41
  10 -10  -9   64.54   23.25
 -10   0  -9   40.18   20.29
 -10  10  -9   61.49   27.14
   0 -10  -9   23.65   16.54
  10 -10  -8   -8.50   11.62
   0 -10  -8    6.82   10.88
 -10   0  -8   -6.40   13.60
 -10  10  -8    1.74   14.11
  10 -10  -7   40.49   20.12
   0 -10  -7   52.89   16.98
 -10   0  -7   29.43   17.17
 -10  10  -7   65.58   25.97
 -10   0  -6  499.34   61.30
   0 -10  -6  414.14   39.55
 -10  10  -6  506.58   63.64
  10 -10  -6  433.51   50.15
  10 -10  -5  -29.96   18.04
   0 -10  -5   10.13   11.24
 -10   0  -5    6.17   13.16
 -10  10  -5   -2.96   17.54
 -10  10  -4   43.05   18.94
   0  10  -4    7.01   15.14
  10 -10  -4    2.45   14.44
   0 -10  -4   42.75   13.87
 -10   0  -4   60.54   21.07
 -10  10  -4    8.86   14.20
   0  10  -3  238.89   35.97
   0 -10  -3  224.29   28.70
 -10  10  -3  233.77   38.57
 -10   0  -3  230.25   40.74
  10 -10  -3  258.47   35.94
 -10  10  -3  183.72   34.03
  10   0  -3  278.36   35.54
   0  10  -2   86.32   21.86
  10   0  -2   50.18   15.52
   0 -10  -2   84.12   19.66
 -10   0  -2   46.16   20.70
  10 -10  -2  113.56   24.56
   0  10  -2   66.81    9.82
 -10  10  -2   43.26   17.86
  10 -10  -1   35.55   15.76
   0  10  -1   15.93   11.10
 -10   0  -1   30.66   17.12
   0 -10  -1   12.56    9.70
   0  10  -1   23.60    7.34
 -10  10  -1   11.96    8.04
  10   0  -1   19.67    8.73
  10 -10   0  292.72   33.86
   0  10   0  305.88   36.29
   0 -10   0  353.45   36.49
 -10   0   0  316.33   47.22
   0  10   0  255.43   26.71
 -10   0   0  269.59   23.88
 -10  10   0  252.61   34.15
  10   0   0  277.99   27.56
  10 -10   1   35.56   14.32
 -10   0   1   49.36   21.14
  10   0   1   29.69    8.06
   0  10   1   21.51   11.86
   0 -10   1   26.60   13.00
   0  10   1   22.92    9.98
 -10   0   1   35.81   10.64
 -10  10   1   22.05   10.32
 -10  10   2   49.09   13.03
  10 -10   2   83.38   18.08
 -10   0   2   68.77   22.45
   0 -10   2   56.07   16.37
   0  10   2   47.77   15.04
 -10   0   2   57.35   14.21
  10 -10   3  227.99   29.32
 -10   0   3  210.40   37.15
   0 -10   3  239.18   33.46
   0  10   3  219.34   32.77
 -10  10   3  234.11   24.78
 -10   0   3  215.78   27.78
  10 -10   4   41.34   13.42
 -10   0   4    3.36    9.29
   0 -10   4   24.15   11.23
   0  10   4   24.00   11.88
 -10   0   4   25.77   11.33
   0  10   5   11.01   11.04
  10 -10   5   16.08   11.40
 -10   0   5   14.93   12.07
   0 -10   5   11.57   10.18
 -10   0   5    8.88    7.03
 -10   0   6  401.42   46.78
  10 -10   6  416.21   40.58
   0  10   6  383.68   50.72
   0 -10   6  371.05   44.81
 -10   0   6  427.32   45.27
   0  10   7   49.72   19.97
 -10   0   7   49.58   15.90
  10 -10   7   67.53   18.16
   0 -10   7   32.77   14.32
 -10   0   7   60.61   19.15
 -10   0   8    2.97    7.86
  10 -10   8    9.97    8.88
   0 -10   8   -0.24    8.58
   0  10   8   -3.37   14.52
 -10   0   8  -14.96   12.01
   0 -10   9   62.81   22.28
   0  10   9   62.75   26.45
 -10   0   9   20.02   13.37
   0  10  10   70.74   27.95
   0 -10  10   44.07   21.16
 -10   0  10   36.05   17.00
   0 -10  11    4.12   10.21
 -10   0  11  -10.43   13.53
   0  10  11  -27.99   20.16
  10   0  12   39.82   23.91
   0 -10  12   43.19   20.91
   0  10  12   58.25   31.12
 -10   0  12   21.06   20.04
   1 -11 -11   10.30   12.55
  11 -10 -11   19.43   17.82
 -10  -1 -11   -1.80   12.33
 -11  10 -11    7.18   13.73
   1 -11 -10   35.94   14.66
 -10  -1 -10   45.20   21.03
  11 -10 -10   48.63   22.27
 -11  10 -10   48.95   24.34
   1 -11 -10    4.07   11.72
  11 -10  -9   28.30   17.67
   1 -11  -9   53.19   18.20
 -10  -1  -9   38.79   21.49
 -11  10  -9   15.09   19.17
  11 -10  -8  148.44   32.81
   1 -11  -8  108.35   24.03
 -11  10  -8  156.15   34.62
 -10  -1  -8  166.07   37.96
 -11  10  -8  117.76   36.64
 -11  10  -7  153.56   34.26
   1 -11  -7  165.44   27.77
 -10  -1  -7  107.46   32.38
 -11  10  -7  101.36   32.86
 -11  10  -6   88.34   26.31
  11 -10  -6   92.17   24.52
   1 -11  -6  133.79   24.53
 -10  -1  -6  102.58   29.88
 -11  10  -6  139.59   35.15
 -11  10  -5   -8.25   12.17
   1 -11  -5    8.98    9.88
 -10  -1  -5    1.74   19.66
  11 -10  -5    2.69   13.26
 -11  10  -5    0.84   13.49
   1 -11  -4  153.25   25.58
 -10  -1  -4  168.98   36.75
 -11  10  -4  112.19   28.41
  11 -10  -4  157.21   30.21
 -11  10  -4  162.95   35.69
  -1  11  -3  233.89   36.83
  11 -10  -3  210.45   33.70
   1 -11  -3  208.75   29.43
 -10  -1  -3  146.31   32.30
 -11  10  -3  219.43   38.52
 -11  10  -3  155.19   35.41
  11 -10  -2   74.68   20.55
  -1  11  -2   17.44   12.21
   1 -11  -2   73.25   18.62
 -10  -1  -2   98.63   28.37
   1 -11  -2   59.44   16.27
 -11  10  -2   69.50   21.88
 -11  10  -2  128.46   31.15
 -11  10  -1   39.69   17.21
  11 -10  -1   62.09   17.65
 -10  -1  -1   61.02   23.71
   1 -11  -1   47.88   16.12
  -1  11  -1   55.38   17.93
 -11  10  -1   37.61   15.36
 -10  -1  -1   33.87    8.11
 -11  10   0  110.55   29.82
  11 -10   0   76.90   19.52
  -1  11   0   77.98   19.98
 -10  -1   0   55.18   22.86
   1 -11   0   78.27   20.14
  10   1   0   72.10   15.01
 -11  10   0   61.72   18.10
 -10  -1   0   54.80   12.32
  -1  11   0   69.11   13.09
  -1  11   1   29.20   10.28
 -11  10   1   49.93   19.98
  11 -10   1   27.80   13.69
 -10  -1   1   38.79   16.99
  -1  11   1   48.21   16.15
   1 -11   1   24.42   12.14
 -11  10   1   24.32   13.36
 -10  -1   1   41.77   11.47
  -1  11   2   58.26   16.26
  11 -10   2   58.60   16.04
 -10  -1   2   59.20   20.88
   1 -11   2  100.10   22.80
  -1  11   2   80.63   19.48
 -10  -1   2   72.07   16.19
 -11  10   2   52.67   14.99
  -1  11   3  190.76   29.67
  11 -10   3  207.53   27.76
 -10  -1   3  224.27   38.81
   1 -11   3  189.26   30.42
 -10  -1   3  171.25   26.01
 -11  10   3  163.04   22.30
  -1  11   4  173.01   30.74
 -10  -1   4  178.24   35.34
  11 -10   4  184.58   25.81
   1 -11   4  194.23   31.53
 -10  -1   4  176.53   27.88
  -1  11   5    9.76   10.27
 -10  -1   5    5.51    9.77
  11 -10   5    9.09    8.81
   1 -11   5   -8.83   13.94
 -10  -1   5   13.26   10.58
  -1  11   6   98.31   26.02
 -10  -1   6  138.36   28.67
  11 -10   6   82.31   18.44
   1 -11   6  103.51   26.43
 -10  -1   6   96.88   24.10
 -10  -1   7   96.27   23.91
  11 -10   7  114.47   21.54
   1 -11   7  141.01   30.50
 -10  -1   7  128.53   28.25
  -1  11   7  121.07   29.91
   1 -11   8   95.87   26.65
 -10  -1   8  152.29   32.18
  -1  11   8   81.41   25.57
   1 -11   9   12.11   13.24
  -1  11   9   13.36   12.40
 -10  -1   9   18.71   14.33
   1 -11  10   10.18   14.34
  -1  11  10   25.68   19.11
 -10  -1  10    3.72    9.83
   1 -11  11   38.02   21.41
  -1  11  11   32.57   22.24
 -10  -1  11   18.35   15.94
  -1  11  12   17.59   19.73
   2 -11 -12    3.03    9.52
  11  -9 -11   13.61   13.87
  -9  -2 -11   14.21   12.59
   2 -11 -11   33.52   15.75
 -11   9 -11   34.57   22.06
 -11   9 -10  -10.48   11.87
  11  -9 -10   14.81   14.81
   2 -11 -10   17.78   11.46
  -9  -2 -10   29.48   17.99
 -11   9 -10    8.42   16.62
  11  -9  -9   21.55   18.47
   2 -11  -9   15.52   11.88
  -9  -2  -9   15.32   14.96
 -11   9  -9   49.81   25.40
 -11   9  -9    9.72   11.90
  11  -9  -8   40.59   18.89
   2 -11  -8   62.80   19.26
  -9  -2  -8   41.50   20.53
 -11   9  -8   86.52   25.16
  11  -9  -7   22.63   17.11
   2 -11  -7   10.32   11.06
  -9  -2  -7  -10.43   15.54
 -11   9  -7   26.69   15.84
  11  -9  -6   19.35   14.34
   2 -11  -6    4.00    9.69
  -9  -2  -6  -15.19   19.27
 -11   9  -6  -28.61   16.30
  11  -9  -5  291.15   39.99
   2 -11  -5  297.66   35.39
  -9  -2  -5  245.63   43.01
 -11   9  -5  274.40   42.41
   2 -11  -4  303.16   34.89
  11  -9  -4  237.35   35.29
  -9  -2  -4  331.13   49.43
 -11   9  -4  300.59   44.80
  11  -9  -3  134.84   25.97
   2 -11  -3  146.63   24.37
  -9  -2  -3  207.03   39.66
 -11   9  -3  133.50   30.68
  -2  11  -2  221.14   34.33
  11  -9  -2  180.44   28.33
  -9  -2  -2  261.14   42.70
   2 -11  -2  175.64   26.32
  -9  -2  -2  157.88   15.68
 -11   9  -2  184.38   34.98
  -2  11  -1   47.78   17.96
  11  -9  -1   50.92   18.71
  -9  -2  -1   -2.16   13.53
   2 -11  -1   18.14   11.74
   2 -11  -1   25.72   12.96
  -9  -2  -1   37.09    9.27
 -11   9  -1   48.04   19.33
  -2  11   0   94.06   21.98
   2 -11   0  125.06   23.93
  11  -9   0   76.46   18.94
  -9  -2   0  132.11   31.54
  -9  -2   0   73.21   14.59
 -11   9   0   78.11   22.98
  11  -9   1   67.57   17.26
  -9  -2   1   44.75   18.66
  -2  11   1   48.53   15.94
   2 -11   1   42.78   14.44
  -9  -2   1   34.47   10.78
 -11   9   1   48.31   20.48
  11  -9   2  136.89   22.22
  -9  -2   2  211.73   38.44
  -2  11   2  142.73   22.51
  -2  11   2  143.85   23.94
   2 -11   2  160.01   26.87
  -9  -2   2  132.45   21.94
 -11   9   2  153.63   30.73
  11  -9   3  147.82   23.22
  -9  -2   3  169.23   34.32
   2 -11   3  183.81   30.47
 -11   9   3  142.96   20.93
  -2  11   3  140.19   24.83
  -9  -2   3  152.39   25.04
 -11   9   3  144.02   30.04
 -11   9   4  225.01   36.60
  -9  -2   4  245.54   39.57
  11  -9   4  254.97   28.08
   2 -11   4  259.43   35.83
  -2  11   4  254.52   35.23
  -9  -2   4  244.35   32.95
  -9  -2   5  253.09   39.18
  11  -9   5  241.71   27.85
   2 -11   5  227.89   34.94
  -2  11   5  206.44   34.13
  -9  -2   5  285.07   37.07
  -9  -2   6   10.96   10.52
  11  -9   6    9.44    7.23
   2 -11   6   -2.90   12.10
  -2  11   6  -26.41   15.67
  -9  -2   6  -13.42   14.17
  -9  -2   7    4.80    7.51
   2 -11   7   14.21   13.78
  -2  11   7   -1.13   10.74
  -9  -2   7   11.76    9.88
  -9  -2   8   30.88   12.45
   2 -11   8   63.99   22.61
  -2  11   8   70.35   23.92
  -9  -2   8   71.78   23.26
  -2  11   9   25.88   19.45
   2 -11   9   47.03   20.66
  -9  -2   9   -7.37   14.58
  -2  11  10   29.18   20.57
   2 -11  10   20.19   19.22
  -9  -2  10   43.70   18.75
   2 -11  11   29.80   19.15
  -9  -2  11    9.91   14.80
   9   2  11    7.95   11.27
   2 -11  12    0.40   10.48
   3 -11 -13  -24.02   15.86
  11  -8 -12   26.91   21.13
   3 -11 -12   -8.40   13.48
 -11   8 -12   -4.18   16.74
  11  -8 -11  107.71   33.27
   3 -11 -11   89.53   25.09
  -8  -3 -11  110.96   31.08
   8   3 -11   85.56   22.16
 -11   8 -11   84.65   26.18
  11  -8 -10   12.58   13.26
  -8  -3 -10   -1.60   10.74
   3 -11 -10   14.86   13.78
   8   3 -10    5.91    8.92
 -11   8 -10   19.74   15.27
  11  -8  -9    9.84   16.44
  -8  -3  -9  -36.64   20.15
   3 -11  -9    7.19   14.90
   8   3  -9   -9.31   10.47
 -11   8  -9    1.06   12.73
  11  -8  -8  105.05   28.95
   3 -11  -8  182.72   31.40
  -8  -3  -8  163.65   36.53
   8   3  -8  149.87   27.77
 -11   8  -8  112.25   28.49
  11  -8  -7  146.39   33.19
   3 -11  -7  114.31   25.10
  -8  -3  -7   92.45   27.81
 -11   8  -7  111.82   29.44
  11  -8  -6   36.89   20.61
   3 -11  -6    8.97   11.69
  -8  -3  -6   16.29   16.19
 -11   8  -6   24.82   18.46
  11  -8  -5   48.49   18.28
   3 -11  -5   29.60   15.39
  -8  -3  -5    4.09   12.91
 -11   8  -5   65.43   22.86
  11  -8  -4   92.89   25.16
   3 -11  -4   63.33   17.12
  -8  -3  -4   63.69   22.88
 -11   8  -4   41.64   17.70
  11  -8  -3   29.71   15.44
  -8  -3  -3   48.92   21.01
   3 -11  -3   26.68   12.97
  -8  -3  -3   43.27    8.49
 -11   8  -3   65.56   22.98
  11  -8  -2  210.11   29.91
  -8  -3  -2  193.31   36.78
   3 -11  -2  183.81   27.30
  -8  -3  -2  184.38   19.31
 -11   8  -2  218.70   37.67
  11  -8  -1  424.11   40.34
   3 -11  -1  446.29   40.57
 -11   8  -1  438.07   50.78
  -8  -3  -1  415.44   31.45
  -8  -3  -1  476.93   56.34
  -3  11   0  147.18   25.47
  11  -8   0  148.56   23.75
  -8  -3   0  131.50   31.39
   3 -11   0  114.24   20.63
   3 -11   0  131.68   23.36
  -8  -3   0  107.71   17.65
 -11   8   0  111.69   26.64
  11  -8   1  487.58   39.06
  -3  11   1  422.86   41.04
   3 -11   1  422.36   40.99
 -11   8   1  423.67   50.00
  -8  -3   1  425.28   36.80
  -8  -3   1  454.47   54.14
  11  -8   2  238.67   26.74
  -8  -3   2  187.52   35.82
  -3  11   2  204.44   27.06
   3 -11   2  208.89   30.51
  -8  -3   2  205.54   27.42
 -11   8   2  221.52   36.13
  -8  -3   3   41.61   18.77
  11  -8   3   51.23   13.82
  -3  11   3   80.09   17.07
   3 -11   3   52.19   17.22
  -8  -3   3   46.83   15.04
 -11   8   3   59.55   21.02
  -8  -3   4   68.88   21.17
  11  -8   4   65.20   13.69
   3 -11   4   49.55   17.46
  -8  -3   4   50.62   16.85
 -11   8   4   38.03   16.66
  -8  -3   5   31.25   15.15
  11  -8   5   72.98   13.98
   3 -11   5   37.99   14.07
  -8  -3   5   58.71   16.94
 -11   8   5   28.72   12.76
 -11   8   6    4.07    7.26
  -8  -3   6   -1.64    9.54
   3 -11   6    2.14   10.63
  -8  -3   6   -4.92    8.64
  -8  -3   7   88.47   21.84
   3 -11   7  104.47   26.36
  -8  -3   7   85.89   23.56
  -8  -3   8  140.40   27.26
   3 -11   8  158.64   32.45
  -8  -3   8  139.29   30.97
   3 -11   9   -1.32   11.54
  -8  -3   9   27.58   16.70
  -8  -3  10   21.19   17.28
   8   3  10   -1.47   11.65
  11  -8  11  108.44   29.56
   3 -11  11  114.87   32.12
   8   3  11   96.38   33.80
  -8  -3  11   45.45   22.74
   3 -11  12   34.51   19.72
  -8  -3  12   11.73   16.48
   8   3  12   16.14   17.97
   4 -11 -13   -6.64   13.19
  11  -7 -12  -19.29   20.56
   4 -11 -12   30.24   19.95
   7   4 -12   -2.41    9.06
  11  -7 -11   84.45   29.05
   4 -11 -11  119.50   29.38
   7   4 -11   94.68   25.00
  -7  -4 -11   45.75   20.97
 -11   7 -11   61.99   23.84
  11  -7 -10   24.14   17.09
  -7  -4 -10   46.02   20.33
   7   4 -10    0.04    7.27
   4 -11 -10   -0.46   13.21
 -11   7 -10   25.94   16.13
  11  -7  -9   97.62   29.68
   4 -11  -9  125.52   28.31
  -7  -4  -9  111.81   30.72
   7   4  -9  162.98   30.70
 -11   7  -9  146.78   33.31
  11  -7  -8   91.61   27.59
   4 -11  -8  102.57   25.43
  -7  -4  -8  120.60   31.24
   7   4  -8  108.16   25.25
 -11   7  -8   93.62   25.91
   4 -11  -7  430.74   45.97
  11  -7  -7  355.97   47.76
   7   4  -7  388.88   43.57
  -7  -4  -7  328.31   50.75
 -11   7  -7  445.46   54.21
  11  -7  -6   36.70   18.80
  -7  -4  -6   73.01   24.20
   4 -11  -6   73.89   20.15
   7   4  -6   53.79   17.48
 -11   7  -6   69.41   22.94
  11  -7  -5    7.85   10.26
  -7  -4  -5   25.70   17.96
   4 -11  -5   14.31   14.03
   7   4  -5   41.84   16.31
 -11   7  -5    7.23   11.36
  11  -7  -4  185.85   31.13
   4 -11  -4  178.97   28.99
  -7  -4  -4  199.01   18.19
  -7  -4  -4  180.09   35.11
 -11   7  -4  137.48   29.84
  11  -7  -3   82.44   21.81
   4 -11  -3   54.71   16.74
  -7  -4  -3   68.49   11.65
 -11   7  -3   37.65   18.62
  -7  -4  -3   63.45   21.82
  11  -7  -2  204.66   29.06
  -7  -4  -2  231.52   40.35
   4 -11  -2  230.65   30.10
  -7  -4  -2  227.89   22.76
 -11   7  -2  301.10   42.80
  11  -7  -1  223.49   29.11
   4 -11  -1  166.49   25.07
  -7  -4  -1  229.06   24.61
 -11   7  -1  235.33   38.28
  -7  -4  -1  253.87   40.63
  11  -7   0   67.97   16.49
   4 -11   0   51.90   15.40
  -7  -4   0   22.09   15.31
  -7  -4   0   28.42   10.52
 -11   7   0   21.48   11.92
  -7  -4   1  233.04   38.63
  -4  11   1  197.26   28.30
  11  -7   1  198.86   24.37
   4 -11   1  186.56   27.63
  -7  -4   1  212.27   27.13
 -11   7   1  188.41   32.98
  11  -7   2  192.06   23.73
  -7  -4   2  196.17   35.62
  -4  11   2  166.31   24.32
   4 -11   2  179.14   27.30
  -7  -4   2  188.54   26.82
 -11   7   2  216.97   35.70
  -7  -4   3   27.48   16.12
  11  -7   3   72.90   14.48
  -4  11   3   48.73   13.12
   4 -11   3   41.39   14.77
  -7  -4   3   49.72   15.39
 -11   7   3   34.43   16.95
  -7  -4   4  174.35   34.08
  11  -7   4  175.80   19.17
   4 -11   4  159.14   26.57
  -7  -4   4  171.36   28.53
 -11   7   4  146.63   29.05
  -7  -4   5   58.53   20.46
  11  -7   5   27.78    8.64
   4 -11   5   23.82   12.46
  -7  -4   5   23.75   12.53
 -11   7   5   43.09   17.01
  -7  -4   6   70.76   21.28
   4 -11   6   72.16   19.83
  -7  -4   6   76.68   22.47
 -11   7   6   82.22   21.89
   4 -11   7  401.67   46.51
 -11   7   7  361.34   42.96
  -7  -4   7  430.58   49.67
  -7  -4   7  406.38   47.09
  -7  -4   8  118.18   25.02
   4 -11   8  136.52   28.79
  -7  -4   8   87.53   24.42
   7   4   9  149.39   37.76
   4 -11   9  108.10   28.30
  -7  -4   9   98.27   27.48
   4 -11  10   21.66   14.25
  -7  -4  10    2.76   12.27
   7   4  10    8.18   13.08
   7   4  11   61.22   26.94
   4 -11  11   84.24   28.48
  -7  -4  11   55.21   24.20
   7   4  12   48.13   25.44
   4 -11  12   52.83   23.63
  -7  -4  12   28.00   20.18
  11  -7  12    5.62   10.93
   4 -11  13   16.15   16.11
   5 -11 -13   20.61   18.14
   6   5 -13    5.62    9.20
  11  -6 -12   67.15   30.91
   5 -11 -12   43.39   21.88
   6   5 -12   46.33   19.30
  11  -6 -11    9.21   12.19
   5 -11 -11   -9.49   15.18
   6   5 -11   27.36   17.26
  -6  -5 -11   39.41   17.82
 -11   6 -11   -2.85   11.94
   5 -11 -10   -3.98   13.43
  11  -6 -10   11.51   15.01
  -6  -5 -10    7.28   13.33
   6   5 -10   16.21   12.66
 -11   6 -10   23.87   17.38
  11  -6  -9   18.44   14.72
   5 -11  -9   21.63   17.16
  -6  -5  -9   32.16   20.95
   6   5  -9   24.93   15.01
 -11   6  -9   15.50   14.52
  11  -6  -8   61.07   20.88
   5 -11  -8   67.04   22.10
  -6  -5  -8   46.31   21.97
   6   5  -8   66.37   19.95
 -11   6  -8  107.68   28.58
  11  -6  -7  100.89   28.09
   5 -11  -7  120.45   27.16
   6   5  -7   95.07   23.53
 -11   6  -7   86.67   25.08
  -6  -5  -7   93.18   28.62
  11  -6  -6   -2.18   10.94
  -6  -5  -6    5.54   13.22
   5 -11  -6    1.58   12.14
   6   5  -6   -5.77   10.43
 -11   6  -6    1.59    9.36
  11  -6  -5   28.93   15.18
  -6  -5  -5    9.52   14.48
   5 -11  -5   41.12   16.36
   6   5  -5   14.69   11.84
  -6  -5  -5   30.54    7.79
 -11   6  -5   11.58   11.87
  11  -6  -4   40.02   15.73
  -6  -5  -4   14.06   14.13
   5 -11  -4   61.50   19.94
   6   5  -4   54.08   18.16
  -6  -5  -4   42.18   10.09
 -11   6  -4   49.44   20.33
  11  -6  -3   80.94   20.30
  -6  -5  -3  128.34   28.78
   5 -11  -3  106.10   22.28
  -6  -5  -3   80.04   13.32
 -11   6  -3   73.90   22.73
   5 -11  -2  257.34   32.12
  -6  -5  -2  254.29   41.60
  -6  -5  -2  259.11   25.49
 -11   6  -2  253.28   39.08
  11  -6  -2  308.55   34.74
  -6  -5  -1  152.46   31.93
  11  -6  -1  118.36   21.36
   5 -11  -1  148.60   25.02
  -6  -5  -1  154.10   21.03
 -11   6  -1  152.50   30.14
  11  -6   0  545.18   40.47
   5 -11   0  630.00   48.07
  -6  -5   0  594.14   42.61
 -11   6   0  512.36   54.03
  -6  -5   0  486.00   55.38
  -6  -5   1  164.81   32.42
  11  -6   1  154.09   20.59
  -6  -5   1  201.83   26.49
 -11   6   1  121.93   26.26
   5 -11   1   90.17   19.72
  -5  11   2  239.59   28.31
  11  -6   2  239.43   23.58
  -6  -5   2  264.66   42.16
   5 -11   2  225.94   30.90
  -6  -5   2  242.00   30.54
 -11   6   2  211.33   34.46
  -6  -5   3   99.54   25.95
  11  -6   3  100.83   14.89
  -5  11   3  110.72   18.17
   5 -11   3  114.32   22.26
  -6  -5   3  115.10   22.74
 -11   6   3   97.51   24.38
  11  -6   4   72.99   10.90
   5 -11   4   48.66   17.09
  -5  11   4   40.13   10.86
  -6  -5   4   66.52   22.31
  -6  -5   4   16.93   12.80
 -11   6   4   33.93   15.40
  -6  -5   5   29.72   16.12
   5 -11   5   34.90   14.06
  -6  -5   5   36.06   16.17
 -11   6   5    9.40    9.46
  -6  -5   6    7.63    8.96
   5 -11   6    7.25   10.49
  -6  -5   6   -1.33    9.48
 -11   6   6    1.31    7.50
  -6  -5   7  102.71   24.76
   5 -11   7  108.09   25.63
  -6  -5   7  114.96   28.44
 -11   6   7  104.93   23.82
  -6  -5   8  113.94   24.68
   6   5   8   72.17   26.72
   5 -11   8  110.63   26.21
  -6  -5   8  114.88   28.13
 -11   6   8   83.59   20.62
   6   5   9    5.20   11.73
   5 -11   9   -8.36   11.68
  -6  -5   9    0.05    8.13
   6   5  10    8.68   13.33
   5 -11  10    8.62   10.94
  -6  -5  10    9.88   13.67
   6   5  11    6.26   12.23
   5 -11  11   26.96   15.98
  -6  -5  11   55.27   21.66
   6   5  12   17.74   18.19
  11  -6  12   20.44   13.63
   5 -11  12   28.88   17.60
  -6  -5  12   18.37   18.09
  11  -6  13   -4.77   10.29
   5 -11  13   10.07   13.51
   5   6 -13    9.83   15.05
   6 -11 -13    7.36   13.39
   6 -11 -12  -30.82   20.92
   5   6 -12   -0.52    9.79
  11  -5 -11    4.52   16.40
   6 -11 -11   -6.63   15.66
   5   6 -11    0.05   13.74
  -5  -6 -11   24.67   16.05
 -11   5 -11   10.78   13.65
  11  -5 -10   95.24   31.26
  -5  -6 -10   94.45   29.04
   6 -11 -10   23.14   17.81
   5   6 -10  139.80   31.12
 -11   5 -10  100.26   28.64
   6 -11  -9   44.25   18.80
  -5  -6  -9   19.49   16.20
   5   6  -9   35.47   16.24
  11  -5  -9   32.08   19.97
 -11   5  -9   30.49   15.01
  11  -5  -8   26.72   15.05
  -5  -6  -8   12.61   11.73
   5   6  -8   62.18   20.65
   6 -11  -8   32.44   19.27
 -11   5  -8   61.47   21.44
  11  -5  -7   80.67   24.94
  -5  -6  -7   33.47   17.73
   6 -11  -7   61.27   20.86
   5   6  -7   47.80   18.43
 -11   5  -7   47.96   19.91
  11  -5  -6   14.69   13.23
  -5  -6  -6   38.80   19.15
   6 -11  -6   30.03   17.34
   5   6  -6   22.77   13.85
 -11   5  -6   25.86   15.44
  -5  -6  -6   18.24    7.56
  11  -5  -5  149.01   29.77
  -5  -6  -5  122.69   30.47
   5   6  -5  141.34   26.12
   6 -11  -5  147.91   28.37
  -5  -6  -5  146.69   18.25
 -11   5  -5  133.81   29.66
  11  -5  -4   42.67   15.48
  -5  -6  -4   43.69   19.30
   6 -11  -4   46.95   17.49
   5   6  -4   36.91   14.59
  -5  -6  -4   46.20   10.93
 -11   5  -4   10.03   13.58
   6 -11  -3  308.29   36.61
  -5  -6  -3  326.12   47.46
  -5  -6  -3  300.41   27.55
   5   6  -3  297.33   36.19
 -11   5  -3  257.77   39.72
  11  -5  -3  308.85   37.36
   6 -11  -2 1052.92   63.26
 -11   5  -2  976.88   75.26
  -5  -6  -2 1032.35   51.98
  -5  -6  -2 1020.51   82.14
  11  -5  -2  998.46   61.34
  -5  -6  -1   95.25   26.56
  11  -5  -1  137.47   21.74
   6 -11  -1  159.79   26.15
  -5  -6  -1  121.54   19.07
 -11   5  -1  110.60   26.41
  -5  -6   0   -9.65   11.99
  11  -5   0    7.81    8.92
   6 -11   0  -16.15   14.51
  -5  -6   0   -1.98    8.30
 -11   5   0   -1.14   14.71
   6 -11   0   14.76    7.14
  -5  -6   1  115.93   29.05
  11  -5   1  134.12   18.79
   6 -11   1  113.88   21.68
  -5  -6   1  140.15   23.15
 -11   5   1  146.70   29.46
  11  -5   2 1086.86   45.89
 -11   5   2  993.87   73.31
   6 -11   2 1016.55   61.69
   6 -11   2 1154.60   65.55
  -5  -6   2 1129.31   64.82
  -5  -6   2 1119.63   82.06
  -5  -6   3  343.13   46.62
  -6  11   3  284.95   27.75
  11  -5   3  261.87   20.90
   6 -11   3  367.39   38.21
  -5  -6   3  308.33   35.79
 -11   5   3  258.08   36.94
  -5  -6   4   53.34   21.37
  -6  11   4   41.54   10.52
   6 -11   4   28.43   12.31
  -5  -6   4   45.73   17.33
 -11   5   4   52.59   18.32
  -5  -6   5  166.16   32.30
   6 -11   5  162.44   28.00
  -5  -6   5  140.20   27.04
 -11   5   5  131.73   26.18
  -5  -6   6    9.01   11.24
   6 -11   6   23.40   12.31
  -5  -6   6   21.88   13.99
 -11   5   6   32.48   13.13
  -5  -6   7   72.91   23.91
   5   6   7   58.10   23.96
   6 -11   7   80.21   22.24
  -5  -6   7   59.12   20.25
 -11   5   7   71.62   18.16
  -5  -6   8   35.40   15.88
   6 -11   8   25.43   12.23
  -5  -6   8   35.60   16.21
 -11   5   8   36.48   13.51
   5   6   8   13.73   14.29
   5   6   9   32.18   19.65
   6 -11   9   31.73   15.33
  -5  -6   9   38.19   18.44
   5   6  10   30.40   21.70
   6 -11  10   78.10   24.09
  -5  -6  10  101.02   29.54
   5   6  11  -27.96   19.69
   6 -11  11  -12.94   13.51
  -5  -6  11    1.96   12.42
  11  -5  12   36.47   20.10
   6 -11  12   10.29   13.04
  -5  -6  12   21.47   16.32
   5   6  12   -0.34   12.27
  11  -5  13   19.11   16.54
   6 -11  13   20.21   18.12
   6 -11  14   21.73   18.28
   4   7 -13   15.78   14.79
  11  -4 -12    1.13   13.63
   7 -11 -12   15.28   14.10
   4   7 -12   22.04   16.00
  -7  11 -12   -8.20   18.64
  11  -4 -11   48.20   24.08
   4   7 -11   29.13   17.57
  -7  11 -11   16.21   18.01
   7 -11 -11   37.24   21.24
 -11   4 -11   45.76   19.25
  -4  -7 -11   54.30   22.89
  11  -4 -10   36.28   20.17
   7 -11 -10   26.05   19.13
  -4  -7 -10   56.52   22.57
  -7  11 -10   69.58   26.92
   4   7 -10   52.30   20.41
 -11   4 -10   52.11   22.25
  -4  -7  -9   -6.70   13.20
   7 -11  -9   -8.48   15.88
  -7  11  -9    7.50   14.43
   4   7  -9   -2.27   13.86
  11  -4  -9  -12.87   14.39
 -11   4  -9   -5.86   10.83
  11  -4  -8   47.01   21.37
  -4  -7  -8   -8.34   13.60
   7 -11  -8   26.00   15.11
  -7  11  -8   68.73   25.23
   4   7  -8   29.37   16.07
 -11   4  -8   25.43   12.76
  11  -4  -7  269.99   42.29
  -4  -7  -7  250.29   44.61
   7 -11  -7  213.67   36.87
  -7  11  -7  223.99   42.45
   4   7  -7  230.84   37.13
 -11   4  -7  216.50   39.55
  11  -4  -6    6.67   11.16
  -4  -7  -6   25.54   18.72
   7 -11  -6   12.18   12.61
  -7  11  -6   11.25   11.54
   4   7  -6   15.42   13.18
  -4  -7  -6    8.46    5.86
 -11   4  -6    3.26   10.07
  11  -4  -5  142.97   29.82
  -4  -7  -5   93.88   28.64
   7 -11  -5   85.77   23.03
   4   7  -5  106.75   23.79
  -4  -7  -5   85.01   15.83
  -7  11  -5  106.50   28.56
 -11   4  -5   80.49   24.56
  11  -4  -4    1.81   10.64
  -4  -7  -4   -2.09   12.27
   7 -11  -4    6.42   13.64
   4   7  -4   15.98   13.89
  -4  -7  -4   22.00    9.45
  -7  11  -4    5.56   11.10
 -11   4  -4   24.07   15.43
  -4  -7  -3   23.42   15.91
  11  -4  -3   17.89   11.72
   7 -11  -3    4.97   10.36
   4   7  -3   15.88   13.41
  -4  -7  -3   18.66    9.30
 -11   4  -3   -2.51   11.95
  11  -4  -2   64.16   17.09
   7 -11  -2   63.24   19.52
  -4  -7  -2   43.11   19.63
   4   7  -2   46.79   15.93
  -4  -7  -2   39.02   11.40
 -11   4  -2   36.04   18.48
  -4  -7  -1  271.17   43.22
   4   7  -1  303.84   36.53
   7 -11  -1  260.14   32.55
  -4  -7  -1  293.13   30.53
 -11   4  -1  232.83   38.27
  11  -4  -1  245.50   28.53
 -11   4   0  371.20   46.42
  -4  -7   0  384.54   36.34
   7 -11   0  393.27   39.61
  -4  -7   0  425.86   52.04
  11  -4   0  447.55   34.49
  11  -4   1  279.76   24.73
  -4  -7   1  302.45   44.22
   7 -11   1  206.61   27.95
  -4  -7   1  224.21   29.33
 -11   4   1  208.91   34.57
  -4  -7   2   97.03   26.76
  11  -4   2   77.76   12.00
   7 -11   2   44.05   15.17
  -4  -7   2   74.11   17.85
 -11   4   2   49.44   18.79
  -4  -7   3    3.06   10.61
  -7  11   3    8.35    6.36
  11  -4   3    7.34    4.19
   7 -11   3    6.44   10.94
  -4  -7   3   -7.73   10.04
 -11   4   3   23.37   15.53
  -4  -7   4   25.74   15.76
  -7  11   4   18.91    6.86
   7 -11   4   35.03   14.32
  -4  -7   4   19.40   11.49
 -11   4   4   27.45   13.37
  -4  -7   5   99.14   24.59
   7 -11   5  108.97   22.07
  -4  -7   5  169.94   31.06
 -11   4   5   86.74   21.31
  -4  -7   6    5.78   10.28
   7 -11   6    1.31    8.76
  -4  -7   6   24.48   14.67
 -11   4   6    7.14    8.71
   4   7   6   13.21   12.12
  -4  -7   7  257.06   39.16
   4   7   7  259.99   43.65
   7 -11   7  284.65   38.43
  -4  -7   7  287.47   41.07
 -11   4   7  268.45   36.47
  -4  -7   8   31.06   15.31
   7 -11   8   35.77   16.06
  -4  -7   8   48.30   18.91
 -11   4   8   38.35   14.01
   4   7   8   30.12   17.43
   4   7   9   27.62   17.54
   7 -11   9   26.89   15.51
  -4  -7   9   10.64   10.95
   4   7  10    9.14   10.58
   7 -11  10   12.24   12.41
   7 -11  11   54.12   22.48
  -4  -7  11   25.59   15.88
   4   7  11    1.38   13.58
   4   7  12    4.38   13.96
   7 -11  12   24.74   17.19
  11  -4  12   32.44   20.97
  -4  -7  12   -3.21   12.01
  11  -4  13   37.54   21.80
   7 -11  13   -2.16    9.96
   3   8 -13   -0.14   12.32
  11  -3 -12    0.73   11.51
   8 -11 -12  -19.41   19.09
  -8  11 -12   26.94   24.86
   3   8 -12   -9.80   14.72
  11  -3 -11    8.09   11.76
  -8  11 -11    6.51   18.32
   8 -11 -11   16.31   16.84
   3   8 -11  -10.41   14.36
  -3  -8 -11    8.61   11.58
 -11   3 -11   -2.71    8.49
  11  -3 -10   34.86   19.93
  -8  11 -10  103.91   35.13
  -3  -8 -10   44.29   21.12
   8 -11 -10   38.05   21.78
   3   8 -10   46.22   20.85
 -11   3 -10   32.96   19.25
  11  -3  -9   28.06   18.62
  -8  11  -9   15.88   20.00
  -3  -8  -9   34.43   19.39
   8 -11  -9    6.59   13.81
   3   8  -9   17.32   15.12
 -11   3  -9   20.43   16.32
  11  -3  -8   47.25   20.65
  -3  -8  -8   35.57   20.25
  -8  11  -8   26.29   20.68
   8 -11  -8   51.46   21.88
   3   8  -8   38.72   19.10
 -11   3  -8   39.97   19.37
  -3  -8  -7   69.47   24.77
  -8  11  -7   45.41   22.33
  11  -3  -7   51.20   18.77
   8 -11  -7  102.82   25.68
   3   8  -7   65.00   23.20
  -3  -8  -7   64.53   14.07
 -11   3  -7   61.92   22.83
  -8  11  -6   43.55   21.98
   8 -11  -6   60.50   21.19
   3   8  -6   86.03   22.87
  -3  -8  -6   71.48   14.25
 -11   3  -6   57.94   21.85
  -3  -8  -6  103.68   30.88
  11  -3  -6   58.55   19.84
  -3  -8  -5  191.70   38.81
  -8  11  -5  127.43   30.56
   3   8  -5  142.49   28.42
  -3  -8  -5  160.67   20.73
  11  -3  -5  166.25   31.91
 -11   3  -5  146.64   32.94
   8 -11  -5  105.67   25.92
  -3  -8  -4  265.81   43.99
  11  -3  -4  310.62   40.21
  -8  11  -4  253.34   40.71
   8 -11  -4  201.65   32.00
   3   8  -4  213.30   34.11
  -3  -8  -4  197.70   25.52
 -11   3  -4  218.03   38.66
  11  -3  -3  173.23   28.63
  -8  11  -3  142.09   30.11
   8 -11  -3  135.25   27.78
   3   8  -3  164.94   29.33
  -3  -8  -3  139.70   21.09
 -11   3  -3  163.42   33.64
  11  -3  -2   27.42   11.06
  -8  11  -2    7.69    7.31
   8 -11  -2   24.60   14.06
   3   8  -2    8.65    9.18
  -3  -8  -2   21.68   10.25
 -11   3  -2   29.15   17.36
   8 -11  -1  295.46   35.40
   3   8  -1  286.32   35.93
  -3  -8  -1  282.14   30.76
 -11   3  -1  207.58   36.95
  11  -3  -1  275.09   30.10
  11  -3   0   48.44   12.29
   8 -11   0   49.37   17.14
  -3  -8   0   31.18   12.21
 -11   3   0   40.27   19.54
   8 -11   1  318.99   35.14
  -3  -8   1  346.45   36.56
 -11   3   1  286.27   40.64
  11  -3   1  294.09   24.10
  11  -3   2   33.25    7.64
   8 -11   2   37.60   12.71
  -3  -8   2   28.17   13.76
 -11   3   2   22.73   13.44
   8 -11   3  163.75   26.18
  -3  -8   3  123.87   24.41
 -11   3   3  168.62   31.56
   3   8   4  143.10   29.24
   8 -11   4  209.54   29.84
  -3  -8   4  140.79   26.82
 -11   3   4  226.04   35.69
   8 -11   5  179.73   29.02
  -3  -8   5  156.88   28.52
 -11   3   5  130.77   26.80
   3   8   5  137.37   30.42
   3   8   6   34.84   15.69
   8 -11   6   53.44   16.25
 -11   3   6   31.44   14.54
   8 -11   7   53.99   18.50
   3   8   7   83.06   25.68
  -3  -8   7   88.28   22.85
 -11   3   7   66.07   19.27
  -3  -8   7   72.67   21.18
  -3  -8   8   66.86   21.26
   3   8   8   39.85   20.53
   8 -11   8   54.16   19.23
  -3  -8   8   76.86   23.78
 -11   3   8   67.93   18.44
   8 -11   9   14.46   12.47
  -3  -8   9   14.63   13.86
   3   8   9   15.72   16.08
   8 -11  10   90.87   25.48
  -3  -8  10   75.16   25.92
   3   8  10   45.16   26.05
   3   8  11    7.67   18.61
   8 -11  11   11.93   10.54
  -3  -8  11    7.85   11.08
  11  -3  12   24.13   20.93
   3   8  12   57.27   29.57
  -3  -8  12    0.07   11.42
  11  -2 -12   24.70   21.04
  11  -2 -11    6.82   12.76
  -9  11 -11   39.39   19.91
  -2  -9 -11   42.65   19.43
   9 -11 -11   22.26   19.04
 -11   2 -11   18.94   17.39
  11  -2 -10   68.76   28.06
  -9  11 -10  147.78   40.20
  -2  -9 -10   69.00   27.14
   9 -11 -10  105.85   30.38
 -11   2 -10  107.75   30.88
  11  -2  -9   61.48   22.68
  -9  11  -9   19.86   17.70
   2   9  -9   38.86   19.26
  -2  -9  -9   37.09   21.58
   9 -11  -9   26.33   19.13
 -11   2  -9   85.47   27.77
  11  -2  -8   33.61   17.83
  -9  11  -8   11.57   16.80
   9 -11  -8   65.17   21.77
   2   9  -8   52.68   18.82
  -2  -9  -8   68.09   17.00
 -11   2  -8   30.88   18.78
  -2  -9  -8   44.56   20.66
  -9  11  -7   87.63   29.89
  11  -2  -7   54.85   20.32
  -2  -9  -7   70.97   24.66
   9 -11  -7   45.81   19.37
   2   9  -7   67.96   22.44
  -2  -9  -7  128.56   20.98
 -11   2  -7   49.40   22.37
  11  -2  -6  108.18   28.37
   9 -11  -6   46.37   19.61
   2   9  -6   85.45   25.55
  -2  -9  -6  100.29   18.31
 -11   2  -6   91.96   29.13
  -2  -9  -6  120.09   32.33
  -9  11  -6   90.63   28.76
  -9  11  -5  319.05   48.39
  11  -2  -5  344.75   45.62
   2   9  -5  371.98   47.26
  -2  -9  -5  351.48   33.18
   9 -11  -5  327.71   42.34
 -11   2  -5  293.62   47.31
  -9  11  -4   69.81   22.96
  11  -2  -4   72.83   21.33
   2   9  -4   79.44   22.02
  -2  -9  -4  146.40   23.19
 -11   2  -4  111.89   29.84
   9 -11  -4   95.28   24.33
  11  -2  -3  162.52   28.24
  -9  11  -3  151.54   31.15
   9 -11  -3  192.53   31.52
   2   9  -3  165.23   30.32
  -2  -9  -3  181.97   25.70
 -11   2  -3  118.85   30.55
  -9  11  -2  282.77   39.51
   9 -11  -2  303.59   36.46
   2   9  -2  341.62   40.78
  -2  -9  -2  272.97   30.94
 -11   2  -2  305.23   46.35
  11  -2  -2  324.54   36.69
  11  -2  -1   78.95   16.73
  -9  11  -1   75.52   21.59
   9 -11  -1   58.77   18.66
   2   9  -1   77.04   21.70
  -2  -9  -1   78.41   18.97
 -11   2  -1   72.91   24.88
  11  -2   0   24.96    9.26
  -9  11   0   28.96   14.02
   9 -11   0   20.01   14.21
  -2  -9   0   24.41   13.57
   2   9   0   36.28   15.32
 -11   2   0   23.20   15.73
  11  -2   1   66.51   11.73
   9 -11   1   38.26   14.72
  -2  -9   1   39.18   15.14
 -11   2   1   49.03   19.74
   9 -11   2  295.08   33.96
  -2  -9   2  287.63   35.33
 -11   2   2  254.53   40.18
   2   9   2  268.14   35.49
   9 -11   3  189.28   27.96
   9 -11   3  173.42   26.62
   2   9   3  156.49   28.30
  -2  -9   3  158.80   27.52
   9 -11   4  138.25   24.41
 -11   2   4  138.00   29.48
  -2  -9   4  109.97   23.99
   2   9   4  109.61   25.81
 -11   2   5  380.44   46.48
   9 -11   5  423.85   42.41
   2   9   5  373.50   48.44
  -2  -9   5  308.53   40.33
   2   9   6   67.75   23.03
   9 -11   6   78.34   19.71
 -11   2   6   23.04   11.66
  -2  -9   6   42.53   17.27
   9 -11   7   89.16   21.76
 -11   2   7   90.82   21.48
  -2  -9   7   80.90   24.93
   2   9   7   84.67   26.96
   9 -11   8   81.85   21.79
  -2  -9   8   40.47   19.45
   2   9   8   35.92   21.44
   2   9   9   -4.11   13.68
   9 -11   9   58.62   19.08
  -2  -9   9   68.96   24.79
   2   9  10  133.36   36.54
   9 -11  10  100.46   25.93
  -2  -9  10   96.05   29.92
   2   9  11    8.78   12.62
  -2  -9  11   27.67   16.70
   2   9  12    9.42   15.27
  11  -2  12   35.25   21.85
  11  -1 -11  -33.34   20.04
 -11   1 -11  -16.67   16.46
 -10  11 -11  -22.98   18.30
  -1 -10 -10   45.45   23.74
  10 -11 -10   33.73   20.79
 -11   1 -10   54.25   22.46
 -10  11 -10   69.52   29.83
  11  -1 -10   48.57   19.49
  10 -11  -9  -17.32   21.27
  -1 -10  -9   -6.04    8.82
 -11   1  -9   18.94   16.70
  -1 -10  -9   -1.14    9.31
 -10  11  -9   11.96   14.96
  11  -1  -9    3.54   11.25
  -1 -10  -8  111.59   30.67
  10 -11  -8   74.92   23.34
  -1 -10  -8   90.24   20.50
 -11   1  -8   97.72   30.56
 -10  11  -8   22.04   14.44
  11  -1  -8  116.73   30.31
   1  10  -7   64.20   24.62
  10 -11  -7   61.68   21.52
  -1 -10  -7   30.70   12.88
 -11   1  -7   89.16   27.76
 -10  11  -7   34.38   20.68
  11  -1  -7  111.13   28.21
  10 -11  -6   79.76   22.98
   1  10  -6  105.13   28.04
  -1 -10  -6   65.22   16.46
 -11   1  -6   69.78   25.75
 -10  11  -6   58.99   24.12
  11  -1  -6  131.19   30.94
  10 -11  -5   95.01   24.65
   1  10  -5   74.65   22.74
  -1 -10  -5   60.55   16.17
 -11   1  -5  113.26   31.33
 -10  11  -5   67.09   24.34
  11  -1  -5   65.23   21.09
  11  -1  -4   42.85   17.92
  10 -11  -4   43.35   19.15
   1  10  -4   62.34   19.69
  -1 -10  -4   47.99   14.35
 -11   1  -4   54.56   23.13
 -10  11  -4   12.73   12.62
  11  -1  -3   -4.83   10.74
  10 -11  -3    6.06   12.68
   1  10  -3    0.13   12.84
  -1 -10  -3    7.89   10.19
 -11   1  -3  -24.40   18.68
 -10  11  -3   -5.20   12.91
  11  -1  -2  149.52   25.02
  10 -11  -2  218.63   32.35
   1  10  -2  161.90   29.76
  -1 -10  -2  181.01   27.51
 -11   1  -2  186.04   38.02
 -10  11  -2  209.67   35.50
  10 -11  -1  445.53   43.97
   1  10  -1  492.21   48.68
  -1 -10  -1  449.41   42.31
 -11   1  -1  389.69   52.61
   1  10  -1  401.54   32.56
 -10  11  -1  386.11   44.62
  11  -1  -1  446.75   39.59
 -11   1   0  422.70   53.70
  10 -11   0  375.86   39.72
   1  10   0  458.70   45.86
  -1 -10   0  415.75   41.49
   1  10   0  421.29   36.92
 -10  11   0  421.38   44.23
  11  -1   0  454.56   34.21
  10 -11   1  335.85   37.11
   1  10   1  356.77   40.30
  -1 -10   1  411.44   41.86
 -11   1   1  356.93   49.08
   1  10   1  328.99   35.89
 -10  11   1  326.40   36.84
  10 -11   2  184.03   27.81
   1  10   2  184.51   28.59
 -11   1   2  196.30   35.58
  -1 -10   2  129.72   25.90
   1  10   3    8.99   10.99
  10 -11   3    0.22    8.97
  10 -11   3   -3.35    8.43
 -11   1   3    4.58   12.60
  -1 -10   3    8.84   12.93
  10 -11   4   69.67   18.41
 -11   1   4   65.05   22.56
  -1 -10   4   74.71   20.69
 -11   1   4   56.47   15.95
   1  10   4   68.86   20.71
  10 -11   5   70.19   18.56
 -11   1   5  104.76   26.63
  -1 -10   5   72.16   21.51
   1  10   5   88.88   25.36
 -11   1   5  105.90   22.93
  10 -11   6   85.87   20.76
 -11   1   6   96.81   25.27
  -1 -10   6  103.24   26.23
   1  10   6   61.09   23.33
 -11   1   6   54.70   17.34
  10 -11   7   49.81   16.90
   1  10   7   53.72   24.20
 -11   1   7   40.58   16.50
  -1 -10   7   38.57   16.71
 -11   1   7   65.89   20.80
  10 -11   8   59.65   17.67
  -1 -10   8   23.47   14.55
 -11   1   8   68.90   22.02
   1  10   9   -0.36   10.98
  10 -11   9    1.21    8.03
  -1 -10   9  -24.24   17.30
 -11   1   9   -6.58   12.83
   1  10  10   18.22   17.79
  -1 -10  10   18.32   14.68
   1  10  11   24.81   26.72
  -1 -10  11    8.91   13.91
   1  10  12  -34.83   23.59
 -11   0 -11   21.03   16.01
  11   0 -11    6.10   14.68
  11 -11 -10   13.12   16.06
   0 -11 -10   44.67   23.51
 -11   0 -10   43.23   20.11
 -11  11 -10   15.12   19.40
  11   0 -10   36.03   22.37
  11 -11  -9   29.86   20.73
   0 -11  -9   53.12   17.38
 -11   0  -9   30.91   19.93
 -11  11  -9  -20.64   18.34
   0 -11  -9   75.31   27.13
  11   0  -9   40.23   20.16
  11 -11  -8   67.22   21.95
   0 -11  -8   84.04   20.05
 -11   0  -8   96.18   30.54
 -11  11  -8   77.32   28.61
  11   0  -8   34.13   17.87
  11 -11  -7  163.38   33.07
   0 -11  -7  145.45   25.55
  11   0  -7  183.09   36.51
 -11   0  -7  178.32   39.09
 -11  11  -7   97.08   30.80
   0  11  -6    2.33   10.65
  11 -11  -6   11.19   13.52
   0 -11  -6   35.03   14.36
 -11   0  -6  -15.52   21.45
 -11  11  -6   30.45   21.84
  11   0  -6   40.85   17.18
   0  11  -5  236.76   39.42
  11 -11  -5  218.46   36.65
   0 -11  -5  257.70   32.87
 -11   0  -5  250.95   47.17
 -11  11  -5  173.02   37.31
  11   0  -5  233.02   36.87
  11 -11  -4   63.20   22.96
   0  11  -4   79.79   22.93
   0 -11  -4   65.66   18.05
 -11   0  -4   29.91   20.46
 -11  11  -4   74.77   25.67
  11   0  -4   47.95   17.97
  11   0  -3  108.66   24.14
  11 -11  -3  109.22   26.87
   0  11  -3  145.41   30.45
   0 -11  -3  115.01   22.71
   0 -11  -3  116.32   23.35
 -11   0  -3   70.54   27.00
 -11  11  -3   96.75   26.16
  11 -11  -2  288.50   37.78
   0  11  -2  313.70   41.54
   0 -11  -2  289.98   35.51
 -11   0  -2  281.57   46.22
 -11  11  -2  309.26   44.19
  11   0  -2  288.89   35.61
  11   0  -1   35.44   12.92
  11 -11  -1   28.73   13.51
   0  11  -1   27.30   12.30
 -11   0  -1   13.97   13.58
   0 -11  -1   30.98   15.21
 -11  11  -1   30.41   14.88
  11   0   0    4.52    4.99
  11 -11   0    0.32   10.23
   0  11   0    5.84    7.86
 -11   0   0   -6.86   14.38
   0  11   0   19.51    8.33
   0 -11   0   -7.02   12.32
 -11  11   0   -4.48    9.93
  11 -11   1   35.84   13.49
 -11   0   1   40.10   17.62
   0  11   1   68.83   20.09
   0 -11   1   51.38   18.75
   0  11   1   24.24   11.24
 -11   0   1   36.44   10.98
 -11  11   1   38.43   14.33
  11 -11   2  285.09   34.09
   0 -11   2  323.45   39.80
 -11   0   2  359.39   50.44
   0  11   2  221.96   31.10
 -11  11   2  273.47   32.09
 -11   0   2  284.34   29.97
  11 -11   3   99.93   21.81
   0  11   3   90.47   22.21
 -11   0   3   72.10   23.45
   0 -11   3  119.10   25.42
 -11   0   3   79.80   18.48
   0  11   4   64.77   20.31
  11 -11   4   59.44   16.66
 -11   0   4   29.18   16.90
   0 -11   4   51.27   17.89
 -11   0   4   64.23   17.17
   0  11   5  211.64   36.83
  11 -11   5  296.80   35.08
 -11   0   5  277.18   41.38
   0 -11   5  192.96   33.86
 -11   0   5  256.56   34.69
   0  11   6   20.80   14.59
  11 -11   6   14.40    9.52
 -11   0   6   14.07    9.93
   0 -11   6   13.04   10.12
 -11   0   6   28.50   14.47
   0  11   7  210.99   41.50
  11 -11   7  156.59   27.78
 -11   0   7  117.77   27.09
   0 -11   7  129.07   29.80
 -11   0   7  142.14   29.63
   0  11   8   52.41   22.72
   0 -11   8   46.00   22.61
 -11   0   8   75.10   23.08
   0  11   9   49.36   27.50
   0 -11   9  102.98   28.40
 -11   0   9   41.57   19.57
   0 -11  10   73.46   28.05
 -11   0  10   14.72   14.41
   0  11  10   68.02   27.77
   0 -11  11   19.77   14.76
   0  11  11   12.84   15.80
 -11   0  11   16.90   15.63
  11   1 -11   -8.36   12.70
 -11  -1 -11  -20.13   18.33
  12 -11 -10   22.02   17.81
   1 -12 -10   19.75   12.21
 -11  -1 -10   14.98   17.34
 -12  11 -10   12.42   19.41
   1 -12 -10   -4.69   13.32
  12 -11  -9  -37.83   22.08
   1 -12  -9   36.26   15.44
 -11  -1  -9   54.60   25.21
 -12  11  -9   -3.40   14.66
  12 -11  -8  -27.46   22.04
 -11  -1  -8   -4.27   12.91
 -12  11  -8   -2.77   14.65
   1 -12  -8   -3.21    9.82
  12 -11  -7   16.77   15.31
 -11  -1  -7   62.42   29.01
   1 -12  -7   49.54   17.50
 -12  11  -7   49.12   25.25
 -12  11  -6  -13.08   15.48
  12 -11  -6   -5.49   15.82
   1 -12  -6   14.70   11.34
 -11  -1  -6    4.58   15.13
 -12  11  -6  -20.55   17.39
 -12  11  -5   -1.63    9.72
  -1  12  -5    9.29   15.81
   1 -12  -5   15.05   12.88
 -11  -1  -5   26.39   16.50
  12 -11  -5   10.24   11.81
 -12  11  -4  123.80   31.30
  -1  12  -4   80.09   25.94
  12 -11  -4   85.18   23.02
   1 -12  -4  102.81   22.67
 -11  -1  -4   98.41   30.27
 -12  11  -4   85.42   26.68
  12 -11  -3   11.88   14.31
  -1  12  -3   58.07   21.20
   1 -12  -3   20.06   10.31
 -11  -1  -3   25.81   17.70
 -12  11  -3   32.03   15.83
 -12  11  -3   28.65   17.65
 -12  11  -2  258.56   43.68
  12 -11  -2  221.88   33.74
  -1  12  -2  239.58   38.95
 -11  -1  -2  214.24   42.69
   1 -12  -2  239.21   33.56
 -12  11  -2  259.04   41.73
  11   1  -2  233.40   32.29
 -12  11  -1   84.77   26.28
  12 -11  -1   47.49   17.70
  -1  12  -1   47.04   17.40
 -11  -1  -1   67.11   26.33
   1 -12  -1   73.55   19.26
 -12  11  -1   51.15   19.51
  11   1  -1   50.81   15.00
  12 -11   0  250.24   33.39
  -1  12   0  201.09   32.22
 -11  -1   0  214.54   41.88
   1 -12   0  226.02   32.93
 -12  11   0  186.74   31.86
  12 -11   1   90.19   20.82
 -11  -1   1   71.71   25.48
  -1  12   1   43.22   16.91
   1 -12   1   74.85   20.75
 -12  11   1   96.75   22.29
 -11  -1   1   42.81   11.93
  12 -11   2  193.01   28.61
 -11  -1   2  321.06   49.61
   1 -12   2  283.08   38.45
  -1  12   2  193.13   30.86
 -11  -1   2  193.15   26.37
  -1  12   2  233.85   30.60
  12 -11   3   24.86   13.05
 -11  -1   3   18.85   16.67
   1 -12   3   62.36   22.56
 -11  -1   3   46.26   15.08
  -1  12   3   29.25   13.96
  12 -11   4  109.65   21.93
 -11  -1   4   81.41   26.19
   1 -12   4  115.72   26.97
 -11  -1   4  108.41   22.69
  -1  12   4   88.46   22.89
 -11  -1   5   27.42   16.41
  12 -11   5   25.61   10.10
   1 -12   5   37.77   19.39
 -11  -1   5   44.13   17.36
  -1  12   5   10.84   10.64
 -11  -1   6   -8.70   11.33
  12 -11   6   -0.99    6.88
   1 -12   6   -7.78   15.20
 -11  -1   6    0.51    8.01
  -1  12   6   17.79   14.42
 -11  -1   7   66.19   21.30
   1 -12   7   41.43   19.24
 -11  -1   7   54.29   20.08
  -1  12   7   48.48   21.25
   1 -12   8   -3.27   11.22
  -1  12   8    6.92   15.37
 -11  -1   8   15.74   15.81
   1 -12   9   26.70   17.76
  -1  12   9    6.28   12.54
 -11  -1   9    9.71   13.54
   1 -12  10   11.48   14.78
  -1  12  10   -0.55   13.66
 -11  -1  10   12.99   13.70
  -1  12  11   12.14   14.36
   2 -12 -11   -2.76   10.70
 -10  -2 -11   21.09   16.49
  12 -10 -10   41.17   23.55
   2 -12 -10   -1.73    9.98
 -10  -2 -10  -21.19   17.87
 -12  10 -10   25.46   20.80
 -12  10  -9  144.95   35.44
  12 -10  -9  216.29   41.89
   2 -12  -9  149.07   28.96
 -10  -2  -9  122.74   35.57
 -12  10  -9   85.15   33.32
  12 -10  -8   33.18   19.18
   2 -12  -8    0.77    9.79
 -10  -2  -8   -6.71   11.79
 -12  10  -8  -12.70   15.69
 -12  10  -8   15.62   15.72
  12 -10  -7   38.85   18.77
   2 -12  -7    4.63    9.79
 -10  -2  -7   -8.66   14.11
 -12  10  -7   28.13   18.70
  12 -10  -6  154.32   33.02
   2 -12  -6  192.75   30.78
 -10  -2  -6  196.29   41.53
 -12  10  -6  187.96   39.33
  12 -10  -5   23.28   15.64
   2 -12  -5   16.71   11.86
 -10  -2  -5    5.34   13.59
 -12  10  -5   13.63   14.30
  12 -10  -4   22.32   14.95
   2 -12  -4   26.89   13.87
 -10  -2  -4   51.18   22.81
 -12  10  -4   33.24   17.94
  -2  12  -3  348.23   46.59
   2 -12  -3  356.26   38.91
  12 -10  -3  345.27   42.52
 -10  -2  -3  313.00   50.34
 -12  10  -3  356.16   51.17
  -2  12  -2   73.13   22.70
  12 -10  -2   48.34   18.63
   2 -12  -2   56.69   18.08
 -10  -2  -2   64.52   25.05
 -12  10  -2   71.20   24.93
  12 -10  -1   60.13   17.26
  -2  12  -1  123.96   25.73
 -10  -2  -1   93.14   28.95
   2 -12  -1   67.93   18.48
 -12  10  -1   88.00   25.98
  12 -10   0  173.60   27.34
  -2  12   0  237.94   34.13
 -10  -2   0  221.74   41.82
   2 -12   0  248.12   33.62
 -10  -2   0  209.44   23.80
 -12  10   0  221.22   40.15
  12 -10   1   54.83   17.14
 -10  -2   1  106.94   29.99
  -2  12   1  116.35   23.69
   2 -12   1  113.41   25.41
 -10  -2   1  114.52   19.69
 -12  10   1  109.74   29.12
 -12  10   2   56.50   22.23
  12 -10   2   38.74   14.11
 -10  -2   2   59.54   22.54
  -2  12   2   99.31   22.23
   2 -12   2   50.89   18.15
 -12  10   2   54.36   15.37
 -10  -2   2   66.12   16.50
 -12  10   3  364.02   49.35
  12 -10   3  330.98   35.27
  -2  12   3  318.66   37.46
 -10  -2   3  277.20   44.77
   2 -12   3  335.65   41.48
 -10  -2   3  360.17   38.93
 -10  -2   4   34.43   19.12
  12 -10   4   35.26   12.16
   2 -12   4   13.49   11.22
  -2  12   4   33.72   15.40
 -10  -2   4   31.70   14.05
 -10  -2   5   -6.27   10.23
  12 -10   5   19.31   10.66
   2 -12   5    4.72   11.08
  -2  12   5    9.26   11.55
 -10  -2   5   30.99   14.95
 -10  -2   6  127.13   29.04
   2 -12   6  149.21   30.72
  -2  12   6  144.52   31.17
 -10  -2   6  186.44   32.61
 -10  -2   7   -2.98    7.75
   2 -12   7   31.60   21.26
  -2  12   7   16.09   14.03
 -10  -2   7    2.32   12.65
  -2  12   8   -3.71    9.24
   2 -12   8   -6.34   11.61
 -10  -2   8   -4.84   10.50
  -2  12   9  105.23   32.00
   2 -12   9  125.20   30.93
 -10  -2   9  133.19   31.18
   2 -12  10    6.40   12.12
 -10  -2  10   28.00   20.26
   2 -12  11   -3.47   13.18
 -10  -2  11  -10.24   13.10
   3 -12 -12   24.87   18.59
 -12   9 -11   25.08   15.88
  12  -9 -11   23.84   19.30
   3 -12 -11   68.06   23.90
  -9  -3 -11   31.91   20.13
 -12   9 -11   37.84   22.91
  12  -9 -10   78.78   29.58
   3 -12 -10   60.66   19.25
  -9  -3 -10   40.99   21.88
 -12   9 -10   40.64   20.92
   3 -12  -9   11.49   13.81
 -12   9  -9   -8.00   12.49
  12  -9  -8   34.67   19.50
   3 -12  -8   15.52   13.62
  -9  -3  -8  -23.71   18.11
 -12   9  -8    1.15   12.32
  12  -9  -7  145.93   33.38
   3 -12  -7  148.50   27.82
  -9  -3  -7  139.00   36.17
 -12   9  -7  147.57   34.71
  12  -9  -6   25.09   17.88
   3 -12  -6    7.70   11.81
  -9  -3  -6   21.68   17.47
 -12   9  -6   -5.40   12.51
   3 -12  -5  344.69   39.92
  12  -9  -5  358.38   45.83
  -9  -3  -5  393.37   55.71
 -12   9  -5  304.57   47.39
  12  -9  -4   -0.29   13.51
   3 -12  -4   15.08   12.47
  -9  -3  -4   -1.68   12.09
 -12   9  -4   16.65   17.12
  12  -9  -3   16.75   14.73
  -9  -3  -3   24.45   18.31
   3 -12  -3   61.44   18.21
 -12   9  -3   20.26   15.04
  12  -9  -2  539.82   49.37
   3 -12  -2  512.91   46.51
  -9  -3  -2  380.17   53.28
 -12   9  -2  462.90   55.51
  -3  12  -1   72.53   21.80
  12  -9  -1   65.74   19.50
  -9  -3  -1   41.97   20.92
   3 -12  -1   81.56   19.33
  -9  -3  -1   67.52   13.36
 -12   9  -1   89.70   26.66
  12  -9   0   25.84   13.24
  -3  12   0   31.80   15.29
  -9  -3   0   -1.97   11.73
   3 -12   0   32.95   15.52
  -9  -3   0   19.57    9.09
 -12   9   0   38.82   18.85
  12  -9   1   61.07   16.08
  -9  -3   1   38.38   16.21
  -3  12   1   59.39   17.30
   3 -12   1   67.84   20.21
  -9  -3   1   48.48   13.25
 -12   9   1   86.20   25.98
  -3  12   2  393.38   39.97
  12  -9   2  504.90   41.93
  -9  -3   2  403.81   53.64
   3 -12   2  456.98   45.17
  -9  -3   2  411.19   39.65
 -12   9   2  406.80   50.90
  -9  -3   3   43.76   19.77
  12  -9   3   46.40   13.89
   3 -12   3   41.80   17.47
  -3  12   3   72.87   17.88
  -9  -3   3   27.17   12.66
 -12   9   3   47.80   20.76
  -9  -3   4   16.32   12.27
  12  -9   4   22.27    9.75
   3 -12   4   24.41   14.78
  -9  -3   4    6.05    8.56
 -12   9   4   48.66   19.51
 -12   9   5  317.18   44.64
  -9  -3   5  328.62   46.36
   3 -12   5  294.76   39.57
  -9  -3   5  320.98   41.39
  -9  -3   6  -11.33   11.23
   3 -12   6    9.44   10.63
  -9  -3   6    7.04   10.99
  -9  -3   7   90.05   24.58
   3 -12   7  114.12   28.65
  -9  -3   7  103.84   26.65
   3 -12   8   38.39   19.16
  -9  -3   8    4.00    9.82
   3 -12   9   21.48   16.65
  -9  -3   9   36.39   19.70
   3 -12  10   79.28   27.66
  -9  -3  10   52.16   22.95
   9   3  11   51.27   24.67
   3 -12  11   30.20   21.08
  -9  -3  11   20.59   14.98
   4 -12 -13   14.56   16.69
   4 -12 -12   39.91   18.37
  12  -8 -11   10.08   16.02
   4 -12 -11   -0.05   14.96
  -8  -4 -11    9.76   14.51
   8   4 -11  -24.25   14.71
 -12   8 -11  -12.07   13.55
  12  -8 -10    6.37    9.90
   4 -12 -10    4.94   11.48
  -8  -4 -10   -5.49   11.87
   8   4 -10   -4.78   10.13
 -12   8 -10  -12.98   12.87
  12  -8  -9   80.07   27.68
   4 -12  -9  102.21   26.85
  -8  -4  -9   97.46   30.52
   8   4  -9   93.41   23.36
 -12   8  -9  123.40   31.77
  12  -8  -8   27.48   16.04
   4 -12  -8   18.69   12.31
  -8  -4  -8   59.04   25.01
   8   4  -8   50.72   18.64
 -12   8  -8   42.99   21.88
  12  -8  -7   22.12   17.85
   4 -12  -7   22.58   13.04
  -8  -4  -7   -6.58   14.88
 -12   8  -7   -3.96   13.31
  12  -8  -6   70.67   23.57
   4 -12  -6   50.38   18.19
  -8  -4  -6   56.72   25.07
 -12   8  -6   67.95   22.63
  12  -8  -5   18.98   15.31
  -8  -4  -5    6.51   12.75
   4 -12  -5   12.44   11.97
 -12   8  -5    2.77   11.41
  12  -8  -4  153.39   29.65
  -8  -4  -4  183.31   38.72
   4 -12  -4  133.19   25.32
 -12   8  -4  151.38   33.39
   4 -12  -3  485.10   45.15
  -8  -4  -3  437.53   57.33
 -12   8  -3  535.43   59.42
  12  -8  -3  454.65   46.59
  12  -8  -2   44.97   17.00
  -8  -4  -2   61.09   23.62
   4 -12  -2   57.89   17.42
  -8  -4  -2   61.65   12.80
 -12   8  -2   65.79   22.96
   4 -12  -1   74.63   19.58
  12  -8  -1   72.64   17.76
  -8  -4  -1   61.52   21.54
  -8  -4  -1   76.29   15.50
 -12   8  -1   87.29   23.87
  12  -8   0  404.60   38.56
  -4  12   0  462.11   47.20
   4 -12   0  390.35   40.68
  -8  -4   0  382.12   51.75
   4 -12   0  418.85   42.42
 -12   8   0  435.55   52.63
  -8  -4   0  418.37   36.72
  -8  -4   1   56.49   20.66
  -4  12   1   39.19   13.81
  12  -8   1   87.54   17.64
   4 -12   1   58.84   17.98
  -8  -4   1   80.80   17.89
 -12   8   1   78.47   22.69
  -8  -4   2   18.14   15.33
  12  -8   2   59.62   15.57
  -4  12   2   47.62   14.11
   4 -12   2   79.84   20.39
  -8  -4   2   66.00   17.55
 -12   8   2   42.90   19.70
  12  -8   3  501.71   37.98
   4 -12   3  502.22   48.12
 -12   8   3  482.42   55.01
  -8  -4   3  517.21   48.07
  -4  12   3  432.35   38.99
  -8  -4   3  546.64   61.55
  -8  -4   4  189.60   36.66
  12  -8   4  157.53   19.97
   4 -12   4  168.23   30.13
  -8  -4   4  183.03   29.98
 -12   8   4  166.56   32.16
  -8  -4   5    4.24    9.63
   4 -12   5   21.86   15.73
  -8  -4   5    6.28    9.89
 -12   8   5  -10.87   11.70
  -8  -4   6   21.13   14.40
   4 -12   6   45.14   17.14
  -8  -4   6   72.60   19.91
 -12   8   6   39.62   16.74
  -8  -4   7   15.78   10.56
   4 -12   7   -6.14   12.75
  -8  -4   7   -0.62   11.41
   4 -12   8   30.56   17.77
  -8  -4   8   62.71   21.99
   4 -12   9   60.98   20.80
  -8  -4   9   66.51   24.59
   4 -12  10   -4.92   12.37
   8   4  10    3.15   11.19
  -8  -4  10   -7.05   13.42
   8   4  11   21.09   23.25
   4 -12  11   18.68   15.84
  -8  -4  11   20.09   16.60
   4 -12  12   62.69   26.37
   5 -12 -12   20.28   18.89
   7   5 -12    5.63   10.36
  12  -7 -11   34.94   21.70
   5 -12 -11   21.62   19.17
  -7  -5 -11    8.90   12.86
   7   5 -11   14.82   13.99
 -12   7 -11    1.82   10.38
  12  -7 -10    2.22   17.36
   5 -12 -10    0.05   15.05
  -7  -5 -10   51.70   23.76
   7   5 -10   20.97   14.95
 -12   7 -10   36.50   17.55
  12  -7  -9   -1.31   10.75
   5 -12  -9  -19.20   15.60
  -7  -5  -9   11.33   15.71
   7   5  -9   -5.24   10.02
 -12   7  -9    0.30    9.19
  12  -7  -8   80.02   25.60
   5 -12  -8   74.51   22.92
  -7  -5  -8   68.33   28.66
   7   5  -8   66.63   20.63
 -12   7  -8   82.25   26.53
  12  -7  -7  106.08   30.34
   5 -12  -7   65.99   22.77
  -7  -5  -7   52.87   23.34
   7   5  -7   64.07   18.58
 -12   7  -7   52.10   20.73
  12  -7  -6  112.67   26.83
  -7  -5  -6  165.04   37.34
   5 -12  -6  152.30   28.44
   7   5  -6  211.73   33.89
 -12   7  -6  160.54   34.00
  12  -7  -5   51.12   19.29
   5 -12  -5   93.00   23.97
   7   5  -5   98.03   23.79
 -12   7  -5   71.32   26.75
  -7  -5  -5   54.53   22.45
  12  -7  -4   97.34   24.20
  -7  -5  -4   92.65   29.54
   5 -12  -4  118.49   24.51
 -12   7  -4   93.60   25.91
  12  -7  -3  231.61   33.30
  -7  -5  -3  266.23   44.88
   5 -12  -3  261.44   35.43
  -7  -5  -3  272.63   25.52
 -12   7  -3  284.22   43.20
  12  -7  -2  167.47   27.66
  -7  -5  -2  220.36   41.12
   5 -12  -2  258.48   33.35
  -7  -5  -2  258.60   26.38
 -12   7  -2  194.77   36.25
  -7  -5  -1  199.41   39.30
  12  -7  -1  144.05   24.19
   5 -12  -1  130.65   23.55
  -7  -5  -1  141.04   20.99
 -12   7  -1  161.37   33.30
  -7  -5   0  106.85   27.72
  12  -7   0   95.00   19.46
   5 -12   0  103.07   20.41
  -7  -5   0  106.57   19.44
 -12   7   0   78.30   23.09
  -5  12   1  157.18   26.04
  -7  -5   1  142.99   33.82
  12  -7   1  159.73   22.96
   5 -12   1  101.31   21.78
   5 -12   1  170.99   27.21
  -7  -5   1  122.90   21.97
 -12   7   1  144.35   30.98
  12  -7   2  213.16   24.23
  -7  -5   2  160.08   33.94
  -5  12   2  203.59   27.46
   5 -12   2  236.92   32.11
  -7  -5   2  196.72   29.36
 -12   7   2  217.53   36.39
  -5  12   3  257.19   28.98
  12  -7   3  314.42   28.04
  -7  -5   3  236.50   41.08
   5 -12   3  315.76   38.36
  -7  -5   3  295.51   37.13
 -12   7   3  232.16   38.21
  -7  -5   4   33.00   17.85
   5 -12   4   53.39   17.79
  -5  12   4   79.24   15.72
  -7  -5   4   59.40   17.85
 -12   7   4   38.82   17.69
  -7  -5   5   89.59   25.64
   5 -12   5   73.25   20.77
  -7  -5   5  103.16   25.18
 -12   7   5   62.30   20.68
   5 -12   6  122.99   26.83
  -7  -5   6  103.53   27.92
  -7  -5   6  101.82   25.75
 -12   7   6  145.53   29.69
  -7  -5   7   91.08   24.75
   5 -12   7   69.66   23.60
  -7  -5   7   25.12   15.24
 -12   7   7   41.87   17.47
 -12   7   8   78.97   21.15
  -7  -5   8   76.78   22.19
   5 -12   8   81.68   24.80
  -7  -5   8  104.87   27.27
   7   5   9  -19.99   18.05
   5 -12   9   14.16   12.61
  -7  -5   9  -19.54   15.03
   7   5  10   43.15   21.26
   5 -12  10   13.32   13.06
  -7  -5  10   19.35   20.08
   5 -12  11    5.98   12.42
  -7  -5  11   22.85   17.46
   7   5  11   34.83   22.82
  12  -7  12   39.36   19.89
   5 -12  12   -0.07   20.80
   6   6 -13   16.47   17.95
   6 -12 -12   52.34   21.14
   6   6 -12   13.78   12.85
  12  -6 -11   13.01   16.00
  -6  -6 -11   13.78   15.05
   6   6 -11   14.73   16.37
   6 -12 -11   18.68   14.30
 -12   6 -11    7.80   12.71
  12  -6 -10    2.86   13.36
   6 -12 -10   14.61   14.44
  -6  -6 -10  -12.19   13.07
   6   6 -10   13.60   10.17
 -12   6 -10   -4.62   10.07
  12  -6  -9  141.22   35.22
   6 -12  -9  160.57   32.46
  -6  -6  -9  129.36   34.37
   6   6  -9  217.21   38.25
 -12   6  -9  146.46   34.74
  12  -6  -8  -14.16   14.43
   6 -12  -8  -19.08   18.53
  -6  -6  -8    6.49   14.27
   6   6  -8  -19.05   14.24
 -12   6  -8   -2.34   12.84
  12  -6  -7   19.30   11.21
  -6  -6  -7   -7.78   14.63
   6 -12  -7   26.09   16.23
   6   6  -7   19.37   15.73
 -12   6  -7   12.91   11.91
   6 -12  -6  336.87   42.40
  12  -6  -6  376.45   48.73
   6   6  -6  362.85   44.35
  -6  -6  -6  373.82   54.60
 -12   6  -6  375.33   52.14
  12  -6  -5   51.05   19.26
  -6  -6  -5   23.31   17.24
   6 -12  -5   65.64   20.89
   6   6  -5   35.88   17.27
  -6  -6  -5   27.70    8.80
 -12   6  -5   -2.00   19.21
  12  -6  -4   21.29   14.65
  -6  -6  -4   16.53   15.52
   6 -12  -4   37.70   17.53
   6   6  -4   28.76   14.99
  -6  -6  -4   30.96    9.50
 -12   6  -4   24.45   15.10
  12  -6  -3  105.57   23.46
  -6  -6  -3   56.83   21.50
   6 -12  -3   80.44   21.29
  -6  -6  -3   89.65   15.89
 -12   6  -3   48.63   21.17
  -6  -6  -2   -5.54   19.34
  12  -6  -2   51.02   16.64
   6 -12  -2   53.59   17.16
  -6  -6  -2   36.32   11.66
 -12   6  -2   61.65   22.35
  -6  -6  -1   41.79   19.02
  12  -6  -1   59.15   17.02
   6 -12  -1   72.65   18.98
  -6  -6  -1  105.04   18.91
 -12   6  -1   76.93   23.24
  12  -6   0  694.61   46.21
   6 -12   0  699.09   53.09
 -12   6   0  646.94   63.09
  -6  -6   0  642.03   47.53
  -6  -6   0  686.37   69.20
  -6  -6   1   71.12   25.37
  12  -6   1   50.38   12.84
   6 -12   1   66.69   16.84
  -6  -6   1   54.07   14.30
 -12   6   1   75.91   21.73
  -6  -6   2   52.67   21.81
  -6  12   2   31.84   11.95
  12  -6   2   47.59   11.70
   6 -12   2   53.86   17.17
  -6  -6   2   20.66   12.33
 -12   6   2   32.24   15.69
  -6  -6   3   60.15   22.47
  -6  12   3   53.76   13.30
  12  -6   3   64.09   12.39
   6 -12   3   95.71   22.81
  -6  -6   3   85.54   21.15
 -12   6   3   78.17   23.01
  -6  -6   4   19.96   15.91
  -6  12   4   23.72    9.40
   6 -12   4   31.11   14.83
  -6  -6   4   35.94   17.07
 -12   6   4    7.78   11.98
  -6  -6   5   -1.68   10.94
   6 -12   5   37.05   14.07
  -6  -6   5   61.94   21.49
 -12   6   5   22.12   11.82
  -6  -6   6  401.71   51.47
   6 -12   6  304.75   39.84
  -6  -6   6  313.47   42.90
 -12   6   6  311.80   42.27
  -6  -6   7   13.74   10.95
   6 -12   7   24.45   13.91
  -6  -6   7    6.40   12.78
 -12   6   7    9.09    9.45
  -6  -6   8   -2.99    8.46
   6   6   8   -0.77    7.89
   6 -12   8   -6.85   13.35
  -6  -6   8    8.18   13.57
 -12   6   8    9.22    9.88
   6   6   9  141.50   37.33
   6 -12   9  150.14   32.72
  -6  -6   9  141.02   31.90
   6 -12  10   -9.26   13.96
   6   6  10  -13.39   15.71
   6   6  11   -2.80   13.50
   6 -12  11   26.10   17.33
  -6  -6  11   10.72   11.35
  12  -6  12   70.74   30.24
   6 -12  12   61.90   26.04
  12  -6  13  -30.48   19.68
   6 -12  13   13.48   14.85
   5   7 -13    6.62    7.00
   7 -12 -12  -10.09   16.20
   5   7 -12    6.83   11.42
  12  -5 -11   78.91   32.80
   7 -12 -11   35.47   18.81
  -5  -7 -11   58.17   25.14
   5   7 -11   62.72   25.69
 -12   5 -11   57.63   24.70
  12  -5 -10   19.14   17.81
   7 -12 -10   -2.65   12.11
  -5  -7 -10   31.26   17.87
   5   7 -10   26.99   19.12
 -12   5 -10   20.89   15.01
  12  -5  -9   -4.57   17.75
  -5  -7  -9  -10.67   13.78
   7 -12  -9   16.87   18.64
   5   7  -9   10.62   13.70
 -12   5  -9   -2.94   10.38
  12  -5  -8  109.74   29.06
  -5  -7  -8  111.14   31.11
   7 -12  -8  118.20   28.46
   5   7  -8   66.73   22.83
 -12   5  -8   73.20   25.88
  12  -5  -7    6.83   12.29
  -5  -7  -7  -11.73   16.43
   7 -12  -7   -9.07   14.32
   5   7  -7    6.41   11.82
 -12   5  -7   -8.68   13.24
  12  -5  -6   39.11   19.78
  -5  -7  -6   -1.42   15.69
   7 -12  -6   30.02   19.41
   5   7  -6   12.80   11.95
  -5  -7  -6   35.41   10.09
 -12   5  -6   29.03   17.16
  12  -5  -5   85.29   23.96
  -5  -7  -5   86.07   27.00
   7 -12  -5  158.65   30.33
   5   7  -5  134.29   27.79
  -5  -7  -5  102.93   16.29
 -12   5  -5  109.65   29.88
   7 -12  -4  384.66   43.58
   5   7  -4  498.07   50.06
  -5  -7  -4  408.20   32.93
 -12   5  -4  434.66   54.35
  -5  -7  -4  504.56   62.93
  12  -5  -4  477.13   50.47
  -5  -7  -3   -0.30   15.83
  12  -5  -3    5.06   10.02
   7 -12  -3    1.61   11.24
   5   7  -3   -8.83   10.70
  -5  -7  -3    2.90    6.11
 -12   5  -3    2.04   16.77
  -5  -7  -2  127.89   33.64
  12  -5  -2   85.06   20.23
   7 -12  -2   65.91   18.36
  -5  -7  -2   87.84   17.37
 -12   5  -2  101.10   27.23
  -5  -7  -1   82.96   26.34
  12  -5  -1   84.46   18.07
   7 -12  -1   81.86   21.23
  -5  -7  -1   53.54   15.25
 -12   5  -1   82.29   25.34
  12  -5   0  617.71   42.73
   7 -12   0  619.85   50.80
 -12   5   0  593.32   61.24
  -5  -7   0  564.64   45.47
  -5  -7   0  602.66   65.68
  -5  -7   1   67.82   24.39
   7 -12   1   41.57   18.19
  -5  -7   1   40.68   14.14
 -12   5   1   34.87   17.37
  12  -5   1   41.78   11.59
  -5  -7   2  125.33   30.20
  12  -5   2  122.01   16.25
   7 -12   2   73.32   19.54
   7 -12   2  122.94   24.27
  -5  -7   2  101.66   22.39
 -12   5   2   77.24   22.08
  -5  -7   3   -5.79   13.40
  -7  12   3   13.67    9.07
   7 -12   3    7.76    9.40
  -5  -7   3  -10.42   12.25
 -12   5   3   -5.18   12.20
 -12   5   4  422.02   50.50
   7 -12   4  490.65   46.68
  -5  -7   4  460.54   48.05
  -5  -7   4  515.67   59.52
  -5  -7   5   96.47   27.80
   7 -12   5  127.29   25.19
  -5  -7   5  128.72   27.65
 -12   5   5  124.18   27.72
  -5  -7   6   35.50   18.25
   7 -12   6   43.97   17.18
  -5  -7   6   28.01   16.59
 -12   5   6   24.53   13.76
  -5  -7   7   23.48   17.24
   7 -12   7   -2.71   13.10
   5   7   7   19.65   15.24
  -5  -7   7    8.36   12.84
 -12   5   7    9.96    9.82
  -5  -7   8   85.44   25.10
   5   7   8   86.85   27.87
   7 -12   8   55.75   19.74
  -5  -7   8   72.05   23.12
   7 -12   9   -9.90   11.44
   5   7   9   18.25   17.60
  -5  -7   9    9.27   12.44
   5   7  10  -13.04   16.29
   7 -12  10   27.52   15.53
  -5  -7  10   25.48   16.69
   5   7  11   76.96   32.17
   7 -12  11   61.05   23.70
  -5  -7  11   34.61   22.25
   7 -12  12   37.15   20.22
   7 -12  13   -8.41   11.99
   4   8 -12   71.46   26.08
  12  -4 -11    0.75    8.66
   8 -12 -11    6.41   11.84
  -4  -8 -11  -18.03   15.61
   4   8 -11  -21.48   17.07
  -8  12 -11    4.23   14.03
 -12   4 -11  -32.23   18.92
  12  -4 -10   17.05   14.05
  -4  -8 -10   25.35   19.00
   8 -12 -10   -9.08   18.50
  -8  12 -10  -15.82   18.26
   4   8 -10   -0.18   14.58
 -12   4 -10   11.43   13.39
  12  -4  -9   74.73   24.67
  -4  -8  -9  127.86   35.29
   8 -12  -9   51.60   22.11
  -8  12  -9  124.03   36.38
   4   8  -9   31.70   16.49
 -12   4  -9   73.49   26.22
  12  -4  -8    4.90   13.74
  -4  -8  -8   42.13   23.18
   8 -12  -8   38.79   20.73
  -8  12  -8   24.62   18.12
   4   8  -8   36.84   18.74
 -12   4  -8    5.03   13.63
  12  -4  -7   27.88   19.01
  -4  -8  -7   21.14   16.81
   8 -12  -7   38.04   20.52
  -8  12  -7    8.20   10.86
   4   8  -7    1.91   12.72
 -12   4  -7    9.41   11.84
  12  -4  -6  199.62   37.41
  -4  -8  -6  105.33   32.06
   8 -12  -6  203.67   35.18
  -8  12  -6  171.10   36.86
   4   8  -6  139.54   30.44
  -4  -8  -6  161.92   22.30
 -12   4  -6  136.40   33.01
  12  -4  -5   72.80   21.66
  -4  -8  -5   22.55   14.33
   8 -12  -5   41.67   19.06
  -8  12  -5   54.94   20.32
   4   8  -5   41.91   17.40
  -4  -8  -5   44.03   13.60
 -12   4  -5    9.71   15.94
  -4  -8  -4   67.34   24.54
  12  -4  -4  116.95   27.12
   8 -12  -4   66.83   22.00
   4   8  -4   76.04   21.78
  -4  -8  -4   87.81   17.27
 -12   4  -4   65.89   23.83
   8 -12  -3  664.14   55.04
   4   8  -3  552.37   52.29
 -12   4  -3  601.42   64.63
  -4  -8  -3  582.48   42.41
  -4  -8  -3  638.11   69.41
  12  -4  -3  664.31   56.00
  -4  -8  -2   16.06   13.96
  12  -4  -2   30.58   13.40
   8 -12  -2   34.73   20.05
   4   8  -2   31.31   15.27
  -4  -8  -2   19.68   10.20
 -12   4  -2   21.10   16.33
  -4  -8  -1   71.86   24.58
  12  -4  -1   49.81   13.78
   8 -12  -1   24.42   12.95
  -4  -8  -1   55.48   15.79
 -12   4  -1   41.31   16.74
   8 -12   0  629.23   51.16
 -12   4   0  715.61   67.97
  -4  -8   0  703.35   51.58
  -4  -8   0  741.79   71.97
  12  -4   0  655.46   42.57
  -4  -8   1   55.82   24.11
  12  -4   1   46.94   11.23
   8 -12   1   46.08   16.00
  -4  -8   1   60.85   18.33
 -12   4   1   32.68   19.57
  -4  -8   2   17.90   15.47
   8 -12   2   49.22   17.98
  -4  -8   2   15.59   12.58
 -12   4   2   15.64   15.35
 -12   4   3  672.23   64.31
   8 -12   3  625.76   51.86
  -4  -8   3  570.34   52.04
  -4  -8   3  584.27   62.25
  -4  -8   4   58.69   17.94
   8 -12   4   80.71   20.33
  -4  -8   4   80.09   22.15
 -12   4   4   53.63   19.36
  -4  -8   5   29.48   17.03
   8 -12   5   38.83   14.13
  -4  -8   5   34.25   16.06
 -12   4   5   22.60   11.46
   4   8   5   66.95   24.02
  -4  -8   6  113.84   28.46
   8 -12   6  140.12   27.29
  -4  -8   6  129.47   28.86
 -12   4   6  126.19   28.48
   4   8   6   98.19   27.75
   4   8   7   -2.54   11.19
  -4  -8   7  -13.30   13.05
   8 -12   7   21.25   12.37
  -4  -8   7   26.61   17.62
 -12   4   7   -2.78    9.78
  -4  -8   8   32.15   18.70
   8 -12   8   35.08   17.78
   4   8   8   16.79   15.07
  -4  -8   8   28.55   18.01
   8 -12   9  106.35   29.10
  -4  -8   9   97.75   29.02
   8 -12  10  -19.75   14.34
  -4  -8  10  -14.82   15.64
   4   8  10    7.38   13.83
   8 -12  11   16.36   14.14
   4   8  11    2.46   11.12
  -4  -8  11   -5.70   15.49
   8 -12  12   83.92   28.81
   3   9 -12   11.54   14.99
  12  -3 -11   -9.56   14.06
  -9  12 -11  -31.85   21.74
  -3  -9 -11   18.95   16.12
   9 -12 -11   28.69   19.73
   3   9 -11   -0.59   11.41
 -12   3 -11    2.74   13.34
  12  -3 -10   70.99   26.14
  -3  -9 -10   54.67   24.44
  -9  12 -10   69.43   28.96
   9 -12 -10   43.90   22.19
   3   9 -10   22.36   18.93
 -12   3 -10   37.26   19.49
  -3  -9  -9   37.21   20.69
  -9  12  -9   36.28   23.25
   9 -12  -9   30.42   18.25
   3   9  -9   24.24   16.27
  12  -3  -9   48.39   21.18
 -12   3  -9   35.48   19.88
  12  -3  -8  162.12   35.95
  -3  -9  -8  165.57   38.56
  -9  12  -8  123.19   37.45
   9 -12  -8  129.09   31.21
   3   9  -8  174.12   35.08
 -12   3  -8  148.36   36.25
  12  -3  -7    6.25   12.26
  -3  -9  -7    1.17   20.04
  -9  12  -7    3.04   10.74
   9 -12  -7   16.88   16.14
   3   9  -7   13.22   15.41
 -12   3  -7   19.07   17.02
  12  -3  -6   63.81   22.30
  -3  -9  -6   82.52   27.90
  -9  12  -6   80.40   28.27
   9 -12  -6   89.43   26.41
   3   9  -6   67.41   21.83
  -3  -9  -6   70.58   15.26
 -12   3  -6  102.37   30.33
  -3  -9  -5   44.58   24.78
  12  -3  -5   34.20   15.36
  -9  12  -5   48.02   19.44
   9 -12  -5   81.16   25.79
   3   9  -5   36.31   16.85
  -3  -9  -5   50.40   14.62
 -12   3  -5   44.00   21.72
  -3  -9  -4  186.26   39.23
  12  -3  -4  169.91   31.36
  -9  12  -4  215.26   39.01
   9 -12  -4  116.57   26.91
   3   9  -4  125.44   27.71
  -3  -9  -4  190.43   26.42
 -12   3  -4  159.01   35.89
  12  -3  -3  197.37   31.64
  -9  12  -3  217.12   37.48
   9 -12  -3  240.99   35.47
   3   9  -3  239.84   35.69
  -3  -9  -3  164.65   24.80
 -12   3  -3  188.02   38.18
   9 -12  -2  573.27   51.72
 -12   3  -2  583.37   64.43
   3   9  -2  447.69   47.35
  -3  -9  -2  591.61   46.62
  -9  12  -2  531.46   55.67
  12  -3  -2  560.94   47.97
  12  -3  -1    4.54    6.79
   9 -12  -1    8.45   11.48
   3   9  -1   19.15   14.07
  -3  -9  -1   11.97    9.23
 -12   3  -1   15.03   15.57
  12  -3   0   40.22   11.31
   9 -12   0   78.28   21.60
  -3  -9   0   36.48   14.15
 -12   3   0   49.61   18.92
   9 -12   1   -2.43   11.10
  -3  -9   1   12.26   10.68
 -12   3   1   10.36   12.66
 -12   3   2  452.45   54.10
   9 -12   2  557.10   48.90
  -3  -9   2  514.55   48.35
   9 -12   3  189.86   29.85
   3   9   3  127.46   27.90
  -3  -9   3  189.88   31.67
 -12   3   3  166.32   33.09
   9 -12   4  147.89   25.85
  -3  -9   4  173.46   31.00
 -12   3   4  127.06   29.02
   3   9   4   81.13   22.23
   3   9   5   44.04   17.95
   9 -12   5   27.78   14.15
  -3  -9   5   30.94   16.78
 -12   3   5   37.69   17.23
   9 -12   6   57.45   18.19
   3   9   6   27.92   15.87
  -3  -9   6   43.57   19.65
 -12   3   6   67.92   22.19
   3   9   7   33.69   17.99
   9 -12   7    4.58    9.47
  -3  -9   7   41.26   17.51
 -12   3   7   26.40   14.62
  -3  -9   7    9.08   11.44
  -3  -9   8  140.75   30.93
   3   9   8  133.30   35.59
   9 -12   8  160.22   31.09
  -3  -9   8  133.63   31.85
   9 -12   9   62.20   20.67
  -3  -9   9   38.11   20.40
   3   9   9   51.18   25.93
   3   9  10   37.68   21.08
   9 -12  10   57.01   20.98
  -3  -9  10   46.87   22.60
   3   9  11    9.16   16.08
  -3  -9  11   10.20   14.85
  12  -2 -11   -9.77   15.15
   2  10 -11   29.05   19.77
 -12   2 -11   12.83   15.81
  12  -2 -10    9.56   13.37
 -10  12 -10    8.00   13.29
  -2 -10 -10  -11.31   14.08
  10 -12 -10  -29.95   22.59
   2  10 -10   -1.45   11.37
 -12   2 -10   17.98   15.97
  12  -2  -9   34.07   21.39
 -10  12  -9   40.25   24.09
  -2 -10  -9   26.65   16.94
  10 -12  -9   36.82   17.64
   2  10  -9   87.32   28.28
 -12   2  -9   27.59   17.45
  12  -2  -8   22.39   16.84
 -10  12  -8   32.34   21.03
  -2 -10  -8   -7.01   12.66
  10 -12  -8    6.39   13.43
   2  10  -8    7.92   16.17
 -12   2  -8   11.28   15.12
  12  -2  -7  -11.92   14.14
 -10  12  -7   -8.34   13.80
  -2 -10  -7   -6.76   15.50
  10 -12  -7   15.41   17.45
   2  10  -7   -4.06   12.19
  -2 -10  -7   -4.49    8.52
 -12   2  -7   30.66   21.97
  12  -2  -6   81.88   25.21
 -10  12  -6   62.47   24.81
  10 -12  -6   49.46   18.02
   2  10  -6   68.45   22.52
  -2 -10  -6   82.38   17.82
 -12   2  -6   72.77   26.25
  -2 -10  -6   61.04   25.08
 -10  12  -5    1.32   11.68
  12  -2  -5   22.30   16.20
  10 -12  -5   20.33   15.47
   2  10  -5   20.79   16.15
  -2 -10  -5   23.12    8.90
  -2 -10  -5   15.58   10.68
 -12   2  -5   37.47   20.21
  12  -2  -4  103.86   24.86
  10 -12  -4  141.39   29.08
   2  10  -4  154.49   31.82
 -10  12  -4  101.02   26.71
  -2 -10  -4  106.96   20.82
 -12   2  -4  138.75   35.17
  12  -2  -3  231.16   34.83
 -10  12  -3  181.90   34.48
  10 -12  -3  185.54   32.34
   2  10  -3  141.72   28.34
  -2 -10  -3  180.11   27.57
 -12   2  -3  180.05   38.02
  12  -2  -2    4.35    8.32
 -10  12  -2   20.59   13.94
  10 -12  -2   34.32   16.71
   2  10  -2   22.33   14.15
  -2 -10  -2   20.50   12.11
 -12   2  -2   28.17   16.40
  12  -2  -1   -1.59    7.37
 -10  12  -1   25.56   13.43
  10 -12  -1   18.36   13.30
   2  10  -1   30.85   14.81
  -2 -10  -1   10.56   11.31
 -12   2  -1    8.94   12.44
 -12   2   0  971.14   82.70
  10 -12   0  948.23   64.25
   2  10   0  981.50   68.89
  -2 -10   0 1028.50   65.82
   2  10   0  933.73   59.07
 -10  12   0 1023.38   70.48
  12  -2   0 1048.76   51.92
  10 -12   1   13.68   11.39
  -2 -10   1    7.17   11.04
 -12   2   1   21.04   13.66
   2  10   1   36.65   14.10
   2  10   2   17.30   10.45
  10 -12   2   15.35   10.34
  -2 -10   2   13.26   11.66
 -12   2   2   31.85   16.34
  10 -12   3  168.80   28.41
  10 -12   3  200.70   30.15
 -12   2   3  188.85   36.31
  -2 -10   3  241.13   36.53
   2  10   3  145.04   28.63
  10 -12   4  122.42   24.65
   2  10   4  102.35   26.37
 -12   2   4  126.16   28.99
  -2 -10   4  110.42   25.78
   2  10   5   20.82   13.23
  10 -12   5   47.57   16.59
 -12   2   5   30.41   15.10
  -2 -10   5   49.68   19.91
   2  10   6   46.85   21.01
  10 -12   6   74.79   20.14
 -12   2   6   69.88   21.61
  -2 -10   6   53.11   20.51
  10 -12   7    6.10    7.70
 -12   2   7    6.13    8.64
  -2 -10   7   -4.91   12.65
   2  10   7   20.07   16.67
  10 -12   8   14.39   12.37
   2  10   8    0.07   11.52
  -2 -10   8    4.29   12.56
   2  10   9   26.04   18.46
  10 -12   9   42.09   18.20
  -2 -10   9   77.64   27.27
   2  10  10   15.65   15.17
  -2 -10  10   44.53   21.83
   2  10  11   16.52   16.29
  12  -1 -11   -2.56   12.58
 -12   1 -11   12.84   18.05
  12  -1 -10    2.20   11.55
   1  11 -10  -15.03   18.21
  -1 -11 -10   29.79   19.45
  11 -12 -10  -12.26   19.95
 -12   1 -10   30.91   21.29
 -11  12 -10   -1.28   13.58
  12  -1  -9   18.32   17.93
  -1 -11  -9   59.43   24.62
   1  11  -9  -13.51   14.24
  11 -12  -9   28.60   17.73
 -12   1  -9   40.26   23.49
 -11  12  -9   28.28   26.18
  12  -1  -8   22.60   17.06
  -1 -11  -8   64.28   27.09
  11 -12  -8   52.24   22.16
   1  11  -8   39.70   19.43
  -1 -11  -8   32.02   14.25
 -12   1  -8   62.04   27.64
 -11  12  -8  -12.23   16.68
  12  -1  -7   30.18   15.97
  11 -12  -7   34.82   16.23
   1  11  -7   53.42   23.23
  -1 -11  -7   62.46   18.61
 -12   1  -7   57.87   24.32
 -11  12  -7   29.32   24.15
  12  -1  -6   42.20   17.43
  11 -12  -6   20.64   14.87
   1  11  -6   59.02   23.31
  -1 -11  -6   57.59   17.15
 -12   1  -6   19.69   15.27
 -11  12  -6   27.75   19.55
  12  -1  -5   97.53   25.82
  11 -12  -5  106.03   27.31
   1  11  -5  119.23   30.15
  -1 -11  -5   82.81   19.21
 -12   1  -5  112.18   33.20
 -11  12  -5   96.37   28.79
  12  -1  -4   31.66   14.40
  11 -12  -4   31.82   18.27
   1  11  -4   29.03   17.04
  -1 -11  -4   20.16   13.79
 -12   1  -4   49.69   24.48
 -11  12  -4    2.32   12.05
  12  -1  -3   16.30   11.55
  11 -12  -3   30.27   16.27
   1  11  -3    6.29    8.68
  -1 -11  -3   15.78   12.34
 -12   1  -3   43.56   22.48
 -11  12  -3    5.03   11.39
 -11  12  -2   20.11   13.79
  12  -1  -2   23.41   11.38
  11 -12  -2   17.36   12.26
   1  11  -2   33.16   16.31
  -1 -11  -2   36.72   15.40
 -12   1  -2   37.85   20.47
 -11  12  -1   71.12   21.81
  12  -1  -1  117.96   20.51
  11 -12  -1  118.25   24.59
   1  11  -1   85.87   22.68
  -1 -11  -1  122.25   24.36
 -12   1  -1  173.06   37.83
 -11  12   0   53.39   17.54
  11 -12   0   58.52   18.94
   1  11   0   38.45   15.77
  -1 -11   0   32.36   15.09
 -12   1   0   67.74   27.80
   1  11   1   97.17   20.55
 -11  12   1  105.74   22.12
  11 -12   1   99.64   22.17
 -12   1   1  111.46   29.19
  -1 -11   1   65.51   19.77
  11 -12   2   27.74   13.05
 -12   1   2   30.86   17.47
  -1 -11   2   24.36   14.96
   1  11   2   18.69   11.25
  11 -12   3   -3.58   10.41
  11 -12   3   37.74   13.64
 -12   1   3   14.17   10.90
  -1 -11   3    7.61   12.44
   1  11   3   23.22   13.16
  11 -12   4   28.38   12.98
 -12   1   4   57.87   23.11
  -1 -11   4   20.81   12.93
   1  11   4   39.08   17.72
  11 -12   5  140.96   26.39
 -12   1   5  105.50   27.64
  -1 -11   5   71.46   23.14
   1  11   5  102.19   27.27
  11 -12   6   57.51   16.91
   1  11   6   19.73   16.50
 -12   1   6   54.93   19.96
  -1 -11   6   88.55   28.36
   1  11   7   49.52   21.94
  11 -12   7   35.88   14.41
 -12   1   7   56.52   20.13
  -1 -11   7   39.27   18.38
   1  11   8   67.99   27.43
  11 -12   8   23.78   15.10
  -1 -11   8   50.43   21.75
   1  11   9   26.85   20.55
  -1 -11   9   31.65   19.54
   1  11  10   17.58   18.20
  -1 -11  10   -0.83   10.94
   1  11  11   -1.85    9.73
 -12   0 -11  -14.97   16.53
   0 -12 -10    2.50   12.44
 -12   0 -10   -0.55   10.21
  12   0 -10   20.35   17.03
  12 -12  -9   31.43   20.66
 -12   0  -9   48.94   24.57
 -12  12  -9   17.31   19.53
   0 -12  -9   51.33   24.86
  12   0  -9   36.60   21.17
   0  12  -8    0.91   12.49
  12 -12  -8  -16.77   16.72
   0 -12  -8   -2.63    9.97
 -12   0  -8    2.71   10.85
 -12  12  -8   -2.23   11.16
  12   0  -8  -12.47   14.00
   0  12  -7   29.97   19.79
  12 -12  -7   47.88   22.08
   0 -12  -7   26.97   15.12
 -12   0  -7   57.05   27.88
 -12  12  -7   29.02   21.55
  12   0  -7   33.28   17.70
  12 -12  -6  178.17   35.79
   0  12  -6  185.29   37.61
   0 -12  -6  167.01   28.63
 -12   0  -6  202.91   43.55
 -12  12  -6  139.08   36.25
  12   0  -6  120.51   29.47
  12 -12  -5  122.51   28.39
   0  12  -5  140.74   32.08
   0 -12  -5   90.86   21.60
 -12   0  -5   92.14   28.09
 -12  12  -5   77.71   26.46
  12   0  -5  103.45   25.92
  12 -12  -4    5.05   12.02
   0  12  -4   -0.21   12.43
   0 -12  -4    6.78    9.17
   0 -12  -4   -3.00    9.12
 -12   0  -4   17.76   17.57
 -12  12  -4    9.57   12.36
  12   0  -4    2.04    9.64
  12   0  -3  131.93   26.84
  12 -12  -3  148.90   29.23
   0  12  -3   81.33   25.09
   0 -12  -3  165.85   29.51
 -12   0  -3  115.78   32.21
 -12  12  -3  112.24   29.54
  12   0  -2   68.18   18.91
  12 -12  -2   40.58   15.75
   0  12  -2   41.59   17.15
   0 -12  -2   70.46   19.05
 -12   0  -2   42.58   20.62
 -12  12  -2   81.17   23.97
  12 -12  -1   21.00   12.78
   0  12  -1   10.21   12.07
 -12   0  -1   16.58   13.71
   0 -12  -1   19.83   14.41
 -12  12  -1   -1.83    9.45
  12 -12   0  290.29   36.86
   0  12   0  291.81   39.59
 -12   0   0  263.65   47.02
   0 -12   0  310.23   39.58
 -12  12   0  222.82   34.42
 -12  12   1    0.22    5.86
  12 -12   1    9.13   10.79
 -12   0   1   13.11   17.61
   0 -12   1   11.66   11.77
   0  12   1   20.07   12.42
  12 -12   2   55.69   16.83
 -12   0   2   67.28   24.02
   0 -12   2   90.91   22.90
 -12   0   2   65.70   15.45
   0  12   3   81.81   21.72
  12 -12   3  125.51   24.87
  12 -12   3  111.98   22.67
 -12   0   3   92.12   26.96
   0 -12   3   83.74   23.34
 -12   0   3  107.75   20.90
   0  12   4   18.48   12.93
  12 -12   4    7.70    8.45
 -12   0   4    8.56   15.10
   0 -12   4   14.38   15.98
 -12   0   4   -5.81    8.29
   0  12   5   57.41   21.03
  12 -12   5  109.91   22.72
 -12   0   5  140.75   32.45
   0 -12   5   88.16   24.56
 -12   0   5   95.18   21.99
   0  12   6  134.19   33.05
  12 -12   6  189.88   30.22
 -12   0   6  131.17   30.63
   0 -12   6  182.18   35.70
 -12   0   6  145.03   28.43
   0  12   7   38.32   19.30
 -12   0   7   17.57   13.69
   0 -12   7   28.33   19.43
 -12   0   7   66.67   21.85
   0  12   8   -9.37   12.20
   0 -12   8  -16.07   15.58
 -12   0   8   -1.02   10.34
   0 -12   9   35.25   19.12
 -12   0   9   65.34   23.42
   0  12   9   16.98   13.38
   0  12  10   -0.33   10.43
 -12   0  10   17.82   17.28
   0  12  11   32.21   20.12
 -12  -1 -11  -37.31   23.69
 -12  -1 -10   15.60   15.45
   1 -13 -10   -6.98   14.31
  12   1 -10    0.07   12.92
  13 -12  -9   20.60   15.62
   1 -13  -9   12.14   11.48
 -12  -1  -9   19.82   16.85
 -13  12  -9  -19.01   20.00
  12   1  -9    0.92   10.59
  13 -12  -8   -7.57   14.11
   1 -13  -8    5.98   11.35
 -12  -1  -8   17.20   15.78
 -13  12  -8   11.31   17.89
  12   1  -8    0.48    7.84
  -1  13  -7   53.08   22.76
  13 -12  -7   47.82   21.20
   1 -13  -7   41.15   17.24
 -12  -1  -7   73.15   28.85
 -13  12  -7   69.57   29.22
  12   1  -7   37.84   18.15
  -1  13  -6   -9.86   14.75
  13 -12  -6    4.34   11.87
   1 -13  -6  -12.39   11.80
 -12  -1  -6    7.47   15.97
 -13  12  -6    8.80   11.77
  12   1  -6   -1.54    9.26
  13 -12  -5  167.57   34.32
  -1  13  -5  136.31   33.21
   1 -13  -5  132.67   26.28
 -12  -1  -5   95.91   31.93
 -13  12  -5  106.38   30.84
  12   1  -5   69.50   21.67
  13 -12  -4   95.58   25.88
  -1  13  -4  114.60   31.06
   1 -13  -4   59.53   18.79
 -12  -1  -4   99.21   31.67
 -13  12  -4   58.89   23.12
  12   1  -4   66.64   20.12
  13 -12  -3   -5.49   13.23
  -1  13  -3  -28.51   16.80
   1 -13  -3   12.72   13.41
 -12  -1  -3  -40.02   23.01
 -13  12  -3  -11.71   13.30
  12   1  -3  -19.16   12.22
  13 -12  -2   15.45   13.80
  -1  13  -2   -2.31   11.33
 -12  -1  -2   33.76   19.75
   1 -13  -2   14.47   10.92
 -13  12  -2   11.72    8.94
  13 -12  -1   84.84   21.48
  -1  13  -1  105.27   26.58
 -12  -1  -1   89.94   31.53
   1 -13  -1  151.58   28.82
 -13  12  -1  126.21   27.36
  13 -12   0  147.88   27.86
  -1  13   0  139.89   28.45
 -12  -1   0  176.99   42.44
   1 -13   0  141.38   29.43
 -13  12   0  160.34   30.86
  13 -12   1   92.27   22.08
 -12  -1   1   93.46   30.09
  -1  13   1  121.28   25.83
   1 -13   1  101.71   23.53
  13 -12   2   20.37   11.85
 -12  -1   2   34.18   19.88
   1 -13   2   16.05   11.07
 -12  -1   2   27.47   11.37
  13 -12   3  -19.83   12.21
 -12  -1   3    0.52   15.21
   1 -13   3   -1.33   12.30
 -12  -1   3   -8.00    8.32
  13 -12   4   83.69   20.01
 -12  -1   4  103.18   29.17
   1 -13   4   79.21   24.61
 -12  -1   4   85.26   20.79
 -12  -1   5   48.83   21.35
   1 -13   5  132.52   30.65
  -1  13   5   60.83   21.07
 -12  -1   5  102.17   24.14
 -12  -1   6   34.69   17.76
   1 -13   6    8.73   12.09
  -1  13   6   15.65   13.20
 -12  -1   6    3.73    9.43
 -12  -1   7   54.16   21.39
   1 -13   7   45.51   22.49
  -1  13   7   64.90   23.82
 -12  -1   7   55.90   20.97
   1 -13   8    1.64   10.95
 -12  -1   8    0.05   10.04
   1 -13   9    2.39   13.80
  -1  13   9   13.11   10.48
 -12  -1   9    6.84   11.14
  -1  13  10   -1.40    9.34
 -12  -1  10  -27.64   17.17
 -11  -2 -11    4.81   15.06
   2 -13 -10   -3.18   10.54
 -11  -2 -10   -6.41   12.35
  13 -11  -9  -10.15   15.30
   2 -13  -9  -22.46   13.45
 -11  -2  -9   18.04   19.80
 -13  11  -9   -5.28   13.30
 -13  11  -8   61.48   24.81
  13 -11  -8   15.61   15.40
   2 -13  -8   42.57   15.95
 -11  -2  -8   43.25   25.04
 -13  11  -8   47.80   25.74
 -13  11  -7   17.56   15.04
  13 -11  -7   14.66   13.01
   2 -13  -7   11.45   12.01
 -11  -2  -7  -17.06   13.65
 -13  11  -7    5.93   11.81
 -13  11  -6   -6.25   13.12
  13 -11  -6   -0.53   17.83
   2 -13  -6    0.82    9.04
 -11  -2  -6  -24.90   21.32
 -13  11  -6  -21.41   17.23
  13 -11  -5  246.11   40.84
   2 -13  -5  259.88   36.29
 -11  -2  -5  207.32   44.86
 -13  11  -5  248.04   47.11
 -13  11  -5  201.07   41.56
  -2  13  -4   -6.87   11.00
  13 -11  -4   13.40   15.71
   2 -13  -4   10.30   11.12
 -11  -2  -4  -21.03   18.35
 -13  11  -4    3.53   12.51
 -13  11  -4   21.67   14.37
  -2  13  -3   24.12   16.72
  13 -11  -3   23.85   14.30
   2 -13  -3   17.48   12.13
 -11  -2  -3    5.74   16.37
 -13  11  -3    6.64   14.82
 -13  11  -3   10.14   13.71
  13 -11  -2  -24.47   14.28
  -2  13  -2   -5.99   11.25
 -11  -2  -2   16.21   15.10
   2 -13  -2   -2.58   11.41
 -13  11  -2    8.47   10.66
 -13  11  -2  -10.41   11.12
  13 -11  -1  151.72   27.25
  -2  13  -1  209.10   36.16
 -11  -2  -1  180.53   40.37
   2 -13  -1  215.56   34.09
 -13  11  -1  135.79   29.59
 -13  11  -1  216.36   41.17
 -13  11   0   24.53   15.59
  13 -11   0   54.07   18.42
  -2  13   0   57.06   20.75
 -11  -2   0   33.13   20.97
   2 -13   0   67.98   20.53
 -13  11   0   32.05   15.53
 -13  11   1  141.19   33.35
  13 -11   1  168.07   27.62
 -11  -2   1  170.99   38.57
  -2  13   1  184.75   31.43
   2 -13   1  184.59   31.25
 -13  11   1  192.98   31.30
 -11  -2   1  191.34   25.27
 -13  11   2  -11.53   12.81
  13 -11   2   12.87   10.55
 -11  -2   2   -2.48   12.90
   2 -13   2   -5.51   10.22
  -2  13   2   11.44   10.17
 -11  -2   2    0.33    6.65
  13 -11   3   13.68   11.47
 -11  -2   3   10.84   14.18
   2 -13   3   10.79   14.75
 -11  -2   3  -10.59   10.79
 -11  -2   4   44.75   21.64
  13 -11   4   13.92   10.13
   2 -13   4   10.14   10.73
 -11  -2   4   18.48   11.77
  -2  13   5  219.62   35.89
 -11  -2   5  260.39   44.93
   2 -13   5  261.98   40.74
 -11  -2   5  204.25   33.42
  -2  13   6   13.32   13.93
 -11  -2   6  -18.02   14.14
   2 -13   6   -5.88   14.44
 -11  -2   6  -11.80   11.36
 -11  -2   7    0.22    6.77
   2 -13   7   34.04   21.01
 -11  -2   7   23.45   14.57
   2 -13   8   68.55   23.84
 -11  -2   8   55.16   20.50
   2 -13   9  -23.65   17.29
 -11  -2   9  -10.10   13.47
 -11  -2  10  -23.84   17.41
   3 -13 -12  -11.76   12.68
 -13  10 -11   49.74   26.86
   3 -13 -11   72.70   24.78
 -10  -3 -11   49.02   25.99
 -13  10 -10   24.35   18.15
  13 -10 -10    0.97   13.26
   3 -13 -10   28.04   16.38
 -10  -3 -10  -25.53   20.39
 -13  10 -10   31.11   24.09
  13 -10  -9   35.99   20.55
   3 -13  -9    7.83   12.23
 -10  -3  -9  -11.26   16.03
 -13  10  -9   -4.71   12.38
  13 -10  -8   65.05   24.10
   3 -13  -8   22.14   14.38
 -10  -3  -8   19.92   17.79
 -13  10  -8   29.22   15.29
  13 -10  -7   27.83   15.89
   3 -13  -7   28.45   15.21
 -10  -3  -7  -17.50   18.84
 -13  10  -7   26.65   17.46
  13 -10  -6   26.84   16.13
   3 -13  -6   39.12   15.47
 -10  -3  -6   28.52   19.26
 -13  10  -6    7.97   12.77
  13 -10  -5   49.04   19.57
   3 -13  -5   46.32   18.67
 -10  -3  -5   31.11   21.89
 -13  10  -5   34.07   21.28
  13 -10  -4  184.31   33.70
   3 -13  -4  208.03   31.84
 -10  -3  -4  169.13   39.54
 -13  10  -4  129.42   32.47
  13 -10  -3   57.48   20.06
   3 -13  -3    6.39   10.73
 -10  -3  -3   66.33   27.71
 -13  10  -3   47.18   21.72
  -3  13  -2   23.49   11.50
  13 -10  -2   47.22   17.08
 -10  -3  -2   50.88   22.94
   3 -13  -2   44.18   17.27
 -13  10  -2   64.03   23.29
  13 -10  -1   15.90   10.30
  -3  13  -1   44.78   18.32
 -10  -3  -1   75.53   27.78
   3 -13  -1   69.73   20.49
 -13  10  -1   19.52   16.08
  13 -10   0    2.07    8.33
  -3  13   0    7.14    8.63
 -10  -3   0   15.20   15.18
   3 -13   0   12.80   10.85
 -10  -3   0    4.27    5.76
 -13  10   0   10.50    9.43
  13 -10   1   36.95   15.04
 -10  -3   1   12.08   15.56
  -3  13   1   61.35   18.29
   3 -13   1   36.03   15.40
 -10  -3   1   72.90   17.63
 -13  10   1   53.99   23.66
  13 -10   2   32.53   12.95
 -10  -3   2   71.99   26.54
  -3  13   2   92.85   20.97
   3 -13   2   61.35   19.49
 -10  -3   2   66.60   17.43
 -13  10   2   39.91   19.93
  13 -10   3   10.96    9.31
 -10  -3   3   25.73   16.94
   3 -13   3    7.35   10.60
  -3  13   3   18.14    9.63
 -10  -3   3   32.46   14.19
 -13  10   3   27.40   15.58
 -13  10   4  199.70   37.48
 -10  -3   4  179.13   37.85
   3 -13   4  143.88   29.11
 -10  -3   4  189.95   31.35
 -10  -3   5   18.31   14.86
   3 -13   5   48.05   20.76
 -10  -3   5   62.78   20.31
 -10  -3   6   43.94   19.96
   3 -13   6   57.73   21.24
 -10  -3   6   30.47   16.98
 -10  -3   7   31.11   15.40
   3 -13   7   12.32   12.07
 -10  -3   7   21.70   15.06
   3 -13   8   29.89   18.06
 -10  -3   8   20.33   13.95
   3 -13   9    5.63   13.19
 -10  -3   9   -1.57   10.18
   3 -13  10    4.47   11.11
 -10  -3  10  -10.35   15.05
   4 -13 -12    8.82   11.67
   4 -13 -11   -3.40   10.69
  -9  -4 -11    0.08   16.09
 -13   9 -11    7.20   11.95
  13  -9 -10   19.71   17.93
   4 -13 -10    5.50   10.83
  -9  -4 -10    6.54   13.14
 -13   9 -10   25.55   18.42
  13  -9  -9   63.20   25.01
   4 -13  -9   58.18   20.12
  -9  -4  -9   43.60   22.52
 -13   9  -9   81.33   26.04
  13  -9  -8   20.74   16.85
   4 -13  -8   40.14   18.37
  -9  -4  -8   15.67   15.95
 -13   9  -8   30.05   19.03
  13  -9  -7   86.28   26.57
   4 -13  -7   83.68   22.57
  -9  -4  -7   49.92   23.91
 -13   9  -7   50.60   19.99
  13  -9  -6   91.84   26.69
   4 -13  -6  123.92   26.78
  -9  -4  -6   93.48   32.00
 -13   9  -6  125.68   32.87
  13  -9  -5   47.71   19.42
   4 -13  -5   46.77   17.05
  -9  -4  -5   51.66   23.75
 -13   9  -5   86.89   28.74
  13  -9  -4  122.56   27.62
  -9  -4  -4  130.88   33.94
   4 -13  -4  158.73   28.74
 -13   9  -4  143.93   33.40
  13  -9  -3   65.83   21.89
  -9  -4  -3   32.92   18.74
   4 -13  -3   42.60   15.21
 -13   9  -3   33.38   16.36
  13  -9  -2   17.59   13.27
  -9  -4  -2   63.01   25.60
   4 -13  -2   20.81   12.27
 -13   9  -2   50.28   20.38
  -4  13  -1   86.95   22.26
  13  -9  -1   97.18   21.53
  -9  -4  -1  105.81   31.89
   4 -13  -1   64.64   18.65
  -9  -4  -1   62.10   14.15
 -13   9  -1   82.69   25.81
  -4  13   0    0.77    7.82
  13  -9   0   -1.21   10.41
  -9  -4   0   -8.48   15.19
   4 -13   0   -4.37    9.49
  -9  -4   0    2.34    5.91
 -13   9   0   -2.48   10.94
  -9  -4   1   75.80   26.94
  13  -9   1   92.47   19.65
  -4  13   1   67.57   18.98
   4 -13   1   66.82   20.08
  -9  -4   1   84.40   18.76
 -13   9   1   47.26   18.60
  -9  -4   2   83.86   26.63
  13  -9   2   50.32   14.06
  -4  13   2   51.18   16.19
   4 -13   2   47.21   18.34
  -9  -4   2   43.50   15.52
 -13   9   2   47.20   19.78
  -9  -4   3   70.46   27.32
  13  -9   3   60.51   15.16
  -4  13   3   62.31   16.66
   4 -13   3   39.13   17.74
  -9  -4   3   37.93   14.92
 -13   9   3   68.60   22.04
  -9  -4   4  103.99   29.60
   4 -13   4   85.69   22.58
  -9  -4   4  124.07   25.73
 -13   9   4  112.83   27.99
  -9  -4   5   46.17   19.14
   4 -13   5   41.92   17.65
  -9  -4   5   43.36   18.52
 -13   9   5   29.08   17.81
 -13   9   6   62.79   22.69
  -9  -4   6  109.59   28.79
   4 -13   6   98.94   27.30
  -9  -4   6  132.81   30.35
  -9  -4   7   73.40   24.00
   4 -13   7   85.64   27.44
  -9  -4   7   58.46   21.16
   4 -13   8    1.54   11.83
  -9  -4   8   53.53   21.79
   4 -13   9   63.06   24.16
  -9  -4   9   45.59   22.08
   9   4  10   15.88   16.16
   4 -13  10   14.73   16.60
  -9  -4  10   49.37   23.01
   4 -13  11    5.24   12.31
   5 -13 -11    8.78   14.37
  -8  -5 -11   18.53   16.47
   8   5 -11   10.89   11.38
 -13   8 -11   21.56   18.45
  13  -8 -10   40.25   22.72
   5 -13 -10   12.23   17.91
  -8  -5 -10   -4.41   11.41
   8   5 -10   14.97   12.15
 -13   8 -10    1.89   11.09
  13  -8  -9   59.26   23.26
   5 -13  -9   46.59   21.43
  -8  -5  -9   60.04   28.13
   8   5  -9   76.63   24.47
 -13   8  -9   31.06   18.80
  13  -8  -8   97.06   28.48
   5 -13  -8   75.95   24.54
  -8  -5  -8   28.17   16.92
   8   5  -8   54.74   18.99
 -13   8  -8   54.27   22.36
  13  -8  -7   42.95   20.57
   5 -13  -7   42.45   18.19
  -8  -5  -7   36.42   17.45
 -13   8  -7   22.95   17.12
  13  -8  -6   55.95   21.58
  -8  -5  -6   22.86   18.69
   5 -13  -6    2.75   13.49
 -13   8  -6    3.51   12.74
  13  -8  -5  134.02   29.31
  -8  -5  -5  120.23   33.82
   5 -13  -5   67.31   19.32
 -13   8  -5   70.32   25.38
  13  -8  -4  253.84   38.15
  -8  -5  -4  195.34   41.64
   5 -13  -4  188.55   30.99
 -13   8  -4  204.41   39.40
  13  -8  -3   56.00   19.82
  -8  -5  -3   65.10   27.00
   5 -13  -3   52.30   19.39
 -13   8  -3   52.64   21.57
  13  -8  -2   31.80   14.65
  -8  -5  -2   18.55   17.30
   5 -13  -2   16.45   12.28
  -8  -5  -2   26.73    9.96
 -13   8  -2   25.24   15.32
  -8  -5  -1  126.72   32.41
  13  -8  -1  135.48   24.08
   5 -13  -1  180.51   29.05
  -8  -5  -1  133.00   21.24
 -13   8  -1  119.72   29.43
  -5  13   0   32.37   13.93
  -8  -5   0    9.41   13.15
  13  -8   0   19.86   10.89
   5 -13   0   41.85   16.46
  -8  -5   0   32.37   12.40
 -13   8   0   21.26   15.66
  -8  -5   1  160.11   35.79
  -5  13   1  125.66   24.83
  13  -8   1  141.89   23.30
   5 -13   1  143.26   26.58
  -8  -5   1  150.34   25.17
 -13   8   1  135.72   31.05
  -8  -5   2   81.85   27.66
  13  -8   2   63.50   15.36
  -5  13   2   45.38   14.82
   5 -13   2   28.95   15.37
  -8  -5   2   57.29   17.97
 -13   8   2   52.95   19.95
  -8  -5   3   59.79   23.76
  13  -8   3   73.51   15.22
  -5  13   3   40.39   12.68
   5 -13   3   38.41   15.27
  -8  -5   3   37.23   16.65
 -13   8   3   38.80   18.86
  -8  -5   4  262.35   44.59
   5 -13   4  240.05   35.89
  -8  -5   4  194.74   32.81
 -13   8   4  240.68   40.34
  -8  -5   5  101.39   29.06
   5 -13   5   99.16   24.43
  -8  -5   5   79.74   23.19
 -13   8   5   64.91   23.18
  -8  -5   6   11.26   11.60
   5 -13   6    7.74   13.67
  -8  -5   6   29.73   13.74
 -13   8   6   38.24   17.02
  -8  -5   7    2.07    8.68
   5 -13   7   23.50   15.48
 -13   8   7   12.56   11.44
   5 -13   8   66.96   24.33
  -8  -5   8   84.38   25.52
   5 -13   9   69.46   26.01
  -8  -5   9   75.79   25.47
   8   5   9   52.59   25.75
[truncated: 119,514 more chars]
