# Supplementary material for: Construction of Two Stable Co(II)-Based Hydrogen-Bonded Organic Frameworks as a Luminescent Probe for Recognition of Fe3+ and Cr2O72− in H2O
Source: Molecules. 2021 Sep 30;26(19):5955. doi: 10.3390/molecules26195955 (PMC8513017; doi:10.3390/molecules26195955)
Supplement: Supplementary file 1 [file molecules-26-05955-s001.zip › 2.cif]

data_lfx38
_audit_creation_date               2021-08-25
_audit_creation_method
;
Olex2 1.3
(compiled 2020.11.12 svn.r5f609507 for OlexSys, GUI svn.r6272)
;
_shelx_SHELXL_version_number       '2018/3'
_audit_contact_author_address      ?
_audit_contact_author_email        ?
_audit_contact_author_name         ''
_audit_contact_author_phone        ?
_publ_contact_author_id_orcid      ?
_publ_section_references
;
Dolomanov, O.V., Bourhis, L.J., Gildea, R.J, Howard, J.A.K. & Puschmann, H.
 (2009), J. Appl. Cryst. 42, 339-341.

Sheldrick, G.M. (2015). Acta Cryst. C71, 3-8.
;
_chemical_name_common              ?
_chemical_name_systematic          ?
_chemical_formula_moiety           'C56 H44 Cl4 Co2 N8 O8'
_chemical_formula_sum              'C56 H44 Cl4 Co2 N8 O8'
_chemical_formula_weight           1216.65
_chemical_melting_point            ?
_chemical_oxdiff_formula           'C1 H1 N1 O1'
loop_
  _atom_type_symbol
  _atom_type_description
  _atom_type_scat_dispersion_real
  _atom_type_scat_dispersion_imag
  _atom_type_scat_source
 'C' 'C' 0.0033 0.0016 'International Tables Vol C Tables 4.2.6.8 and 6.1.1.4'
 'H' 'H' 0.0000 0.0000 'International Tables Vol C Tables 4.2.6.8 and 6.1.1.4'
 'Cl' 'Cl' 0.1484 0.1585 'International Tables Vol C Tables 4.2.6.8 and 6.1.1.4'
 'Co' 'Co' 0.3494 0.9721 'International Tables Vol C Tables 4.2.6.8 and 6.1.1.4'
 'N' 'N' 0.0061 0.0033 'International Tables Vol C Tables 4.2.6.8 and 6.1.1.4'
 'O' 'O' 0.0106 0.0060 'International Tables Vol C Tables 4.2.6.8 and 6.1.1.4'

_shelx_space_group_comment
;
The symmetry employed for this shelxl refinement is uniquely defined
by the following loop, which should always be used as a source of
symmetry information in preference to the above space-group names.
They are only intended as comments.
;
_space_group_crystal_system        'triclinic'
_space_group_IT_number             2
_space_group_name_H-M_alt          'P -1'
_space_group_name_Hall             '-P 1'
loop_
  _space_group_symop_operation_xyz
 'x, y, z'
 '-x, -y, -z'

_cell_length_a                     10.0331(8)
_cell_length_b                     12.8050(11)
_cell_length_c                     13.1684(14)
_cell_angle_alpha                  63.495(10)
_cell_angle_beta                   80.368(8)
_cell_angle_gamma                  67.362(8)
_cell_volume                       1397.3(3)
_cell_formula_units_Z              1
_cell_measurement_reflns_used      1171
_cell_measurement_temperature      296.15
_cell_measurement_theta_max        20.7470
_cell_measurement_theta_min        3.7840
_shelx_estimated_absorpt_T_max     0.920
_shelx_estimated_absorpt_T_min     0.849
_exptl_absorpt_coefficient_mu      0.846
_exptl_absorpt_correction_T_max    1.00000
_exptl_absorpt_correction_T_min    0.98285
_exptl_absorpt_correction_type     multi-scan
_exptl_absorpt_process_details
;
CrysAlisPro, Agilent Technologies,
Version 1.171.37.35 (release 13-08-2014 CrysAlis171 .NET)
(compiled Aug 13 2014,18:06:01)
Empirical absorption correction using spherical harmonics,
 implemented in SCALE3 ABSPACK scaling algorithm.
;
_exptl_absorpt_special_details     ?
_exptl_crystal_colour              red
_exptl_crystal_density_diffrn      1.446
_exptl_crystal_density_meas        ?
_exptl_crystal_density_method      ?
_exptl_crystal_description         'block'
_exptl_crystal_F_000               622
_exptl_crystal_size_max            0.2
_exptl_crystal_size_mid            0.15
_exptl_crystal_size_min            0.1
_exptl_transmission_factor_max     ?
_exptl_transmission_factor_min     ?
_diffrn_reflns_av_R_equivalents    0.0503
_diffrn_reflns_av_unetI/netI       0.1152
_diffrn_reflns_Laue_measured_fraction_full  0.998
_diffrn_reflns_Laue_measured_fraction_max  0.998
_diffrn_reflns_limit_h_max         11
_diffrn_reflns_limit_h_min         -11
_diffrn_reflns_limit_k_max         15
_diffrn_reflns_limit_k_min         -15
_diffrn_reflns_limit_l_max         15
_diffrn_reflns_limit_l_min         -13
_diffrn_reflns_number              8706
_diffrn_reflns_point_group_measured_fraction_full  0.998
_diffrn_reflns_point_group_measured_fraction_max  0.998
_diffrn_reflns_theta_full          25.096
_diffrn_reflns_theta_max           25.096
_diffrn_reflns_theta_min           3.303
_diffrn_ambient_temperature        296.15
_diffrn_detector                   'CCD plate'
_diffrn_detector_area_resol_mean   16.0233
_diffrn_detector_type              Eos
_diffrn_measured_fraction_theta_full  0.998
_diffrn_measured_fraction_theta_max  0.998
_diffrn_measurement_details
;
#__ type_ start__ end____ width___ exp.time_
  1 omega   35.00   71.00   1.0000    2.5000
omega____ theta____ kappa____ phi______ frames
    -       18.7829 -120.0000    4.0000 36

#__ type_ start__ end____ width___ exp.time_
  2 omega  -85.00    9.00   1.0000    2.5000
omega____ theta____ kappa____ phi______ frames
    -      -18.8610  -77.0000   60.0000 94

#__ type_ start__ end____ width___ exp.time_
  3 omega  -25.00    2.00   1.0000    2.5000
omega____ theta____ kappa____ phi______ frames
    -      -18.8610  -57.0000 -180.0000 27

#__ type_ start__ end____ width___ exp.time_
  4 omega  -49.00   50.00   1.0000    2.5000
omega____ theta____ kappa____ phi______ frames
    -      -18.8610   77.0000 -180.0000 99

#__ type_ start__ end____ width___ exp.time_
  5 omega  -88.00   14.00   1.0000    2.5000
omega____ theta____ kappa____ phi______ frames
    -      -18.8610  -19.0000 -120.0000 102
;
_diffrn_measurement_device         'four-circle diffractometer'
_diffrn_measurement_device_type    'SuperNova, Single source at offset, Eos'
_diffrn_measurement_method         '\w scans'
_diffrn_orient_matrix_UB_11        0.0222088000
_diffrn_orient_matrix_UB_12        -0.0241980000
_diffrn_orient_matrix_UB_13        -0.0415912000
_diffrn_orient_matrix_UB_21        -0.0102510000
_diffrn_orient_matrix_UB_22        0.0609406000
_diffrn_orient_matrix_UB_23        -0.0429431000
_diffrn_orient_matrix_UB_31        0.0725880000
_diffrn_orient_matrix_UB_32        -0.0085257000
_diffrn_orient_matrix_UB_33        0.0070037000
_diffrn_radiation_monochromator    mirror
_diffrn_radiation_probe            x-ray
_diffrn_radiation_type             MoK\a
_diffrn_radiation_wavelength       0.71073
_diffrn_source                     'SuperNova (Mo) X-ray Source'
_reflns_Friedel_coverage           0.000
_reflns_Friedel_fraction_full      .
_reflns_Friedel_fraction_max       .
_reflns_number_gt                  2701
_reflns_number_total               4961
_reflns_odcompleteness_completeness  99.82
_reflns_odcompleteness_iscentric   1
_reflns_odcompleteness_theta       26.32
_reflns_special_details
;
 Reflections were merged by SHELXL according to the crystal
 class for the calculation of statistics and refinement.
 
 _reflns_Friedel_fraction is defined as the number of unique
 Friedel pairs measured divided by the number that would be
 possible theoretically, ignoring centric projections and
 systematic absences.
;
_reflns_threshold_expression       'I > 2\s(I)'
_computing_cell_refinement
;
CrysAlisPro, Agilent Technologies,
Version 1.171.37.35 (release 13-08-2014 CrysAlis171 .NET)
(compiled Aug 13 2014,18:06:01)
;
_computing_data_collection
;
CrysAlisPro, Agilent Technologies,
Version 1.171.37.35 (release 13-08-2014 CrysAlis171 .NET)
(compiled Aug 13 2014,18:06:01)
;
_computing_data_reduction
;
CrysAlisPro, Agilent Technologies,
Version 1.171.37.35 (release 13-08-2014 CrysAlis171 .NET)
(compiled Aug 13 2014,18:06:01)
;
_computing_molecular_graphics      'Olex2 1.3 (Dolomanov et al., 2009)'
_computing_publication_material    'Olex2 1.3 (Dolomanov et al., 2009)'
_computing_structure_refinement    'SHELXL 2018/3 (Sheldrick, 2015)'
_computing_structure_solution      'ShelXT (Sheldrick, 2015)'
_refine_diff_density_max           0.540
_refine_diff_density_min           -0.589
_refine_diff_density_rms           0.072
_refine_ls_extinction_coef         .
_refine_ls_extinction_method       none
_refine_ls_goodness_of_fit_ref     1.047
_refine_ls_hydrogen_treatment      constr
_refine_ls_matrix_type             full
_refine_ls_number_parameters       352
_refine_ls_number_reflns           4961
_refine_ls_number_restraints       0
_refine_ls_R_factor_all            0.1366
_refine_ls_R_factor_gt             0.0690
_refine_ls_restrained_S_all        1.047
_refine_ls_shift/su_max            0.000
_refine_ls_shift/su_mean           0.000
_refine_ls_structure_factor_coef   Fsqd
_refine_ls_weighting_details      
 'w=1/[\s^2^(Fo^2^)+(0.0434P)^2^+0.4670P] where P=(Fo^2^+2Fc^2^)/3'
_refine_ls_weighting_scheme        calc
_refine_ls_wR_factor_gt            0.1252
_refine_ls_wR_factor_ref           0.1671
_refine_special_details            ?
_olex2_refinement_description
;
1. Fixed Uiso
 At 1.2 times of:
  All C(H) groups, All C(H,H) groups
2.a Secondary CH2 refined with riding coordinates:
 C18(H18A,H18B), C25(H25A,H25B)
2.b Aromatic/amide H refined with riding coordinates:
 C10(H10), C11(H11), C13(H13), C14(H14), C15(H15), C16(H16), C17(H17),
 C20(H20), C21(H21), C23(H23), C24(H24), C26(H26), C27(H27), C28(H28), C3(H3),
 C4(H4), C7(H7), C6(H6)
;
_atom_sites_solution_hydrogens     geom
_atom_sites_solution_primary       dual
_atom_sites_solution_secondary     ?
loop_
  _atom_site_label
  _atom_site_type_symbol
  _atom_site_fract_x
  _atom_site_fract_y
  _atom_site_fract_z
  _atom_site_U_iso_or_equiv
  _atom_site_adp_type
  _atom_site_occupancy
  _atom_site_site_symmetry_order
  _atom_site_calc_flag
  _atom_site_refinement_flags_posn
  _atom_site_refinement_flags_adp
  _atom_site_refinement_flags_occupancy
  _atom_site_disorder_assembly
  _atom_site_disorder_group
 Co1 Co 0.41024(7) 0.49422(6) 0.32566(6) 0.0471(3) Uani 1 1 d . . . . .
 Cl2 Cl 1.30583(19) 0.0511(2) 0.4867(2) 0.1277(9) Uani 1 1 d . . . . .
 O1 O 0.3584(4) 0.6734(3) 0.2865(3) 0.0530(10) Uani 1 1 d . . . . .
 O2 O 0.1575(4) 0.6549(3) 0.2651(3) 0.0608(11) Uani 1 1 d . . . . .
 O3 O 0.6108(4) 0.4005(3) 0.3791(3) 0.0619(11) Uani 1 1 d . . . . .
 O4 O 0.7017(4) 0.5039(3) 0.2162(3) 0.0638(12) Uani 1 1 d . . . . .
 N1 N 0.3201(4) 0.4085(4) 0.4727(4) 0.0441(11) Uani 1 1 d . . . . .
 N2 N 0.2990(5) 0.3087(4) 0.6563(4) 0.0462(11) Uani 1 1 d . . . . .
 N3 N 0.5457(5) -0.3650(4) 0.9217(4) 0.0493(12) Uani 1 1 d . . . . .
 N4 N 0.6073(5) -0.4496(4) 0.7999(4) 0.0460(12) Uani 1 1 d . . . . .
 C1 C 0.2239(6) 0.7202(5) 0.2625(5) 0.0461(14) Uani 1 1 d . . . . .
 C2 C 0.1505(5) 0.8564(5) 0.2277(5) 0.0488(14) Uani 1 1 d . . . . .
 C8 C 0.7146(6) 0.4211(5) 0.3139(5) 0.0486(14) Uani 1 1 d . . . . .
 C9 C 0.8631(6) 0.3323(5) 0.3596(5) 0.0514(15) Uani 1 1 d . . . . .
 C10 C 0.9852(6) 0.3498(6) 0.3007(6) 0.0695(19) Uani 1 1 d . . . . .
 H10 H 0.976615 0.419999 0.232699 0.083 Uiso 1 1 calc R U . . .
 C11 C 1.1209(6) 0.2638(7) 0.3418(7) 0.083(2) Uani 1 1 d . . . . .
 H11 H 1.203145 0.276602 0.302095 0.099 Uiso 1 1 calc R U . . .
 C12 C 1.1330(7) 0.1619(7) 0.4391(6) 0.072(2) Uani 1 1 d . . . . .
 C13 C 1.0159(7) 0.1409(7) 0.5018(6) 0.100(3) Uani 1 1 d . . . . .
 H13 H 1.025890 0.070815 0.570144 0.119 Uiso 1 1 calc R U . . .
 C14 C 0.8800(7) 0.2290(6) 0.4592(6) 0.086(2) Uani 1 1 d . . . . .
 H14 H 0.798300 0.216617 0.500379 0.104 Uiso 1 1 calc R U . . .
 C15 C 0.3866(6) 0.3494(4) 0.5722(5) 0.0472(14) Uani 1 1 d . . . . .
 H15 H 0.481698 0.337739 0.582123 0.057 Uiso 1 1 calc R U . . .
 C16 C 0.1840(6) 0.4059(5) 0.4969(5) 0.0614(18) Uani 1 1 d . . . . .
 H16 H 0.111143 0.442396 0.443382 0.074 Uiso 1 1 calc R U . . .
 C17 C 0.1694(6) 0.3436(5) 0.6085(6) 0.0652(19) Uani 1 1 d . . . . .
 H17 H 0.087524 0.327316 0.645933 0.078 Uiso 1 1 calc R U . . .
 C18 C 0.3357(7) 0.2420(5) 0.7760(5) 0.0595(17) Uani 1 1 d . . . . .
 H18A H 0.256634 0.277249 0.818124 0.071 Uiso 1 1 calc R U . . .
 H18B H 0.420098 0.254831 0.787850 0.071 Uiso 1 1 calc R U . . .
 C19 C 0.3668(5) 0.1026(5) 0.8238(5) 0.0447(14) Uani 1 1 d . . . . .
 C20 C 0.4246(6) 0.0350(5) 0.7609(5) 0.0604(17) Uani 1 1 d . . . . .
 H20 H 0.442208 0.075007 0.684078 0.073 Uiso 1 1 calc R U . . .
 C21 C 0.4574(6) -0.0937(5) 0.8111(5) 0.0607(17) Uani 1 1 d . . . . .
 H21 H 0.495830 -0.138448 0.767080 0.073 Uiso 1 1 calc R U . . .
 C22 C 0.4341(6) -0.1549(4) 0.9238(5) 0.0449(14) Uani 1 1 d . . . . .
 C23 C 0.3780(6) -0.0871(5) 0.9868(5) 0.0525(15) Uani 1 1 d . . . . .
 H23 H 0.362984 -0.127666 1.064055 0.063 Uiso 1 1 calc R U . . .
 C24 C 0.3435(6) 0.0401(5) 0.9379(5) 0.0490(14) Uani 1 1 d . . . . .
 H24 H 0.304086 0.084523 0.982213 0.059 Uiso 1 1 calc R U . . .
 C25 C 0.4594(7) -0.2931(4) 0.9843(5) 0.0595(17) Uani 1 1 d . . . . .
 H25A H 0.506769 -0.326371 1.056293 0.071 Uiso 1 1 calc R U . . .
 H25B H 0.366467 -0.304018 1.000577 0.071 Uiso 1 1 calc R U . . .
 C26 C 0.4999(6) -0.3783(5) 0.8398(5) 0.0524(15) Uani 1 1 d . . . . .
 H26 H 0.404902 -0.342116 0.814184 0.063 Uiso 1 1 calc R U . . .
 C27 C 0.6911(6) -0.4321(5) 0.9352(6) 0.0641(18) Uani 1 1 d . . . . .
 H27 H 0.753046 -0.440697 0.985907 0.077 Uiso 1 1 calc R U . . .
 C28 C 0.7255(6) -0.4827(5) 0.8607(5) 0.0558(16) Uani 1 1 d . . . . .
 H28 H 0.817710 -0.533601 0.851521 0.067 Uiso 1 1 calc R U . . .
 C3 C 0.2137(6) 0.9265(5) 0.2432(5) 0.0549(15) Uani 1 1 d . . . . .
 H3 H 0.302068 0.886895 0.280806 0.066 Uiso 1 1 calc R U . . .
 C4 C 0.1498(7) 1.0529(5) 0.2046(5) 0.073(2) Uani 1 1 d . . . . .
 H4 H 0.193173 1.099173 0.216193 0.087 Uiso 1 1 calc R U . . .
 C7 C 0.0195(6) 0.9161(6) 0.1713(6) 0.077(2) Uani 1 1 d . . . . .
 H7 H -0.024360 0.870264 0.159442 0.092 Uiso 1 1 calc R U . . .
 C6 C -0.0461(8) 1.0433(7) 0.1327(7) 0.100(3) Uani 1 1 d . . . . .
 H6 H -0.135123 1.083542 0.096066 0.121 Uiso 1 1 calc R U . . .
 C5 C 0.0199(8) 1.1102(6) 0.1484(6) 0.087(2) Uani 1 1 d . . . . .
 Cl1 Cl -0.0618(3) 1.27005(18) 0.0940(2) 0.1690(14) Uani 1 1 d . . . . .

loop_
  _atom_site_aniso_label
  _atom_site_aniso_U_11
  _atom_site_aniso_U_22
  _atom_site_aniso_U_33
  _atom_site_aniso_U_23
  _atom_site_aniso_U_13
  _atom_site_aniso_U_12
 Co1 0.0478(4) 0.0411(5) 0.0438(5) -0.0100(4) -0.0026(4) -0.0153(4)
 Cl2 0.0620(11) 0.160(2) 0.121(2) -0.0613(17) -0.0266(12) 0.0152(12)
 O1 0.046(2) 0.043(2) 0.058(3) -0.0131(19) -0.0083(19) -0.0110(19)
 O2 0.062(2) 0.056(2) 0.065(3) -0.021(2) -0.001(2) -0.026(2)
 O3 0.044(2) 0.068(3) 0.057(3) -0.015(2) -0.004(2) -0.015(2)
 O4 0.071(3) 0.054(3) 0.055(3) -0.013(2) -0.009(2) -0.018(2)
 N1 0.041(2) 0.039(3) 0.045(3) -0.013(2) -0.001(2) -0.012(2)
 N2 0.058(3) 0.039(3) 0.038(3) -0.009(2) 0.001(2) -0.021(2)
 N3 0.063(3) 0.034(3) 0.050(3) -0.010(2) -0.008(3) -0.021(2)
 N4 0.052(3) 0.037(3) 0.042(3) -0.005(2) -0.005(2) -0.020(2)
 C1 0.050(3) 0.037(3) 0.045(4) -0.017(3) 0.000(3) -0.010(3)
 C2 0.048(3) 0.050(4) 0.040(4) -0.019(3) -0.002(3) -0.007(3)
 C8 0.051(3) 0.047(4) 0.051(4) -0.021(3) -0.006(3) -0.017(3)
 C9 0.049(3) 0.059(4) 0.044(4) -0.021(3) -0.004(3) -0.016(3)
 C10 0.059(4) 0.068(4) 0.074(5) -0.018(4) 0.003(4) -0.029(4)
 C11 0.044(4) 0.103(6) 0.109(7) -0.053(5) 0.009(4) -0.027(4)
 C12 0.050(4) 0.086(5) 0.072(5) -0.038(4) -0.015(4) -0.003(4)
 C13 0.060(4) 0.117(6) 0.066(5) -0.003(5) -0.002(4) -0.016(5)
 C14 0.053(4) 0.096(5) 0.064(5) -0.008(4) 0.002(3) -0.012(4)
 C15 0.050(3) 0.039(3) 0.051(4) -0.009(3) -0.009(3) -0.021(3)
 C16 0.045(3) 0.052(4) 0.064(5) -0.007(3) -0.010(3) -0.010(3)
 C17 0.052(4) 0.057(4) 0.071(5) -0.008(3) 0.004(3) -0.027(3)
 C18 0.087(4) 0.044(3) 0.041(4) -0.011(3) -0.005(3) -0.024(3)
 C19 0.058(3) 0.041(3) 0.034(3) -0.010(3) -0.002(3) -0.022(3)
 C20 0.095(5) 0.045(3) 0.035(4) -0.009(3) 0.016(3) -0.034(3)
 C21 0.094(5) 0.046(4) 0.038(4) -0.019(3) 0.013(3) -0.025(3)
 C22 0.059(3) 0.039(3) 0.036(3) -0.011(3) -0.003(3) -0.021(3)
 C23 0.078(4) 0.047(3) 0.033(3) -0.008(3) 0.006(3) -0.035(3)
 C24 0.068(4) 0.041(3) 0.039(4) -0.018(3) 0.007(3) -0.022(3)
 C25 0.091(4) 0.035(3) 0.045(4) -0.012(3) 0.001(3) -0.020(3)
 C26 0.051(3) 0.040(3) 0.061(4) -0.016(3) -0.012(3) -0.012(3)
 C27 0.066(4) 0.056(4) 0.071(5) -0.024(4) -0.020(4) -0.017(3)
 C28 0.046(3) 0.052(4) 0.064(5) -0.019(3) -0.008(3) -0.016(3)
 C3 0.062(4) 0.052(4) 0.045(4) -0.022(3) -0.007(3) -0.010(3)
 C4 0.088(5) 0.047(4) 0.069(5) -0.024(3) -0.019(4) -0.002(4)
 C7 0.051(4) 0.065(5) 0.105(6) -0.034(4) -0.020(4) -0.004(4)
 C6 0.078(5) 0.091(6) 0.119(7) -0.056(5) -0.048(5) 0.018(5)
 C5 0.100(6) 0.048(4) 0.087(6) -0.031(4) -0.034(5) 0.019(4)
 Cl1 0.232(3) 0.0588(13) 0.174(3) -0.0481(15) -0.119(2) 0.0393(16)

_geom_special_details
;
 All esds (except the esd in the dihedral angle between two l.s. planes)
 are estimated using the full covariance matrix.  The cell esds are taken
 into account individually in the estimation of esds in distances, angles
 and torsion angles; correlations between esds in cell parameters are only
 used when they are defined by crystal symmetry.  An approximate (isotropic)
 treatment of cell esds is used for estimating esds involving l.s. planes.
;
loop_
  _geom_bond_atom_site_label_1
  _geom_bond_atom_site_label_2
  _geom_bond_distance
  _geom_bond_site_symmetry_2
  _geom_bond_publ_flag
 Co1 O1 1.978(3) . ?
 Co1 O3 1.961(3) . ?
 Co1 N1 2.013(4) . ?
 Co1 N4 2.028(5) 2_656 ?
 Cl2 C12 1.757(6) . ?
 O1 C1 1.277(6) . ?
 O2 C1 1.240(6) . ?
 O3 C8 1.265(6) . ?
 O4 C8 1.236(6) . ?
 N1 C15 1.324(6) . ?
 N1 C16 1.359(6) . ?
 N2 C15 1.335(6) . ?
 N2 C17 1.364(6) . ?
 N2 C18 1.450(6) . ?
 N3 C25 1.449(7) . ?
 N3 C26 1.340(7) . ?
 N3 C27 1.373(7) . ?
 N4 C26 1.323(7) . ?
 N4 C28 1.362(6) . ?
 C1 C2 1.485(7) . ?
 C2 C3 1.377(7) . ?
 C2 C7 1.382(7) . ?
 C8 C9 1.503(7) . ?
 C9 C10 1.375(7) . ?
 C9 C14 1.361(7) . ?
 C10 H10 0.9300 . ?
 C10 C11 1.386(8) . ?
 C11 H11 0.9300 . ?
 C11 C12 1.340(9) . ?
 C12 C13 1.363(8) . ?
 C13 H13 0.9300 . ?
 C13 C14 1.397(8) . ?
 C14 H14 0.9300 . ?
 C15 H15 0.9300 . ?
 C16 H16 0.9300 . ?
 C16 C17 1.338(8) . ?
 C17 H17 0.9300 . ?
 C18 H18A 0.9700 . ?
 C18 H18B 0.9700 . ?
 C18 C19 1.521(7) . ?
 C19 C20 1.366(7) . ?
 C19 C24 1.381(7) . ?
 C20 H20 0.9300 . ?
 C20 C21 1.394(7) . ?
 C21 H21 0.9300 . ?
 C21 C22 1.363(7) . ?
 C22 C23 1.368(7) . ?
 C22 C25 1.514(6) . ?
 C23 H23 0.9300 . ?
 C23 C24 1.376(6) . ?
 C24 H24 0.9300 . ?
 C25 H25A 0.9700 . ?
 C25 H25B 0.9700 . ?
 C26 H26 0.9300 . ?
 C27 H27 0.9300 . ?
 C27 C28 1.335(8) . ?
 C28 H28 0.9300 . ?
 C3 H3 0.9300 . ?
 C3 C4 1.366(7) . ?
 C4 H4 0.9300 . ?
 C4 C5 1.373(8) . ?
 C7 H7 0.9300 . ?
 C7 C6 1.376(8) . ?
 C6 H6 0.9300 . ?
 C6 C5 1.361(9) . ?
 C5 Cl1 1.724(6) . ?

loop_
  _geom_angle_atom_site_label_1
  _geom_angle_atom_site_label_2
  _geom_angle_atom_site_label_3
  _geom_angle
  _geom_angle_site_symmetry_1
  _geom_angle_site_symmetry_3
  _geom_angle_publ_flag
 O1 Co1 N1 111.84(16) . . ?
 O1 Co1 N4 116.81(16) . 2_656 ?
 O3 Co1 O1 110.89(15) . . ?
 O3 Co1 N1 95.96(16) . . ?
 O3 Co1 N4 105.53(17) . 2_656 ?
 N1 Co1 N4 113.56(17) . 2_656 ?
 C1 O1 Co1 104.0(3) . . ?
 C8 O3 Co1 120.9(4) . . ?
 C15 N1 Co1 123.4(4) . . ?
 C15 N1 C16 105.1(5) . . ?
 C16 N1 Co1 131.2(4) . . ?
 C15 N2 C17 107.3(5) . . ?
 C15 N2 C18 125.7(5) . . ?
 C17 N2 C18 127.0(5) . . ?
 C26 N3 C25 127.0(5) . . ?
 C26 N3 C27 106.9(5) . . ?
 C27 N3 C25 126.1(5) . . ?
 C26 N4 Co1 125.3(4) . 2_656 ?
 C26 N4 C28 105.0(5) . . ?
 C28 N4 Co1 129.7(4) . 2_656 ?
 O1 C1 C2 117.7(5) . . ?
 O2 C1 O1 121.3(5) . . ?
 O2 C1 C2 121.0(5) . . ?
 C3 C2 C1 121.9(5) . . ?
 C3 C2 C7 118.8(5) . . ?
 C7 C2 C1 119.2(5) . . ?
 O3 C8 C9 115.8(5) . . ?
 O4 C8 O3 125.0(5) . . ?
 O4 C8 C9 119.1(6) . . ?
 C10 C9 C8 121.5(5) . . ?
 C14 C9 C8 120.4(6) . . ?
 C14 C9 C10 118.0(5) . . ?
 C9 C10 H10 119.7 . . ?
 C9 C10 C11 120.6(6) . . ?
 C11 C10 H10 119.7 . . ?
 C10 C11 H11 120.2 . . ?
 C12 C11 C10 119.7(6) . . ?
 C12 C11 H11 120.2 . . ?
 C11 C12 Cl2 118.8(6) . . ?
 C11 C12 C13 122.2(6) . . ?
 C13 C12 Cl2 118.9(6) . . ?
 C12 C13 H13 121.4 . . ?
 C12 C13 C14 117.2(6) . . ?
 C14 C13 H13 121.4 . . ?
 C9 C14 C13 122.2(6) . . ?
 C9 C14 H14 118.9 . . ?
 C13 C14 H14 118.9 . . ?
 N1 C15 N2 111.0(5) . . ?
 N1 C15 H15 124.5 . . ?
 N2 C15 H15 124.5 . . ?
 N1 C16 H16 124.7 . . ?
 C17 C16 N1 110.6(5) . . ?
 C17 C16 H16 124.7 . . ?
 N2 C17 H17 127.0 . . ?
 C16 C17 N2 106.0(5) . . ?
 C16 C17 H17 127.0 . . ?
 N2 C18 H18A 108.7 . . ?
 N2 C18 H18B 108.7 . . ?
 N2 C18 C19 114.1(5) . . ?
 H18A C18 H18B 107.6 . . ?
 C19 C18 H18A 108.7 . . ?
 C19 C18 H18B 108.7 . . ?
 C20 C19 C18 123.2(5) . . ?
 C20 C19 C24 118.3(5) . . ?
 C24 C19 C18 118.3(5) . . ?
 C19 C20 H20 119.8 . . ?
 C19 C20 C21 120.5(5) . . ?
 C21 C20 H20 119.8 . . ?
 C20 C21 H21 119.5 . . ?
 C22 C21 C20 121.0(5) . . ?
 C22 C21 H21 119.5 . . ?
 C21 C22 C23 118.4(5) . . ?
 C21 C22 C25 124.7(5) . . ?
 C23 C22 C25 116.9(5) . . ?
 C22 C23 H23 119.4 . . ?
 C22 C23 C24 121.2(5) . . ?
 C24 C23 H23 119.4 . . ?
 C19 C24 H24 119.7 . . ?
 C23 C24 C19 120.7(5) . . ?
 C23 C24 H24 119.7 . . ?
 N3 C25 C22 114.6(5) . . ?
 N3 C25 H25A 108.6 . . ?
 N3 C25 H25B 108.6 . . ?
 C22 C25 H25A 108.6 . . ?
 C22 C25 H25B 108.6 . . ?
 H25A C25 H25B 107.6 . . ?
 N3 C26 H26 124.4 . . ?
 N4 C26 N3 111.3(5) . . ?
 N4 C26 H26 124.4 . . ?
 N3 C27 H27 127.0 . . ?
 C28 C27 N3 106.0(5) . . ?
 C28 C27 H27 127.0 . . ?
 N4 C28 H28 124.6 . . ?
 C27 C28 N4 110.9(5) . . ?
 C27 C28 H28 124.6 . . ?
 C2 C3 H3 119.2 . . ?
 C4 C3 C2 121.6(5) . . ?
 C4 C3 H3 119.2 . . ?
 C3 C4 H4 120.8 . . ?
 C3 C4 C5 118.5(6) . . ?
 C5 C4 H4 120.8 . . ?
 C2 C7 H7 120.0 . . ?
 C6 C7 C2 119.9(6) . . ?
 C6 C7 H7 120.0 . . ?
 C7 C6 H6 120.1 . . ?
 C5 C6 C7 119.8(6) . . ?
 C5 C6 H6 120.1 . . ?
 C4 C5 Cl1 120.1(6) . . ?
 C6 C5 C4 121.4(6) . . ?
 C6 C5 Cl1 118.5(6) . . ?

loop_
  _geom_hbond_atom_site_label_D
  _geom_hbond_atom_site_label_H
  _geom_hbond_atom_site_label_A
  _geom_hbond_distance_DH
  _geom_hbond_distance_HA
  _geom_hbond_distance_DA
  _geom_hbond_angle_DHA
  _geom_hbond_site_symmetry_A
  _geom_hbond_publ_flag
 C15 H15 O1 0.93 2.47 3.261(6) 142.4 2_666 yes
 C17 H17 O2 0.93 2.51 3.417(7) 164.5 2_566 yes
 C18 H18B O1 0.97 2.60 3.491(7) 152.0 2_666 yes
 C23 H23 O1 0.93 2.91 3.798(6) 160.5 1_546 yes
 C25 H25A O4 0.97 2.65 3.539(7) 153.2 1_546 yes
 C27 H27 O4 0.93 2.79 3.425(8) 126.1 1_546 yes

loop_
  _geom_torsion_atom_site_label_1
  _geom_torsion_atom_site_label_2
  _geom_torsion_atom_site_label_3
  _geom_torsion_atom_site_label_4
  _geom_torsion
  _geom_torsion_site_symmetry_1
  _geom_torsion_site_symmetry_2
  _geom_torsion_site_symmetry_3
  _geom_torsion_site_symmetry_4
  _geom_torsion_publ_flag
 Co1 O1 C1 O2 -1.4(6) . . . . ?
 Co1 O1 C1 C2 -179.4(4) . . . . ?
 Co1 O3 C8 O4 4.5(8) . . . . ?
 Co1 O3 C8 C9 -172.3(3) . . . . ?
 Co1 N1 C15 N2 175.6(3) . . . . ?
 Co1 N1 C16 C17 -175.6(4) . . . . ?
 Co1 N4 C26 N3 -179.3(3) 2_656 . . . ?
 Co1 N4 C28 C27 179.3(4) 2_656 . . . ?
 Cl2 C12 C13 C14 -177.8(6) . . . . ?
 O1 C1 C2 C3 -13.7(9) . . . . ?
 O1 C1 C2 C7 161.8(5) . . . . ?
 O2 C1 C2 C3 168.3(6) . . . . ?
 O2 C1 C2 C7 -16.1(9) . . . . ?
 O3 C8 C9 C10 -175.1(6) . . . . ?
 O3 C8 C9 C14 7.4(8) . . . . ?
 O4 C8 C9 C10 7.8(9) . . . . ?
 O4 C8 C9 C14 -169.6(6) . . . . ?
 N1 C16 C17 N2 1.6(7) . . . . ?
 N2 C18 C19 C20 30.7(8) . . . . ?
 N2 C18 C19 C24 -153.3(5) . . . . ?
 N3 C27 C28 N4 0.3(7) . . . . ?
 C1 C2 C3 C4 175.8(5) . . . . ?
 C1 C2 C7 C6 -176.3(6) . . . . ?
 C2 C3 C4 C5 -0.6(10) . . . . ?
 C2 C7 C6 C5 1.3(12) . . . . ?
 C8 C9 C10 C11 -177.0(6) . . . . ?
 C8 C9 C14 C13 176.7(7) . . . . ?
 C9 C10 C11 C12 0.8(11) . . . . ?
 C10 C9 C14 C13 -0.8(11) . . . . ?
 C10 C11 C12 Cl2 177.5(5) . . . . ?
 C10 C11 C12 C13 -1.8(12) . . . . ?
 C11 C12 C13 C14 1.5(12) . . . . ?
 C12 C13 C14 C9 -0.2(12) . . . . ?
 C14 C9 C10 C11 0.5(10) . . . . ?
 C15 N1 C16 C17 -1.6(7) . . . . ?
 C15 N2 C17 C16 -0.9(7) . . . . ?
 C15 N2 C18 C19 -103.3(6) . . . . ?
 C16 N1 C15 N2 1.0(6) . . . . ?
 C17 N2 C15 N1 -0.1(6) . . . . ?
 C17 N2 C18 C19 78.0(7) . . . . ?
 C18 N2 C15 N1 -179.0(5) . . . . ?
 C18 N2 C17 C16 178.0(5) . . . . ?
 C18 C19 C20 C21 176.7(5) . . . . ?
 C18 C19 C24 C23 -176.1(5) . . . . ?
 C19 C20 C21 C22 -0.7(9) . . . . ?
 C20 C19 C24 C23 0.1(8) . . . . ?
 C20 C21 C22 C23 -0.3(9) . . . . ?
 C20 C21 C22 C25 176.8(5) . . . . ?
 C21 C22 C23 C24 1.1(8) . . . . ?
 C21 C22 C25 N3 15.1(8) . . . . ?
 C22 C23 C24 C19 -1.0(8) . . . . ?
 C23 C22 C25 N3 -167.7(5) . . . . ?
 C24 C19 C20 C21 0.7(9) . . . . ?
 C25 N3 C26 N4 179.5(4) . . . . ?
 C25 N3 C27 C28 -179.8(5) . . . . ?
 C25 C22 C23 C24 -176.2(5) . . . . ?
 C26 N3 C25 C22 -82.1(7) . . . . ?
 C26 N3 C27 C28 -0.1(6) . . . . ?
 C26 N4 C28 C27 -0.4(6) . . . . ?
 C27 N3 C25 C22 97.6(6) . . . . ?
 C27 N3 C26 N4 -0.2(6) . . . . ?
 C28 N4 C26 N3 0.3(6) . . . . ?
 C3 C2 C7 C6 -0.6(10) . . . . ?
 C3 C4 C5 C6 1.2(12) . . . . ?
 C3 C4 C5 Cl1 -177.8(5) . . . . ?
 C7 C2 C3 C4 0.3(9) . . . . ?
 C7 C6 C5 C4 -1.6(13) . . . . ?
 C7 C6 C5 Cl1 177.5(6) . . . . ?

_shelx_res_file
;
TITL lfx38_a.res in P-1
    lfx38.res
    created by SHELXL-2018/3 at 09:54:25 on 25-Aug-2021
REM Old TITL LFX38 in P1
REM SHELXT solution in P-1
REM R1 0.333, Rweak 0.094, Alpha 0.076, Orientation as input
REM Formula found by SHELXT: C28 N4 O6 Br
CELL 0.71073 10.0331 12.805 13.1684 63.495 80.368 67.362
ZERR 1 0.0008 0.0011 0.0014 0.01 0.008 0.008
LATT 1
SFAC C H Cl Co N O
UNIT 56 44 4 2 8 8
EQIV $1 1-X,1-Y,1-Z
EQIV $2 -X,1-Y,1-Z
EQIV $3 +X,-1+Y,1+Z

L.S. 60
PLAN  2
SIZE 0.2 0.15 0.1
TEMP 23
HTAB C15 O1_$1
HTAB C17 O2_$2
HTAB C18 O1_$1
HTAB C27 O4_$3
HTAB C23 O1_$3
HTAB C25 O4_$3
CONF
BOND $H
list 4
fmap 2
acta
MORE -1
OMIT -2 50.2
OMIT 8 -2 7
OMIT -1 5 8
REM <olex2.extras>
REM <HklSrc "%.\\LFX38.hkl">
REM </olex2.extras>

WGHT    0.043400    0.467000
FVAR       0.49877
CO1   4    0.410243    0.494225    0.325657    11.00000    0.04776    0.04111 =
         0.04384   -0.00996   -0.00260   -0.01525
CL2   3    1.305832    0.051137    0.486729    11.00000    0.06199    0.15994 =
         0.12111   -0.06131   -0.02664    0.01517
O1    6    0.358395    0.673354    0.286460    11.00000    0.04595    0.04343 =
         0.05843   -0.01311   -0.00831   -0.01099
O2    6    0.157456    0.654937    0.265091    11.00000    0.06168    0.05641 =
         0.06534   -0.02139   -0.00122   -0.02621
O3    6    0.610826    0.400530    0.379088    11.00000    0.04362    0.06798 =
         0.05727   -0.01496   -0.00382   -0.01458
O4    6    0.701668    0.503856    0.216162    11.00000    0.07088    0.05433 =
         0.05457   -0.01314   -0.00880   -0.01814
N1    5    0.320055    0.408495    0.472664    11.00000    0.04120    0.03882 =
         0.04526   -0.01292   -0.00102   -0.01210
N2    5    0.298956    0.308717    0.656274    11.00000    0.05752    0.03903 =
         0.03761   -0.00900    0.00108   -0.02123
N3    5    0.545666   -0.364968    0.921739    11.00000    0.06278    0.03425 =
         0.04953   -0.01048   -0.00767   -0.02086
N4    5    0.607284   -0.449590    0.799948    11.00000    0.05228    0.03729 =
         0.04164   -0.00532   -0.00506   -0.02034
C1    1    0.223859    0.720150    0.262546    11.00000    0.05007    0.03685 =
         0.04529   -0.01671    0.00042   -0.00983
C2    1    0.150491    0.856361    0.227736    11.00000    0.04752    0.05018 =
         0.04000   -0.01931   -0.00177   -0.00710
C8    1    0.714565    0.421121    0.313903    11.00000    0.05134    0.04698 =
         0.05090   -0.02127   -0.00632   -0.01704
C9    1    0.863089    0.332320    0.359590    11.00000    0.04941    0.05882 =
         0.04406   -0.02079   -0.00371   -0.01639
C10   1    0.985176    0.349821    0.300703    11.00000    0.05876    0.06757 =
         0.07383   -0.01803    0.00307   -0.02874
AFIX  43
H10   2    0.976615    0.419999    0.232699    11.00000   -1.20000
AFIX   0
C11   1    1.120906    0.263754    0.341836    11.00000    0.04397    0.10254 =
         0.10892   -0.05262    0.00932   -0.02718
AFIX  43
H11   2    1.203145    0.276602    0.302095    11.00000   -1.20000
AFIX   0
C12   1    1.133032    0.161948    0.439145    11.00000    0.05024    0.08606 =
         0.07209   -0.03818   -0.01517   -0.00283
C13   1    1.015852    0.140904    0.501838    11.00000    0.05977    0.11693 =
         0.06596   -0.00295   -0.00194   -0.01634
AFIX  43
H13   2    1.025890    0.070815    0.570144    11.00000   -1.20000
AFIX   0
C14   1    0.879977    0.228995    0.459245    11.00000    0.05325    0.09571 =
         0.06443   -0.00801    0.00181   -0.01183
AFIX  43
H14   2    0.798300    0.216617    0.500379    11.00000   -1.20000
AFIX   0
C15   1    0.386591    0.349381    0.572161    11.00000    0.04977    0.03888 =
         0.05061   -0.00909   -0.00929   -0.02092
AFIX  43
H15   2    0.481698    0.337739    0.582123    11.00000   -1.20000
AFIX   0
C16   1    0.183976    0.405907    0.496922    11.00000    0.04529    0.05236 =
         0.06374   -0.00726   -0.01046   -0.01044
AFIX  43
H16   2    0.111143    0.442396    0.443382    11.00000   -1.20000
AFIX   0
C17   1    0.169356    0.343579    0.608516    11.00000    0.05209    0.05703 =
         0.07077   -0.00821    0.00418   -0.02727
AFIX  43
H17   2    0.087524    0.327316    0.645933    11.00000   -1.20000
AFIX   0
C18   1    0.335749    0.242026    0.776040    11.00000    0.08715    0.04443 =
         0.04121   -0.01090   -0.00452   -0.02387
AFIX  23
H18A  2    0.256634    0.277249    0.818124    11.00000   -1.20000
H18B  2    0.420098    0.254831    0.787850    11.00000   -1.20000
AFIX   0
C19   1    0.366782    0.102629    0.823774    11.00000    0.05809    0.04070 =
         0.03359   -0.00965   -0.00249   -0.02162
C20   1    0.424599    0.034962    0.760922    11.00000    0.09509    0.04510 =
         0.03454   -0.00888    0.01573   -0.03364
AFIX  43
H20   2    0.442208    0.075007    0.684078    11.00000   -1.20000
AFIX   0
C21   1    0.457415   -0.093714    0.811128    11.00000    0.09354    0.04642 =
         0.03834   -0.01863    0.01297   -0.02497
AFIX  43
H21   2    0.495830   -0.138448    0.767080    11.00000   -1.20000
AFIX   0
C22   1    0.434059   -0.154934    0.923757    11.00000    0.05910    0.03937 =
         0.03591   -0.01128   -0.00256   -0.02111
C23   1    0.378011   -0.087070    0.986800    11.00000    0.07757    0.04724 =
         0.03277   -0.00751    0.00594   -0.03531
AFIX  43
H23   2    0.362984   -0.127666    1.064055    11.00000   -1.20000
AFIX   0
C24   1    0.343497    0.040145    0.937932    11.00000    0.06847    0.04107 =
         0.03932   -0.01809    0.00652   -0.02228
AFIX  43
H24   2    0.304086    0.084523    0.982213    11.00000   -1.20000
AFIX   0
C25   1    0.459360   -0.293092    0.984300    11.00000    0.09087    0.03524 =
         0.04519   -0.01249    0.00063   -0.02023
AFIX  23
H25A  2    0.506769   -0.326371    1.056293    11.00000   -1.20000
H25B  2    0.366467   -0.304018    1.000577    11.00000   -1.20000
AFIX   0
C26   1    0.499904   -0.378307    0.839773    11.00000    0.05121    0.03972 =
         0.06106   -0.01563   -0.01234   -0.01230
AFIX  43
H26   2    0.404902   -0.342116    0.814184    11.00000   -1.20000
AFIX   0
C27   1    0.691107   -0.432140    0.935216    11.00000    0.06607    0.05608 =
         0.07072   -0.02353   -0.01978   -0.01749
AFIX  43
H27   2    0.753046   -0.440697    0.985907    11.00000   -1.20000
AFIX   0
C28   1    0.725461   -0.482663    0.860701    11.00000    0.04649    0.05153 =
         0.06435   -0.01886   -0.00759   -0.01560
AFIX  43
H28   2    0.817710   -0.533601    0.851521    11.00000   -1.20000
AFIX   0
C3    1    0.213713    0.926529    0.243200    11.00000    0.06248    0.05158 =
         0.04541   -0.02226   -0.00685   -0.00970
AFIX  43
H3    2    0.302068    0.886895    0.280806    11.00000   -1.20000
AFIX   0
C4    1    0.149774    1.052911    0.204636    11.00000    0.08808    0.04664 =
         0.06934   -0.02439   -0.01888   -0.00172
AFIX  43
H4    2    0.193173    1.099173    0.216193    11.00000   -1.20000
AFIX   0
C7    1    0.019468    0.916054    0.171314    11.00000    0.05145    0.06521 =
         0.10453   -0.03411   -0.01987   -0.00441
AFIX  43
H7    2   -0.024360    0.870264    0.159442    11.00000   -1.20000
AFIX   0
C6    1   -0.046062    1.043339    0.132724    11.00000    0.07796    0.09100 =
         0.11920   -0.05636   -0.04815    0.01809
AFIX  43
H6    2   -0.135123    1.083542    0.096066    11.00000   -1.20000
AFIX   0
C5    1    0.019917    1.110159    0.148392    11.00000    0.10023    0.04756 =
         0.08680   -0.03112   -0.03370    0.01943
CL1   3   -0.061819    1.270053    0.094025    11.00000    0.23180    0.05878 =
         0.17414   -0.04808   -0.11918    0.03931
HKLF 4


REM  lfx38_a.res in P-1
REM wR2 = 0.1671, GooF = S = 1.047, Restrained GooF = 1.047 for all data
REM R1 = 0.0690 for 2701 Fo > 4sig(Fo) and 0.1366 for all 4961 data
REM 352 parameters refined using 0 restraints

END

WGHT      0.0434      0.4669

REM Highest difference peak  0.540,  deepest hole -0.589,  1-sigma level  0.072
Q1    1   0.0591  1.2787  0.0589  11.00000  0.05    0.54
Q2    1  -0.1001  1.2732  0.1054  11.00000  0.05    0.49
;
_shelx_res_checksum                61296
_shelx_hkl_file
;
 -13  -8  -5   10.79    8.16
 -13  -8  -4   -6.57    6.47
 -13  -7  -7    7.64    6.73
 -13  -7  -6   -2.72    4.30
 -13  -7  -5    7.40    6.67
 -13  -7  -4    7.91    7.46
 -13  -7  -3  -19.46   10.70
 -13  -7  -2   14.78    9.51
 -13  -7  -1    0.11    1.72
 -13  -6  -7   13.57    8.97
 -13  -6  -6    4.19    4.90
 -13  -6  -5    1.46    3.15
 -13  -6  -4   -4.47    5.09
 -13  -6  -3   -7.46    6.55
 -13  -6  -2    5.01    5.61
 -13  -6  -1   -1.24    3.06
 -13  -6   0    2.22    4.13
 -13  -5  -4    9.38    7.04
 -13  -5  -3   -2.62    3.96
 -13  -5  -2    4.11    4.90
 -13  -5  -1   -1.25    2.97
 -13  -5   0    1.01    3.19
 -13  -5   1   13.46    8.86
 -13  -4  -1   -0.28    2.24
 -13  -4   0    2.36    3.46
 -13  -4   1    2.40    3.88
 -13  -4   2  -11.29    8.01
 -12 -10  -7   12.25    8.86
 -12 -10  -6   12.01    8.71
 -12 -10  -5   24.59   12.37
 -12 -10  -4   -0.97    3.02
 -12 -10  -3    0.62    2.45
 -12 -10  -2   20.01   11.33
 -12  -9  -6   18.72   10.60
 -12  -9  -5    5.08    5.68
 -12  -9  -4    6.12    6.19
 -12  -9  -3   15.08    7.87
 -12  -9  -2    3.83    5.12
 -12  -9  -1    1.49    3.77
 -12  -8  -6   13.95   10.05
 -12  -8  -5   12.46    9.44
 -12  -8  -4   -1.32    3.22
 -12  -8  -3    3.04    4.43
 -12  -8  -2    6.77    6.37
 -12  -8  -1   -0.67    2.55
 -12  -8   0   14.24    9.35
 -12  -8   1   -3.18    4.91
 -12  -7  -6    3.18    4.44
 -12  -7  -5    9.29    7.24
 -12  -7  -4    0.48    2.49
 -12  -7  -3    7.35    6.44
 -12  -7  -2    0.44    2.44
 -12  -7  -1    4.61    5.48
 -12  -7   0    3.20    4.41
 -12  -7   1   10.87    8.11
 -12  -7   2   -1.30    3.39
 -12  -6  -6    8.98    6.97
 -12  -6  -5   -7.85    6.47
 -12  -6  -4    2.93    4.22
 -12  -6  -3    7.81    6.53
 -12  -6  -2   10.41    7.56
 -12  -6  -1  -16.63    9.42
 -12  -6   0   -0.90    2.91
 -12  -6   1   15.53    9.42
 -12  -6   2   -5.84    6.10
 -12  -6   3   10.58   11.72
 -12  -5  -8   29.12   12.91
 -12  -5  -7  -10.21    7.49
 -12  -5  -6   15.15    8.79
 -12  -5  -5   -9.38    6.98
 -12  -5  -4   -2.09    3.49
 -12  -5  -3   22.32   10.45
 -12  -5  -2   11.03    7.54
 -12  -5  -1    0.94    2.82
 -12  -5   0   -1.95    3.65
 -12  -5   1   -1.97    3.58
 -12  -5   2  -15.04    9.30
 -12  -5   3   16.73    9.89
 -12  -4  -8    6.94    6.69
 -12  -4  -7   -8.26    6.98
 -12  -4  -5    7.30    5.84
 -12  -4  -4   10.23    3.37
 -12  -4  -3   13.16    8.32
 -12  -4  -2  -13.54    8.03
 -12  -4  -1   -7.95    6.44
 -12  -4   0   -3.52    4.52
 -12  -4   1    1.58    3.26
 -12  -4   2    6.57    6.02
 -12  -4   3    1.86    3.58
 -12  -4   4   -2.54    4.35
 -12  -3  -8    3.24    5.10
 -12  -3  -7  -10.00    7.94
 -12  -3  -6  -10.25    7.73
 -12  -3  -2    8.60    6.25
 -12  -3  -1    7.36    5.82
 -12  -3   0   -5.92    5.41
 -12  -3   1   -2.75    3.76
 -12  -3   2  -18.23    9.54
 -12  -3   3   15.63    9.06
 -12  -3   4   -3.65    4.76
 -12  -3   5   -6.11    6.04
 -12  -2  -7   -8.49    7.82
 -12  -2  -6   -8.80    7.56
 -12  -2  -5   26.24   12.11
 -12  -2   3    0.48    2.14
 -12  -2   4    5.05    5.35
 -12  -2   5   -1.12    2.88
 -12  -1  -6   -2.16    4.27
 -12  -1  -5    8.55    7.39
 -12  -1  -4    9.55    7.47
 -12   0  -4  -13.23    9.12
 -11 -12  -6    5.66    6.17
 -11 -12  -5    2.84    4.63
 -11 -12  -4    4.46    5.45
 -11 -12  -3   27.32   13.03
 -11 -11  -6   11.94    8.51
 -11 -11  -5  -10.91    8.19
 -11 -11  -4   -5.81    6.02
 -11 -11  -3    6.85    6.64
 -11 -11  -2  -16.48   10.04
 -11 -11  -1   -1.94    4.17
 -11 -10  -6   -0.05    1.98
 -11 -10  -5   31.84   13.44
 -11 -10  -4   14.31    9.11
 -11 -10  -3    6.51    6.26
 -11 -10  -2    4.56    2.75
 -11 -10  -1    9.61    7.79
 -11 -10   0   -2.25    4.14
 -11 -10   1    3.64    5.02
 -11  -9  -5    0.31    2.26
 -11  -9  -4   10.40    7.68
 -11  -9  -3   13.66    8.69
 -11  -9  -2   16.84    9.64
 -11  -9  -1   10.12    7.67
 -11  -9   0    5.32    5.77
 -11  -9   1   21.35   10.58
 -11  -9   2  -11.80    8.71
 -11  -8  -5   40.60   14.83
 -11  -8  -4  -10.53    7.57
 -11  -8  -3   -0.05    2.07
 -11  -8  -2   14.66    6.64
 -11  -8  -1    5.52    5.00
 -11  -8   0   18.66   11.86
 -11  -8   1    2.54    4.42
 -11  -8   2   -8.34    7.24
 -11  -8   3   15.53    9.42
 -11  -7  -5   22.34   10.57
 -11  -7  -4    4.55    5.59
 -11  -7  -3    4.72    5.04
 -11  -7  -2   12.39    7.59
 -11  -7  -1    0.59    2.43
 -11  -7   0   -2.79    4.21
 -11  -7   1    8.25    6.88
 -11  -7   2   11.94    8.36
 -11  -7   3   26.18   12.34
 -11  -7   4   13.06    9.13
 -11  -6  -5    5.00    5.07
 -11  -6  -4   -2.34    3.73
 -11  -6  -3   28.05   11.47
 -11  -6  -2    6.48    5.62
 -11  -6  -1   25.31   10.81
 -11  -6   0   -0.85    2.80
 -11  -6   1    6.37    5.71
 -11  -6   2    2.91    4.37
 -11  -6   3    5.10    5.68
 -11  -6   4    4.82    5.54
 -11  -5  -9   19.77   11.93
 -11  -5  -8   14.61    8.94
 -11  -5  -7    0.94    2.89
 -11  -5  -6    7.33    5.95
 -11  -5  -5    6.13    3.40
 -11  -5  -5    9.91    7.17
 -11  -5  -4   -3.42    4.28
 -11  -5  -3   35.04   12.89
 -11  -5  -2    4.94    5.00
 -11  -5  -1   -0.69    2.50
 -11  -5   0   28.01   11.85
 -11  -5   1    7.09    6.15
 -11  -5   2    1.53    3.02
 -11  -5   3    3.40    4.57
 -11  -5   4   -9.96    7.53
 -11  -5   5    7.19    6.79
 -11  -4 -10    3.54    5.44
 -11  -4  -9   13.58   11.62
 -11  -4  -8   11.63    8.23
 -11  -4  -7   11.70    8.91
 -11  -4  -6   34.15   12.71
 -11  -4  -5   -2.01    3.48
 -11  -4  -5   18.99    9.06
 -11  -4  -4    0.65    2.63
 -11  -4  -4   -4.20    4.48
 -11  -4  -3   27.79   11.50
 -11  -4  -2    4.77    4.76
 -11  -4  -1   11.92    7.35
 -11  -4   0   34.13   12.38
 -11  -4   1   31.20   12.94
 -11  -4   2   11.46    7.54
 -11  -4   3   25.16   11.93
 -11  -4   4   12.97    8.44
 -11  -4   5    5.07    5.64
 -11  -4   6    8.15    7.70
 -11  -3  -9    4.62    6.02
 -11  -3  -8   21.41   11.49
 -11  -3  -7    5.08    5.71
 -11  -3  -6   -6.93    6.22
 -11  -3  -5   -9.96    7.02
 -11  -3  -5    4.20    4.37
 -11  -3  -4   20.07    9.28
 -11  -3  -4    7.39    5.60
 -11  -3  -3   90.34   18.49
 -11  -3  -3   72.19   16.93
 -11  -3  -2   18.19    7.80
 -11  -3  -1   -5.33    4.75
 -11  -3   0   14.41    7.91
 -11  -3   1   12.31    7.44
 -11  -3   2   -5.00    5.08
 -11  -3   3   33.74   12.69
 -11  -3   4    5.04    5.37
 -11  -3   5    0.40    2.61
 -11  -3   6   11.01    8.13
 -11  -2  -8   -9.02    8.03
 -11  -2  -7    5.61    6.20
 -11  -2  -6   12.60    8.70
 -11  -2  -5   17.05   10.48
 -11  -2  -4   -9.54    6.92
 -11  -2  -3  -11.87    7.29
 -11  -2  -2    5.35    3.30
 -11  -2  -1   12.18    6.91
 -11  -2   0   23.95   10.08
 -11  -2   1   16.21    8.59
 -11  -2   2    0.21    1.67
 -11  -2   3   14.13    8.04
 -11  -2   4    1.33    2.92
 -11  -2   5   10.17    7.38
 -11  -2   6    2.49    4.04
 -11  -2   7    6.57    6.19
 -11  -1  -7    2.32    4.65
 -11  -1  -6  -16.66   10.14
 -11  -1  -5    1.75    3.85
 -11  -1  -4   14.10    8.61
 -11  -1   2   10.26    6.47
 -11  -1   3    1.55    2.91
 -11  -1   4   -7.41    5.94
 -11  -1   5   -0.11    1.90
 -11  -1   6   -4.79    5.17
 -11  -1   7    1.75    3.38
 -11   0  -6   -5.77    6.41
 -11   0  -5  -17.75   10.42
 -11   0   7    0.19    1.84
 -11   0   8    7.34    6.64
 -10 -14  -7    4.42    5.68
 -10 -14  -6    0.03    3.19
 -10 -14  -5   13.71    9.45
 -10 -14  -4  -13.05    9.12
 -10 -13  -6   16.25    9.93
 -10 -13  -5   -0.48    2.53
 -10 -13  -4    6.27    6.37
 -10 -13  -3   19.91   11.66
 -10 -13  -2    5.70    6.22
 -10 -12  -6   14.17    8.35
 -10 -12  -5   -2.85    4.53
 -10 -12  -4    4.91    3.58
 -10 -12  -3   12.42    8.54
 -10 -12  -2    3.69    4.80
 -10 -12  -1   -0.11    2.30
 -10 -12   0   23.86   12.66
 -10 -11  -5    0.70    2.95
 -10 -11  -4   18.53    9.66
 -10 -11  -3   34.50   13.70
 -10 -11  -2    0.02    2.93
 -10 -11  -1   13.98    9.72
 -10 -11   0   15.00    9.54
 -10 -11   1    2.73    4.70
 -10 -10  -5    7.56    6.50
 -10 -10  -4   22.60    9.85
 -10 -10  -3   74.48   19.74
 -10 -10  -2    1.75    3.91
 -10 -10  -1   30.60   13.23
 -10 -10   0   23.59   11.50
 -10 -10   1    2.54    4.41
 -10 -10   2  -20.08   11.14
 -10 -10   3    2.42    4.53
 -10  -9  -4    2.60    4.02
 -10  -9  -3   14.76    8.66
 -10  -9  -2    7.97    5.34
 -10  -9  -1   24.22   11.24
 -10  -9   0    0.44    2.42
 -10  -9   1   -1.54    3.62
 -10  -9   2   39.25   15.14
 -10  -9   3   11.53   10.51
 -10  -9   4   16.53   10.31
 -10  -8  -4   -6.11    5.63
 -10  -8  -3   17.08    7.63
 -10  -8  -2   -3.96    4.61
 -10  -8  -1   -0.53    2.52
 -10  -8   0  -11.94    7.89
 -10  -8   1    5.94    5.89
 -10  -8   2    9.84    6.31
 -10  -8   3   18.81    9.99
 -10  -8   4    5.63    5.77
 -10  -7  -4    9.64    6.69
 -10  -7  -3   -4.49    4.73
 -10  -7  -2   13.62    7.87
 -10  -7  -1   -0.69    1.70
 -10  -7   0    0.15    2.12
 -10  -7   1    7.57    6.30
 -10  -7   2   20.15   10.24
 -10  -7   3   18.42   10.02
 -10  -7   4    0.87    2.74
 -10  -7   5   12.34    8.78
 -10  -6  -4    8.50    6.12
 -10  -6  -3   18.02    8.08
 -10  -6  -2   15.86    8.55
 -10  -6  -1   -3.50    4.13
 -10  -6   0   -4.43    4.75
 -10  -6   1   15.94    9.97
 -10  -6   2   18.14   10.48
 -10  -6   3   33.44   13.05
 -10  -6   4   -6.78    6.23
 -10  -6   5   14.53    9.23
 -10  -6   6   -0.64    3.14
 -10  -5  -9   33.54   13.42
 -10  -5  -8   40.61   14.87
 -10  -5  -7   24.69   10.34
 -10  -5  -6    2.96    3.95
 -10  -5  -5   -1.42    1.89
 -10  -5  -4   25.73   10.68
 -10  -5  -4   15.65    5.14
 -10  -5  -3  182.49   22.62
 -10  -5  -3  147.39   24.43
 -10  -5  -2   -0.27    3.66
 -10  -5  -1   20.44    9.13
 -10  -5   0   16.41    8.54
 -10  -5   1    6.31    6.82
 -10  -5   2   -5.56    5.31
 -10  -5   3    3.02    3.79
 -10  -5   4    3.88    4.71
 -10  -5   5    8.15    7.93
 -10  -5   6    6.82    5.31
 -10  -5   7    5.74    6.45
 -10  -4 -11   11.58    9.01
 -10  -4 -10    7.14    7.10
 -10  -4  -9   31.34   13.33
 -10  -4  -8    3.76    4.96
 -10  -4  -7    3.29    4.47
 -10  -4  -6    6.03    5.53
 -10  -4  -5    8.62    7.12
 -10  -4  -4   69.96   15.07
 -10  -4  -4   97.80   19.98
 -10  -4  -3   49.17   14.79
 -10  -4  -3   45.95   12.26
 -10  -4  -2    1.96    2.42
 -10  -4  -2    9.25    4.81
 -10  -4  -1    7.40    3.51
 -10  -4   0   37.78   12.23
 -10  -4   1    7.45    4.87
 -10  -4   2   49.31   14.61
 -10  -4   3   13.05    8.92
 -10  -4   4   26.31   11.29
 -10  -4   5    8.04    6.74
 -10  -4   6   -2.20    4.00
 -10  -4   7   -9.54    7.81
 -10  -3 -10   11.97    9.06
 -10  -3  -9   19.64   11.07
 -10  -3  -8    7.09    6.54
 -10  -3  -7    0.67    4.94
 -10  -3  -6    9.88    7.15
 -10  -3  -5    1.04    4.02
 -10  -3  -4   11.76    6.89
 -10  -3  -4   10.94    7.43
 -10  -3  -3   71.88   16.55
 -10  -3  -3   88.51   17.57
 -10  -3  -2   -5.14    4.55
 -10  -3  -2   -0.87    4.52
 -10  -3  -1    7.04    5.31
 -10  -3   0   17.74    8.25
 -10  -3   1    7.56    5.70
 -10  -3   2    0.31    3.19
 -10  -3   3    7.41    6.23
 -10  -3   4    7.78    6.23
 -10  -3   5   21.78   10.41
 -10  -3   6  -12.52    8.29
 -10  -3   7   -3.86    5.25
 -10  -3   8   -0.40    2.85
 -10  -2  -9  -18.70   11.18
 -10  -2  -8  -14.76    9.45
 -10  -2  -7   40.52   15.20
 -10  -2  -6   13.84    9.38
 -10  -2  -5   -0.12    2.65
 -10  -2  -4   -2.13    3.08
 -10  -2  -4    0.46    2.51
 -10  -2  -3    5.85    6.74
 -10  -2  -3   -0.23    2.10
 -10  -2  -2   11.74    6.59
 -10  -2  -1   -3.78    3.86
 -10  -2   0   40.95   12.12
 -10  -2   1    3.92    3.55
 -10  -2   2   35.77   12.34
 -10  -2   3   13.35    8.46
 -10  -2   4    6.29    5.53
 -10  -2   5    8.33    5.48
 -10  -2   6    9.19    7.06
 -10  -2   7    1.69    3.45
 -10  -2   8   16.04    7.66
 -10  -1  -9   41.66   16.68
 -10  -1  -8   -0.38    3.15
 -10  -1  -7    2.30    4.28
 -10  -1  -6   -8.40    7.03
 -10  -1  -5   -1.95    3.78
 -10  -1  -3   -0.72    1.79
 -10  -1  -2   -0.31    1.23
 -10  -1  -1   -1.46    2.46
 -10  -1   0   25.44    9.59
 -10  -1   1   -6.06    4.77
 -10  -1   2   44.70   13.22
 -10  -1   3   53.82   14.38
 -10  -1   4   -7.13    5.58
 -10  -1   5    1.47    3.26
 -10  -1   6   20.54   10.00
 -10  -1   7  -11.88    7.87
 -10  -1   8   23.45   11.47
 -10  -1   9   11.37    9.61
 -10   0  -8    0.88    3.70
 -10   0  -7   17.14   10.76
 -10   0  -6   27.31   14.09
 -10   0   1  -10.22    5.76
 -10   0   2   19.17    8.43
 -10   0   3   -1.21    2.59
 -10   0   4    1.95    3.16
 -10   0   5   21.17    9.47
 -10   0   6   22.55   10.88
 -10   0   7   12.23    7.85
 -10   0   8    2.07    6.19
 -10   0   9    7.58    6.77
 -10   1  -7    2.55    4.97
 -10   1  -6  -16.99   10.46
 -10   1   6   -0.80    2.59
 -10   1   7   10.48    7.05
 -10   1   8   19.41    9.90
 -10   1   9   -2.52    4.24
  -9 -15  -7   -9.67    7.89
  -9 -15  -6   19.82   11.04
  -9 -15  -5    0.27    2.38
  -9 -15  -4    5.65    6.03
  -9 -15  -3    8.41    7.43
  -9 -14  -6    8.55    6.09
  -9 -14  -5   -2.02    3.89
  -9 -14  -4   -6.81    6.55
  -9 -14  -3    2.19    6.43
  -9 -14  -2  -12.23    8.69
  -9 -14  -1   15.46   10.16
  -9 -13  -6    4.45    2.47
  -9 -13  -5   14.63    9.35
  -9 -13  -4    6.72    5.38
  -9 -13  -3    0.85    1.86
  -9 -13  -2   -4.37    5.34
  -9 -13  -1   14.54    9.27
  -9 -13   0   53.26   17.01
  -9 -13   1  -12.67    9.10
  -9 -12  -5    4.95    5.46
  -9 -12  -4   10.06    7.46
  -9 -12  -3   30.52   11.04
  -9 -12  -2    3.58    5.36
  -9 -12  -1   10.34    7.83
  -9 -12   0   29.40   12.87
  -9 -12   1    4.24    5.39
  -9 -12   2   -8.49    7.52
  -9 -11  -5   -8.72    6.80
  -9 -11  -4   31.24   11.63
  -9 -11  -3   17.75    8.47
  -9 -11  -2    1.98    3.73
  -9 -11  -1    0.32    5.97
  -9 -11   0   -5.89    6.04
  -9 -11   1    9.91    7.72
  -9 -11   2   -3.84    5.16
  -9 -11   3    3.93    8.53
  -9 -10  -4   38.72   13.75
  -9 -10  -3   18.63    8.98
  -9 -10  -2   -8.59    6.66
  -9 -10  -1   -1.91    6.66
  -9 -10   0   -7.78    6.64
  -9 -10   1    7.05    5.62
  -9 -10   2    2.65    4.35
  -9 -10   3   12.04    9.22
  -9 -10   4    0.03    3.48
  -9  -9  -4   84.90   19.16
  -9  -9  -3   -1.98    3.88
  -9  -9  -2   -8.18    6.33
  -9  -9  -1   27.22   11.34
  -9  -9   0    2.86    2.56
  -9  -9   1   -5.58    5.75
  -9  -9   2  126.66   25.52
  -9  -9   3  -23.34   11.38
  -9  -9   4    3.07    4.37
  -9  -9   5  -12.86    9.04
  -9  -8  -3   62.85   16.31
  -9  -8  -2   18.77    8.88
  -9  -8  -1   56.85   15.18
  -9  -8   0   18.93    8.81
  -9  -8   1   33.00   12.50
  -9  -8   2   72.90   18.20
  -9  -8   3    4.56    4.99
  -9  -8   4   -9.34    7.40
  -9  -8   5   12.34    9.48
  -9  -8   6    4.63    5.82
  -9  -7  -3   21.83    8.47
  -9  -7  -2   20.31    8.23
  -9  -7  -1   51.66   14.81
  -9  -7   0   63.20   16.69
  -9  -7   1    2.73    2.11
  -9  -7   2  101.36   21.90
  -9  -7   3   21.09    8.54
  -9  -7   4   20.61   10.39
  -9  -7   5    9.87    6.49
  -9  -7   6   -0.03    8.04
  -9  -6  -3    3.88    4.19
  -9  -6  -2    4.33    3.83
  -9  -6  -1   15.17    7.78
  -9  -6   0   28.44   10.67
  -9  -6   1   -7.90    6.03
  -9  -6   2   49.46   15.76
  -9  -6   3    0.92    2.61
  -9  -6   4   31.06   12.74
  -9  -6   5   32.03   12.56
  -9  -6   6    5.20    5.77
  -9  -6   7   -6.19    6.34
  -9  -5  -8   16.91    9.31
  -9  -5  -7   77.87   18.37
  -9  -5  -6   20.09    8.86
  -9  -5  -5   29.44    8.79
  -9  -5  -4   10.26    6.87
  -9  -5  -3    9.45    4.62
  -9  -5  -3   15.31    7.48
  -9  -5  -2  133.62   22.32
  -9  -5  -1   -1.25    4.45
  -9  -5   0    9.70    6.09
  -9  -5   1   14.34    9.77
  -9  -5   2   -3.85    4.43
  -9  -5   3    7.39    5.33
  -9  -5   4   11.00    7.32
  -9  -5   5   55.91   16.94
  -9  -5   6   -7.82    6.67
  -9  -5   7   12.94    8.70
  -9  -5   8    0.72    2.79
  -9  -4 -11    4.35    8.82
  -9  -4 -10   11.54    8.17
  -9  -4  -9   14.83   10.35
  -9  -4  -8    9.32    7.02
  -9  -4  -7   39.88   13.20
  -9  -4  -6   14.01    7.42
  -9  -4  -5   10.27    5.96
  -9  -4  -4   79.64   15.20
  -9  -4  -3   14.60    7.29
  -9  -4  -3   -1.42    2.64
  -9  -4  -2    1.33    2.84
  -9  -4  -2   -3.01    3.54
  -9  -4  -1   -2.60    2.65
  -9  -4  -1    2.21    3.14
  -9  -4   0   19.20    8.43
  -9  -4   1   29.48   10.29
  -9  -4   2    9.05    6.16
  -9  -4   3    1.51    2.56
  -9  -4   4   19.10   10.38
  -9  -4   5   -3.26    4.35
  -9  -4   6   -2.08    5.88
  -9  -4   7   -3.54    4.73
  -9  -4   8   16.50    9.95
  -9  -3 -11    9.40    8.16
  -9  -3 -10    4.55    6.20
  -9  -3  -9   20.66   10.81
  -9  -3  -8  -11.47    7.90
  -9  -3  -7   39.06   13.62
  -9  -3  -6   45.11   14.03
  -9  -3  -5    6.96    2.83
  -9  -3  -4   13.70    6.44
  -9  -3  -3   14.01    6.15
  -9  -3  -3   20.52    9.05
  -9  -3  -2    1.95    4.08
  -9  -3  -2   11.10    5.63
  -9  -3  -1    5.57    1.81
  -9  -3  -1    6.27    4.24
  -9  -3   0   26.08    7.84
  -9  -3   0   44.39   12.35
  -9  -3   1    7.94    5.40
  -9  -3   2   31.37   10.62
  -9  -3   3    7.53    5.96
  -9  -3   4   59.51   15.91
  -9  -3   5   11.38    7.12
  -9  -3   6   -3.56    4.51
  -9  -3   7   11.92    8.52
  -9  -3   8   -2.24    4.18
  -9  -3   9   15.07   12.21
  -9  -2 -11    2.32    4.86
  -9  -2 -10   20.11   11.41
  -9  -2  -9   -2.49    4.71
  -9  -2  -8   -3.80    6.91
  -9  -2  -7   22.65   10.07
  -9  -2  -6   46.97   13.66
  -9  -2  -5    5.33    5.21
  -9  -2  -4   59.68   14.79
  -9  -2  -3    5.34    4.53
  -9  -2  -3   -0.11    1.45
  -9  -2  -2    2.33    1.49
  -9  -2  -1   78.93   15.68
  -9  -2   0  115.16   19.00
  -9  -2   1    2.23    3.08
  -9  -2   2  125.42   20.94
  -9  -2   3   25.78    9.80
  -9  -2   4   39.16   12.38
  -9  -2   5   19.37    8.04
  -9  -2   6  -11.63    7.53
  -9  -2   7   20.48   10.17
  -9  -2   8    0.07    4.96
  -9  -2   9  -23.31   11.68
  -9  -1 -10   11.10    9.10
  -9  -1  -9    1.90    4.23
  -9  -1  -8    6.11    6.62
  -9  -1  -7   41.59   14.44
  -9  -1  -6   14.90    8.23
  -9  -1  -5  -12.83    7.80
  -9  -1  -3   -9.71    5.35
  -9  -1  -2    4.79    3.80
  -9  -1  -1   74.07   15.22
  -9  -1   0  103.08   17.49
  -9  -1   1   -5.19    4.21
  -9  -1   2   90.08   16.99
  -9  -1   3   13.33    6.91
  -9  -1   3   16.77    6.39
  -9  -1   4   30.91   11.02
  -9  -1   5    1.36    3.20
  -9  -1   6    0.98    2.88
  -9  -1   7    3.77    4.15
  -9  -1   8    5.16    5.40
  -9  -1   9    8.04    7.75
  -9  -1  10    4.96    9.66
  -9   0  -9   -1.53    4.01
  -9   0  -8  -10.71    8.37
  -9   0  -7   35.17   14.77
  -9   0  -6   21.30   11.55
  -9   0  -3    4.07    3.36
  -9   0  -2    4.66    3.59
  -9   0  -1    8.79    4.82
  -9   0   0   21.13    7.57
  -9   0   1   -2.68    2.97
  -9   0   2   47.17   10.43
  -9   0   2   44.44   11.49
  -9   0   3    6.92    4.40
  -9   0   3    9.08    5.52
  -9   0   4    0.94    2.14
  -9   0   4   -1.00    3.69
  -9   0   5    4.11    3.65
  -9   0   6   -3.03    3.61
  -9   0   7   57.64   17.28
  -9   0   8   -1.51    6.07
  -9   0   9    2.63    4.17
  -9   0  10   15.36    9.58
  -9   1  -8  -21.68   12.00
  -9   1  -7   -1.25    3.76
  -9   1   1   15.85    6.54
  -9   1   1    6.86    4.34
  -9   1   2   19.01    7.29
  -9   1   2   26.41    8.53
  -9   1   3   -2.66    3.15
  -9   1   3    5.04    3.98
  -9   1   4   -0.32    1.71
  -9   1   4   -0.47    1.59
  -9   1   5   13.30    7.22
  -9   1   5   11.39    6.36
  -9   1   6   -2.97    3.69
  -9   1   7    3.95    4.41
  -9   1   8    8.10    6.35
  -9   1   9   13.69    8.51
  -9   1  10   -5.71    6.16
  -9   2   1   30.12    8.87
  -9   2   2   -6.60    4.69
  -9   2   3    3.79    3.59
  -9   2   4   13.87    6.62
  -9   2   5   17.05    7.55
  -9   2   5    7.93    5.66
  -9   2   6   -1.95    3.15
  -9   2   6    2.79    3.61
  -9   2   7   16.92    8.76
  -9   2   7   15.50    8.67
  -9   2   8   14.65    8.18
  -9   2   9   -7.95    6.49
  -9   2  10   14.41    9.02
  -9   2  11    0.36    2.32
  -9   3   1   73.43   16.46
  -9   3   2   49.86   13.84
  -9   3   3    5.80    3.90
  -9   3   4   30.10   10.47
  -9   3   5   23.43    9.60
  -9   3   6   -2.88    3.80
  -9   3   7   21.54    9.94
  -9   3   8    7.64    6.26
  -9   3   9   -4.84    5.28
  -9   4   1   -4.29    4.37
  -9   4   2    8.58    6.00
  -9   4   3   -4.02    4.30
  -9   4   4    9.16    6.21
  -9   4   5   32.74   11.59
  -9   4   6   -6.30    5.46
  -9   4   7   -0.68    2.40
  -9   4   8   -2.52    3.87
  -9   4   9   -6.51    6.16
  -9   4  10   15.00    9.41
  -9   5   1   55.97   16.15
  -9   5   2   30.85   11.85
  -9   5   3    2.74    3.88
  -9   5   4   -1.31    3.22
  -9   5   5   -7.46    6.06
  -9   5   6   16.26    7.55
  -9   5   7    6.46    5.88
  -9   5   8   -3.32    4.51
  -9   5   9   -6.15    5.95
  -9   6   2    8.08    6.55
  -9   6   3    8.74    6.89
  -9   6   4   15.55    8.94
  -9   6   5   19.43    9.79
  -9   6   6   -0.73    2.67
  -9   6   7    9.02    7.04
  -9   6   8    6.52    6.20
  -9   7   2   15.30    9.21
  -9   7   3    9.20    7.31
  -9   7   4    8.04    6.89
  -9   7   5   -9.10    7.44
  -9   7   6    0.95    3.09
  -9   7   7   18.01   10.19
  -8 -16  -8   18.87   11.38
  -8 -16  -7   -1.16    3.68
  -8 -16  -6  -11.98    8.52
  -8 -16  -5  -16.92   10.02
  -8 -16  -4   -2.05    3.84
  -8 -16  -3   -3.89    5.18
  -8 -15  -7   -0.50    2.66
  -8 -15  -6    1.00    3.15
  -8 -15  -5    5.71    2.82
  -8 -15  -4   -9.74    7.45
  -8 -15  -3   -6.69    6.46
  -8 -15  -2    6.30    6.29
  -8 -15  -1   13.23    9.00
  -8 -14  -6    6.70    6.27
  -8 -14  -5    3.52    4.75
  -8 -14  -4   15.38    7.44
  -8 -14  -3   14.12    8.82
  -8 -14  -2   12.02    8.27
  -8 -14  -1    1.42    3.37
  -8 -14   0    6.75    6.44
  -8 -14   1    3.02    4.77
  -8 -13  -5   -2.89    4.44
  -8 -13  -4   24.12   11.30
  -8 -13  -3    7.85    6.55
  -8 -13  -2  -13.77    8.56
  -8 -13  -1   21.85   10.88
  -8 -13   0   20.90   10.76
  -8 -13   1    6.15    4.67
  -8 -13   2   -0.03    2.23
  -8 -12  -5    7.49    6.27
  -8 -12  -4   31.46   13.46
  -8 -12  -3   58.68   17.12
  -8 -12  -2    7.08    4.44
  -8 -12  -1   -0.16    2.31
  -8 -12   0   -8.79    7.02
  -8 -12   1    2.94    6.93
  -8 -12   2   -0.94    3.20
  -8 -12   3    8.47    7.27
  -8 -11  -4   41.02   13.76
  -8 -11  -3   15.25    8.41
  -8 -11  -2    2.71    3.80
  -8 -11  -1    7.18    5.44
  -8 -11   0   -3.85    5.40
  -8 -11   1    7.62    6.50
  -8 -11   2    5.65    5.78
  -8 -11   3    0.79    2.96
  -8 -11   4   25.57   12.38
  -8 -10  -4   90.91   19.96
  -8 -10  -3    4.33    6.68
  -8 -10  -2   -0.02    3.72
  -8 -10  -1    7.14    7.44
  -8 -10   0    0.55    6.23
  -8 -10   1   31.81   12.85
  -8 -10   2   35.86   13.07
  -8 -10   3    4.55    7.48
  -8 -10   4   18.81   10.34
  -8 -10   5  -10.38    8.04
  -8  -9  -3   25.01    9.38
  -8  -9  -2   51.20   14.22
  -8  -9  -1   24.82   10.55
  -8  -9   0   18.97    9.42
  -8  -9   1    3.97    2.56
  -8  -9   2   18.75    8.97
  -8  -9   3   12.28    8.05
  -8  -9   4   17.79    9.59
  -8  -9   5   12.64    8.66
  -8  -9   6    0.03    5.18
  -8  -8  -3    3.64    3.24
  -8  -8  -2  103.32   20.03
  -8  -8  -1  120.44   21.91
  -8  -8   0    8.19    2.95
  -8  -8   1   18.91    8.42
  -8  -8   2   37.54   12.87
  -8  -8   3    0.65    2.77
  -8  -8   4   -4.37    5.23
  -8  -8   5   28.40   13.12
  -8  -8   6    6.01    6.18
  -8  -8   7  -18.38   10.73
  -8  -7  -3   13.32    6.85
  -8  -7  -2   39.26   12.93
  -8  -7  -1   55.53   14.12
  -8  -7   0   37.70   11.64
  -8  -7   1   24.54    9.85
  -8  -7   2   14.31    7.84
  -8  -7   3    9.07    7.42
  -8  -7   4   51.93   15.46
  -8  -7   5   29.46   12.91
  -8  -7   6   11.78    8.14
  -8  -7   7    5.29    5.74
  -8  -6  -2   63.06   14.48
  -8  -6  -1   89.79   18.07
  -8  -6   0   15.03    7.84
  -8  -6   1   28.80   10.67
  -8  -6   2   15.74    8.09
  -8  -6   3    7.17    8.57
  -8  -6   4   82.49   19.08
  -8  -6   5   34.19   12.39
  -8  -6   6    9.65    5.76
  -8  -6   7    1.06    4.50
  -8  -6   8   16.84   10.57
  -8  -5  -7  163.70   24.77
  -8  -5  -6   20.48    8.23
  -8  -5  -5   49.39   11.94
  -8  -5  -4   -5.07    5.96
  -8  -5  -2    4.23    4.36
  -8  -5  -1    6.09    4.84
  -8  -5   0   35.06   10.85
  -8  -5   1   79.70   17.18
  -8  -5   2   56.04   15.00
  -8  -5   3    8.30    5.98
  -8  -5   4  110.29   22.02
  -8  -5   5   86.12   19.89
  -8  -5   6    0.94    4.54
  -8  -5   7   41.75   15.40
  -8  -5   8    2.41    6.34
  -8  -5   9   14.28   10.31
  -8  -4 -11   11.02    8.24
  -8  -4 -10   20.59   11.05
  -8  -4  -9    2.85    3.93
  -8  -4  -8   11.31    6.47
  -8  -4  -7  108.04   20.28
  -8  -4  -6    7.15    2.79
  -8  -4  -5   25.08    7.98
  -8  -4  -4  304.40   28.99
  -8  -4  -3   35.56    8.62
  -8  -4  -2  180.69   23.85
  -8  -4  -2  173.23   19.43
  -8  -4  -1   22.45    8.59
  -8  -4  -1   22.01    6.18
  -8  -4   0   43.09    7.22
  -8  -4   0   54.56   13.39
  -8  -4   1   72.55   15.92
  -8  -4   2   11.30    6.04
  -8  -4   3    5.97    4.99
  -8  -4   4   94.78   19.67
  -8  -4   5   88.65   19.81
  -8  -4   6    1.32    3.22
  -8  -4   7    2.43    3.08
  -8  -4   8    4.58    5.54
  -8  -4   9   14.51    9.38
  -8  -3 -12   23.52   12.51
  -8  -3 -11    6.65   10.02
  -8  -3 -10   11.74    9.54
  -8  -3  -9    4.56    5.39
  -8  -3  -8   82.79   19.99
  -8  -3  -7  188.26   28.17
  -8  -3  -6   42.70   12.60
  -8  -3  -5   41.30   11.46
  -8  -3  -4   -3.39    3.81
  -8  -3  -3  141.42   18.93
  -8  -3  -2  177.51   22.96
  -8  -3  -2  162.81   19.76
  -8  -3  -1  232.91   21.35
  -8  -3  -1  204.80   24.66
  -8  -3  -1  159.61    9.15
  -8  -3   0    2.81    2.07
  -8  -3   0    8.90    2.96
  -8  -3   0    8.58    3.80
  -8  -3   1   90.33   10.79
  -8  -3   1  128.80   20.61
  -8  -3   2   35.66   10.73
  -8  -3   3   32.88   11.07
  -8  -3   4   44.98   12.93
  -8  -3   5    7.06    3.33
  -8  -3   6   -0.56    4.16
  -8  -3   7   16.59    8.97
  -8  -3   8    5.73    7.37
  -8  -3   9    5.74    5.52
  -8  -3  10   24.73   13.43
  -8  -2 -12   17.78   11.27
  -8  -2 -11    6.93    7.05
  -8  -2 -10   12.77    8.82
  -8  -2  -9   15.57    7.73
  -8  -2  -8   -6.24    5.93
  -8  -2  -7   14.70    6.47
  -8  -2  -6    1.48    2.83
  -8  -2  -5   67.64   15.65
  -8  -2  -4  213.33   26.58
  -8  -2  -3    1.13    1.21
  -8  -2  -2   11.38    5.82
  -8  -2  -2   15.30    3.55
  -8  -2  -1   12.89    5.92
  -8  -2  -1   13.64    3.49
  -8  -2   0   49.25   11.77
  -8  -2   0   57.63    7.94
  -8  -2   1  204.81   24.76
  -8  -2   1  175.94   15.86
  -8  -2   2   51.60   12.95
  -8  -2   3   -1.37    3.55
  -8  -2   4   17.85    8.14
  -8  -2   5   11.33    6.08
  -8  -2   6    5.60    6.38
  -8  -2   7   41.10   13.69
  -8  -2   8   -3.31    4.52
  -8  -2   9   -3.81    3.72
  -8  -2  10   18.22   10.20
  -8  -1 -11   11.87    9.24
  -8  -1 -10   -2.74    4.79
  -8  -1  -9  -15.61    9.61
  -8  -1  -8   41.35   15.78
  -8  -1  -7  -10.15    7.21
  -8  -1  -6   36.55   12.02
  -8  -1  -5   -1.41    2.14
  -8  -1  -5  -14.39    7.77
  -8  -1  -4   39.21    7.89
  -8  -1  -3   -3.18    3.05
  -8  -1  -2    2.17    1.95
  -8  -1  -2    0.17    2.27
  -8  -1  -1   21.12    7.18
  -8  -1  -1   23.04    5.82
  -8  -1   0   -6.94    3.32
  -8  -1   0    0.01    2.92
  -8  -1   1    0.74    2.81
  -8  -1   1    6.17    3.33
  -8  -1   2    1.34    1.95
  -8  -1   2    3.61    1.65
  -8  -1   3   15.76    7.11
  -8  -1   4   36.18   10.81
  -8  -1   5   -0.43    2.51
  -8  -1   6   10.24    6.03
  -8  -1   7   18.58    8.54
  -8  -1   8    0.12    2.25
  -8  -1   9    2.84    4.38
  -8  -1  10   20.30   11.50
  -8  -1  11   -0.68    3.06
  -8   0 -10   23.86   14.06
  -8   0  -9    0.21    2.72
  -8   0  -8   13.23    8.86
  -8   0  -7   -9.69    7.41
  -8   0  -5  133.30   17.85
  -8   0  -4   28.36    8.02
  -8   0  -3   11.85    5.65
  -8   0  -3   11.29    4.46
  -8   0  -2   35.13    9.73
  -8   0  -2   35.42    8.12
  -8   0  -1   11.40    5.14
  -8   0  -1   20.66    6.10
  -8   0   0    0.01    3.16
  -8   0   0    2.55    1.72
  -8   0   1   42.45    8.84
  -8   0   1   38.36   10.01
  -8   0   2   12.12    6.05
  -8   0   2    8.14    3.64
  -8   0   3    6.45    4.34
  -8   0   3   -4.66    3.56
  -8   0   4   -5.51    5.03
  -8   0   5   -2.25    3.62
  -8   0   6    4.41    4.44
  -8   0   7  108.51   21.32
  -8   0   8    8.65    6.56
  -8   0   9    1.87    3.53
  -8   0  10   24.96   12.93
  -8   0  11    7.51    7.03
  -8   1  -9    8.09    7.53
  -8   1  -8    3.34    7.44
  -8   1  -7   26.28   10.47
  -8   1  -6    1.26    2.44
  -8   1  -5   43.35   11.26
  -8   1  -4   37.39    9.88
  -8   1  -3   -0.41    1.29
  -8   1  -3   -4.40    3.12
  -8   1  -2   39.59    9.50
  -8   1  -2   37.16    8.87
  -8   1  -1   24.52    7.31
  -8   1  -1   27.22    7.78
  -8   1   0    3.77    3.56
  -8   1   0   -3.32    3.22
  -8   1   1   12.41    5.10
  -8   1   1    8.37    5.11
  -8   1   2   68.04   12.89
  -8   1   2   63.51   12.26
  -8   1   3    4.43    3.57
  -8   1   3    2.47    2.89
  -8   1   4   19.46    7.71
  -8   1   4   10.71    5.94
  -8   1   5   40.93   11.65
  -8   1   6    4.63    6.37
  -8   1   7   15.49    7.94
  -8   1   8   -0.87    2.62
  -8   1   9   -0.50    2.58
  -8   1  10   15.83    9.10
  -8   1  11    8.93    9.07
  -8   2  -8  -13.98    9.62
  -8   2  -6   -5.84    5.04
  -8   2  -5   99.03   18.80
  -8   2  -4   60.62   13.67
  -8   2  -3   -2.00    2.93
  -8   2  -2   13.01    6.37
  -8   2  -1   28.54    8.71
  -8   2   0   27.99    9.11
  -8   2   1  144.88   19.66
  -8   2   1  153.10   17.40
  -8   2   2   36.43    8.53
  -8   2   2   28.54    9.14
  -8   2   3    5.40    2.06
  -8   2   3    4.56    3.55
  -8   2   4    7.76    3.88
  -8   2   4    5.84    4.36
  -8   2   5   45.52   12.04
  -8   2   5   44.18   12.17
  -8   2   6  -11.13    6.58
  -8   2   6    0.47    2.39
  -8   2   7   32.39   11.43
  -8   2   8   13.55    9.29
  -8   2   9    6.14    4.71
  -8   2  10   -1.96    3.52
  -8   2  11   -9.20    7.35
  -8   2  12  -24.12   12.27
  -8   3  -5   24.78   10.78
  -8   3  -4   11.42    6.53
  -8   3  -3   -3.42    3.87
  -8   3  -2   70.97   15.72
  -8   3  -1   66.25   14.70
  -8   3   0   -2.64    5.81
  -8   3   1   48.00   12.43
  -8   3   2   -2.24    3.08
  -8   3   3   18.34    7.63
  -8   3   4   39.24   12.08
  -8   3   5   32.90   11.40
  -8   3   5   38.82   10.44
  -8   3   6    9.95    5.66
  -8   3   6   -1.68    3.01
  -8   3   7   -4.22    4.61
  -8   3   7   10.53    6.07
  -8   3   8    5.48    5.01
  -8   3   9    0.33    2.32
  -8   3  10    0.64    5.37
  -8   3  11   -6.38    6.08
  -8   3  12    1.80    4.11
  -8   4  -5   -2.10    3.69
  -8   4  -4   -3.26    4.18
  -8   4  -3  -11.47    7.00
  -8   4  -2   34.26   12.09
  -8   4  -1   23.24    9.83
  -8   4   0    9.82    7.18
  -8   4   1    7.06    3.70
  -8   4   2   10.35    5.98
  -8   4   3    3.61    4.04
  -8   4   4   30.57   11.49
  -8   4   5   19.63    8.98
  -8   4   6   37.12   12.85
  -8   4   7   14.07    8.04
  -8   4   8  -12.75    7.86
  -8   4   9   -0.20    1.80
  -8   4  11    1.63    3.56
  -8   4  12    4.51    5.54
  -8   5  -5    3.69    4.83
  -8   5  -4   18.78   10.55
  -8   5  -3   -0.73    2.47
  -8   5  -2   23.09    9.30
  -8   5  -1   10.45    6.78
  -8   5   0   14.33    7.76
  -8   5   1   14.16    8.91
  -8   5   2   12.88    9.22
  -8   5   3   -4.69    4.60
  -8   5   4   10.58    7.41
  -8   5   5    9.01    6.25
  -8   5   6    5.78    5.38
  -8   5   7   31.53   12.28
  -8   5   8    4.73    5.12
  -8   5   9   29.73   12.61
  -8   5  10   -4.89    5.67
  -8   5  11  -15.25    9.82
  -8   6  -4   25.97   12.00
  -8   6  -3   19.19   10.13
  -8   6  -2   17.13   11.05
  -8   6  -1    9.72    7.03
  -8   6   0    5.48    5.41
  -8   6   1   10.99    7.87
  -8   6   2    0.27    2.41
  -8   6   3   -0.93    3.07
  -8   6   4   35.48   13.45
  -8   6   5   -2.67    3.85
  -8   6   6   13.27    8.12
  -8   6   7   16.62    9.19
  -8   6   8   -0.05    1.55
  -8   6   9   -2.77    4.30
  -8   6  10   14.10    9.42
  -8   7  -3    0.34    2.67
  -8   7  -2   27.10   12.36
  -8   7  -1   12.65    8.50
  -8   7   0   -0.89    3.14
  -8   7   1   23.67   11.04
  -8   7   2   13.81    9.02
  -8   7   3   12.87    8.36
  -8   7   4   10.59    7.65
  -8   7   5    4.40    5.17
  -8   7   6    7.67    6.62
  -8   7   7    7.88    7.35
  -8   7   8    2.85    4.44
  -8   7   9   -7.79    7.09
  -8   8  -1   10.18    8.03
  -8   8   0   -2.29    4.11
  -8   8   1    9.46    7.58
  -8   8   2   15.20    9.48
  -8   8   3    2.91    4.60
  -8   8   4   28.68   12.98
  -8   8   5   -2.61    4.39
  -8   8   6   16.41    9.93
  -8   8   7   23.64   11.68
  -7 -17  -8    7.99    6.99
  -7 -17  -7  -17.99   10.22
  -7 -16  -7   10.05    7.09
  -7 -16  -6  -10.94    7.84
  -7 -16  -5   -1.95    3.67
  -7 -16  -4  -15.96    9.43
  -7 -16  -3   -1.30    3.33
  -7 -15  -6   -7.46    6.45
  -7 -15  -5   16.65    9.39
  -7 -15  -4    4.27    5.05
  -7 -15  -3  -20.12   10.33
  -7 -15  -2    1.01    3.17
  -7 -15  -1   10.93   11.86
  -7 -15   0    1.78    3.82
  -7 -14  -6   -0.13    1.85
  -7 -14  -5   35.57   13.31
  -7 -14  -4    2.89    4.06
  -7 -14  -3   22.45   10.53
  -7 -14  -2   26.98   13.23
  -7 -14  -1   -1.96    3.81
  -7 -14   0   11.24    8.98
  -7 -14   1    3.86    7.09
  -7 -14   2    6.35    6.38
  -7 -13  -5   15.51    7.03
  -7 -13  -4   49.96   14.89
  -7 -13  -3    8.21    4.42
  -7 -13  -2   15.60    8.68
  -7 -13  -1   -1.03    2.71
  -7 -13   0   13.73    9.64
  -7 -13   1   15.47    7.39
  -7 -13   2   -7.61    6.68
  -7 -13   3   -8.47    7.29
  -7 -12  -4   13.66    7.56
  -7 -12  -3   -1.80    3.40
  -7 -12  -2   32.43   12.21
  -7 -12  -1   -1.03    3.05
  -7 -12   0   29.52   12.70
  -7 -12   1   35.30   13.56
  -7 -12   2   -6.55    6.13
  -7 -12   3   -0.43    2.57
  -7 -12   4    4.34    5.33
  -7 -11  -4   60.43   15.74
  -7 -11  -3   -6.86    5.65
  -7 -11  -2    7.92    4.90
  -7 -11  -1  -13.86    7.92
  -7 -11   0   16.12    9.31
  -7 -11   1   26.27   10.45
  -7 -11   2   -1.51    3.39
  -7 -11   3    1.79    3.43
  -7 -11   4   11.10    7.51
  -7 -11   5    8.90    7.54
  -7 -10  -3   -0.68    4.10
  -7 -10  -2   33.94   11.88
  -7 -10  -1   16.81    7.27
  -7 -10   0   -4.67    6.28
  -7 -10   1   10.98    8.23
  -7 -10   2    2.04    3.79
  -7 -10   3   20.68   10.32
  -7 -10   4   31.16   12.52
  -7 -10   5    0.07    2.47
  -7 -10   6    3.29    6.29
  -7  -9  -3    5.70    4.82
  -7  -9  -2   47.39   13.88
  -7  -9  -1   53.12   14.24
  -7  -9   0   -2.69    3.94
  -7  -9   1   -3.81    2.27
  -7  -9   2   14.56    9.21
  -7  -9   3   17.11   10.32
  -7  -9   4   67.63   18.62
  -7  -9   5   -5.39    5.71
  -7  -9   6   10.69    8.01
  -7  -9   7   45.69   17.21
  -7  -8  -2   55.17   13.52
  -7  -8  -1  104.82   19.37
  -7  -8   0   -5.20    5.56
  -7  -8   1   13.96    6.80
  -7  -8   2   18.71    9.42
  -7  -8   3   77.90   18.26
  -7  -8   4   16.95    9.74
  -7  -8   5    1.78    4.98
  -7  -8   6    9.23    6.86
  -7  -8   7   -8.85    7.31
  -7  -8   8   -0.24    2.65
  -7  -7  -2  116.40    9.80
  -7  -7  -2  137.44   21.49
  -7  -7  -1   18.77    7.69
  -7  -7  -1   16.11    4.31
  -7  -7   0   -0.17    2.88
  -7  -7   1   49.55   12.84
  -7  -7   2    2.37    4.80
  -7  -7   3   -3.04    3.92
  -7  -7   4   97.09   20.32
  -7  -7   5    5.63    5.17
  -7  -7   6    3.61    5.52
  -7  -7   7    4.74    5.84
  -7  -7   8    0.81    3.05
  -7  -6  -2  176.25   23.62
  -7  -6  -1  105.87   18.10
  -7  -6  -1   74.53    8.02
  -7  -6   0   29.17    5.93
  -7  -6   0   19.66    6.49
  -7  -6   1  148.54   22.51
  -7  -6   2   -0.68    3.45
  -7  -6   3   16.06    8.12
  -7  -6   4   19.71   10.69
  -7  -6   5   11.82    3.55
  -7  -6   6   15.69    9.03
  -7  -6   7   -9.82    7.39
  -7  -6   8    2.27    8.45
  -7  -6   9    5.81    5.76
  -7  -5  -2   96.35   16.57
  -7  -5  -1   38.58    4.53
  -7  -5  -1   62.97   13.26
  -7  -5   0   71.01   14.52
  -7  -5   0   54.43    7.48
  -7  -5   1  260.78   19.84
  -7  -5   1  331.41   32.58
  -7  -5   2   75.26   15.61
  -7  -5   3   10.90    6.09
  -7  -5   4   23.43    8.72
  -7  -5   5    1.61    4.00
  -7  -5   6   18.44    9.31
  -7  -5   7   21.62    9.60
  -7  -5   8   13.82    8.65
  -7  -5   9    7.18    6.87
  -7  -5  10   16.94   10.39
  -7  -4 -10   22.09   11.28
  -7  -4  -9   10.43    7.46
  -7  -4  -8   74.94   17.71
  -7  -4  -7   94.65   18.46
  -7  -4  -6   82.53   16.45
  -7  -4  -5   40.03   10.08
  -7  -4  -4   28.45    9.27
  -7  -4  -3   37.19    8.98
  -7  -4  -2   77.40   11.36
  -7  -4  -1   51.94    8.16
  -7  -4  -1   65.66   13.18
  -7  -4   0   28.20    9.24
  -7  -4   0   21.55    4.24
  -7  -4   1  204.73   16.72
  -7  -4   1  208.36   24.98
  -7  -4   2    1.44    2.62
  -7  -4   3    0.61    5.04
  -7  -4   4   56.86   14.57
  -7  -4   5   29.30   10.41
  -7  -4   6   45.45   14.03
  -7  -4   7   -2.70    4.09
  -7  -4   8    8.28    6.75
  -7  -4   9   13.31   11.12
  -7  -4  10   16.51   12.66
  -7  -3 -12    7.28    7.08
  -7  -3 -11   20.80    9.46
  -7  -3 -10   19.58   10.12
  -7  -3  -9   20.52    9.61
  -7  -3  -8  100.21   20.36
  -7  -3  -7   22.41   10.58
  -7  -3  -6    0.99    4.42
  -7  -3  -5  106.52   17.53
  -7  -3  -4   60.50   12.75
  -7  -3  -3   45.57    9.82
  -7  -3  -2   22.09    6.47
  -7  -3  -1   44.48    8.33
  -7  -3  -1   25.06    3.47
  -7  -3  -1   36.43    9.06
  -7  -3  -1   23.84    3.26
  -7  -3   0  181.49   13.03
  -7  -3   0  206.48   16.37
  -7  -3   0  184.13   22.26
  -7  -3   1  175.25   13.16
  -7  -3   1  143.19   14.09
  -7  -3   1  189.35   23.03
  -7  -3   2   63.06    6.46
  -7  -3   2   95.17   16.75
  -7  -3   3    4.53    1.96
  -7  -3   4   24.47   10.27
  -7  -3   5   13.95    8.48
  -7  -3   6   54.45   14.96
  -7  -3   7   44.42   13.50
  -7  -3   8    4.12    5.97
  -7  -3   9   21.44   10.67
  -7  -3  10   14.37   10.75
  -7  -3  11   -4.13    5.74
  -7  -2 -13    2.07    4.85
  -7  -2 -12    4.79    6.40
  -7  -2 -11   10.33    6.27
  -7  -2 -10   91.48   22.75
  -7  -2  -9   24.99   11.70
  -7  -2  -8    9.55    6.15
  -7  -2  -7   -0.21    6.33
  -7  -2  -6    3.59    5.21
  -7  -2  -5  137.86   20.94
  -7  -2  -4   35.56    9.81
  -7  -2  -4   14.50    3.79
  -7  -2  -3   16.99    3.64
  -7  -2  -2  113.80    8.79
  -7  -2  -1   18.05    6.67
  -7  -2  -1   17.05    3.58
  -7  -2   0  172.61   13.10
  -7  -2   0  171.62   20.70
  -7  -2   1  116.95   17.77
  -7  -2   2    0.16    2.44
  -7  -2   3   31.32    9.88
  -7  -2   4  122.52   19.55
  -7  -2   5   -5.45    7.74
  -7  -2   6   15.95    6.42
  -7  -2   7   41.80   12.70
  -7  -2   8   -0.22    5.76
  -7  -2   9   20.57    9.64
  -7  -2  10   15.12    8.92
  -7  -2  11    0.03    7.11
  -7  -1 -12   -3.27    2.82
  -7  -1 -11    0.71    8.12
  -7  -1 -10    6.65    6.64
  -7  -1  -9    0.02    4.32
  -7  -1  -8    9.37    7.19
  -7  -1  -7   22.99    9.85
  -7  -1  -6    0.62    1.67
  -7  -1  -6    7.80    4.34
  -7  -1  -5   47.07    9.19
  -7  -1  -4    1.36    1.91
  -7  -1  -3   22.61    5.43
  -7  -1  -2   78.03   14.54
  -7  -1  -2   97.63   10.52
  -7  -1  -1   76.21   13.40
  -7  -1  -1   86.71   10.19
  -7  -1   0  125.00   12.46
  -7  -1   0  112.83   15.91
  -7  -1   1  178.80   16.29
  -7  -1   1  207.04   22.33
  -7  -1   2   23.78    7.98
  -7  -1   3  203.54   23.96
  -7  -1   4   75.79   15.58
  -7  -1   5    6.96    3.83
  -7  -1   6   43.29   12.76
  -7  -1   7  102.85   20.22
  -7  -1   8    1.72    2.42
  -7  -1   9   11.83    7.78
  -7  -1  10    8.04    6.49
  -7  -1  11   -3.60    5.23
  -7   0 -11   22.90   12.51
  -7   0 -10   23.64   12.02
  -7   0  -9   -9.79    7.82
  -7   0  -8   26.58   12.70
  -7   0  -7  -11.74    7.77
  -7   0  -7    6.45    4.43
  -7   0  -6   78.28   14.60
  -7   0  -5  154.78   18.61
  -7   0  -4   48.22    9.94
  -7   0  -3    5.06    3.17
  -7   0  -2   25.73    6.65
  -7   0  -2   21.75    8.11
  -7   0  -1    4.54    2.65
  -7   0  -1    3.46    2.14
  -7   0   0  258.64   20.22
  -7   0   0  269.36   23.53
  -7   0   1  224.15   19.72
  -7   0   1  234.30   22.90
  -7   0   2   -1.70    3.12
  -7   0   2    5.23    3.69
  -7   0   3  115.93   17.30
  -7   0   4   53.60   12.21
  -7   0   5   -4.50    3.90
  -7   0   6   19.62    8.60
  -7   0   7   76.68   16.92
  -7   0   8   -0.92    2.75
  -7   0   9   75.86   19.49
  -7   0  10   24.59   12.52
  -7   0  11    4.64    7.60
  -7   0  12   -7.44    7.27
  -7   1 -11    9.76    9.50
  -7   1 -10   -1.60    4.54
  -7   1  -9    8.27    4.92
  -7   1  -8   95.14   22.40
  -7   1  -8   92.59   19.07
  -7   1  -7   48.30   12.49
  -7   1  -6    8.03    5.15
  -7   1  -5   61.47   13.24
  -7   1  -4   18.72    6.92
  -7   1  -3   74.36   12.86
  -7   1  -2  174.84   18.81
  -7   1  -2  127.04   15.63
  -7   1  -1   85.25   12.25
  -7   1  -1   65.92   11.78
  -7   1   0    0.02    2.82
  -7   1   0   -0.88    3.07
  -7   1   1    0.60    1.92
  -7   1   1   -0.39    1.57
  -7   1   2   81.42   13.26
  -7   1   2   95.17   14.33
  -7   1   3  324.58   27.76
  -7   1   3  282.21   26.23
  -7   1   4   29.24    8.39
  -7   1   5   42.11   11.23
  -7   1   6    2.20    2.53
  -7   1   7    4.85    4.25
  -7   1   8   21.05    9.30
  -7   1   9   22.49    9.67
  -7   1  10   27.51   13.33
  -7   1  11   -0.02    2.87
  -7   1  12    4.19    5.59
  -7   2 -10   -6.84    7.52
  -7   2  -9    6.14    8.82
  -7   2  -9   -4.64    5.07
  -7   2  -8   10.81    8.45
  -7   2  -8    9.45    6.09
  -7   2  -7   11.24    7.22
  -7   2  -6    3.63    5.08
  -7   2  -5  101.87   18.51
  -7   2  -4   10.02    6.01
  -7   2  -3    2.90    2.23
  -7   2  -3    1.89    2.47
  -7   2  -2    7.88    4.01
  -7   2  -2   10.92    5.39
  -7   2  -1    3.95    2.35
  -7   2  -1    9.93    6.21
  -7   2   0   47.04    8.70
  -7   2   0   52.25   11.04
  -7   2   1   37.54    8.66
  -7   2   1   44.25    8.72
  -7   2   2   25.05    8.06
  -7   2   2   30.63    7.29
  -7   2   3   -7.48    4.59
  -7   2   3   -1.82    2.04
  -7   2   4   27.09    7.83
  -7   2   4   23.91    8.93
  -7   2   5    0.70    1.63
  -7   2   6   40.84   11.24
  -7   2   7    1.45    2.70
  -7   2   8    6.78    6.03
  -7   2   9   36.30   12.14
  -7   2  10   -9.39    6.99
  -7   2  11   -2.83    4.52
  -7   2  12    8.05    7.23
  -7   3  -9    9.24    7.20
  -7   3  -9   13.12    9.09
  -7   3  -8   31.64   12.40
  -7   3  -7   22.88   10.02
  -7   3  -6   -4.93    4.77
  -7   3  -5   -2.84    3.63
  -7   3  -4   12.14    6.61
  -7   3  -3   -2.87    4.20
  -7   3  -2  242.50   27.40
  -7   3  -1   93.41   16.50
  -7   3   0   22.87    8.39
  -7   3   1   -1.03    1.39
  -7   3   1    0.43    1.91
  -7   3   2   42.16   10.81
  -7   3   2   43.18    8.31
  -7   3   3    3.73    3.64
  -7   3   3    9.34    3.67
  -7   3   4    9.39    4.12
  -7   3   4    6.82    3.93
  -7   3   5    1.64    2.67
  -7   3   5    1.79    3.23
  -7   3   6    0.72    2.36
  -7   3   6   -0.33    3.17
  -7   3   7    0.79    2.85
  -7   3   8   15.02    6.82
  -7   3   9   20.03    9.50
  -7   3  10   -0.93    3.05
  -7   3  11   -0.16    2.53
  -7   3  12    0.02    5.77
  -7   3  13   10.41    8.23
  -7   4  -9    7.78    7.00
  -7   4  -8   -1.81    3.66
  -7   4  -7   -3.87    6.58
  -7   4  -6   36.84   13.10
  -7   4  -5   -5.53    5.23
  -7   4  -4    0.28    3.15
  -7   4  -3   -4.57    2.69
  -7   4  -2   33.48   11.15
  -7   4  -1   14.56    7.60
  -7   4   0    2.88    3.68
  -7   4   1  166.33   23.61
  -7   4   2   -4.59    5.07
  -7   4   3   35.69   10.73
  -7   4   4   17.57    7.84
  -7   4   5   -0.02    1.82
  -7   4   5   -3.66    4.12
  -7   4   6   29.81    8.77
  -7   4   6   25.82   10.16
  -7   4   7   -9.15    6.41
  -7   4   7    5.61    3.06
  -7   4   8   -4.24    4.23
  -7   4   9    0.09    6.42
  -7   4  10    1.52    3.38
  -7   4  11   -1.80    3.39
  -7   4  12   -0.29    2.57
  -7   4  13    2.11    2.74
  -7   5  -8   14.42    9.61
  -7   5  -7  -14.87    9.29
  -7   5  -6   38.30   14.43
  -7   5  -5    4.76    5.15
  -7   5  -4   -2.85    4.13
  -7   5  -3   47.26   13.92
  -7   5  -2   56.56   14.99
  -7   5  -1    2.93    3.95
  -7   5   0    5.96    4.99
  -7   5   1   14.72    7.24
  -7   5   2    2.55    3.58
  -7   5   3  -15.06    7.59
  -7   5   4  136.64   22.82
  -7   5   5   10.25    6.77
  -7   5   6   57.72   16.77
  -7   5   7   27.99   11.17
  -7   5   8  -12.39    7.72
  -7   5   9   22.01   10.93
  -7   5  10   -1.85    3.26
  -7   5  11    4.59    5.04
  -7   5  12    7.83    6.66
  -7   5  13    2.06    4.34
  -7   6  -7   -2.15    4.10
  -7   6  -6   12.50    8.79
  -7   6  -5    1.82    3.64
  -7   6  -4    6.60    6.13
  -7   6  -3   16.65   11.34
  -7   6  -2   17.89    8.66
  -7   6  -1    4.93    5.94
  -7   6   0  120.68   23.38
  -7   6   1   26.46   10.78
  -7   6   2    5.56    6.16
  -7   6   3   -2.51    3.90
  -7   6   4   -1.09    2.76
  -7   6   5    6.91    4.44
  -7   6   6   11.27    7.26
  -7   6   7   52.68   16.85
  -7   6   8   -0.31    4.13
  -7   6   9   -2.27    4.05
  -7   6  10   -3.89    5.16
  -7   6  11    4.82    8.08
  -7   6  11    7.69    6.98
  -7   6  12   10.43    6.66
  -7   6  13    0.06    9.51
  -7   7  -5   21.58   11.64
  -7   7  -4   15.00    9.52
  -7   7  -3    2.10    3.87
  -7   7  -2    5.33    5.62
  -7   7  -1   11.14    8.73
  -7   7   0   24.40   10.28
  -7   7   1   21.14    9.89
  -7   7   2   11.37    6.06
  -7   7   3   -0.44    2.91
  -7   7   4   13.87    9.29
  -7   7   5   -5.45    7.00
  -7   7   6  -10.63    7.32
  -7   7   7    4.05    4.74
  -7   7   8   -4.55    5.12
  -7   7   9   -6.40    6.38
  -7   7  10   12.64    8.80
  -7   8  -3   -4.64    5.75
  -7   8  -2   -7.86    7.27
  -7   8  -1   21.05   11.04
  -7   8   0   11.37    7.66
  -7   8   1    5.78    6.01
  -7   8   2  -15.51    9.28
  -7   8   3    2.54    4.34
  -7   8   4   -1.95    3.98
  -7   8   5   19.88   10.11
  -7   8   6    4.96    5.46
  -7   8   7   24.03   11.40
  -7   8   8    1.84    4.04
  -7   8   9    9.44    7.63
  -7   9   0    5.93    6.49
  -7   9   1   22.77   13.28
  -7   9   2    8.90    7.49
  -7   9   3   26.23   12.63
  -7   9   4   -2.58    4.61
  -7   9   5  -12.79    8.87
  -7   9   6   17.69   11.50
  -7   9   7  -15.73    9.80
  -7   9   8    9.28    7.76
  -6 -16  -7   -7.70    6.41
  -6 -16  -6  -12.23    7.94
  -6 -15  -6    3.03    4.18
  -6 -15  -5   14.95    8.43
  -6 -15  -4    7.99    7.17
  -6 -15  -3    1.40    3.10
  -6 -15  -2    7.71    6.29
  -6 -14  -6    9.19    6.76
  -6 -14  -5   25.80   10.80
  -6 -14  -4   13.80    8.11
  -6 -14  -3    6.48    5.61
  -6 -14  -2    3.23    5.14
  -6 -14  -1   -1.52    3.22
  -6 -14   0   12.47    7.91
  -6 -14   1    0.09    4.11
  -6 -13  -5   16.09    7.23
  -6 -13  -4    1.26    2.98
  -6 -13  -3   -5.18    4.90
  -6 -13  -2   14.83    7.30
  -6 -13  -1   -0.82    2.56
  -6 -13   0   13.33    7.96
  -6 -13   1   11.31    7.47
  -6 -13   2   13.39    8.28
  -6 -13   3    0.02    4.74
  -6 -13   4   -3.44    4.83
  -6 -12  -4   -0.32    4.76
  -6 -12  -3   10.01    6.54
  -6 -12  -2   26.33   10.40
  -6 -12  -1    8.63    6.58
  -6 -12   0   19.76   10.54
  -6 -12   1   35.06   12.63
  -6 -12   2    0.25    4.87
  -6 -12   3   12.81    6.71
  -6 -12   4   43.62   15.22
  -6 -12   5   -8.26    7.03
  -6 -11  -4    2.67    2.18
  -6 -11  -3   98.10   19.18
  -6 -11  -2  136.06   22.54
  -6 -11  -1   -4.12    4.56
  -6 -11   0   16.05    9.17
  -6 -11   1   29.02   12.32
  -6 -11   2   -6.92    5.81
  -6 -11   3    2.00    3.47
  -6 -11   4   55.88   16.97
  -6 -11   5   -5.61    5.93
  -6 -11   6   14.34   11.07
  -6 -10  -3  140.59   22.56
  -6 -10  -2   89.28   17.87
  -6 -10  -1    5.32    5.79
  -6 -10   0   95.46   18.87
  -6 -10   1   48.04   13.69
  -6 -10   2   -0.43    4.28
  -6 -10   3   40.71   14.04
  -6 -10   4    8.61    5.38
  -6 -10   5    6.15    5.83
  -6 -10   6    7.51    6.73
  -6 -10   7   15.50    9.63
  -6  -9  -2   58.80   13.92
  -6  -9  -1    6.60    4.61
  -6  -9   0   61.87   14.67
  -6  -9   1   17.29    8.37
  -6  -9   2   38.49   12.29
  -6  -9   3   43.39   13.22
  -6  -9   4   35.28   13.12
  -6  -9   5   21.70   10.05
  -6  -9   6    4.58    4.01
  -6  -9   7   10.49    7.88
  -6  -9   8    4.94    5.81
  -6  -8  -3   85.63   10.71
  -6  -8  -2    1.77    2.20
  -6  -8  -2    1.99    2.14
  -6  -8  -1   16.91    7.50
  -6  -8   0   27.20    9.10
  -6  -8   1   -5.52    6.22
  -6  -8   2    6.64    3.48
  -6  -8   3  213.86   28.76
  -6  -8   4    2.58    2.32
  -6  -8   5   48.29   13.68
  -6  -8   6   20.45    9.55
  -6  -8   7    1.75    3.72
  -6  -8   8    7.12    6.70
  -6  -7  -2   27.76    5.45
  -6  -7  -2   24.68    8.62
  -6  -7  -1    4.96    2.60
  -6  -7  -1    2.90    3.26
  -6  -7   0   40.58   11.21
  -6  -7   1  106.27   19.00
  -6  -7   2    0.66    4.05
  -6  -7   3   11.72    5.23
  -6  -7   4    6.77    5.52
  -6  -7   5    6.92    5.38
  -6  -7   6   64.22   17.38
  -6  -7   7   22.54   10.84
  -6  -7   8    2.23    4.09
  -6  -7   9   12.68   10.10
  -6  -6  -2   10.40    2.47
  -6  -6  -1   17.47    7.02
  -6  -6  -1   12.03    3.64
  -6  -6   0   15.94    6.96
  -6  -6   0    7.24    3.78
  -6  -6   1  199.08   24.36
  -6  -6   2   21.56    8.27
  -6  -6   3   42.44   12.33
  -6  -6   4   35.07   11.74
  -6  -6   5    3.24    2.24
  -6  -6   6    3.82    3.98
  -6  -6   7   28.05   11.21
  -6  -6   8   -5.47    5.64
  -6  -6   9   13.12    9.26
  -6  -6  10   26.44   13.74
  -6  -5  -1   12.83    3.21
  -6  -5  -1    9.40    2.42
  -6  -5   0  271.59   26.78
  -6  -5   0  255.01   16.91
  -6  -5   1  291.30   28.99
  -6  -5   1  218.13   18.17
  -6  -5   2    9.13    6.09
  -6  -5   3    2.29    2.86
  -6  -5   4    7.32    5.63
  -6  -5   5   -0.97    3.91
  -6  -5   6   14.47    6.56
  -6  -5   7   28.83   11.96
  -6  -5   8   -3.28    4.61
  -6  -5   9   13.43    8.69
  -6  -5  10   12.31    8.70
  -6  -4  -9   13.07    7.65
  -6  -4  -8  121.77   20.84
  -6  -4  -7   64.48   14.76
  -6  -4  -6  154.04   21.12
  -6  -4  -5    3.97    3.75
  -6  -4  -4  230.57   22.16
  -6  -4  -3    4.47    3.13
  -6  -4  -2  120.67   12.95
  -6  -4  -1   13.74    2.41
  -6  -4  -1   23.83    7.61
  -6  -4   0  195.57   13.25
  -6  -4   0  203.13   22.40
  -6  -4   1  218.22   17.15
  -6  -4   1  224.99   24.58
  -6  -4   2   -0.04    3.08
  -6  -4   3   54.45   12.62
  -6  -4   4   13.42    6.69
  -6  -4   5   21.02    8.23
  -6  -4   6   30.37   10.76
  -6  -4   7    1.93    2.75
  -6  -4   8    6.37    5.84
  -6  -4   9    1.62    3.72
  -6  -4  10   21.58   11.24
  -6  -4  11    9.06    9.62
  -6  -3 -11   20.10    9.75
  -6  -3 -10   10.92    7.49
  -6  -3  -9   43.40   13.78
  -6  -3  -8   19.44    9.94
  -6  -3  -7    0.35    4.56
  -6  -3  -6  242.08   26.87
  -6  -3  -5  160.69   20.42
  -6  -3  -4    2.86    2.44
  -6  -3  -3  217.69   20.74
  -6  -3  -2   18.95    5.87
  -6  -3  -1    3.44    1.15
  -6  -3  -1    4.82    1.49
  -6  -3  -1    2.12    2.41
  -6  -3  -1    2.36    2.37
  -6  -3   0  495.44   20.40
  -6  -3   0  595.47   37.24
  -6  -3   0  579.94   24.09
  -6  -3   1   65.19   12.66
  -6  -3   1   65.34    8.77
  -6  -3   1   63.18    6.49
  -6  -3   2    5.66    3.09
  -6  -3   2    5.18    2.59
  -6  -3   3  184.31   22.85
  -6  -3   4   24.78    9.20
  -6  -3   5   27.84    9.48
  -6  -3   6    3.44    3.43
  -6  -3   7   -3.05    5.68
  -6  -3   8   -0.64    3.24
  -6  -3   9   73.02   19.11
  -6  -3  10   -1.29    3.42
  -6  -3  11   -4.23    5.66
  -6  -2 -12   -2.86   10.12
  -6  -2 -11    7.41    7.80
  -6  -2 -10    2.81    4.67
  -6  -2  -9    4.15    5.07
  -6  -2  -8  112.01   20.80
  -6  -2  -7   18.25    8.31
  -6  -2  -6   52.98   12.99
  -6  -2  -5   61.50   13.28
  -6  -2  -4   79.86    8.82
  -6  -2  -4   64.76   12.51
  -6  -2  -3   81.75    7.33
  -6  -2  -2  691.92   19.10
  -6  -2  -1   10.19    2.48
  -6  -2  -1   24.73    7.30
  -6  -2   0  179.09   12.30
  -6  -2   0  188.94   20.30
  -6  -2   1   55.58   11.47
  -6  -2   2  128.52   17.78
  -6  -2   3  527.99   37.52
  -6  -2   4   63.54   13.88
  -6  -2   5   -1.52    3.54
  -6  -2   6    3.82    3.72
  -6  -2   7    2.34    4.93
  -6  -2   8   15.69    8.35
  -6  -2   9   45.80   14.85
  -6  -2  10   14.63    8.66
  -6  -2  11    7.50    8.17
  -6  -2  12    9.06   10.79
  -6  -1 -13    8.27    8.62
  -6  -1 -12   -1.59    5.88
  -6  -1 -11   -3.06    5.09
  -6  -1 -10   20.02   10.52
  -6  -1  -9   13.85    8.26
  -6  -1  -8  100.27   21.24
  -6  -1  -7   -5.34    6.64
  -6  -1  -6   97.04   17.92
  -6  -1  -6  103.27   14.46
  -6  -1  -5  102.00   13.10
  -6  -1  -5   96.86   17.58
  -6  -1  -4    4.88    2.90
  -6  -1  -3   16.39    4.20
  -6  -1  -2   78.60    8.69
  -6  -1  -1   25.32    4.90
  -6  -1  -1   34.78    8.08
  -6  -1   0  348.64   25.83
  -6  -1   0  330.97   18.76
  -6  -1   1  292.13   24.74
  -6  -1   2   25.17    7.70
  -6  -1   3  283.25   26.47
  -6  -1   4   64.36   13.67
  -6  -1   5   36.98   10.67
  -6  -1   6   34.26   11.01
  -6  -1   7   32.53   11.32
  -6  -1   8   10.31    6.15
  -6  -1   9   50.33   14.83
  -6  -1  10    8.85    5.97
  -6  -1  11   28.13   14.19
  -6  -1  12    8.50    8.30
  -6   0 -12   13.58    7.53
  -6   0 -11    2.42    7.07
  -6   0 -10   23.48   11.60
  -6   0  -9  103.02   22.95
  -6   0  -8   32.98   12.54
  -6   0  -7   18.99    8.02
  -6   0  -7   -4.82    7.65
  -6   0  -6   19.70    7.32
  -6   0  -5   44.79    9.83
  -6   0  -4   46.85    9.37
  -6   0  -3   11.32    4.40
  -6   0  -2  109.41   12.51
  -6   0  -1   59.29    9.14
  -6   0  -1   64.18   10.47
  -6   0   0   10.21    3.93
  -6   0   0    7.19    3.09
  -6   0   1    8.99    3.43
  -6   0   1   14.41    5.51
  -6   0   2   16.55    5.94
  -6   0   3  751.32   41.43
  -6   0   4  219.70   23.33
  -6   0   5    2.48    3.81
  -6   0   6    3.81    4.44
  -6   0   7   -0.65    3.68
  -6   0   8   17.64    9.82
  -6   0   9   96.79   20.91
  -6   0  10    2.96    6.24
  -6   0  11   -6.97    6.57
  -6   0  12   -2.33    4.40
  -6   1 -12    6.77    9.13
  -6   1 -11   15.74   10.41
  -6   1 -10  -13.68    9.36
  -6   1  -9   35.47   13.07
  -6   1  -8   60.08   14.63
  -6   1  -8   59.97   17.81
  -6   1  -7   29.84   10.33
  -6   1  -6   84.47   15.90
  -6   1  -5    0.42    2.11
  -6   1  -4   28.07    7.89
  -6   1  -3    7.33    3.33
  -6   1  -3    2.51    3.24
  -6   1  -2   71.17   10.51
  -6   1  -2   53.58    9.82
  -6   1  -1    8.94    4.26
  -6   1  -1   13.25    4.63
  -6   1  -1   15.20    5.09
  -6   1   0   57.91    9.97
  -6   1   0   47.20    9.11
  -6   1   1    4.91    3.20
  -6   1   1    0.35    1.64
  -6   1   2    1.97    2.58
  -6   1   2    2.26    2.67
  -6   1   3   30.77    8.05
  -6   1   4    2.63    2.80
  -6   1   5   -0.01    2.33
  -6   1   6  139.81   20.49
  -6   1   7   97.37   17.90
  -6   1   8   40.52   12.38
  -6   1   9   38.19   12.46
  -6   1  10    5.21    6.88
  -6   1  11   22.29   10.99
  -6   1  12    8.93    7.47
  -6   1  13   21.19   11.67
  -6   2 -11   72.78   23.04
  -6   2 -10   -1.68    4.48
  -6   2  -9   18.79   12.84
  -6   2  -9    6.92    6.19
  -6   2  -8   15.44    8.48
  -6   2  -8   17.43    9.01
  -6   2  -7   25.15    9.80
  -6   2  -6  152.18   22.71
  -6   2  -5   -3.23    4.65
  -6   2  -4   -5.33    5.01
  -6   2  -3   63.71   12.61
  -6   2  -2   14.57    4.48
  -6   2  -2   17.31    4.67
  -6   2  -2   10.74    4.33
  -6   2  -1   71.59    9.37
  -6   2  -1   81.37   13.34
  -6   2  -1   68.64    9.41
  -6   2   0   39.59    7.19
  -6   2   0   39.32    7.16
  -6   2   0   31.44    7.91
  -6   2   1   80.59   10.69
  -6   2   1   67.15   10.33
  -6   2   1  100.63   14.74
  -6   2   2  131.47   14.63
  -6   2   2  137.53   17.29
  -6   2   3  214.77   23.24
  -6   2   3  213.37   19.86
  -6   2   4    3.00    1.46
  -6   2   5   -0.47    3.75
  -6   2   6   31.97    9.67
  -6   2   7    4.29    5.71
  -6   2   8   12.40    7.11
  -6   2   9  172.30   26.13
  -6   2  10    3.13    4.06
  -6   2  11    7.87    4.93
  -6   2  12   18.97   10.99
  -6   2  13   11.63    8.73
  -6   3 -10   -1.00    3.87
  -6   3  -9    0.77    3.04
  -6   3  -9   -3.68    5.55
  -6   3  -8   91.68   22.26
  -6   3  -7    6.82    5.73
  -6   3  -6   20.64   10.08
  -6   3  -5    5.26    5.92
  -6   3  -4   44.76   11.86
  -6   3  -3  244.19   26.77
  -6   3  -2   65.24   13.87
  -6   3  -2   44.32    6.64
  -6   3  -1   -1.33    1.26
  -6   3  -1   10.79    6.37
  -6   3   0   82.43    8.77
  -6   3   0   98.50   15.99
  -6   3   1   22.56    5.03
  -6   3   1    9.27    4.58
  -6   3   1   15.25    4.20
  -6   3   2  260.57   25.69
  -6   3   2  247.29   18.25
  -6   3   3   87.48   15.62
  -6   3   3   97.95   12.53
  -6   3   4   16.76    5.57
  -6   3   4   11.47    5.66
  -6   3   5  132.10   17.60
  -6   3   5  107.50   18.49
  -6   3   6  137.10   18.97
  -6   3   7    4.39    4.63
  -6   3   8    7.95    4.42
  -6   3   9   -4.04    4.41
  -6   3  10   -4.90    4.36
  -6   3  11    4.93    7.78
  -6   3  12   19.11   11.70
  -6   3  13   17.30    8.54
  -6   4 -10    2.30    4.42
  -6   4  -9    2.05    4.02
  -6   4  -9    7.82    8.07
  -6   4  -8   -1.93    3.87
  -6   4  -7   -0.38    2.39
  -6   4  -6   57.80   16.17
  -6   4  -5   82.93   19.22
  -6   4  -4   13.82    7.74
  -6   4  -3    0.82    3.79
  -6   4  -2   98.17   18.11
  -6   4  -1   14.76    7.44
  -6   4   0  558.01   40.99
  -6   4   1   54.81   13.00
  -6   4   2   27.82    7.77
  -6   4   2   47.09    6.92
  -6   4   3    2.28    3.89
  -6   4   3    3.86    2.01
  -6   4   4   13.00    4.85
  -6   4   4    5.83    4.62
  -6   4   5  214.44   21.08
  -6   4   5  222.82   27.49
  -6   4   6   92.50   18.11
  -6   4   6  108.28   16.14
  -6   4   7   -5.19    4.23
  -6   4   8   13.42    6.30
  -6   4   9    6.94    5.03
  -6   4  10   -4.01    5.37
  -6   4  11   27.59   11.51
  -6   4  12   23.16   11.36
  -6   4  13    7.45   10.16
  -6   5  -9   28.69   13.55
  -6   5  -8   17.56   10.29
  -6   5  -7    0.83    4.81
  -6   5  -6   41.85   15.03
  -6   5  -5   10.42    7.19
  -6   5  -4   -2.82    2.94
  -6   5  -3   11.74    7.10
  -6   5  -2   35.85   12.08
  -6   5  -1    2.34    2.54
  -6   5   0    7.53    5.64
  -6   5   1   32.39   11.87
  -6   5   2   -7.50    5.57
  -6   5   3  122.14   20.60
  -6   5   4    3.78    3.93
  -6   5   5   89.83   19.03
  -6   5   5   83.12   12.16
  -6   5   6    7.92    6.62
  -6   5   6    7.78    4.47
  -6   5   7   19.19   10.26
  -6   5   7   19.36    6.95
  -6   5   8   27.71    9.54
  -6   5   8   25.04   10.92
  -6   5   9   14.59    7.29
  -6   5  10    5.98    5.27
  -6   5  11   17.36    9.78
  -6   5  12   15.55    9.01
  -6   5  13    2.84    5.08
  -6   5  13   12.95    9.75
  -6   5  14    3.62    5.32
  -6   6  -8   -8.05    7.69
  -6   6  -7   -0.03    2.53
  -6   6  -6   69.74   21.72
  -6   6  -5   14.03    9.81
  -6   6  -4   18.72    9.76
  -6   6  -3  -10.45    7.23
  -6   6  -2    1.31    4.70
  -6   6  -1   17.04    8.77
  -6   6   0   82.68   18.64
  -6   6   1   -8.05    5.87
  -6   6   2   10.77    6.83
  -6   6   3    3.92    3.59
  -6   6   4   22.17    9.84
  -6   6   5    9.07    5.19
  -6   6   6   28.86   10.63
  -6   6   7   16.05    8.72
  -6   6   8   15.77    8.66
  -6   6   9    8.44    8.52
  -6   6   9    3.18    5.32
  -6   6  10   12.88    9.67
  -6   6  10   10.71    6.55
  -6   6  11   -0.02    2.15
  -6   6  11    4.34    5.96
  -6   6  12    7.48    6.81
  -6   6  12   17.74    9.56
  -6   6  13  -18.90   10.91
  -6   7  -6   11.24    8.43
  -6   7  -5   14.99    9.64
  -6   7  -4    4.01    5.29
  -6   7  -3   45.74   15.68
  -6   7  -2   10.53    7.52
  -6   7  -1    8.12    6.32
  -6   7   0    8.68    9.77
  -6   7   1    3.59    4.38
  -6   7   2    5.01    5.09
  -6   7   3   90.62   19.92
  -6   7   4  -12.10    7.43
  -6   7   5   -7.69    5.93
  -6   7   6    6.97    5.83
  -6   7   7    1.94    1.86
  -6   7   8   -1.73    3.50
  -6   7   9   20.84   10.49
  -6   7  10   -1.25    3.34
  -6   7  11    3.83    4.87
  -6   7  11   10.10    7.83
  -6   7  12   -3.79    4.86
  -6   7  13    4.10    5.54
  -6   8  -4   18.74   10.97
  -6   8  -3   22.73   12.57
  -6   8  -2    7.76    6.80
  -6   8  -1   41.65   15.44
  -6   8   0   50.41   15.90
  -6   8   1    6.42    7.71
  -6   8   2    6.07    5.80
  -6   8   3    6.68    5.97
  -6   8   4    0.21    2.28
  -6   8   5    4.89    5.28
  -6   8   6   22.28   10.43
  -6   8   7    3.13    4.36
  -6   8   8   18.60    9.97
  -6   8   9   -1.16    3.23
  -6   8  10   -2.11    3.71
  -6   8  11    5.48    5.69
  -6   9  -2   12.25    8.93
  -6   9  -1   15.83    9.46
  -6   9   0   11.11    9.47
  -6   9   1    3.22    4.81
  -6   9   2   15.33    9.56
  -6   9   3   82.52   21.15
  -6   9   4   30.83   13.05
  -6   9   5    5.44    5.78
  -6   9   6   -2.68    4.33
  -6   9   7    0.84    3.01
  -6   9   8   19.52   10.49
  -6   9   9   18.39    8.18
  -6   9  10  -16.18   10.12
  -6  10   1   33.85   14.67
  -6  10   2    6.95   10.87
  -6  10   3   45.44   17.88
  -6  10   4   -8.05    7.44
  -6  10   5   18.07   12.74
  -6  10   6    6.16    6.48
  -6  10   7  -15.05    9.78
  -6  10   8   14.42    9.89
  -5 -15  -6   16.90    8.65
  -5 -15  -5    8.47    5.28
  -5 -14  -5   12.08    8.37
  -5 -14  -4   -2.81    3.68
  -5 -14  -3   -3.89    4.34
  -5 -14  -2   -0.38    2.20
  -5 -14  -1   12.59    6.42
  -5 -13  -5    4.57    4.41
  -5 -13  -4   -2.44    4.30
  -5 -13  -3    6.36    5.14
  -5 -13  -2   18.67    9.19
  -5 -13  -1    5.11    3.52
  -5 -13   0   25.39   10.61
  -5 -13   1    4.57    6.41
  -5 -13   2   -3.51    4.31
  -5 -12  -4    4.72    5.09
  -5 -12  -3  100.51   19.06
  -5 -12  -2   26.02    9.93
  -5 -12  -1   -2.94    3.62
  -5 -12   0   45.40   13.33
  -5 -12   1   19.66    8.22
  -5 -12   2   -0.57    2.24
  -5 -12   3  -11.60    7.37
  -5 -12   4   35.63   13.52
  -5 -12   5    1.34    3.33
  -5 -11  -3   48.12   12.74
  -5 -11  -2   24.99    8.66
  -5 -11  -1   -4.06    4.06
  -5 -11   0   -2.23    2.08
  -5 -11   1   17.84    8.88
  -5 -11   2    8.59    6.10
  -5 -11   3   11.88    4.68
  -5 -11   4   17.17   10.08
  -5 -11   5   23.04    9.88
  -5 -11   6   -2.58    4.18
  -5 -11   7    3.37    4.02
  -5 -10  -3  121.08   19.82
  -5 -10  -2   -4.92    4.47
  -5 -10  -1   27.87    9.81
  -5 -10   0    6.25    5.04
  -5 -10   1   15.89    8.83
  -5 -10   2   22.88    9.56
  -5 -10   3    6.64    4.81
  -5 -10   4    7.60    4.50
  -5 -10   5   22.67   11.36
  -5 -10   6   17.34   10.10
  -5 -10   7   11.71    3.95
  -5 -10   8   -1.63    3.82
  -5  -9  -2    9.99    5.21
  -5  -9  -1   29.67    9.79
  -5  -9   0   69.33   14.66
  -5  -9   1   14.68    6.89
  -5  -9   2   31.56   11.05
  -5  -9   3   28.33   10.32
  -5  -9   4    6.77    5.90
  -5  -9   5   41.47   14.28
  -5  -9   6    0.78    2.63
  -5  -9   7   20.37   10.82
  -5  -9   8   -2.91    4.33
  -5  -8  -2   32.77    9.06
  -5  -8  -1   72.10   15.28
  -5  -8   0  238.59   26.70
  -5  -8   1    4.89    2.34
  -5  -8   2    6.56    5.24
  -5  -8   3  326.12   34.26
  -5  -8   4    7.76    5.79
  -5  -8   5  145.78   24.55
  -5  -8   6   47.25   15.34
  -5  -8   7  -16.06    8.99
  -5  -8   8    5.61    5.98
  -5  -8   9    5.82    6.32
  -5  -7  -3   55.81    8.03
  -5  -7  -2  202.94   16.55
  -5  -7  -1  115.43   17.63
  -5  -7   0  347.40   31.17
  -5  -7   1   51.31   12.14
  -5  -7   2  183.29   23.97
  -5  -7   3  407.82   36.95
  -5  -7   4    0.22    5.95
  -5  -7   5   -3.42    6.52
  -5  -7   6   87.62   19.48
  -5  -7   7    0.69    2.89
  -5  -7   8   -2.82    4.28
  -5  -7   9   22.12   10.93
  -5  -7  10    9.36    7.91
  -5  -6  -2    0.58    0.90
  -5  -6  -1   26.34    5.79
  -5  -6  -1   28.51    8.34
  -5  -6   0  132.67   18.21
  -5  -6   0  108.39   12.65
  -5  -6   1  329.29   29.79
  -5  -6   2   13.09    6.47
  -5  -6   3  247.39   27.69
  -5  -6   4    5.63    7.03
  -5  -6   5  223.28   28.66
  -5  -6   6   19.19    9.58
  -5  -6   7    2.62    5.17
  -5  -6   8   24.40   11.13
  -5  -6   9   -1.71    5.09
  -5  -6  10    7.32    6.86
  -5  -5  -2   11.52    2.39
  -5  -5  -1  134.26   10.79
  -5  -5  -1  150.81   18.72
  -5  -5   0    2.28    2.24
  -5  -5   0    1.14    1.20
  -5  -5   1    2.87    4.14
  -5  -5   1    0.32    2.31
  -5  -5   2    2.68    2.25
  -5  -5   3   78.17   15.07
  -5  -5   4   -2.92    2.76
  -5  -5   5   21.30    7.90
  -5  -5   6    8.78    3.38
  -5  -5   7   32.47   11.37
  -5  -5   8   52.85   15.34
  -5  -5   9   62.91   18.51
  -5  -5  10   11.85    6.19
  -5  -5  11    4.87    6.10
  -5  -4  -1    9.85    4.62
  -5  -4  -1    6.62    2.08
  -5  -4   0   -1.46    1.85
  -5  -4   0    3.84    2.00
  -5  -4   1   -1.35    3.17
  -5  -4   1    2.53    1.75
  -5  -4   2  133.90   18.21
  -5  -4   3   32.92    9.84
  -5  -4   4    4.56    4.56
  -5  -4   5   -6.30    6.70
  -5  -4   6    8.53    3.89
  -5  -4   7   21.61    9.26
  -5  -4   8   74.30   17.80
  -5  -4   9   25.40   10.95
  -5  -4  10    0.46    3.24
  -5  -4  11  -15.49    9.69
  -5  -3 -10   -4.49    6.75
  -5  -3  -9   53.80   14.67
  -5  -3  -8   -1.49    5.44
  -5  -3  -7  331.44   32.47
  -5  -3  -6  893.21   49.63
  -5  -3  -5  180.49   20.67
  -5  -3  -4   91.57   13.63
  -5  -3  -3 1268.30   47.35
  -5  -3  -2    5.26    2.82
  -5  -3  -1   79.96    9.15
  -5  -3   0   90.23    8.10
  -5  -3   0  111.30   14.85
  -5  -3   0   92.72    8.06
  -5  -3   1   45.87    9.82
  -5  -3   1   58.52    8.27
  -5  -3   2    3.89    3.21
  -5  -3   2    0.25    1.16
  -5  -3   3   49.56   11.43
  -5  -3   4   33.87    9.27
  -5  -3   5  105.50   18.25
  -5  -3   6    7.50    4.42
  -5  -3   7   -5.39    5.24
  -5  -3   8   -4.94    3.26
  -5  -3   9   85.67   20.08
  -5  -3  10    7.50    6.50
  -5  -3  11   10.55    8.99
  -5  -3  12   10.39    8.50
  -5  -2 -12   24.71   12.25
  -5  -2 -11   40.99   13.65
  -5  -2 -10   43.54   14.53
  -5  -2  -9  118.84   22.78
  -5  -2  -8  243.43   30.26
  -5  -2  -7   14.34    6.57
  -5  -2  -6  240.12   26.51
  -5  -2  -5    9.47    4.89
  -5  -2  -4 1268.26   52.98
  -5  -2  -3   95.71    7.32
  -5  -2  -3   90.48   12.91
  -5  -2  -2  619.28   15.08
  -5  -2  -1    1.17    0.81
  -5  -2   0  510.32   30.44
  -5  -2   1    5.32    3.79
  -5  -2   2  227.32   22.11
  -5  -2   3  599.99   37.50
  -5  -2   4   -0.16    0.80
  -5  -2   4   -1.69    1.74
  -5  -2   5   17.40    7.53
  -5  -2   5   20.47    3.99
  -5  -2   6    9.24    6.86
  -5  -2   7    6.35    4.22
  -5  -2   8   10.85    6.51
  -5  -2   9   14.26    7.83
  -5  -2  10    7.65    3.58
  -5  -2  11  -15.56    9.39
  -5  -2  12   13.85    8.99
  -5  -1 -13   -4.80    6.31
  -5  -1 -12    0.03    8.56
  -5  -1 -11   10.74    7.94
  -5  -1 -10    8.00    6.78
  -5  -1  -9   -5.35    7.39
  -5  -1  -8   -3.71    4.81
  -5  -1  -7    4.58    7.17
  -5  -1  -6  272.39   23.26
  -5  -1  -6  239.05   27.34
  -5  -1  -5  165.89   21.04
  -5  -1  -5  165.19   16.35
  -5  -1  -4   78.63   10.04
  -5  -1  -3   88.98    9.38
  -5  -1  -2    4.62    2.08
  -5  -1  -1 1188.13   29.92
  -5  -1   0   27.65    4.81
  -5  -1   0   33.39    7.42
  -5  -1   1  114.52   14.13
  -5  -1   2   44.02    9.26
  -5  -1   3  504.14   33.10
  -5  -1   4   51.52   11.65
  -5  -1   5  109.18   17.29
  -5  -1   6   27.02    9.33
  -5  -1   6   14.58    4.65
  -5  -1   7   13.37    5.77
  -5  -1   8   37.52   12.38
  -5  -1   9   26.82   11.16
  -5  -1  10   10.53   10.25
  -5  -1  11    7.05    8.38
  -5  -1  12  -14.07    9.24
  -5  -1  13  -13.40    9.43
  -5   0 -13   -1.49    4.52
  -5   0 -12   30.87   14.01
  -5   0 -11   -1.94    4.41
  -5   0 -10    3.82    5.58
  -5   0  -9    9.85    7.10
  -5   0  -8   35.45   11.85
  -5   0  -7   -5.68    7.63
  -5   0  -7   -1.82    4.24
  -5   0  -6   -3.70    4.12
  -5   0  -6    3.61    3.87
  -5   0  -5  103.75   14.27
  -5   0  -4   24.79    6.90
  -5   0  -3   97.99   12.13
  -5   0  -3   97.60   11.85
  -5   0  -2  207.42   15.86
  -5   0  -2  208.87   16.99
  -5   0  -1    7.65    3.48
  -5   0  -1    9.10    3.52
  -5   0  -1    7.59    2.72
  -5   0   0  104.33   10.86
  -5   0   0   97.38   12.05
  -5   0   0   91.49   11.37
  -5   0   1   32.13    7.76
  -5   0   1   31.86    6.48
  -5   0   2  401.71   26.78
  -5   0   3  566.47   33.59
  -5   0   4    1.83    2.75
  -5   0   5   65.31   12.87
  -5   0   6   32.12    9.10
  -5   0   7    4.00    4.84
  -5   0   8    8.40    7.45
  -5   0   9    9.19    6.43
  -5   0  10    7.73    7.36
  -5   0  11   47.01   14.82
  -5   0  12   11.87    8.44
  -5   0  13   -4.37    5.83
  -5   1 -12   16.42    8.71
  -5   1 -11   37.52   16.26
  -5   1 -10    4.38    6.41
  -5   1  -9   46.78   15.28
  -5   1  -8   15.46    8.67
  -5   1  -8    0.63    4.52
  -5   1  -7    7.21    4.27
  -5   1  -7   18.64    9.04
  -5   1  -6   -3.33    5.31
  -5   1  -5    5.53    4.68
  -5   1  -4   37.83    7.28
  -5   1  -4   49.24   10.35
  -5   1  -3   24.19    5.54
  -5   1  -3   17.89    6.09
  -5   1  -2   66.93    9.03
  -5   1  -2   73.62   11.07
  -5   1  -1  310.33   19.26
  -5   1  -1  274.56   19.23
  -5   1  -1  297.70   21.50
  -5   1   0  216.44   16.40
  -5   1   0  219.08   16.64
  -5   1   0  211.59   17.72
  -5   1   1  282.87   19.78
  -5   1   1  288.07   19.94
  -5   1   1  267.20   20.53
  -5   1   2   -6.48    3.42
  -5   1   2    2.09    2.56
  -5   1   3   66.70   10.97
  -5   1   4   -0.95    3.00
  -5   1   5  208.52   22.44
  -5   1   6  260.98   26.37
  -5   1   7   24.52    9.54
  -5   1   8  169.68   24.36
  -5   1   9   -8.71    6.26
  -5   1  10   55.39   15.34
  -5   1  11  -10.07    7.25
  -5   1  12   -4.24    5.48
  -5   1  13   -2.30    4.48
  -5   2 -12    6.43    7.29
  -5   2 -11   31.49   14.34
  -5   2 -10    5.67    6.48
  -5   2  -9  149.40   28.25
  -5   2  -9  169.38   27.33
  -5   2  -8    5.71    7.08
  -5   2  -8   -2.37    5.38
  -5   2  -7    4.99    3.46
  -5   2  -6   69.29   14.72
  -5   2  -5    2.82    3.37
  -5   2  -4  154.50   15.18
  -5   2  -4  175.24   21.04
  -5   2  -3  165.56   13.82
  -5   2  -3  201.16   21.29
  -5   2  -2   -0.70    3.43
  -5   2  -2    3.54    2.12
  -5   2  -1  147.33   17.07
  -5   2  -1  143.55   11.83
  -5   2  -1  143.58   11.89
  -5   2   0   15.36    4.17
  -5   2   0    9.24    3.21
  -5   2   0   13.79    4.70
  -5   2   1   -0.21    0.95
  -5   2   1    2.45    2.28
  -5   2   1   -1.53    1.96
  -5   2   2  110.56   12.32
  -5   2   2  106.71   12.23
  -5   2   2   99.37   14.35
  -5   2   3  210.33   21.47
  -5   2   3  181.08   16.94
  -5   2   4   -2.78    3.26
  -5   2   5   16.11    6.69
  -5   2   6  155.65   20.26
  -5   2   7   14.98    7.66
  -5   2   8    4.75    4.49
  -5   2   9  101.12   19.50
  -5   2  10    4.60    6.16
  -5   2  11   59.47   17.09
  -5   2  12   20.59   12.79
  -5   2  13    9.71    7.88
  -5   2  14    8.42    7.77
  -5   3 -11   27.17   14.78
  -5   3 -10    5.46    5.68
  -5   3  -9   -1.67    3.66
  -5   3  -9   -4.08    5.64
  -5   3  -8   33.51   12.74
  -5   3  -7   25.51   10.79
  -5   3  -6  473.21   41.75
  -5   3  -5    1.65    3.03
  -5   3  -4   61.70   13.53
  -5   3  -3   25.88    5.09
  -5   3  -3   26.22    9.07
  -5   3  -2    3.59    3.20
  -5   3  -2    5.39    2.35
  -5   3  -1  198.32   11.31
  -5   3  -1  207.82   22.24
  -5   3  -1  193.86   11.45
  -5   3   0  114.18    9.46
  -5   3   0  131.34   17.29
  -5   3   0  126.79    9.43
  -5   3   1   12.13    3.00
  -5   3   1   18.06    4.25
  -5   3   1    8.70    4.08
  -5   3   2    5.61    3.68
  -5   3   2    7.70    2.85
  -5   3   2    3.64    1.99
  -5   3   3   49.55   10.84
  -5   3   3   42.92    7.81
  -5   3   4   15.67    5.26
  -5   3   4   15.55    6.64
  -5   3   5  288.83   24.55
  -5   3   6  187.00   21.07
  -5   3   7   30.27    8.81
  -5   3   8   43.29   11.97
  -5   3   9    2.14    3.11
  -5   3  10   33.98   12.67
  -5   3  11    4.54    5.90
  -5   3  12    1.77    6.11
  -5   3  13   -5.46    6.09
  -5   3  14   21.54   13.12
  -5   4 -10   -5.53    6.34
  -5   4 -10    4.30    6.09
  -5   4  -9   -4.06    5.70
  -5   4  -9    7.55    5.70
  -5   4  -8    5.26    5.68
  -5   4  -7    9.02    6.77
  -5   4  -6   26.85   10.74
  -5   4  -5   79.10   17.88
  -5   4  -4    7.87    4.98
  -5   4  -3  522.52   40.78
  -5   4  -2    1.20    3.24
  -5   4  -1  158.57   21.64
  -5   4   0    7.61    6.52
  -5   4   1    1.08    3.05
  -5   4   1    7.11    2.17
  -5   4   1    7.12    1.80
  -5   4   2  129.06   10.32
  -5   4   2  105.87   10.38
  -5   4   2  132.30   19.12
  -5   4   3   34.89    6.35
  -5   4   3   39.04   10.87
  -5   4   4    0.60    1.78
  -5   4   4    1.17    1.78
  -5   4   5   14.88    5.32
  -5   4   5   20.61    8.52
  -5   4   6    3.83    3.99
  -5   4   7    5.46    5.11
  -5   4   8   66.45   14.57
  -5   4   9   24.65   10.08
  -5   4  10   10.94    8.16
  -5   4  11   -9.08    6.64
  -5   4  12   11.33    6.98
  -5   4  13   -7.34    6.82
  -5   4  14   -0.42    3.12
  -5   4  14    1.52    9.16
  -5   5 -10   -2.46    4.72
  -5   5  -9    0.27    2.85
  -5   5  -9   15.87   10.52
  -5   5  -8   11.10    9.22
  -5   5  -7    7.95    6.72
  -5   5  -6   17.20    8.67
  -5   5  -5   10.54    8.10
  -5   5  -4   21.84   10.51
  -5   5  -3   24.06    9.12
  -5   5  -2   13.04    8.35
  -5   5  -1    0.47    2.76
  -5   5   0  357.65   33.93
  -5   5   1    4.33    4.68
  -5   5   2  100.47    8.62
  -5   5   2  127.03   19.99
  -5   5   3    4.65    1.94
  -5   5   3    5.21    3.62
  -5   5   4    7.81    3.80
  -5   5   4   10.44    6.25
  -5   5   5  187.46   17.99
  -5   5   5  212.56   26.65
  -5   5   6   63.88   15.54
  -5   5   6   31.66    7.60
  -5   5   7    5.11    4.73
  -5   5   7   -3.51    6.02
  -5   5   8    9.76    5.03
  -5   5   9    6.72    6.00
  -5   5  10    3.68    5.31
  -5   5  11   15.59    7.97
  -5   5  12    6.47    5.97
  -5   5  13   15.03    9.72
  -5   5  13    8.27    7.48
  -5   5  14  -12.05    8.74
  -5   5  14  -11.32    9.00
  -5   6  -8   -6.47    6.94
  -5   6  -7    8.43    7.25
  -5   6  -6   16.27    9.55
  -5   6  -5   17.23   10.76
  -5   6  -4   -6.46    7.38
  -5   6  -3   17.34    9.31
  -5   6  -2   16.26    8.69
  -5   6  -1   31.97   10.65
  -5   6   0   43.89   12.86
  -5   6   1    5.46    4.21
  -5   6   2   11.07    5.31
  -5   6   3  143.81   23.74
  -5   6   4    2.57    2.21
  -5   6   4   -1.82    4.03
  -5   6   5  226.63   28.78
  -5   6   5  180.38   18.88
  -5   6   6   11.56    5.71
  -5   6   6   11.59    5.33
  -5   6   7   51.44   11.75
  -5   6   7   36.49   12.62
  -5   6   7   36.94    9.13
  -5   6   8  144.38   20.14
  -5   6   8  144.56   21.71
  -5   6   8  143.14   25.06
  -5   6   9   28.85   11.69
  -5   6   9   22.97    9.33
  -5   6  10   14.58    8.24
  -5   6  10    4.24    4.33
  -5   6  11    4.74    5.15
  -5   6  11    3.08    4.03
  -5   6  12   -5.55    5.92
  -5   6  13   -2.52    4.67
  -5   6  14    3.12    5.45
  -5   7  -7    0.99    5.04
  -5   7  -6   10.00    8.10
  -5   7  -5   -4.87    5.68
  -5   7  -4   43.74   15.46
  -5   7  -3   15.73    8.49
  -5   7  -2    7.59    7.70
  -5   7  -1   37.54   12.54
  -5   7   0   26.29   11.04
  -5   7   1   28.88   12.15
  -5   7   2  -13.22    7.61
  -5   7   3  153.30   24.32
  -5   7   4    2.43    3.78
  -5   7   5   22.33    9.77
  -5   7   6   11.92    7.93
  -5   7   7   46.21   14.59
  -5   7   7   40.04   11.07
  -5   7   8  127.28   24.55
  -5   7   8  103.10   17.77
  -5   7   9    8.07    2.88
  -5   7   9   10.28    5.59
  -5   7  10    0.98    2.97
  -5   7  10   -3.92    4.90
  -5   7  11   21.11   10.01
  -5   7  12   -9.17    7.16
  -5   7  13    3.23    3.24
  -5   7  14  -10.42    8.37
  -5   8  -5    0.55    3.12
  -5   8  -4    0.59    3.50
  -5   8  -3   38.99   15.02
  -5   8  -2   16.60    8.64
  -5   8  -1  139.20   25.78
  -5   8   0   -3.62    4.70
  -5   8   1    3.54    5.42
  -5   8   2   11.90    8.73
  -5   8   3   14.81    8.45
  -5   8   4    5.69    2.93
  -5   8   5    0.70    5.45
  -5   8   6    1.93    3.51
  -5   8   7    0.99    3.07
  -5   8   8   22.84   11.03
  -5   8   9   -0.73    2.89
  -5   8  10    9.21    7.33
  -5   8  11    1.89    4.07
  -5   8  11   15.60    9.06
  -5   8  12   -2.31    4.40
  -5   8  12    4.63    5.23
  -5   8  13  -13.98    8.93
  -5   8  14    9.34    7.71
  -5   9  -4   21.73   15.18
  -5   9  -3  137.00   29.65
  -5   9  -2   -1.98    4.50
  -5   9  -1   12.99   10.09
  -5   9   0   -3.61    4.95
  -5   9   1   17.23    9.52
  -5   9   2   29.39   13.17
  -5   9   3    2.39    4.16
  -5   9   4   -5.95    5.89
  -5   9   5   -6.56    6.12
  -5   9   6   -1.79    3.55
  -5   9   7    5.74    5.53
  -5   9   8   -0.72    2.95
  -5   9   9    0.02    5.07
  -5   9  10   -6.61    6.58
  -5   9  11   22.18   11.74
  -5  10  -1   14.38    9.87
  -5  10   0   28.91   13.65
  -5  10   1    5.96    5.23
  -5  10   2   22.10   11.35
  -5  10   3    7.63    6.99
  -5  10   4   -5.58    6.10
  -5  10   5    9.34    9.03
  -5  10   6   -0.60    2.58
  -5  10   7    6.14    6.08
  -5  10   8  -11.36    8.14
  -5  10   9   -2.00    3.90
  -5  10  10   -8.36    7.39
  -5  11   2   17.42   10.71
  -5  11   3   28.61   14.26
  -5  11   4    3.07    9.44
  -5  11   5   12.81    9.16
  -5  11   6    6.67    6.87
  -5  11   7    9.42    5.87
  -5  11   8    4.39    5.74
  -4 -14  -5    2.53    3.88
  -4 -14  -4   19.20    8.69
  -4 -13  -5    0.95    2.29
  -4 -13  -4   12.45    6.81
  -4 -13  -3   85.51   17.06
  -4 -13  -2    8.79    5.76
  -4 -13  -1   35.49   11.56
  -4 -13   0    3.57    3.95
  -4 -12  -4    6.95    4.76
  -4 -12  -3  183.23   24.31
  -4 -12  -2   -2.00    4.16
  -4 -12  -1    4.93    4.28
  -4 -12   0   13.65    6.89
  -4 -12   1    5.26    5.85
  -4 -12   2   10.06    5.53
  -4 -12   3    0.02    1.96
  -4 -11  -3   35.55    9.75
  -4 -11  -2   41.87   11.25
  -4 -11  -1   21.79    7.83
  -4 -11   0   30.31   10.30
  -4 -11   1   -2.89    3.50
  -4 -11   2   17.02    8.32
  -4 -11   3    9.95    5.85
  -4 -11   4    3.19    3.98
  -4 -11   5   65.02   17.52
  -4 -11   6    6.30    9.57
  -4 -10  -3   37.12   10.52
  -4 -10  -2   81.37   15.09
  -4 -10  -1    5.97    5.78
  -4 -10   0    3.96    4.52
  -4 -10   1   14.91    6.83
  -4 -10   2    6.53    4.91
  -4 -10   3   94.02   18.80
  -4 -10   4    2.42    6.16
  -4 -10   5   79.29   18.68
  -4 -10   6   19.37   10.44
  -4 -10   7    8.40    5.61
  -4 -10   8   10.57    7.82
  -4  -9  -2   11.68    5.02
  -4  -9  -1  173.59   21.61
  -4  -9   0   29.91    9.27
  -4  -9   1   38.72   10.82
  -4  -9   2    1.57    1.87
  -4  -9   3   98.48   18.44
  -4  -9   4    1.26    6.20
  -4  -9   5   24.36    9.86
  -4  -9   6    9.17    2.90
  -4  -9   7    3.41    4.46
  -4  -9   8   18.31   10.30
  -4  -9   9   -4.82    5.91
  -4  -8  -2   67.07   12.47
  -4  -8  -1  471.18   34.36
  -4  -8   0   69.99   13.49
  -4  -8   1   10.16    3.84
  -4  -8   2    3.97    4.94
  -4  -8   3  142.34   21.19
  -4  -8   4    0.22    3.44
  -4  -8   5   10.82    6.75
  -4  -8   6    2.98    2.25
  -4  -8   7    4.05    4.25
  -4  -8   8    8.41    5.57
  -4  -8   9    6.49    6.40
  -4  -8  10  -11.71    8.70
  -4  -7  -3  158.26   15.31
  -4  -7  -1  323.00   27.77
  -4  -7   0   97.17   15.51
  -4  -7   1    0.11    2.22
  -4  -7   2  156.22   21.07
  -4  -7   3  100.07   17.44
  -4  -7   4  197.37   25.51
  -4  -7   5   21.61    8.26
  -4  -7   6    0.02    3.52
  -4  -7   7    7.85    5.89
  -4  -7   8   13.11    7.19
  -4  -7   9   16.15    9.37
  -4  -7  10   -5.98    6.48
  -4  -6  -3  181.80   14.01
  -4  -6  -2    5.81    2.62
  -4  -6  -1  371.45   28.52
  -4  -6  -1  349.42   22.40
  -4  -6   0   17.63    6.08
  -4  -6   1   63.76   12.21
  -4  -6   2  255.97   25.76
  -4  -6   3   44.40   11.32
  -4  -6   4    1.98    3.81
  -4  -6   5  138.04   21.77
  -4  -6   6    0.03    3.52
  -4  -6   7   72.21   17.13
  -4  -6   8   47.10   14.97
  -4  -6   9    2.92    4.85
  -4  -6  10   -7.58    6.89
  -4  -6  11    1.70    3.98
  -4  -5  -2   89.31    8.33
  -4  -5  -1   38.12    8.71
  -4  -5  -1   40.17    6.44
  -4  -5   0   24.81    7.62
  -4  -5   0   23.69    5.56
  -4  -5   1   -0.39    2.87
  -4  -5   2  595.99   37.89
  -4  -5   3  222.35   24.05
  -4  -5   4   26.49    8.72
  -4  -5   5  143.43   21.28
  -4  -5   6  102.87   19.21
  -4  -5   7    9.52    6.34
  -4  -5   8  133.07   24.31
  -4  -5   9   39.10   14.35
  -4  -5  10    9.14    8.71
  -4  -5  11   33.03   16.03
  -4  -4  -1  596.66   19.57
  -4  -4   0  144.03   16.14
  -4  -4   0  139.21   11.63
  -4  -4   1    7.56    4.41
  -4  -4   1    6.01    2.18
  -4  -4   2  134.66   17.24
  -4  -4   3   55.06   11.76
  -4  -4   4   59.43   12.52
  -4  -4   5  361.82   33.03
  -4  -4   6  320.19   32.54
  -4  -4   7   11.93    7.00
  -4  -4   8  151.99   25.18
  -4  -4   9   24.42   12.23
  -4  -4  10   21.21   11.28
  -4  -4  11    7.60    5.42
  -4  -4  12  -14.01    9.59
  -4  -3  -8   80.69   16.50
  -4  -3  -7  119.73   18.65
  -4  -3  -6  444.14   33.57
  -4  -3  -5  112.60   15.51
  -4  -3  -4   -0.39    1.71
  -4  -3  -3  666.75   31.03
  -4  -3  -2   -0.50    1.29
  -4  -3  -1  228.82    8.13
  -4  -3   0    1.28    2.04
  -4  -3   0   -0.09    0.75
  -4  -3   1  237.35   16.50
  -4  -3   1  249.96   21.27
  -4  -3   2  847.43   41.42
  -4  -3   2  819.64   34.72
  -4  -3   3   64.19   11.91
  -4  -3   4   -0.30    3.66
  -4  -3   5   46.27   10.98
  -4  -3   6   14.25    5.40
  -4  -3   7   72.34   15.61
  -4  -3   8   91.67   19.42
  -4  -3   9   40.65   14.82
  -4  -3  10   14.02    8.66
  -4  -3  11   18.24   12.23
  -4  -3  12   -3.66    5.35
  -4  -2 -11   26.47   12.13
  -4  -2 -10    9.64    8.64
  -4  -2  -9  104.55   20.15
  -4  -2  -8  245.06   29.14
  -4  -2  -7  597.28   42.37
  -4  -2  -6  183.93   21.85
  -4  -2  -5   67.89   12.25
  -4  -2  -4   76.80   12.07
  -4  -2  -3  293.94   21.11
  -4  -2  -3  258.85   20.55
  -4  -2  -2  232.70   17.02
  -4  -2  -2  246.19   18.76
  -4  -2  -1  111.61   12.23
  -4  -2   0  236.08   19.03
  -4  -2   0  244.09   18.67
  -4  -2   1  193.04   17.85
  -4  -2   2   78.84   11.86
  -4  -2   3    6.92    3.68
  -4  -2   3    3.08    1.39
  -4  -2   4  231.04   11.85
  -4  -2   4  253.97   23.99
  -4  -2   5   26.40    7.88
  -4  -2   6    7.99    6.44
  -4  -2   7    7.35    7.17
  -4  -2   8   24.42    9.51
  -4  -2   9   21.28    9.92
  -4  -2  10  118.13   23.66
  -4  -2  11    2.76    5.57
  -4  -2  12   11.98    8.34
  -4  -2  13   -0.63    3.84
  -4  -1 -12   40.09   14.18
  -4  -1 -11    4.74    5.19
  -4  -1 -10    0.17    3.72
  -4  -1  -9  146.85   24.43
  -4  -1  -8    5.77    6.22
  -4  -1  -7   79.61   15.42
  -4  -1  -6   75.37   14.50
  -4  -1  -5   59.30    9.56
  -4  -1  -5   54.92   11.45
  -4  -1  -4  972.88   38.65
  -4  -1  -4  964.42   34.13
  -4  -1  -4  963.67   45.15
  -4  -1  -3  706.05   24.94
  -4  -1  -3  727.15   31.86
  -4  -1  -2   34.70    4.71
  -4  -1  -2   42.84    7.42
  -4  -1  -1 1769.28   47.80
  -4  -1  -1 1672.16   29.96
  -4  -1   0   16.20    4.58
  -4  -1   0   19.05    5.05
  -4  -1   1   36.70    7.03
  -4  -1   1   27.55    6.59
  -4  -1   2   25.07    6.97
  -4  -1   3  145.70   16.24
  -4  -1   4   -3.38    4.16
  -4  -1   5  111.15   16.08
  -4  -1   5  108.90   10.79
  -4  -1   6   -0.13    2.31
  -4  -1   6    1.78    2.25
  -4  -1   7   68.88   10.71
  -4  -1   7   87.87   16.75
  -4  -1   8   47.76   13.49
  -4  -1   9   37.90   13.17
  -4  -1  10   70.72   16.69
  -4  -1  11   16.11    9.06
  -4  -1  12  -15.38    9.40
  -4  -1  13   -1.04    3.86
  -4   0 -13   21.78   11.85
  -4   0 -12   -6.41    6.52
  -4   0 -11   16.38    9.17
  -4   0 -10   81.59   19.18
  -4   0  -9  208.11   29.74
  -4   0  -8   12.52    6.03
  -4   0  -7   17.09    6.98
  -4   0  -7   22.75    8.71
  -4   0  -6   -0.25    3.23
  -4   0  -6   -4.79    6.69
  -4   0  -5  122.52   15.24
  -4   0  -4  386.87   24.56
  -4   0  -4  344.91   21.99
  -4   0  -3 1083.41   36.80
  -4   0  -3 1117.53   37.70
  -4   0  -2   22.06    5.21
  -4   0  -2   24.47    5.21
  -4   0  -1 1986.76   46.99
  -4   0  -1 1959.91   42.75
  -4   0   0  667.49   27.43
  -4   0   0  626.78   23.95
  -4   0   0  631.86   27.33
  -4   0   1   60.46    8.64
  -4   0   1   66.79    9.21
  -4   0   2   89.98   11.49
  -4   0   3    8.66    4.29
  -4   0   4  164.90   17.85
  -4   0   5    1.30    2.00
  -4   0   6    2.32    4.04
  -4   0   7    3.12    3.40
  -4   0   8  164.07   24.15
  -4   0   9   -0.03    2.99
  -4   0  10   74.35   18.04
  -4   0  11   18.32    9.41
  -4   0  12   -3.93    3.18
  -4   0  13   10.79    7.94
  -4   1 -13   40.22   17.56
  -4   1 -12   -5.02    6.24
  -4   1 -11    0.24    7.64
  -4   1 -10   44.91   16.28
  -4   1  -9    6.45    4.80
  -4   1  -8  194.94   26.39
  -4   1  -8  172.78   26.84
  -4   1  -7  171.23   25.08
  -4   1  -7  229.92   26.80
  -4   1  -6  127.68   18.59
  -4   1  -5   43.65   10.39
  -4   1  -4   13.15    4.45
  -4   1  -4   -0.46    2.36
  -4   1  -4    9.25    3.89
  -4   1  -3   61.82   10.45
  -4   1  -3   58.11    7.91
  -4   1  -2   94.23    9.52
  -4   1  -2  101.68   11.98
  -4   1  -1 1090.09   31.61
  -4   1  -1 1132.83   38.44
  -4   1   0  391.58   19.71
  -4   1   0  441.38   20.74
  -4   1   0  387.96   21.91
  -4   1   1   49.26    7.35
  -4   1   1   62.36    8.93
  -4   1   1   54.96    7.78
  -4   1   2  601.08   27.59
  -4   1   3   19.85    5.01
  -4   1   4  118.53   14.65
  -4   1   5  167.75   18.79
  -4   1   6   66.24   12.93
  -4   1   7   17.43    7.91
  -4   1   8  113.49   19.36
  -4   1   9   -5.73    6.65
  -4   1  10    0.94    4.05
  -4   1  11    5.36    3.02
  -4   1  12   16.94    9.96
  -4   1  13   -3.18    4.97
  -4   1  14  -13.39    9.50
  -4   2 -13    6.88    7.57
  -4   2 -12    2.87    5.16
  -4   2 -11    1.87    6.24
  -4   2 -10   58.02   17.96
  -4   2  -9   17.23    8.92
  -4   2  -9   24.84   11.26
  -4   2  -8    1.24    3.94
  -4   2  -8    2.20    7.33
  -4   2  -7   45.53   12.86
  -4   2  -6    7.39    5.57
  -4   2  -5  333.64   30.43
  -4   2  -4   34.71    6.61
  -4   2  -4   35.60   10.14
  -4   2  -3  458.42   22.46
  -4   2  -3  516.40   32.86
  -4   2  -2    3.42    1.93
  -4   2  -2    0.90    2.45
  -4   2  -1    1.66    0.74
  -4   2  -1    1.48    2.27
  -4   2   0   87.01    8.04
  -4   2   0   85.23    8.12
  -4   2   0   88.58   12.19
  -4   2   1   75.16    8.37
  -4   2   1   66.36    7.61
  -4   2   1   81.04   11.39
  -4   2   2  229.66   15.78
  -4   2   2  233.11   20.03
  -4   2   3  179.66   15.69
  -4   2   4    7.91    4.55
  -4   2   5  165.81   18.06
  -4   2   6  318.43   27.47
  -4   2   7   44.41   11.70
  -4   2   8   69.34   15.10
  -4   2   9   11.81    6.83
  -4   2  10    5.00    4.59
  -4   2  11   13.62    9.16
  -4   2  12    9.63    9.44
  -4   2  13    3.09    3.45
  -4   2  14   -0.43    3.49
  -4   3 -12   -2.35    3.69
  -4   3 -11   18.63   12.55
  -4   3 -10   52.65   18.08
  -4   3  -9   19.05    9.29
  -4   3  -9   13.64    8.76
  -4   3  -8   -2.24    6.42
  -4   3  -8    0.02    3.63
  -4   3  -7  100.46   19.85
  -4   3  -6   10.06    5.56
  -4   3  -5   28.58    9.68
  -4   3  -4    2.59    2.44
  -4   3  -4   -3.05    4.57
  -4   3  -3   30.01    5.03
  -4   3  -3   30.00    9.21
  -4   3  -2  580.64   19.42
  -4   3  -2  642.72   38.08
  -4   3  -1   19.29    3.52
  -4   3  -1   33.93    4.26
  -4   3  -1   37.97    9.33
  -4   3  -1   33.12    3.51
  -4   3   0  118.75    7.43
  -4   3   0  108.52    7.57
  -4   3   1   12.63    4.96
  -4   3   1   10.68    2.82
  -4   3   1   10.26    2.48
  -4   3   2   88.02    8.70
  -4   3   2   80.88   13.34
  -4   3   3  145.93   17.77
  -4   3   3  151.71   13.45
  -4   3   4    5.52    3.50
  -4   3   5   77.82   12.01
  -4   3   6  148.24   18.05
  -4   3   7    3.03    2.43
  -4   3   8   80.45   15.91
  -4   3   9   12.44    6.70
  -4   3  10   57.98   16.06
  -4   3  11    9.08    3.36
  -4   3  12   -2.82    4.58
  -4   3  13   18.28   10.78
  -4   3  14   23.36   12.29
  -4   4 -11   -9.12    8.02
  -4   4 -10    0.85    3.29
  -4   4 -10   -2.16    4.85
  -4   4  -9   24.48   12.05
  -4   4  -9   29.91   12.85
  -4   4  -8   -1.06    7.12
  -4   4  -7   31.87   13.17
  -4   4  -6    5.05    4.17
  -4   4  -5    5.97    4.81
  -4   4  -4  158.79   23.06
  -4   4  -3    6.17    4.35
  -4   4  -3   13.88    3.21
  -4   4  -2   -0.71    0.53
  -4   4  -2    3.27    4.21
  -4   4  -1   93.84   15.93
  -4   4   0   -2.21    4.86
  -4   4   1  276.99   11.44
  -4   4   1  616.85   37.85
  -4   4   2  163.13   10.20
  -4   4   2  160.19   19.19
  -4   4   3   61.20    7.78
  -4   4   3   88.32   14.55
  -4   4   4   36.58    9.84
  -4   4   4   29.79    6.23
  -4   4   5   81.95   12.14
  -4   4   6   -5.03    4.65
  -4   4   7   40.64    9.60
  -4   4   8  126.21   19.10
  -4   4   9    6.50    4.74
  -4   4  10    6.45    5.22
  -4   4  11   24.66    9.47
  -4   4  12   14.49    8.50
  -4   4  13   25.96   11.72
  -4   4  14    8.58    9.37
  -4   4  14    7.43    7.52
  -4   5 -10    2.79    4.87
  -4   5 -10  -13.00    9.50
  -4   5  -9  -15.07    9.89
  -4   5  -9    0.08    2.82
  -4   5  -8   -4.83    5.71
  -4   5  -7   -4.02    5.02
  -4   5  -6   47.09   15.09
  -4   5  -5    3.10    4.21
  -4   5  -4   -0.37    3.73
  -4   5  -3  161.90   23.66
  -4   5  -2   59.23   14.65
  -4   5  -1  609.87   43.14
  -4   5   0    5.89    5.67
  -4   5   1  130.26   19.21
  -4   5   2   26.35    3.97
  -4   5   2   19.01    6.50
  -4   5   2   10.75    2.34
  -4   5   3    2.85    2.12
  -4   5   3   -0.24    1.86
  -4   5   4   83.93   10.09
  -4   5   4   86.80   16.18
  -4   5   5   53.61    9.13
  -4   5   5   66.11   14.34
  -4   5   6   16.70    6.97
  -4   5   6   33.25    8.26
  -4   5   7   20.46    7.86
  -4   5   8  132.83   19.26
  -4   5   9    7.17    5.66
  -4   5  10   30.91   10.47
  -4   5  11   13.77    8.45
  -4   5  12   -8.43    7.01
  -4   5  12   17.21    9.39
  -4   5  13    7.56    4.15
  -4   5  13   35.54   13.50
  -4   5  14  -10.99    8.57
  -4   6  -9    8.24    7.66
  -4   6  -9   -4.05    5.76
  -4   6  -8   -3.35    5.12
  -4   6  -7   22.30   11.15
  -4   6  -6   17.22    9.57
  -4   6  -5    4.20    3.86
  -4   6  -4   30.43   11.24
  -4   6  -3   77.82   17.53
  -4   6  -2   -2.98    4.60
  -4   6  -1   24.36    9.96
  -4   6   0   56.31   14.02
  -4   6   1   74.42   15.90
  -4   6   2  334.75   32.39
  -4   6   3   16.95    3.86
  -4   6   3   20.96    8.44
  -4   6   4   13.05    6.73
  -4   6   4   14.83    4.97
  -4   6   5    3.26    1.74
  -4   6   5   12.27    6.92
  -4   6   6    8.31    4.31
  -4   6   6    7.56    4.57
  -4   6   7  154.04   20.45
  -4   6   7  181.76   26.28
  -4   6   8   64.46   14.17
  -4   6   9    3.51    2.81
  -4   6  10   -4.74    5.02
  -4   6  11    8.63    5.29
  -4   6  12    5.59    6.25
  -4   6  13   -1.88    4.13
  -4   6  14   23.45   13.18
  -4   7  -8   -3.66    5.83
  -4   7  -7   30.13   13.71
  -4   7  -6   -4.74    5.77
  -4   7  -5   15.71    8.88
  -4   7  -4    1.62    3.72
  -4   7  -3  108.95   22.24
  -4   7  -2   28.85   10.38
  -4   7  -1   51.94   15.17
  -4   7   0   25.00   10.96
  -4   7   1    7.45    6.55
  -4   7   2   27.51   10.58
  -4   7   3   28.95   10.29
  -4   7   4    6.03    2.39
  -4   7   4   12.86    7.22
  -4   7   5  135.26   22.76
  -4   7   5   90.81   12.11
  -4   7   6   47.54    9.61
  -4   7   6   33.68   12.29
  -4   7   7   46.64   14.35
  -4   7   7   22.27    7.30
  -4   7   8   45.69   14.18
  -4   7   8   30.91   10.60
  -4   7   9   25.03   10.77
  -4   7   9   22.84    9.15
  -4   7  10   -1.98    3.62
  -4   7  11    8.96    7.99
  -4   7  12   10.28    9.14
  -4   7  13   -0.02    2.73
  -4   7  14    0.03    6.77
  -4   8  -6    0.06    2.84
  -4   8  -5    2.16    6.15
  -4   8  -4   62.77   18.64
  -4   8  -3   14.38    8.89
  -4   8  -2    5.08    5.12
  -4   8  -1   13.25    8.82
  -4   8   0   -4.56    3.56
  -4   8   1   20.65   11.21
  -4   8   2   23.12   10.13
  -4   8   3    7.08    3.86
  -4   8   4   30.19   11.20
  -4   8   5    5.34    5.11
  -4   8   6    4.96    3.47
  -4   8   7   29.34    8.00
  -4   8   7   19.61    9.85
  -4   8   8   35.31    9.92
  -4   8   8   43.67   14.81
  -4   8   9   29.71    9.77
  -4   8   9   25.13   12.02
  -4   8  10   17.10    8.17
  -4   8  10    5.22    5.52
  -4   8  11   13.75    8.94
  -4   8  11    1.93    3.77
  -4   8  12   16.25    8.93
  -4   8  13   10.37   10.19
  -4   8  14   16.14   11.44
  -4   9  -5   18.50   11.17
  -4   9  -4   19.01   13.74
  -4   9  -3    4.68    6.05
  -4   9  -2  -19.38   10.50
  -4   9  -1   42.72   15.03
  -4   9   0    6.41    2.96
  -4   9   1    8.11    7.10
  -4   9   2    7.33    7.68
  -4   9   3    0.35    6.76
  -4   9   4    9.51    7.60
  -4   9   5   30.63   11.35
  -4   9   6    0.82    2.81
  -4   9   7    2.68    4.01
  -4   9   8   17.04    9.34
  -4   9   9   -5.92    5.89
  -4   9  10   13.64    8.68
  -4   9  11   18.33    9.78
  -4   9  11   16.71    9.93
  -4   9  12   23.14   10.55
  -4   9  12   -2.43    4.22
  -4   9  13    6.39    8.32
  -4   9  13   -5.14    6.00
  -4   9  14   18.84   10.53
  -4  10  -3   16.53   11.89
  -4  10  -2   32.47   14.38
  -4  10  -1   48.91   16.94
  -4  10   0   26.40   12.64
  -4  10   1   -6.62    6.42
  -4  10   2   57.93   17.81
  -4  10   3    0.76    3.27
  -4  10   4   36.98   13.72
  -4  10   5   -0.25    5.95
  -4  10   6   -1.20    3.97
  -4  10   7   32.13   13.34
  -4  10   8    0.85    2.60
  -4  10   9    4.28    8.22
  -4  10  10   17.28    8.64
  -4  10  11   -3.30    4.85
  -4  10  12    8.46    7.52
  -4  11   0   24.36   14.30
  -4  11   1    2.44    3.52
  -4  11   2   89.75   23.99
  -4  11   3   13.89    9.14
  -4  11   4    3.96    5.35
  -4  11   5   12.41    6.58
  -4  11   6   -7.33    6.94
  -4  11   7   -6.61    6.70
  -4  11   8   12.96    8.67
  -4  11   9   28.65   14.36
  -4  11  10   24.77   13.06
  -4  12   3   22.48   12.20
  -4  12   4   14.37    9.38
  -4  12   5   22.85   12.36
  -4  12   6    2.61    5.17
  -4  12   7   -4.59    6.03
  -3 -13  -5    0.31    1.68
  -3 -13  -4   19.45    8.19
  -3 -13  -3   30.06    9.64
  -3 -12  -4   40.14   10.65
  -3 -12  -3   42.14   10.88
  -3 -12  -2   16.39    6.90
  -3 -12  -1   13.06    6.34
  -3 -12   0    1.33    2.49
  -3 -11  -3   54.75   12.26
  -3 -11  -2    0.46    2.09
  -3 -11  -1   90.18   15.66
  -3 -11   0   42.25   11.07
  -3 -11   1   53.42   12.93
  -3 -11   2   36.20   10.51
  -3 -11   3   -0.12    1.84
  -3 -11   4   21.22    9.37
  -3 -10  -3   11.33    5.22
  -3 -10  -2    8.73    4.13
  -3 -10  -1  146.25   19.60
  -3 -10   0   48.93   11.58
  -3 -10   1   -6.51    4.47
  -3 -10   2   85.61   16.41
  -3 -10   3   15.50    7.05
  -3 -10   4    6.57    4.14
  -3 -10   5   12.73    7.29
  -3 -10   6   -4.27    4.63
  -3  -9  -2  198.55   22.17
  -3  -9  -1   78.05   13.97
  -3  -9   0   26.03    7.81
  -3  -9   1    6.91    4.35
  -3  -9   2   18.96    7.82
  -3  -9   3   68.43   14.15
  -3  -9   4    9.23    4.27
  -3  -9   5    4.20    4.31
  -3  -9   6    9.38    6.00
  -3  -9   7   -7.43    5.94
  -3  -9   8    6.03    8.61
  -3  -9   9    7.76    6.82
  -3  -8  -2   77.03   12.98
  -3  -8  -1   88.70   14.20
  -3  -8   0    6.63    4.16
  -3  -8   1   57.98   11.73
  -3  -8   2   25.80    8.44
  -3  -8   3    3.26    3.28
  -3  -8   4    3.38    3.86
  -3  -8   5    2.41    4.64
  -3  -8   6    5.43    6.28
  -3  -8   7    0.99    2.44
  -3  -8   8   17.91    8.26
  -3  -8   9    0.07    2.49
  -3  -8  10   10.29    8.00
  -3  -7  -1  100.52   14.40
  -3  -7   0   10.61    5.30
  -3  -7   1   42.76    9.48
  -3  -7   2  103.36   16.06
  -3  -7   3   15.10    7.11
  -3  -7   4  473.91   37.25
  -3  -7   5    1.33    5.11
  -3  -7   6    0.70    3.18
  -3  -7   7   21.88    9.56
  -3  -7   8    9.77    5.70
  -3  -7   9    6.82    6.91
  -3  -7  10   15.53    9.38
  -3  -7  11   -0.58    3.18
  -3  -6  -3   47.93    7.87
  -3  -6  -2  111.61   12.66
  -3  -6  -1 1255.28   48.51
  -3  -6   0   82.47   12.54
  -3  -6   1    6.38    4.09
  -3  -6   2  764.23   42.07
  -3  -6   3   37.31   10.05
  -3  -6   4   90.64   15.88
  -3  -6   5   91.92   16.85
  -3  -6   6   22.40    9.30
  -3  -6   7   55.11   14.81
  -3  -6   8   36.08   13.81
  -3  -6   9   -4.29    5.15
  -3  -6  10   15.71    8.70
  -3  -6  11    0.28    2.83
  -3  -5  -2    4.82    2.28
  -3  -5  -1  197.28   15.12
  -3  -5   0  181.37   17.63
  -3  -5   0  166.99   15.40
  -3  -5   1  265.64   22.30
  -3  -5   2 1607.27   58.09
  -3  -5   3   25.88    8.28
  -3  -5   4   87.30   14.45
  -3  -5   5   74.24   14.54
  -3  -5   6   48.83   12.42
  -3  -5   7    7.00    6.19
  -3  -5   8   94.60   19.88
  -3  -5   9    2.26    4.49
  -3  -5  10   13.39    7.75
  -3  -5  11    2.13    4.34
  -3  -5  12   -8.19    7.50
  -3  -4 -10   16.69    4.78
  -3  -4  -9   77.47   10.52
  -3  -4  -8    2.69    2.23
  -3  -4  -3   19.56    5.36
  -3  -4  -2  510.36   27.39
  -3  -4  -2  471.46   17.27
  -3  -4  -1   11.13    2.95
  -3  -4  -1    8.18    3.60
  -3  -4   0  391.06   20.06
  -3  -4   0  406.29   25.23
  -3  -4   1  133.81   15.24
  -3  -4   1  132.84   13.43
  -3  -4   2  982.54   43.53
  -3  -4   3   11.07    4.67
  -3  -4   4   31.49    6.96
  -3  -4   4   30.97    7.95
  -3  -4   5   27.03    8.30
  -3  -4   5   22.91    5.98
  -3  -4   6    2.45    4.51
  -3  -4   6    7.98    3.19
  -3  -4   7   10.63    6.93
  -3  -4   8   30.59   10.62
  -3  -4   9   13.53    7.77
  -3  -4  10   67.80   17.90
  -3  -4  11   17.28    9.56
  -3  -4  12    2.75    4.97
  -3  -3  -9  281.61   17.91
  -3  -3  -8    1.48    1.87
  -3  -3  -7  167.29   14.64
  -3  -3  -6   68.77    9.67
  -3  -3  -5  324.13   21.20
  -3  -3  -4   43.22    7.77
  -3  -3  -4   45.32    8.65
  -3  -3  -3    4.25    2.59
  -3  -3  -3    5.64    2.71
  -3  -3  -2  301.71   20.66
  -3  -3  -2  294.27   19.99
  -3  -3  -1    3.22    1.83
  -3  -3  -1    7.28    3.54
  -3  -3  -1    3.09    1.14
  -3  -3   0  164.57   15.06
  -3  -3   0  143.94   13.85
  -3  -3   0  144.14   14.22
  -3  -3   0  140.30   10.12
  -3  -3   1  888.33   36.70
  -3  -3   1  804.96   33.29
  -3  -3   1  836.38   30.00
  -3  -3   1  849.32   34.49
  -3  -3   2  365.53   22.63
  -3  -3   2  379.71   25.57
  -3  -3   2  334.67   22.55
  -3  -3   3   70.24    9.72
  -3  -3   3   83.99   12.82
  -3  -3   4   -1.13    3.56
  -3  -3   4    0.86    1.57
  -3  -3   5   36.76    9.40
  -3  -3   5   27.36    5.81
  -3  -3   6   10.54    3.52
  -3  -3   6   14.88    7.28
  -3  -3   7   28.58    8.97
  -3  -3   8   10.15    7.54
  -3  -3   9   19.35    9.91
  -3  -3  10   18.09    9.73
  -3  -3  11   42.48   15.22
  -3  -3  12    4.13    4.70
  -3  -3  13   16.78   12.12
  -3  -2  -9   17.77    8.86
  -3  -2  -8   27.73    9.75
  -3  -2  -7  155.42   13.13
  -3  -2  -7  144.85   20.32
  -3  -2  -6  127.10   17.58
  -3  -2  -6  146.01   13.01
  -3  -2  -5   68.55   11.73
  -3  -2  -5   72.11    9.29
  -3  -2  -4  209.09   19.09
  -3  -2  -4  213.21   17.81
  -3  -2  -4  212.97   16.15
  -3  -2  -3   21.07    4.99
  -3  -2  -3   26.46    6.05
  -3  -2  -3   24.82    6.00
  -3  -2  -2  883.75   32.53
  -3  -2  -2  823.08   31.90
  -3  -2  -2  846.54   29.50
  -3  -2  -1   22.79    5.11
  -3  -2  -1   28.83    4.63
  -3  -2  -1   30.09    5.85
  -3  -2   0  751.40   19.49
  -3  -2   0  730.68   30.47
  -3  -2   0  778.02   30.96
  -3  -2   0  775.95   30.20
  -3  -2   0  748.14   17.24
  -3  -2   1  162.50   12.05
  -3  -2   1  155.85   13.81
  -3  -2   1  164.80   14.83
  -3  -2   2   30.71    6.25
  -3  -2   2   31.10    7.13
  -3  -2   2   38.23    6.81
  -3  -2   3   80.62   11.86
  -3  -2   3   70.19    9.20
  -3  -2   3   65.48   10.58
  -3  -2   4  367.64   20.83
  -3  -2   4  383.53   27.96
  -3  -2   5  145.54   18.56
  -3  -2   5  137.22   12.41
  -3  -2   6    5.12    4.94
  -3  -2   7   52.46   13.78
  -3  -2   8  215.98   27.88
  -3  -2   9    2.20    3.33
  -3  -2  10  124.62   23.80
  -3  -2  11    6.65    4.48
  -3  -2  12   -4.69    5.68
  -3  -2  13   24.75   12.56
  -3  -1 -11   -4.28    7.32
  -3  -1 -10   94.22   20.28
  -3  -1  -9  372.88   37.05
  -3  -1  -8    1.10    3.72
  -3  -1  -7  577.90   41.42
  -3  -1  -6  183.35   21.41
  -3  -1  -5  510.32   33.18
  -3  -1  -4   49.58    7.51
  -3  -1  -4   53.89    8.64
  -3  -1  -4   54.24    9.84
  -3  -1  -3  563.79   25.68
  -3  -1  -3  617.29   26.72
  -3  -1  -3  559.65   21.37
  -3  -1  -2  815.36   29.17
  -3  -1  -2  810.14   30.62
  -3  -1  -2  799.62   19.96
  -3  -1  -1 2226.10   47.12
  -3  -1  -1 2143.67   27.15
  -3  -1   0  272.39   16.46
  -3  -1   0  297.42   18.62
  -3  -1   0  284.96   17.42
  -3  -1   1  787.02   30.14
  -3  -1   1  748.44   30.04
  -3  -1   2 1552.52   46.06
  -3  -1   2 1595.88   42.99
  -3  -1   3   11.98    4.61
  -3  -1   4  255.12   14.66
  -3  -1   4  289.24   23.45
  -3  -1   5    3.98    3.97
  -3  -1   5   13.67    3.85
  -3  -1   6   44.73   10.16
  -3  -1   6   47.90    8.05
  -3  -1   7  365.08   32.69
  -3  -1   8  431.72   37.85
  -3  -1   9    5.88    4.35
  -3  -1  10   48.63   14.83
  -3  -1  11   53.16   15.54
  -3  -1  12   -2.16    6.83
  -3  -1  13    8.25    5.49
  -3  -1  14    2.79    5.07
  -3   0 -12    2.33    4.23
  -3   0 -11   -3.56    4.74
  -3   0 -10   43.04   14.05
  -3   0  -9   63.02   17.20
  -3   0  -8   11.59    4.26
  -3   0  -7  396.76   34.89
  -3   0  -6  153.33   18.67
  -3   0  -6  192.80   22.58
  -3   0  -5    7.46    3.27
  -3   0  -5   17.63    4.64
  -3   0  -4  195.84   16.88
  -3   0  -4  208.43   16.41
  -3   0  -3  197.32   14.45
  -3   0  -3  177.27   14.49
  -3   0  -2 1164.54   31.83
  -3   0  -2 1203.07   32.94
  -3   0  -1   39.50    5.98
  -3   0  -1   38.38    5.31
  -3   0   0  737.55   25.29
  -3   0   0  763.89   25.19
  -3   0   0  715.32   22.37
  -3   0   1   26.99    5.55
  -3   0   2  182.06   14.85
  -3   0   3  522.77   27.58
  -3   0   4  422.03   27.22
  -3   0   5  763.76   39.18
  -3   0   6  103.27   12.62
  -3   0   6  112.96   16.62
  -3   0   7  152.57   20.63
  -3   0   8  150.29   21.88
  -3   0   9  122.82   20.87
  -3   0  10  122.04   21.71
  -3   0  11    3.76    4.90
  -3   0  12    6.46    5.94
  -3   0  13   12.20    8.07
  -3   0  14    8.27    7.71
  -3   1 -13   -2.16    4.58
  -3   1 -12   -6.41   10.47
  -3   1 -11   -1.75    8.65
  -3   1 -10   18.82    9.53
  -3   1  -9  142.81   24.28
  -3   1  -8   32.47   11.63
  -3   1  -7  125.40   20.19
  -3   1  -7  154.13   22.84
  -3   1  -6    7.63    4.35
  -3   1  -5   -0.11    2.18
  -3   1  -4  415.91   23.91
  -3   1  -4  447.60   28.62
  -3   1  -3  744.21   26.87
  -3   1  -3  789.75   34.58
  -3   1  -2   45.58    5.89
  -3   1  -2   42.55    7.58
  -3   1  -1  262.64   17.19
  -3   1  -1  263.48   13.05
  -3   1   0  118.00    8.97
  -3   1   0  117.68   10.79
  -3   1   0  125.53    9.26
  -3   1   1  988.10   28.42
  -3   1   1  936.87   31.62
  -3   1   2  439.79   21.32
  -3   1   3   22.28    5.09
  -3   1   4  268.46   20.68
  -3   1   5   28.22    7.13
  -3   1   6   45.68   10.37
  -3   1   7   21.84    7.48
  -3   1   8  121.56   19.27
  -3   1   9    9.88    6.49
  -3   1  10   92.31   18.65
  -3   1  11    3.24    5.24
  -3   1  12   72.88   17.89
  -3   1  13   42.51   15.36
  -3   1  14   -9.88    8.20
  -3   2 -13    2.05    5.88
  -3   2 -12   -3.23    5.31
  -3   2 -11  -10.33    7.90
  -3   2 -10   26.47   11.81
  -3   2  -9   75.49   17.95
  -3   2  -8  136.56   22.80
  -3   2  -8  167.56   25.78
  -3   2  -7  109.09   19.76
  -3   2  -7  117.55   20.78
  -3   2  -6   17.83    7.57
  -3   2  -5    2.41    3.33
  -3   2  -4   94.09   14.54
  -3   2  -4  100.02   11.18
  -3   2  -3   -1.53    3.27
  -3   2  -3    2.03    1.55
  -3   2  -2  157.21   10.69
  -3   2  -2  145.89   15.65
  -3   2  -1 1057.72   22.25
  -3   2  -1 1132.37   40.76
  -3   2   0  538.98   26.82
  -3   2   0  493.04   15.51
  -3   2   0  532.57   16.41
  -3   2   1  156.19   14.79
  -3   2   1  151.98    9.65
  -3   2   2   18.36    5.26
  -3   2   2   15.43    3.48
  -3   2   3    5.42    3.68
  -3   2   4  115.70   13.14
  -3   2   5    3.54    3.68
  -3   2   6    6.71    1.85
  -3   2   7  106.24   16.16
  -3   2   8   -9.49    5.96
  -3   2   9  220.45   27.10
  -3   2  10   12.31    7.75
  -3   2  11   20.06   11.25
  -3   2  12    7.55    8.31
  -3   2  13   29.31   14.04
  -3   2  14   20.90   12.37
  -3   3 -13    6.92    7.35
  -3   3 -12    4.84    6.24
  -3   3 -11   -3.28    5.09
  -3   3 -10   63.94   18.30
  -3   3  -9   56.91   16.41
  -3   3  -9   56.56   15.77
  -3   3  -8  193.37   29.05
  -3   3  -8  195.64   29.12
  -3   3  -7   61.33   16.08
  -3   3  -6   74.40   15.91
  -3   3  -5  125.92   19.84
  -3   3  -4   10.45    3.93
  -3   3  -4   23.30    5.39
  -3   3  -3    2.23    2.79
  -3   3  -3    7.43    2.58
  -3   3  -2  524.27   17.63
  -3   3  -2  610.51   35.45
  -3   3  -1  613.82   33.92
  -3   3  -1  539.79   12.74
  -3   3   0    1.38    2.61
  -3   3   1  605.52   15.09
  -3   3   1  651.84   32.87
  -3   3   2  934.12   25.34
  -3   3   2  968.17   41.08
  -3   3   3   37.70    6.17
  -3   3   3   31.79    7.59
  -3   3   4   37.79    6.90
  -3   3   5   60.68    9.98
  -3   3   6   -0.86    4.37
  -3   3   7   40.94   10.99
  -3   3   8   -0.38    4.27
  -3   3   9    2.03    6.14
  -3   3  10  180.71   26.25
  -3   3  11    6.71    5.12
  -3   3  12   18.21   11.20
  -3   3  13   17.48    9.73
  -3   3  14   -7.34    8.52
  -3   3  14   -8.41    7.79
  -3   3  15   -3.63    5.58
  -3   3  15   -1.06    8.38
  -3   4 -12   -3.02    5.37
  -3   4 -11    0.16    5.73
  -3   4 -10   63.14   18.70
  -3   4  -9    7.44    5.67
  -3   4  -9   39.54   13.98
  -3   4  -8   16.27   10.93
  -3   4  -7  383.77   40.18
  -3   4  -6  360.03   36.97
  -3   4  -5  228.44   28.78
  -3   4  -4   37.06   12.05
  -3   4  -4   33.63    6.33
  -3   4  -3    5.43    2.35
  -3   4  -3    4.06    4.14
  -3   4  -2  197.97   22.42
  -3   4  -2  137.74    8.43
  -3   4  -1  157.99   19.26
  -3   4   0   -1.33    4.06
  -3   4   1  616.04   35.50
  -3   4   2  676.48   36.93
  -3   4   3  101.43    9.46
  -3   4   3  108.42   15.33
  -3   4   4  136.27   12.85
  -3   4   4  135.14   17.58
  -3   4   5  167.98   16.74
  -3   4   6   25.67    7.77
  -3   4   7   89.78   14.82
  -3   4   8   23.32    8.45
  -3   4   9   87.63   16.69
  -3   4  10    5.01    6.34
  -3   4  11   45.30   14.15
  -3   4  12    0.26    6.40
  -3   4  12   -9.86    5.17
  -3   4  13   18.27   10.97
  -3   4  13    4.19    7.27
  -3   4  14   19.33   10.97
  -3   4  14    8.12    7.77
  -3   4  15   -5.90    6.87
  -3   5 -11    8.56    8.03
  -3   5 -10    8.39    8.27
  -3   5 -10    0.03    3.39
  -3   5  -9   -4.05    5.71
  -3   5  -9    9.23    7.48
  -3   5  -8   16.34    8.58
  -3   5  -7   18.19   10.06
  -3   5  -6   33.57   12.43
  -3   5  -5    2.25    3.96
  -3   5  -4  198.60   26.69
  -3   5  -3  140.42   10.73
  -3   5  -3  224.62   27.12
  -3   5  -2  109.53    6.10
  -3   5  -2  601.87   42.16
  -3   5  -1   22.04    8.75
  -3   5   0   79.91   15.05
  -3   5   1  212.03   23.85
  -3   5   2    0.15    0.74
  -3   5   2    1.21    3.09
  -3   5   3   82.66   14.19
  -3   5   3   60.95    7.66
  -3   5   4   25.39    6.03
  -3   5   4   21.43    7.45
  -3   5   5  175.15   17.52
  -3   5   5  204.87   24.02
  -3   5   5  199.53   17.19
  -3   5   6    9.26    5.91
  -3   5   7  304.37   26.35
  -3   5   8   69.41   13.11
  -3   5   9   -1.20    4.33
  -3   5   9   10.20    6.49
  -3   5  10    9.13    7.00
  -3   5  10   32.73   11.15
  -3   5  11    3.59    5.47
  -3   5  11   19.05    8.23
  -3   5  12   -0.52    3.87
  -3   5  12    5.16    6.01
  -3   5  13    3.09    3.52
  -3   5  14    5.37    8.52
  -3   5  15  -10.52    8.70
  -3   6 -10  -12.37    9.42
  -3   6  -9    3.65    5.35
  -3   6  -9   -3.79    5.37
  -3   6  -8   11.84   12.72
  -3   6  -7   -6.28    6.27
  -3   6  -6    8.59    8.43
  -3   6  -5   -4.26    5.07
  -3   6  -4   49.94   14.42
  -3   6  -3    3.61    5.03
  -3   6  -2    9.18    5.07
  -3   6  -1   73.15   15.71
  -3   6   0   22.26    8.88
  -3   6   1  448.07   37.11
  -3   6   2  -10.11    5.64
  -3   6   3   13.84    3.18
  -3   6   3   21.51    7.99
  -3   6   4   77.67   10.00
  -3   6   4   65.99   14.02
  -3   6   5    2.81    2.01
  -3   6   5    4.17    2.97
  -3   6   6    6.30    3.76
  -3   6   6    6.17    4.64
  -3   6   7   30.53    7.96
  -3   6   8   44.56   11.74
  -3   6   9   -3.09    5.65
  -3   6  10   22.90   10.64
  -3   6  11   11.28    6.76
  -3   6  12   -1.52    4.01
  -3   6  13   -2.44    4.54
  -3   6  14   -0.03   10.51
  -3   6  15    5.81    9.81
  -3   7  -9   13.88    9.82
  -3   7  -8   11.75    8.95
  -3   7  -7    3.96    3.68
  -3   7  -6    7.76    9.05
  -3   7  -5    4.15    6.17
  -3   7  -4   13.27    8.34
  -3   7  -3    0.64    4.47
  -3   7  -2    5.65    4.47
  -3   7  -1   54.47   14.21
  -3   7   0   18.74    9.98
  -3   7   1   58.35   14.33
  -3   7   2   -0.45    5.37
  -3   7   3   -3.14    6.11
  -3   7   3    3.62    1.65
  -3   7   4  108.42   10.92
  -3   7   4  149.41   22.23
  -3   7   5   28.91    6.54
  -3   7   5   33.52   10.00
  -3   7   6   10.53    4.96
  -3   7   6    2.76    3.94
  -3   7   7   54.52   14.54
  -3   7   7   47.81   10.50
  -3   7   8   -1.94    3.02
  -3   7   8    9.50    6.96
  -3   7   9    4.97    4.18
  -3   7  10    1.04    4.27
  -3   7  11    1.71    2.77
  -3   7  12    5.52    6.63
  -3   7  13   10.13    9.10
  -3   7  14   10.97    8.37
  -3   7  15   -5.98    6.58
  -3   8  -7  -11.55    8.91
  -3   8  -6   -4.40    5.60
  -3   8  -5   49.41   16.49
  -3   8  -4   11.79    8.63
  -3   8  -3    3.57    2.83
  -3   8  -2   -1.43    2.68
  -3   8  -1    9.31    8.93
  -3   8   0   59.11   15.63
  -3   8   1   -0.38    4.19
  -3   8   2  158.49   24.60
  -3   8   3    2.93    3.33
  -3   8   4  183.55   26.35
  -3   8   5    7.15    3.88
  -3   8   5   28.83   11.05
  -3   8   6    0.48    2.20
  -3   8   6    1.33    3.44
  -3   8   7   39.58    9.42
  -3   8   7   39.33   13.04
  -3   8   8    0.80    4.64
  -3   8   8    4.28    4.51
  -3   8   9   -1.88    3.86
  -3   8   9   -0.10    2.38
  -3   8  10   17.76    9.02
  -3   8  10   23.22    8.88
  -3   8  11    9.10    8.01
  -3   8  12   17.25    8.60
  -3   8  13    1.34    6.86
  -3   8  14   -2.42    4.60
  -3   8  15    3.40    5.29
  -3   9  -6   -0.30    3.32
  -3   9  -5   -2.80    4.85
  -3   9  -4    2.28    4.54
  -3   9  -3    4.85    3.06
  -3   9  -2   61.40   18.19
  -3   9  -1   10.55    8.84
  -3   9   0    9.15    8.57
  -3   9   1   20.40    9.39
  -3   9   2   42.53   14.66
  -3   9   3   42.49   12.95
  -3   9   4    0.57    4.18
  -3   9   5  118.27   22.45
  -3   9   6   21.73    9.58
  -3   9   7   26.56    7.55
  -3   9   7   29.20   11.31
  -3   9   8    2.49    5.10
  -3   9   8    2.60    2.31
  -3   9   9   28.48   11.74
  -3   9   9   21.55    8.79
  -3   9  10   13.02    7.30
  -3   9  10   28.30   12.75
  -3   9  11    1.31    2.29
  -3   9  11    6.29    6.05
  -3   9  12   11.70    6.45
  -3   9  12   18.28   10.28
  -3   9  13    3.73    4.86
  -3   9  14    1.09    3.67
  -3   9  15   13.26    9.30
  -3  10  -4   54.60   19.28
  -3  10  -3   15.84   10.93
  -3  10  -2   18.62   12.83
  -3  10  -1    0.68    3.14
  -3  10   0    1.10    2.94
  -3  10   1   72.68   19.07
  -3  10   2   27.56   11.59
  -3  10   3    4.11    6.41
  -3  10   4   24.37   10.76
  -3  10   5    7.37    5.23
  -3  10   6   25.44   11.26
  -3  10   7    8.67    5.15
  -3  10   8   11.39    7.73
  -3  10   9   -6.66    6.06
  -3  10  10   31.40   13.89
  -3  10  11   -2.42    2.59
  -3  10  11    7.77    6.82
  -3  10  12   10.04    8.37
  -3  10  12   -4.08    5.53
  -3  10  13    2.88    4.70
  -3  10  13   20.19   10.25
  -3  10  14   -6.56    6.57
  -3  10  15    6.16    5.81
  -3  11  -2  -12.67    9.65
  -3  11  -1   44.43   17.11
  -3  11   0    8.20    7.50
  -3  11   1   -6.11    6.27
  -3  11   2   21.19   10.79
  -3  11   3   11.19    6.61
  -3  11   4   43.05   15.84
  -3  11   5    7.38    8.63
  -3  11   6    6.82    7.04
  -3  11   7    1.20    3.55
  -3  11   8   11.83    8.04
  -3  11   9    4.49    5.30
  -3  11  10   26.52   13.11
  -3  11  11   25.33   11.27
  -3  11  12   -8.07    7.37
  -3  12   1    7.35    7.40
  -3  12   2   41.42   15.88
  -3  12   3   17.04   10.82
  -3  12   4   29.95   13.67
  -3  12   5   11.22    8.44
  -3  12   6  -11.16    8.34
  -3  12   7   49.24   17.31
  -3  12   8    5.47    5.55
  -3  12   9    4.11    5.20
  -3  12  10   23.84   11.26
  -2 -12  -4   36.60   10.13
  -2 -12  -3    0.96    1.79
  -2 -11  -3    1.09    1.42
  -2 -11  -2   98.16   15.16
  -2 -11  -1    6.83    4.35
  -2 -11   0   42.40    9.99
  -2 -11   1   40.00   10.37
  -2 -10  -3    0.13    1.54
  -2 -10  -2   10.28    3.76
  -2 -10  -1  107.52   15.35
  -2 -10   0   -1.15    2.58
  -2 -10   1   60.14   12.24
  -2 -10   2   16.53    5.83
  -2 -10   3    7.83    4.94
  -2 -10   4   15.62    8.02
  -2  -9  -2    6.14    4.17
  -2  -9  -1   43.09    9.55
  -2  -9   0   56.70   11.10
  -2  -9   1   37.42    9.47
  -2  -9   2   25.98    7.73
  -2  -9   3   -0.47    2.98
  -2  -9   4  143.22   20.58
  -2  -9   5    5.85    4.65
  -2  -9   6   50.25   14.58
  -2  -9   7   15.15    8.59
  -2  -8  -2   84.72   12.58
  -2  -8  -1  118.86   15.00
  -2  -8   0   19.15    6.36
  -2  -8   1   18.21    6.46
  -2  -8   2  129.26   17.46
  -2  -8   3   19.07    6.22
  -2  -8   4   57.17   12.58
  -2  -8   5   -0.13    1.64
  -2  -8   6   12.51    8.24
  -2  -8   7   36.82   12.42
  -2  -8   8    9.37    7.31
  -2  -8   9    4.70    3.73
  -2  -7  -1   29.06    7.08
  -2  -7   0    3.73    1.73
  -2  -7   1   74.98   12.30
  -2  -7   2  293.91   25.26
  -2  -7   3   -3.12    5.08
  -2  -7   4  300.46   28.14
  -2  -7   5    3.22    4.07
  -2  -7   6   17.52    8.51
  -2  -7   7   18.53    8.96
  -2  -7   8    0.22    5.19
  -2  -7   9   10.01    7.23
  -2  -7  10   13.02    8.45
  -2  -7  11    7.35    6.92
  -2  -6  -2   30.57    6.80
  -2  -6  -1  161.66   15.65
  -2  -6   0   44.63    8.48
  -2  -6   1  731.16   36.27
  -2  -6   2  867.01   41.52
  -2  -6   3  208.42   21.54
  -2  -6   4   -2.37    3.29
  -2  -6   5   -1.72    4.64
  -2  -6   6    8.91    5.65
  -2  -6   7   47.48   13.67
  -2  -6   8    3.90    2.95
  -2  -6   9    4.64    5.31
  -2  -6  10   35.64   14.24
  -2  -6  11   -5.66    6.02
  -2  -6  12   -0.29    3.02
  -2  -5  -3  402.33   24.59
  -2  -5  -2  176.24   14.96
  -2  -5  -2  174.93   15.69
  -2  -5  -1    1.19    1.57
  -2  -5  -1    3.96    2.56
  -2  -5   0  121.76   13.09
  -2  -5   0  128.72   14.01
  -2  -5   0  112.82   12.60
  -2  -5   1  103.79   12.61
  -2  -5   2  512.37   30.32
  -2  -5   3   98.25   13.96
  -2  -5   4  216.22   22.37
  -2  -5   5   73.38   14.17
  -2  -5   6  110.31   18.11
  -2  -5   7   11.14    6.18
  -2  -5   8   -5.26    6.58
  -2  -5   9   17.99    7.86
  -2  -5  10   12.64    7.87
  -2  -5  11   -1.02    3.61
  -2  -5  12   11.65    8.54
  -2  -4 -10    1.21    0.91
  -2  -4  -4  356.16   23.81
  -2  -4  -3  617.00   29.24
  -2  -4  -2   11.60    4.04
  -2  -4  -2   14.52    3.49
  -2  -4  -1  180.94   14.75
  -2  -4  -1  182.65   13.24
  -2  -4   0    9.06    3.74
  -2  -4   0    4.52    1.72
  -2  -4   0    2.93    2.10
  -2  -4   1  550.24   27.81
  -2  -4   1  544.13   26.59
  -2  -4   1  576.61   28.48
  -2  -4   2  324.80   22.93
  -2  -4   3  149.65   16.83
  -2  -4   4   18.72    5.76
  -2  -4   5    5.51    4.13
  -2  -4   6    6.07    2.84
  -2  -4   6   11.12    5.86
  -2  -4   7  126.83   20.28
  -2  -4   8   23.99    9.66
  -2  -4   9   34.63   13.19
  -2  -4  10   79.48   19.22
  -2  -4  11  -10.73    7.76
  -2  -4  12   12.72   10.06
  -2  -4  13    9.94    8.22
  -2  -3 -10  176.29   10.89
  -2  -3  -9    1.37    1.19
  -2  -3  -8   39.10    6.13
  -2  -3  -4   33.23    7.00
  -2  -3  -3    7.15    3.53
  -2  -3  -2   41.82    6.82
  -2  -3  -1  270.29   16.47
  -2  -3  -1  266.22   12.31
  -2  -3   0    1.41    1.98
  -2  -3   0    0.12    1.18
  -2  -3   0    0.03    1.16
  -2  -3   1 1227.52   39.01
  -2  -3   1 1214.79   36.86
  -2  -3   2  171.47   15.88
  -2  -3   2  172.66   15.96
  -2  -3   3  453.47   27.91
  -2  -3   4  170.61   18.18
  -2  -3   5   49.74   10.79
  -2  -3   5   48.66    7.07
  -2  -3   6   31.05    8.81
  -2  -3   6   26.28    4.85
  -2  -3   7   94.66   17.43
  -2  -3   7  104.42    8.86
  -2  -3   8    6.23    3.62
  -2  -3   9   11.98    7.67
  -2  -3  10   22.03    8.70
  -2  -3  11   36.09   13.74
  -2  -3  12    9.87    8.15
  -2  -3  13   10.46    8.80
  -2  -2  -7  469.81   19.02
  -2  -2  -6   32.28    5.15
  -2  -2  -5   92.61    8.95
  -2  -2  -5   86.77   12.83
  -2  -2  -4   50.39    8.68
  -2  -2  -4   40.38    6.06
  -2  -2  -4   38.89    7.03
  -2  -2  -3   40.33    7.18
  -2  -2  -3   41.83    6.98
  -2  -2  -3   37.82    6.08
  -2  -2  -2 4490.15   64.86
  -2  -2  -1    3.84    2.09
  -2  -2   0  314.27   16.44
  -2  -2   0  297.57   16.70
  -2  -2   0  287.25   12.07
  -2  -2   1 1759.71   43.62
  -2  -2   1 1733.48   39.94
  -2  -2   1 1698.17   38.25
  -2  -2   2   47.21    7.63
  -2  -2   2   40.95    6.19
  -2  -2   2   42.03    7.75
  -2  -2   3  299.33   16.57
  -2  -2   3  312.97   21.78
  -2  -2   3  296.13   21.69
  -2  -2   4  444.01   19.39
  -2  -2   4  414.11   27.60
  -2  -2   5  252.04   23.09
  -2  -2   5  247.63   14.01
  -2  -2   6  133.09   18.41
  -2  -2   7  113.06   18.16
  -2  -2   8   32.52   11.09
  -2  -2   9   -2.50    4.23
  -2  -2  10   86.12   19.28
  -2  -2  11    7.86    7.39
  -2  -2  12   -0.18    4.93
  -2  -2  13    5.54    9.36
  -2  -2  14   12.34    9.30
  -2  -1  -9   61.80   15.25
  -2  -1  -8  152.37   21.47
  -2  -1  -7  236.94   24.87
  -2  -1  -6  269.13   24.79
  -2  -1  -5    4.92    3.73
  -2  -1  -4  766.18   24.28
  -2  -1  -4  841.90   32.56
  -2  -1  -4  798.41   35.83
  -2  -1  -3  977.49   27.73
  -2  -1  -3  914.47   34.10
  -2  -1  -3  981.54   31.30
  -2  -1  -2 1063.21   29.57
  -2  -1  -2 1051.15   21.51
  -2  -1  -2 1041.25   30.86
  -2  -1  -2 1033.10   28.93
  -2  -1  -1 3082.98   47.31
  -2  -1  -1 3166.76   49.86
  -2  -1   0  741.75   23.77
  -2  -1   0  729.86   22.96
  -2  -1   0  747.88   24.26
  -2  -1   1 6331.29   75.18
  -2  -1   1 6305.37   71.33
  -2  -1   2    6.60    2.42
  -2  -1   2    3.62    2.36
  -2  -1   3 1375.53   43.66
  -2  -1   3 1368.95   32.39
  -2  -1   3 1349.92   29.46
  -2  -1   4  649.28   33.11
  -2  -1   4  666.14   24.85
  -2  -1   5    2.05    3.44
  -2  -1   5    0.67    1.71
  -2  -1   6    4.54    4.46
  -2  -1   7   62.43   13.16
  -2  -1   8    5.78    3.08
  -2  -1   9   16.99    8.15
  -2  -1  10   -4.29    6.69
  -2  -1  11    6.22    3.50
  -2  -1  12   19.64   11.52
  -2  -1  13   18.10   10.04
  -2  -1  14   12.80    9.93
  -2   0 -11    3.55    5.46
  -2   0 -10    1.13    5.53
  -2   0  -9    2.32    3.63
  -2   0  -8  331.69   32.93
  -2   0  -7  283.47   27.99
  -2   0  -6  235.06   23.69
  -2   0  -5  320.06   24.12
  -2   0  -5  310.30   25.36
  -2   0  -4    4.21    2.83
  -2   0  -4   -3.22    2.86
  -2   0  -4   -3.27    3.70
  -2   0  -3  517.06   22.15
  -2   0  -3  505.36   23.56
  -2   0  -2  110.14    8.88
  -2   0  -2  115.83    9.42
  -2   0  -1  524.90   16.30
  -2   0  -1  506.56   17.29
  -2   0   0   19.12    3.37
  -2   0   0   21.60    3.56
  -2   0   0   22.29    3.16
  -2   0   1 1552.20   33.70
  -2   0   2  185.48   13.61
  -2   0   3  109.85   11.74
  -2   0   4 2183.99   58.03
  -2   0   5  263.62   22.36
  -2   0   5  248.62   17.95
  -2   0   6  702.88   33.23
  -2   0   6  695.01   39.56
  -2   0   7   68.18   13.13
  -2   0   8    2.12    4.03
  -2   0   9   26.24    9.94
  -2   0  10   -3.84    4.32
  -2   0  11   -2.76    3.96
  -2   0  12   38.21   15.21
  -2   0  13    3.90    5.29
  -2   0  14   -6.89    6.93
  -2   0  14    1.88    4.73
  -2   1 -12   15.48    9.12
  -2   1 -11   -7.34    6.34
  -2   1 -10    6.36    5.87
  -2   1  -9    1.65    4.36
  -2   1  -8  125.62   20.84
  -2   1  -7   74.14   15.21
  -2   1  -7   94.24   16.70
  -2   1  -6   -2.53    4.45
  -2   1  -6    3.32    3.15
  -2   1  -5  238.38   22.69
  -2   1  -4   85.94   12.25
  -2   1  -4   92.14   10.98
  -2   1  -3   64.20    9.91
  -2   1  -3   64.62    7.93
  -2   1  -2   80.93    7.08
  -2   1  -2   80.66    7.53
  -2   1  -2   93.65   10.23
  -2   1  -1    1.74    1.25
  -2   1  -1    4.35    2.60
  -2   1   0   94.29    6.72
  -2   1   0  103.73    6.80
  -2   1   0  115.10    9.48
  -2   1   1  214.30   10.86
  -2   1   1  211.60   13.45
  -2   1   2   46.20    6.05
  -2   1   3   11.24    3.28
  -2   1   4   14.97    4.79
  -2   1   5   16.56    5.78
  -2   1   6   19.07    5.74
  -2   1   7  690.40   41.82
  -2   1   8   10.93    4.58
  -2   1   9  154.74   22.18
  -2   1  10  143.32   23.51
  -2   1  11   13.11    9.25
  -2   1  12   67.38   18.25
  -2   1  13   17.89   10.34
  -2   1  14  -18.27   11.03
  -2   1  14   15.45    9.97
  -2   1  15   17.45   10.78
  -2   1  15    0.03    6.87
  -2   2 -13   -0.03    7.65
  -2   2 -12   -8.89    7.39
  -2   2 -11  -20.69   10.28
  -2   2 -10   34.73   12.07
  -2   2  -9   38.92   13.19
  -2   2  -8  172.60   25.76
  -2   2  -8  194.47   26.32
  -2   2  -7  259.55   28.92
  -2   2  -7  238.20   28.49
  -2   2  -6    0.08    4.74
  -2   2  -5   34.88    8.99
  -2   2  -4    4.96    4.24
  -2   2  -4    2.34    2.06
  -2   2  -3   94.75    9.78
  -2   2  -3  103.31   13.64
  -2   2  -2  990.88   38.60
  -2   2  -2  981.16   25.11
  -2   2  -1   10.94    4.29
  -2   2  -1   13.92    2.28
  -2   2   0   24.99    5.43
  -2   2   1   28.37    3.25
  -2   2   1   19.31    5.23
  -2   2   2   40.86    5.29
  -2   2   3  405.68   20.08
  -2   2   4  398.18   23.00
  -2   2   5  121.24   13.93
  -2   2   6   23.00    7.00
  -2   2   7  121.36   17.04
  -2   2   8   12.58    7.25
  -2   2   9  139.97   21.40
  -2   2  10  195.43   27.50
  -2   2  11   35.29   12.66
  -2   2  12   66.42   16.89
  -2   2  13   39.62   14.65
  -2   2  13   61.22   17.72
  -2   2  14   15.41    9.65
  -2   2  14    7.52    8.72
  -2   2  15    9.25    6.69
  -2   3 -13   10.47    9.90
  -2   3 -12    1.32    3.74
  -2   3 -11   16.12   10.40
  -2   3 -10   20.81   10.65
  -2   3  -9   -4.73    5.18
  -2   3  -8   97.02   20.75
  -2   3  -8   86.91   17.90
  -2   3  -7   50.36   13.20
  -2   3  -6   24.42    7.69
  -2   3  -5  141.61   20.36
  -2   3  -4  428.45   23.71
  -2   3  -4  503.75   35.61
  -2   3  -3    9.25    2.90
  -2   3  -3    9.30    5.14
  -2   3  -2  314.71   14.12
  -2   3  -2  331.35   25.15
  -2   3  -1   64.28    4.55
  -2   3  -1   82.84   11.96
  -2   3   0   46.09    8.82
  -2   3   1 1096.11   19.58
  -2   3   1 1100.03   39.56
  -2   3   2  250.90   11.82
  -2   3   2  263.74   19.77
  -2   3   3   31.45    5.28
  -2   3   4   60.52    8.74
  -2   3   5  175.89   16.85
  -2   3   6  305.36   24.26
  -2   3   7  527.52   35.10
  -2   3   8   -0.80    2.34
  -2   3   9    8.68    6.03
  -2   3  10  147.25   22.83
  -2   3  11    7.33    7.05
  -2   3  12   48.83   16.70
  -2   3  12   77.79   19.16
  -2   3  13   78.70   21.07
  -2   3  13   39.56   15.75
  -2   3  14    3.83    5.58
  -2   3  14   14.40    9.18
  -2   3  15   18.05   12.36
  -2   4 -13   13.25    9.69
  -2   4 -12   -0.65    3.52
  -2   4 -11   26.28   13.92
  -2   4 -10   38.15   15.05
  -2   4  -9   21.72   10.19
  -2   4  -9    3.87    2.99
  -2   4  -8   12.13    8.72
  -2   4  -8    8.90    8.00
  -2   4  -7   97.02   19.99
  -2   4  -6   -0.11    5.55
  -2   4  -5   37.05   11.51
  -2   4  -4  313.00   30.46
  -2   4  -4  266.44   19.21
  -2   4  -3  466.16   21.99
  -2   4  -3  523.39   36.68
  -2   4  -2   75.27    7.12
  -2   4  -2   75.98   13.43
  -2   4  -1  726.97   38.81
  -2   4   0  117.10   15.28
  -2   4   1  651.83   34.47
  -2   4   2    1.49    1.15
  -2   4   2   -0.22    2.11
  -2   4   3  158.86   17.53
  -2   4   3  144.40   11.98
  -2   4   4   88.94   10.39
  -2   4   5  129.09   13.94
  -2   4   6  297.70   23.59
  -2   4   7   42.44   10.01
  -2   4   8   40.58   10.81
  -2   4   9  171.17   23.14
  -2   4  10  -10.99    7.91
  -2   4  10    8.59    7.33
  -2   4  11    1.99    3.52
  -2   4  11   11.89    8.58
  -2   4  12   18.72   10.50
  -2   4  12  -24.31   10.94
  -2   4  13   16.81    9.57
  -2   4  14    4.54    5.92
  -2   4  15   32.04   15.96
  -2   5 -12    7.90    7.67
  -2   5 -11   19.99   10.67
  -2   5 -10   15.86   10.38
  -2   5  -9   -0.77    6.86
  -2   5  -9   -1.00    5.51
  -2   5  -8   39.99   16.09
  -2   5  -7   -5.76    5.30
  -2   5  -6    5.53    6.14
  -2   5  -5  319.14   35.42
  -2   5  -4  146.38   22.55
  -2   5  -4  146.10   14.53
  -2   5  -3   -1.41    1.36
  -2   5  -3   -4.56    6.17
  -2   5  -2   17.48    3.70
  -2   5  -2   26.63    9.07
  -2   5  -1  224.90   23.73
  -2   5   0  565.03   36.82
  -2   5   1  151.18   18.74
  -2   5   2  852.16   21.74
  -2   5   2 1068.59   47.64
  -2   5   3   72.98    8.20
  -2   5   3   67.55   12.15
  -2   5   4  326.70   20.53
  -2   5   4  327.80   27.72
  -2   5   5   27.39    6.59
  -2   5   5   20.89    6.80
  -2   5   6  254.16   23.27
  -2   5   7   69.86   13.33
  -2   5   8   16.63    5.41
  -2   5   9   23.40    8.32
  -2   5  10    3.13    4.73
  -2   5  11   12.62    8.50
  -2   5  12   43.14   14.24
  -2   5  13  -11.20    7.96
  -2   5  14   -7.62    7.10
  -2   5  15   35.90   14.99
  -2   6 -11   13.79    9.73
  -2   6 -10    9.18    7.88
  -2   6 -10   16.37   13.95
  -2   6  -9  -16.20   10.28
  -2   6  -9    2.15    5.49
  -2   6  -8    4.76    5.83
  -2   6  -7    0.67    6.56
  -2   6  -6   35.39   12.64
  -2   6  -5  228.81   31.01
  -2   6  -4   85.30   19.03
  -2   6  -3    0.39    3.60
  -2   6  -2  255.40   29.50
  -2   6  -1    5.10    4.58
  -2   6   0   10.72    6.69
  -2   6   1  258.11   26.79
  -2   6   2   16.10    2.70
  -2   6   2   25.03    7.20
  -2   6   3  195.23   13.14
  -2   6   3  232.18   24.55
  -2   6   4  155.93   14.25
  -2   6   4  180.26   21.71
  -2   6   5  233.76   19.39
  -2   6   5  263.72   26.87
  -2   6   6    8.75    5.50
  -2   6   6    3.40    1.82
  -2   6   7  171.71   20.32
  -2   6   8   73.92   14.76
  -2   6   9   82.70   16.43
  -2   6  10    6.06    5.35
  -2   6  11    6.45    6.60
  -2   6  12   26.06   10.82
  -2   6  13    3.80    7.62
  -2   6  14   20.64   11.15
  -2   6  15   12.36   10.23
  -2   7 -10    3.96    5.84
  -2   7  -9   17.83   11.27
  -2   7  -9   -8.31    7.47
  -2   7  -8   18.86   12.53
  -2   7  -7    4.38    5.48
  -2   7  -6   16.76    8.69
  -2   7  -5   67.34   17.74
  -2   7  -4    8.63    5.57
  -2   7  -3  120.37   22.54
  -2   7  -2  100.58   20.31
  -2   7  -1   -4.97    4.00
  -2   7   0   42.57   12.49
  -2   7   1  285.18   30.08
  -2   7   2   -3.70    5.53
  -2   7   3   69.12    7.38
  -2   7   3   80.33   15.44
  -2   7   4  191.72   23.72
  -2   7   4  161.18   14.12
  -2   7   5   11.72    4.61
  -2   7   5   15.44    6.63
  -2   7   6  291.08   30.95
  -2   7   6  259.95   22.66
  -2   7   7   69.71   13.08
  -2   7   7   60.59   14.70
  -2   7   8    1.78    3.09
  -2   7   9    5.47    4.14
  -2   7  10   33.74   11.65
  -2   7  11    2.59    6.26
  -2   7  12   73.85   18.95
  -2   7  13   24.30   10.48
  -2   7  14    3.59    4.59
  -2   7  15   -1.04    3.84
  -2   8  -9   -6.97    7.06
  -2   8  -8   22.39   12.61
  -2   8  -7   -5.82    6.53
  -2   8  -6   34.81   14.29
  -2   8  -5   45.73   16.57
  -2   8  -4    6.81    5.94
  -2   8  -3  108.49   22.63
  -2   8  -2   -5.08    5.51
  -2   8  -1   20.23    9.30
  -2   8   0  145.02   23.78
  -2   8   1   90.73   17.75
  -2   8   2   10.72    6.58
  -2   8   3   -1.21    6.07
  -2   8   3    0.69    0.84
  -2   8   4  271.23   17.36
  -2   8   4  314.61   32.94
  -2   8   5   -3.11    4.10
  -2   8   5    6.70    5.96
  -2   8   6   87.34   13.02
  -2   8   6  137.09   22.23
  -2   8   7   29.83   10.80
  -2   8   7   26.84    8.20
  -2   8   8   18.74    7.69
  -2   8   8   11.91    7.11
  -2   8   9    5.68    4.67
  -2   8   9   25.27   10.66
  -2   8  10   45.81   13.57
  -2   8  11   13.64    8.53
  -2   8  12   23.43   10.40
  -2   8  13   14.15   10.50
  -2   8  14   -0.02    2.71
  -2   8  15   12.45   10.84
  -2   9  -6    3.91    5.78
  -2   9  -5   36.79   15.85
  -2   9  -4   -1.41    3.88
  -2   9  -3   26.43   14.12
  -2   9  -2   18.38    9.70
  -2   9  -1   19.98   10.92
  -2   9   0  144.93   25.37
  -2   9   1   25.20   11.33
  -2   9   2   11.98    8.25
  -2   9   3   97.93   19.88
  -2   9   4   43.18   13.00
  -2   9   5    0.32    2.37
  -2   9   5    6.30    3.76
  -2   9   6   15.95    5.34
  -2   9   6   25.99   10.60
  -2   9   7    8.73    2.87
  -2   9   7   18.57    8.84
  -2   9   8    4.84    4.85
  -2   9   8    3.16    2.46
  -2   9   9    5.90    5.04
  -2   9   9    3.50    3.77
  -2   9  10   21.10   10.14
  -2   9  10   13.97    8.32
  -2   9  11   11.23    8.96
  -2   9  11    3.39    6.57
  -2   9  12   -5.09    5.40
  -2   9  13    0.02    3.96
  -2   9  14  -18.87   10.44
  -2   9  15  -13.89    9.48
  -2  10  -5    9.44    8.44
  -2  10  -4   -4.25    5.71
  -2  10  -3  -11.26    8.59
  -2  10  -2   67.82   19.53
  -2  10  -1  -10.88    7.89
  -2  10   0   18.83   10.01
  -2  10   1    3.02    5.23
  -2  10   2   -0.54    2.90
  -2  10   3   38.97   14.45
  -2  10   4   13.24    8.65
  -2  10   5    2.40    4.56
  -2  10   6   46.52   14.27
  -2  10   7   -1.15    3.31
  -2  10   7    6.43    5.56
  -2  10   8    9.66    5.39
  -2  10   8   -0.74    2.88
  -2  10   9   -0.23    2.12
  -2  10   9    1.07    2.55
  -2  10  10    1.44    3.42
  -2  10  10   14.33    8.06
  -2  10  11   -1.19    2.41
  -2  10  11   -1.65    3.59
  -2  10  12    5.26    4.50
  -2  10  12   36.37   14.28
  -2  10  13   -2.00    4.06
  -2  10  13   -9.01    7.63
  -2  10  14   -1.53    3.99
  -2  10  15   -9.91    8.15
  -2  11  -3   19.08   11.45
  -2  11  -2   58.34   19.75
  -2  11  -1    6.22    7.80
  -2  11   0   -7.51    6.91
  -2  11   1   11.82    6.73
  -2  11   2   10.49    6.91
  -2  11   3   76.51   19.52
  -2  11   4   -1.98    4.06
  -2  11   5   -6.25    7.95
  -2  11   6   51.65   16.15
  -2  11   7   13.91    8.34
  -2  11   8    1.10    3.16
  -2  11   9    0.50    3.72
  -2  11  10   20.42   11.10
  -2  11  11   -2.92    3.97
  -2  11  11  -11.10    8.10
  -2  11  12   -2.18    3.81
  -2  11  12    3.40    5.19
  -2  11  13    8.33    8.26
  -2  11  13    7.09    7.14
  -2  11  14   12.39   10.38
  -2  11  15   -0.88    3.35
  -2  12  -1    3.26    3.17
  -2  12   0    6.44    6.75
  -2  12   1   31.42   12.01
  -2  12   2   -8.47    7.37
  -2  12   3   15.81   10.61
  -2  12   4   15.33    8.26
  -2  12   5  -11.44    8.41
  -2  12   6   54.43   17.65
  -2  12   7    3.46    4.93
  -2  12   8    8.03    6.86
  -2  12   9   20.29   10.64
  -2  12  10    5.44    5.96
  -2  12  11    5.97    7.30
  -2  12  12   -5.29    6.23
  -2  13   2    6.42    7.08
  -2  13   3   -0.36    2.82
  -2  13   4   24.47   13.65
  -2  13   5  -13.39    9.43
  -2  13   6    9.96    8.29
  -2  13   7   17.39   10.42
  -2  13   8  -13.31    9.20
  -2  13   9   17.05   12.44
  -2  13  10   17.63   10.64
  -1 -11  -4    0.38    2.09
  -1 -11  -3   65.53   11.13
  -1 -11  -2   17.89    5.64
  -1 -10  -3   44.01    9.51
  -1 -10  -2   34.45    8.20
  -1 -10  -1   20.12    6.31
  -1 -10   0   70.48   11.77
  -1 -10   1   38.89    8.93
  -1  -9  -2   80.20   11.67
  -1  -9  -1    5.25    2.39
  -1  -9   0    1.50    1.51
  -1  -9   1  105.43   14.10
  -1  -9   2   57.47   11.06
  -1  -9   3   20.52    6.32
  -1  -9   4   18.02    7.96
  -1  -9   5    3.07    3.21
  -1  -8  -2   40.96    8.32
  -1  -8  -1    6.33    2.96
  -1  -8   0   27.18    6.69
  -1  -8   1  141.53   15.74
  -1  -8   2    1.51    1.46
  -1  -8   3    8.00    3.78
  -1  -8   4   55.44   11.71
  -1  -8   5   10.18    6.02
  -1  -8   6   21.38    8.67
  -1  -8   7   25.13    9.91
  -1  -7  -3    1.07    1.97
  -1  -7  -2   34.66    7.06
  -1  -7  -1    2.64    1.28
  -1  -7  -1    2.14    0.88
  -1  -7   0   52.38    8.69
  -1  -7   0   51.88    8.66
  -1  -7   1   43.83    8.39
  -1  -7   2   -2.98    3.52
  -1  -7   3    7.76    4.03
  -1  -7   4  110.71   16.27
  -1  -7   5   -2.92    3.14
  -1  -7   6   70.25   15.50
  -1  -7   7    7.91    5.21
  -1  -7   8   -5.71    5.76
  -1  -7   9   10.20    5.67
  -1  -7  10    6.24    7.18
  -1  -6  -3  155.26   14.70
  -1  -6  -2    8.76    3.49
  -1  -6  -1  228.68   16.60
  -1  -6  -1  209.03   16.14
  -1  -6   0  310.17   20.30
  -1  -6   0  314.82   19.82
  -1  -6   1   76.52   10.41
  -1  -6   1   74.85   10.05
  -1  -6   2   36.67    7.78
  -1  -6   3  241.52   21.56
  -1  -6   4   36.48    9.50
  -1  -6   5   84.64   14.72
  -1  -6   6    9.41    5.63
  -1  -6   7   30.69    9.59
  -1  -6   8   11.35    7.23
  -1  -6   9   14.36    8.04
  -1  -6  10   42.67   14.95
  -1  -6  11   12.83   10.52
  -1  -6  12    8.82    7.50
  -1  -5  -4   11.64    4.34
  -1  -5  -3   44.68    7.50
  -1  -5  -2  962.86   33.17
  -1  -5  -2  935.37   37.28
  -1  -5  -1   20.00    4.67
  -1  -5   0  118.40   11.56
  -1  -5   0  110.18   10.90
  -1  -5   1  198.93   16.12
  -1  -5   1  170.53   14.21
  -1  -5   2  633.83   30.89
  -1  -5   3  710.61   35.51
  -1  -5   4  120.67   15.76
  -1  -5   5   50.65   11.36
  -1  -5   6  306.91   29.13
  -1  -5   7    5.20    2.77
  -1  -5   8   42.29   12.95
  -1  -5   9   51.96   14.24
  -1  -5  10    0.10    3.66
  -1  -5  11    3.78    4.88
  -1  -5  12   10.74   11.69
  -1  -4  -4  879.22   34.71
  -1  -4  -3  723.75   29.07
  -1  -4  -2 1061.12   32.82
  -1  -4  -2 1096.31   34.96
  -1  -4  -1   55.18    6.94
  -1  -4  -1   60.38    8.34
  -1  -4   0    1.67    1.20
  -1  -4   0    4.42    1.74
  -1  -4   0    5.65    3.00
  -1  -4   1 2429.55   52.60
  -1  -4   1 2532.40   50.68
  -1  -4   1 2404.78   61.34
  -1  -4   2    2.09    2.25
  -1  -4   3   20.91    6.13
  -1  -4   4  282.46   23.33
  -1  -4   5  220.08   22.07
  -1  -4   6  217.05   24.12
  -1  -4   7  147.24   21.46
  -1  -4   8    5.55    3.32
  -1  -4   9  111.70   20.91
  -1  -4  10    5.27    5.38
  -1  -4  11   19.09    9.84
  -1  -4  12   10.13    7.68
  -1  -4  13    4.35    6.77
  -1  -4  13   -8.40    8.80
  -1  -3 -10   15.51    2.80
  -1  -3  -4  386.45   22.41
  -1  -3  -3 8506.76   95.18
  -1  -3  -2 4729.88   65.42
  -1  -3  -1 1741.60   36.20
  -1  -3  -1 1694.40   36.30
  -1  -3   0   96.02    8.82
  -1  -3   0   96.29    8.52
  -1  -3   0   90.15    9.40
  -1  -3   1  667.68   25.44
  -1  -3   1  676.37   28.56
  -1  -3   2 1090.70   36.42
  -1  -3   2 1129.06   40.94
  -1  -3   3  211.14   17.73
  -1  -3   4  622.43   33.11
  -1  -3   5  180.68   19.70
  -1  -3   6    7.31    4.61
  -1  -3   7   44.29    5.48
  -1  -3   7   73.33   14.89
  -1  -3   8   11.65    6.97
  -1  -3   9   98.87   18.96
  -1  -3  10   -0.90    4.44
  -1  -3  11    2.51    6.94
  -1  -3  12    7.08    6.56
  -1  -3  13   -1.56    4.24
  -1  -3  13    5.66    6.54
  -1  -3  14    8.39    8.02
  -1  -2  -8  180.46    8.54
  -1  -2  -7   22.04    3.58
  -1  -2  -5 1571.82   49.63
  -1  -2  -4  133.56   13.07
  -1  -2  -4  153.58   13.66
  -1  -2  -3 2068.45   45.27
  -1  -2  -2  240.64   13.55
  -1  -2  -1    9.11    2.39
  -1  -2   0 2123.07   35.43
  -1  -2   0 2109.47   35.23
  -1  -2   0 2124.68   36.66
  -1  -2   1 1488.61   34.33
  -1  -2   1 1445.91   35.71
  -1  -2   2  604.58   25.10
  -1  -2   2  598.85   26.94
  -1  -2   3    2.51    2.31
  -1  -2   3    4.10    1.76
  -1  -2   4   -0.27    2.37
  -1  -2   5    6.01    2.05
  -1  -2   5    7.44    5.64
  -1  -2   6   84.36    6.07
  -1  -2   6  131.50   17.34
  -1  -2   7  116.91   17.99
  -1  -2   8   -0.41    4.45
  -1  -2   9   -3.22    5.92
  -1  -2  10   -0.04    5.92
  -1  -2  11    0.76    4.66
  -1  -2  12   19.70   10.20
  -1  -2  13    9.79    4.74
  -1  -2  13   11.04    8.17
  -1  -2  14    8.21    9.56
  -1  -2  14   36.23   15.54
  -1  -1  -6   42.38    9.16
  -1  -1  -5  182.43    8.44
  -1  -1  -5  216.46   19.25
  -1  -1  -4   35.62    7.57
  -1  -1  -4   24.08    3.35
  -1  -1  -4   20.99    5.09
  -1  -1  -3  199.04    9.95
  -1  -1  -3  238.48   15.12
  -1  -1  -3  234.32   15.16
  -1  -1  -3  230.18   15.88
  -1  -1  -2   88.54    7.68
  -1  -1  -2   82.58    7.83
  -1  -1   2 2579.58   34.92
  -1  -1   2 2684.37   49.07
  -1  -1   2 2703.57   51.49
  -1  -1   3  209.62    9.50
  -1  -1   3  216.57   17.02
  -1  -1   3  214.93   16.15
  -1  -1   4  497.92   13.99
  -1  -1   4  518.48   28.08
  -1  -1   5   88.06   12.65
  -1  -1   6   20.58    5.97
  -1  -1   7   -1.78    4.64
  -1  -1   8   50.34   12.49
  -1  -1   9   44.72   12.77
  -1  -1  10   -0.87    6.41
  -1  -1  11   -7.11    7.70
  -1  -1  12   -2.30    5.21
  -1  -1  13   13.64    9.18
  -1  -1  13    3.10    2.91
  -1  -1  14   -3.35    5.48
  -1  -1  14   21.37   11.96
  -1   0  -9   83.79   17.87
  -1   0  -8  248.47   27.18
  -1   0  -7   -3.94    2.70
  -1   0  -6   54.68   11.44
  -1   0  -5  291.07   23.24
  -1   0  -4  150.37   13.90
  -1   0  -4  143.19   14.79
  -1   0  -3   17.34    4.57
  -1   0  -3   29.71    5.48
  -1   0  -3   31.15    5.66
  -1   0  -2  103.92    8.15
  -1   0  -2  110.16    8.58
  -1   0  -2   97.89    8.44
  -1   0   2   19.92    3.91
  -1   0   3 2258.03   49.58
  -1   0   3 2289.44   42.65
  -1   0   4   -1.11    1.44
  -1   0   4   -1.52    2.78
  -1   0   5   15.45    4.93
  -1   0   5   22.81    5.71
  -1   0   6 1013.83   46.37
  -1   0   7  149.27   19.38
  -1   0   8  124.51   19.01
  -1   0   9   14.11    6.67
  -1   0  10   -4.76    6.48
  -1   0  11   -5.18    5.97
  -1   0  12   49.01   15.79
  -1   0  13   -7.94   11.76
  -1   0  13    4.32    4.90
  -1   0  14    4.09    9.52
  -1   0  14  -10.13    8.32
  -1   0  15   22.71   12.39
  -1   1 -11  133.16   24.35
  -1   1 -10    5.56    4.76
  -1   1  -9   12.47    6.75
  -1   1  -8  171.38   22.51
  -1   1  -7    6.56    4.20
  -1   1  -6   25.87    8.31
  -1   1  -5    9.18    5.18
  -1   1  -5    7.55    4.17
  -1   1  -4   -3.08    3.42
  -1   1  -4   -0.27    1.63
  -1   1  -3   12.14    4.77
  -1   1  -3   12.56    3.70
  -1   1  -2   55.71    7.64
  -1   1  -2   47.70    5.32
  -1   1  -1   51.23    4.26
  -1   1  -1   43.06    5.56
  -1   1   0 1549.07   29.15
  -1   1   1 1451.12   21.90
  -1   1   2   32.20    4.67
  -1   1   3  524.35   22.89
  -1   1   4 2369.69   55.72
  -1   1   5   33.77    7.08
  -1   1   6 1707.53   58.82
  -1   1   7  388.77   30.58
  -1   1   8  191.79   23.08
  -1   1   9  208.87   26.04
  -1   1  10   24.23   10.34
  -1   1  11   33.98   12.71
  -1   1  12   12.21    6.45
  -1   1  12    9.19    8.80
  -1   1  13   -6.30    9.34
  -1   1  13   -0.02    6.48
  -1   1  14    6.46    6.68
  -1   1  15    9.33    6.49
  -1   2 -12   -7.61    6.65
  -1   2 -11   32.89   12.67
  -1   2 -10   17.79    9.40
  -1   2  -9   39.21   13.26
  -1   2  -8  234.01   28.24
  -1   2  -7    2.24    3.51
  -1   2  -7    6.11    6.36
  -1   2  -6    9.75    4.11
  -1   2  -6    9.61    5.32
  -1   2  -5  186.79   21.57
  -1   2  -4    1.48    1.89
  -1   2  -4    0.35    1.09
  -1   2  -3  245.33   15.85
  -1   2  -3  238.58   20.06
  -1   2  -2   27.60    4.46
  -1   2  -2   21.22    5.59
  -1   2  -1    2.58    2.22
  -1   2  -1    1.88    0.88
  -1   2   0 1977.28   42.84
  -1   2   1  200.11   13.45
  -1   2   2  271.19   12.59
  -1   2   3   14.93    3.86
  -1   2   4  109.88   11.46
  -1   2   5   28.99    7.02
  -1   2   6  161.40   17.65
  -1   2   7  818.54   43.54
  -1   2   8    7.67    5.61
  -1   2   9  189.08   24.31
  -1   2  10   35.73   12.32
  -1   2  11   49.83   14.17
  -1   2  11   58.26   15.29
  -1   2  12   31.77   12.92
  -1   2  12   23.75   10.03
  -1   2  13   -0.33    3.18
  -1   2  13  -12.43    8.51
  -1   2  14    2.71    6.11
  -1   2  15  -11.29    8.94
  -1   3 -12    4.08    5.24
  -1   3 -11   36.44   14.51
  -1   3 -10   92.70   20.03
  -1   3  -9    4.76    4.46
  -1   3  -8   25.19    8.88
  -1   3  -8   40.17   12.50
  -1   3  -7   10.62    7.04
  -1   3  -7    2.43    2.57
  -1   3  -6   88.91   17.04
  -1   3  -5  891.54   49.49
  -1   3  -4    5.17    4.52
  -1   3  -4    8.15    3.43
  -1   3  -3   13.28    5.12
  -1   3  -3   22.57    4.95
  -1   3  -2  198.63   19.29
  -1   3  -2  224.47   13.34
  -1   3  -1  156.80    8.71
  -1   3  -1  169.94   16.43
  -1   3   0 1107.61   38.59
  -1   3   1   18.95    2.67
  -1   3   1   23.62    5.73
  -1   3   2  356.31   14.86
  -1   3   2  351.84   21.06
  -1   3   3  196.40   13.97
  -1   3   4   62.85    8.45
  -1   3   5   16.10    4.68
  -1   3   6  180.35   18.47
  -1   3   7  189.46   21.00
  -1   3   8  204.54   23.38
  -1   3   9   -7.09    6.40
  -1   3   9   -4.70    6.34
  -1   3  10  108.01   20.65
  -1   3  10   86.82   18.27
  -1   3  11   13.00    8.20
  -1   3  11   16.29    9.54
  -1   3  12    6.85    5.49
  -1   3  12   18.00    9.72
  -1   3  13   -3.50    6.21
  -1   3  14   -2.55    4.83
  -1   3  15   25.57   13.11
  -1   4 -13   -7.18    7.24
  -1   4 -12    9.58    8.42
  -1   4 -11   38.93   14.25
  -1   4 -10   10.47    7.36
  -1   4  -9   30.94   12.04
  -1   4  -8   31.95   11.79
  -1   4  -8   34.66   11.75
  -1   4  -7   67.11   16.16
  -1   4  -6   39.74   12.17
  -1   4  -5  315.55   31.79
  -1   4  -4  157.66   20.98
  -1   4  -3  173.32   14.53
  -1   4  -3  194.05   22.39
  -1   4  -2 1529.66   37.24
  -1   4  -2 1642.90   59.62
  -1   4  -1  358.93   15.08
  -1   4  -1  502.46   30.69
  -1   4   0   85.68   12.56
  -1   4   1   62.25    4.95
  -1   4   1   79.11   11.35
  -1   4   2   55.66    5.96
  -1   4   2   54.33    9.21
  -1   4   3  133.24   11.29
  -1   4   3  137.27   14.88
  -1   4   4  445.89   24.09
  -1   4   5  183.27   17.62
  -1   4   6  104.05   14.53
  -1   4   7   18.54    6.55
  -1   4   7    2.83    3.57
  -1   4   8   53.43   12.11
  -1   4   8   32.64    9.42
  -1   4   9   87.31   16.63
  -1   4   9   49.88   13.31
  -1   4  10   10.53    7.12
  -1   4  11   48.45   14.61
  -1   4  12   -5.20    9.89
  -1   4  13   60.62   16.71
  -1   4  14   11.34   10.35
  -1   4  15    1.63   10.68
  -1   5 -12   13.41    9.24
  -1   5 -11   39.21   16.14
  -1   5 -10    5.94    5.86
  -1   5  -9   28.14   12.41
  -1   5  -9   11.37    3.47
  -1   5  -8   57.58   17.48
  -1   5  -8   53.78   14.80
  -1   5  -7   95.38   20.83
  -1   5  -6   86.76   18.96
  -1   5  -5    5.43    5.11
  -1   5  -4  483.49   39.91
  -1   5  -3   78.95   15.75
  -1   5  -3   75.80    9.98
  -1   5  -2   39.93    6.29
  -1   5  -2   67.55   13.25
  -1   5  -1   52.86   11.37
  -1   5   0  456.34   31.37
  -1   5   1  468.31   14.44
  -1   5   1  624.96   35.40
  -1   5   2  425.27   16.72
  -1   5   2  451.43   29.27
  -1   5   3  242.83   15.50
  -1   5   3  219.33   20.69
  -1   5   4   21.82    5.40
  -1   5   4   13.69    5.30
  -1   5   5   49.51    9.10
  -1   5   6  637.77   35.46
  -1   5   7    1.80    3.19
  -1   5   8    3.36    3.29
  -1   5   9   52.95   12.82
  -1   5  10   -1.98    4.65
  -1   5  11   -8.97    9.70
  -1   5  12   87.12   19.93
  -1   5  13   10.78    8.19
  -1   5  14   18.45   10.83
  -1   5  15   29.88   13.98
  -1   5  16   11.56    9.24
  -1   6 -11   16.06   10.11
  -1   6 -10    4.68    5.63
  -1   6  -9    4.21    5.10
  -1   6  -9    8.16    7.47
  -1   6  -8   19.27    9.83
  -1   6  -8   15.26    8.69
  -1   6  -7   -3.47    6.76
  -1   6  -6    4.78    5.10
  -1   6  -5  218.08   30.01
  -1   6  -4    5.69    7.55
  -1   6  -3  151.84   14.80
  -1   6  -3  236.41   28.19
  -1   6  -2   42.29    6.95
  -1   6  -2   50.65   12.20
  -1   6  -1   47.38   11.75
  -1   6   0   91.92   15.73
  -1   6   1   13.49    6.73
  -1   6   2  166.08   10.71
  -1   6   2  172.75   20.11
  -1   6   3   51.80   10.79
  -1   6   3   51.97    7.21
  -1   6   4  970.95   35.63
  -1   6   4 1041.86   49.51
  -1   6   5    7.07    4.01
  -1   6   5   -0.31    4.49
  -1   6   6  417.41   29.06
  -1   6   7   -1.62    3.28
  -1   6   8  294.04   28.36
  -1   6   9  187.72   24.78
  -1   6  10   28.73   11.14
  -1   6  11    3.21    5.57
  -1   6  12   15.37    8.64
  -1   6  13    7.11    6.04
  -1   6  14   11.09    8.58
  -1   6  15   19.11   12.49
  -1   6  16    6.37    7.06
  -1   7 -10   -6.83    6.80
  -1   7  -9    1.43    4.25
  -1   7  -9   14.40    7.15
  -1   7  -8    6.80    6.94
  -1   7  -7   -0.17    5.67
  -1   7  -6  -12.48    8.20
  -1   7  -5   63.89   18.15
  -1   7  -4   -3.83    3.52
  -1   7  -3   15.30    5.05
  -1   7  -2   49.55   13.32
  -1   7  -1    9.82    5.17
  -1   7   0  404.98   35.06
  -1   7   1   56.10   12.83
  -1   7   2   58.37    6.55
  -1   7   2   63.67   13.49
  -1   7   3   72.83    8.56
  -1   7   3   69.06   13.81
  -1   7   4  264.67   18.79
  -1   7   4  320.63   29.25
  -1   7   5    1.69    2.65
  -1   7   5    1.79    2.32
  -1   7   6   93.58   13.58
  -1   7   6   81.01   15.45
  -1   7   7   74.65   13.62
  -1   7   7   80.03   15.44
  -1   7   8   91.49   16.35
  -1   7   9   86.95   17.41
  -1   7  10    0.05    4.70
  -1   7  11   32.32   11.54
  -1   7  12   60.58   16.61
  -1   7  13   13.57    9.85
  -1   7  14   12.95    9.00
  -1   7  15   16.17   11.94
  -1   7  16   -2.29    5.08
  -1   8 -10   20.76   11.61
  -1   8  -9   17.03   10.17
  -1   8  -8    3.52    5.38
  -1   8  -7   -6.10    6.62
  -1   8  -6   -7.74    6.97
  -1   8  -5   10.36    9.90
  -1   8  -4   24.33   11.40
  -1   8  -3   61.20   16.71
  -1   8  -2  417.63   41.24
  -1   8  -1   17.09    8.44
  -1   8   0   30.55   10.59
  -1   8   1   11.05    7.44
  -1   8   2    4.43    3.33
  -1   8   3   24.71    8.78
  -1   8   3   27.21    5.29
  -1   8   4  447.71   24.26
  -1   8   4  499.35   38.94
  -1   8   5  106.57   13.19
  -1   8   5  121.82   19.76
  -1   8   6   50.34   10.20
  -1   8   6   39.69   11.13
  -1   8   7   26.67    8.10
  -1   8   7   25.96    8.96
  -1   8   8   88.99   15.20
  -1   8   8   88.38   17.57
  -1   8   9   23.94   10.45
  -1   8  10   11.36    8.01
  -1   8  11    9.18    7.43
  -1   8  12    9.85    8.90
  -1   8  13    5.02    5.81
  -1   8  14   14.70   10.66
  -1   8  15   -2.04    4.58
  -1   8  16   -7.01    7.31
  -1   9  -7   12.64    9.01
  -1   9  -6    9.88    8.34
  -1   9  -5   10.28    9.35
  -1   9  -4   10.16   11.83
  -1   9  -3   88.03   21.85
  -1   9  -2   74.56   18.82
  -1   9  -1    1.49    5.30
  -1   9   0   83.59   18.03
  -1   9   1   90.23   18.80
  -1   9   2   -2.63    5.91
  -1   9   3  113.72   10.54
  -1   9   3  105.90   20.15
  -1   9   4    2.98    1.72
  -1   9   4    5.71    3.02
  -1   9   5    4.24    3.86
  -1   9   5    2.15    4.16
  -1   9   6  108.57   14.61
  -1   9   6  108.35   19.91
  -1   9   7   12.46    5.33
  -1   9   7   20.37    9.40
  -1   9   8   -4.61    4.19
  -1   9   8    0.55    3.56
  -1   9   9   11.47    6.40
  -1   9   9   -0.23    5.07
  -1   9  10   30.58   10.71
  -1   9  10   25.01   10.94
  -1   9  11   17.90    9.94
  -1   9  12   -6.99    6.04
  -1   9  13    5.56    5.70
  -1   9  14    4.40    3.92
  -1   9  15   12.22    9.69
  -1  10  -5   -5.53    6.49
  -1  10  -4    4.27    6.63
  -1  10  -3  104.41   24.22
  -1  10  -2   50.57   17.10
  -1  10  -1   45.00   14.31
  -1  10   0   43.39   14.79
  -1  10   1    4.07    7.50
  -1  10   2   39.47   13.17
  -1  10   3   16.64    9.97
  -1  10   4   72.15   16.91
  -1  10   5   13.97    4.55
  -1  10   5   29.80   10.48
  -1  10   6  245.84   22.07
  -1  10   6  305.68   34.85
  -1  10   7   19.93    6.71
  -1  10   7   28.81   11.19
  -1  10   8    4.81    6.44
  -1  10   8   -0.57    2.93
  -1  10   9   37.98   13.18
  -1  10   9   48.86   12.52
  -1  10  10   -2.46    5.26
  -1  10  10   -1.50    3.81
  -1  10  11    2.07    4.33
  -1  10  11    5.40    5.76
  -1  10  12    0.71    3.13
  -1  10  12    3.11    4.70
  -1  10  13    1.04    6.88
  -1  10  14   -0.38    2.98
  -1  10  15    0.32    6.72
  -1  11  -4    0.59    3.67
  -1  11  -3   21.01   11.74
  -1  11  -2    8.76    7.69
  -1  11  -1  -10.21    7.83
  -1  11   0   71.85   19.36
  -1  11   1   -0.50    4.12
  -1  11   2   99.97   22.04
  -1  11   3   51.10   15.37
  -1  11   4    9.94    6.89
  -1  11   5  126.40   23.79
  -1  11   6   10.75    6.15
  -1  11   7    8.96    7.92
  -1  11   8    5.22    5.01
  -1  11   8   -1.54    6.46
  -1  11   9   11.47    4.91
  -1  11   9   15.84    8.86
  -1  11  10    1.28    4.69
  -1  11  10   -4.04    4.34
  -1  11  11   10.34    7.74
  -1  11  11    2.61    4.37
  -1  11  12   13.03    7.81
  -1  11  12   28.08   14.17
  -1  11  13    3.12    6.83
  -1  11  13    1.94    5.24
  -1  11  14    1.74    4.09
  -1  11  14   -0.19    2.35
  -1  11  15    5.66   10.69
  -1  12  -2    9.14    8.32
  -1  12  -1    4.90    7.66
  -1  12   0    7.45    5.54
  -1  12   1   -1.84    6.00
  -1  12   2   22.90   11.46
  -1  12   3   43.10   14.96
  -1  12   4    9.20    7.11
  -1  12   5   40.38   14.91
  -1  12   6   22.75    8.70
  -1  12   7    0.15    3.67
  -1  12   8   28.50   12.74
  -1  12   9   23.10   12.33
  -1  12  10   20.79   12.11
  -1  12  11    7.25    6.48
  -1  12  11   20.30   11.33
  -1  12  12  -13.74    8.14
  -1  12  12   -2.77    4.30
  -1  12  13   -6.89    6.21
  -1  12  13  -12.79    9.05
  -1  12  14    0.80    3.70
  -1  12  15   11.91    5.97
  -1  13   0    0.67    3.46
  -1  13   1   12.00    9.02
  -1  13   2  -21.21   11.48
  -1  13   3   11.03    8.38
  -1  13   4   -0.86    3.27
  -1  13   5    7.87    7.20
  -1  13   6    7.11    6.92
  -1  13   7    0.62    3.26
  -1  13   8   26.72   14.15
  -1  13   9    5.91    6.35
  -1  13  10    9.48    6.97
  -1  13  11   16.06   10.93
  -1  13  12   18.10   10.80
  -1  14   4    9.58    8.23
  -1  14   5    5.00    6.15
  -1  14   6    2.23    4.78
  -1  14   7    0.73    5.24
  -1  14   8   -5.79    6.70
  -1  14   9   -0.69    3.21
   0 -10  -3  140.59   13.74
   0 -10  -2    0.40    1.62
   0  -9  -3   47.60    8.33
   0  -9  -3   50.36    8.31
   0  -9  -2    4.40    2.37
   0  -9  -2    4.72    2.03
   0  -9  -1   15.69    4.27
   0  -9   0  151.70   14.08
   0  -9   1    9.86    3.83
   0  -9   2   -0.12    1.73
   0  -8  -3   39.45    7.40
   0  -8  -2   49.18    7.85
   0  -8  -2   56.97    8.44
   0  -8  -1    8.38    3.57
   0  -8  -1   11.81    3.69
   0  -8   0   82.91    9.81
   0  -8   0  100.91   11.10
   0  -8   1    2.08    1.38
   0  -8   1    0.75    1.31
   0  -8   2   37.99    8.03
   0  -8   3   62.40   11.38
   0  -8   4   33.84    8.79
   0  -8   5   -1.85    3.41
   0  -7  -4   77.50   10.69
   0  -7  -3    0.22    1.06
   0  -7  -2  177.60   14.01
   0  -7  -2  203.95   15.03
   0  -7  -1  176.03   13.66
   0  -7  -1  172.42   13.27
   0  -7   0  189.28   14.22
   0  -7   0  191.86   14.48
   0  -7   1   10.36    3.42
   0  -7   1    9.36    3.55
   0  -7   2  165.82   14.93
   0  -7   2  200.58   17.73
   0  -7   3  105.36   13.61
   0  -7   4   -0.94    3.76
   0  -7   5    2.27    1.92
   0  -7   6   13.27    6.24
   0  -7   7    0.97    4.73
   0  -7   8   18.82    9.01
   0  -6  -4    5.42    2.22
   0  -6  -3 1020.71   34.42
   0  -6  -2  125.64   11.03
   0  -6  -1  119.12   10.37
   0  -6  -1  125.35   10.64
   0  -6   0   30.77    5.31
   0  -6   0   42.41    6.43
   0  -6   1  182.08   13.87
   0  -6   1  200.34   15.07
   0  -6   2  251.11   17.56
   0  -6   2  245.47   19.15
   0  -6   3  262.23   21.03
   0  -6   4  113.85   14.96
   0  -6   5   69.31   13.09
   0  -6   6    7.86    4.47
   0  -6   7   -5.85    4.41
   0  -6   8   18.67    9.41
   0  -6   9   35.97   12.19
   0  -6  10   18.81    8.56
   0  -5  -5    5.19    3.19
   0  -5  -4   24.94    5.87
   0  -5  -3  601.18   25.25
   0  -5  -2 1264.36   33.53
   0  -5  -1  726.76   23.47
   0  -5  -1  701.08   23.25
   0  -5   0 1712.43   37.69
   0  -5   0 1596.20   35.29
   0  -5   1    5.59    2.46
   0  -5   1    6.31    2.08
   0  -5   2  285.22   18.90
   0  -5   3  145.75   14.96
   0  -5   4    6.62    4.51
   0  -5   5   -1.26    3.33
   0  -5   6  209.61   23.63
   0  -5   7    6.71    5.41
   0  -5   8   15.52    7.73
   0  -5   9   57.15   15.37
   0  -5  10   -0.37    6.41
   0  -5  11   18.19    9.58
   0  -5  11   18.21   10.42
   0  -5  12   11.97   10.11
   0  -4  -5   12.53    4.62
   0  -4  -4    6.48    2.25
   0  -4  -4    4.74    3.14
   0  -4  -3  164.27   12.89
   0  -4  -2 1112.67   29.52
   0  -4  -2 1123.05   38.98
   0  -4  -1  938.60   35.76
   0  -4  -1  900.58   24.29
   0  -4   0    2.56    1.55
   0  -4   0    5.14    2.03
   0  -4   0    0.83    1.57
   0  -4   1  432.29   19.49
   0  -4   1  442.86   18.13
   0  -4   2   -0.86    1.67
   0  -4   3  283.28   20.00
   0  -4   4   28.15    7.46
   0  -4   5  147.56   17.57
   0  -4   6   82.23   13.88
   0  -4   7   15.40    7.40
   0  -4   8   31.85   10.98
   0  -4   9  147.18   23.65
   0  -4  10    5.37    4.97
   0  -4  11    3.11    3.50
   0  -4  11  -16.66    9.06
   0  -4  12    3.32    5.59
   0  -4  12    8.67    8.71
   0  -4  13  -13.56    9.08
   0  -3  -5    6.30    3.10
   0  -3  -4  215.14   15.98
   0  -3  -3  156.75   12.58
   0  -3  -2  249.35   13.10
   0  -3  -1  400.94   14.34
   0  -3  -1  385.74   19.64
   0  -3   0  239.50   10.91
   0  -3   0  223.84   10.31
   0  -3   0  237.13   16.31
   0  -3   1  269.83   19.40
   0  -3   1  247.08   13.00
   0  -3   2   35.01    5.75
   0  -3   3   12.85    4.25
   0  -3   4    3.50    3.38
   0  -3   5   -1.22    2.77
   0  -3   6  150.98   18.87
   0  -3   7  112.06   17.20
   0  -3   8   43.98   12.10
   0  -3   9  118.87   20.62
   0  -3  10    3.93    6.78
   0  -3  11   77.81   18.38
   0  -3  11   67.69   17.89
   0  -3  12    8.97    9.17
   0  -3  12   13.56   12.40
   0  -3  13    1.75    4.16
   0  -3  14    0.85    3.54
   0  -2  -5   84.30   11.38
   0  -2  -4  205.45   15.68
   0  -2  -3  264.13   15.33
   0  -2  -2    4.70    1.66
   0  -2  -1   74.94    5.51
   0  -2  -1   85.60    7.53
   0  -2   0  960.58   17.82
   0  -2   0  898.56   17.14
   0  -2   0  947.44   26.54
   0  -2   1  392.59   14.38
   0  -2   1  413.26   20.01
   0  -2   2  588.42   22.08
   0  -2   2  661.17   28.76
   0  -2   3  110.58   11.23
   0  -2   3   90.34   12.28
   0  -2   4    2.33    2.67
   0  -2   5    4.82    2.85
   0  -2   6  152.10   18.76
   0  -2   7   92.26   16.10
   0  -2   8   16.82    7.65
   0  -2   9   29.15   11.36
   0  -2  10   10.54    6.81
   0  -2  11   53.97   15.68
   0  -2  11   46.09   14.47
   0  -2  12   38.50   14.18
   0  -2  12   41.83   13.69
   0  -2  13    0.95    6.24
   0  -2  14   16.27   11.85
   0  -1  -4  220.71   16.47
   0  -1   2 1712.41   40.33
   0  -1   2 1616.82   34.31
   0  -1   3   14.77    4.61
   0  -1   3   14.85    4.34
   0  -1   4  800.07   33.23
   0  -1   5   68.11   10.80
   0  -1   6  178.71   19.42
   0  -1   7  125.48   17.45
   0  -1   8   19.01    8.20
   0  -1   9   76.88   16.35
   0  -1  10    8.09    7.41
   0  -1  11   47.61   14.90
   0  -1  11   42.88   14.49
   0  -1  12   10.88    5.52
   0  -1  12    4.37    8.28
   0  -1  13   -8.50    7.24
   0  -1  14   14.39    9.56
   0  -1  15    9.13    8.38
   0   0  -6  371.29   27.02
   0   0  -5  307.13   22.23
   0   0  -4  263.73   18.38
   0   0  -4  232.79   17.29
   0   0  -3   76.86    8.77
   0   0  -3   90.56    9.35
   0   0  -2  587.56   19.47
   0   0  -2  606.14   19.32
   0   0   2  603.94   19.71
   0   0   2  615.94   21.20
   0   0   2  615.09   19.59
   0   0   3   85.99    8.98
   0   0   3   80.18    9.36
   0   0   3   79.24    8.43
   0   0   4  234.54   17.71
   0   0   4  282.38   20.38
   0   0   4  285.36   18.60
   0   0   5  279.86   21.78
   0   0   5  286.54   20.89
   0   0   6  373.16   27.96
   0   0   7  324.80   28.29
   0   0   8   48.08   11.43
   0   0   9   54.59   13.87
   0   0  10   -0.21    3.68
   0   0  11   20.87    9.41
   0   0  11   20.99   11.39
   0   0  12   40.32   12.74
   0   0  12   47.10   15.49
   0   0  13   12.93    6.96
   0   0  14   -3.70    5.52
   0   0  15    9.91    8.35
   0   1  -9   70.41   14.81
   0   1  -8   24.16    8.59
   0   1  -7  128.60   17.52
   0   1  -6  167.02   18.75
   0   1  -5   69.11   10.67
   0   1  -4  824.82   33.48
   0   1  -4  868.81   34.30
   0   1  -4  843.90   37.63
   0   1  -3   12.48    3.60
   0   1  -3   12.98    4.50
   0   1  -2 1580.19   34.24
   0   1  -2 1730.32   40.80
   0   1   3 9999.00   95.57
   0   1   4  238.01   17.37
   0   1   4  249.63   17.28
   0   1   5  458.15   27.27
   0   1   5  437.12   25.90
   0   1   6   66.99   11.78
   0   1   7  123.35   17.15
   0   1   8  391.88   32.88
   0   1   9   52.16   12.51
   0   1  10    0.10    4.36
   0   1  10    7.20    4.91
   0   1  11   -0.54    3.07
   0   1  11   -4.77    5.67
   0   1  12    7.85    7.24
   0   1  13   -6.92    6.79
   0   1  14   -1.50    4.23
   0   1  15   -0.35    3.49
   0   2 -10   15.84    8.58
   0   2  -9   23.98    8.51
   0   2  -8   10.56    5.58
   0   2  -7  111.93   16.93
   0   2  -6  149.38   20.40
   0   2  -6  162.38   19.18
   0   2  -5    8.85    4.95
   0   2  -5   10.76    4.59
   0   2  -4    6.18    2.34
   0   2  -4    4.80    2.83
   0   2  -3  111.22   11.26
   0   2  -3   97.67   12.65
   0   2  -2  616.02   22.97
   0   2  -2  652.28   28.86
   0   2  -1  366.42   14.53
   0   2  -1  421.61   20.41
   0   2   0  921.90   26.68
   0   2   1   79.95    5.65
   0   2   1   83.37    7.29
   0   2   2    5.13    2.03
   0   2   3  273.28   16.01
   0   2   4  197.13   15.83
   0   2   4  198.78   15.46
   0   2   5  109.97   13.34
   0   2   5   87.44   11.76
   0   2   6 1594.00   56.38
   0   2   6 1554.98   54.50
   0   2   7   32.21    9.00
   0   2   7   22.71    7.48
   0   2   8  256.87   26.16
   0   2   8  285.40   27.79
   0   2   9   27.58   10.45
   0   2   9   43.50   12.73
   0   2  10    2.14    6.12
   0   2  10    3.26    3.40
   0   2  11  136.43   22.91
   0   2  12    5.51    5.31
   0   2  13  -10.02    7.61
   0   2  14    2.25    3.26
   0   2  15    9.09    7.87
   0   3 -11  106.29   21.93
   0   3 -10    0.12    2.49
   0   3  -9   94.73   19.07
   0   3  -8   68.32   15.07
   0   3  -7  113.39   20.34
   0   3  -7  128.76   19.12
   0   3  -6  150.38   21.70
   0   3  -6  155.88   19.49
   0   3  -5    5.27    4.14
   0   3  -4    1.90    3.36
   0   3  -3   13.71    5.61
   0   3  -3   10.64    3.46
   0   3  -2   24.29    6.85
   0   3  -2   29.63    5.37
   0   3  -1  240.08   13.19
   0   3  -1  256.57   18.59
   0   3   0  229.81   16.28
   0   3   1  351.04   13.54
   0   3   1  364.82   19.15
   0   3   2  247.50   13.15
   0   3   2  251.06   16.12
   0   3   3  159.70   12.53
   0   3   4  199.50   15.93
   0   3   5   10.29    4.71
   0   3   6  336.64   25.59
   0   3   7   14.89    6.84
   0   3   8  345.95   30.66
   0   3   9  301.59   30.90
   0   3  10    8.71    8.02
   0   3  11   16.82    7.40
   0   3  12    4.74    7.18
   0   3  13   18.46   10.11
   0   3  14   12.78   10.36
   0   3  15   29.63   14.46
   0   3  16    5.98    5.75
   0   4 -12   21.84   10.88
   0   4 -11    3.03    4.31
   0   4 -10  -13.46    7.95
   0   4  -9  188.97   27.06
   0   4  -8   43.25   14.66
   0   4  -8   15.09    7.45
   0   4  -7   11.45    6.39
   0   4  -7   21.16    7.07
   0   4  -6   75.25   16.42
   0   4  -5  169.34   23.49
   0   4  -4   21.70    8.79
   0   4  -3  282.76   19.92
   0   4  -3  297.82   26.44
   0   4  -2    3.88    2.09
   0   4  -2    3.14    2.58
   0   4  -1  424.31   19.37
   0   4  -1  454.24   28.49
   0   4   0    1.13    1.90
   0   4   1  891.59   23.20
   0   4   1  912.53   35.63
   0   4   2 1105.79   29.06
   0   4   2 1082.97   37.66
   0   4   3  176.27   13.36
   0   4   3  181.12   15.94
   0   4   4    4.97    3.14
   0   4   5    8.06    3.79
   0   4   6   41.32    9.35
   0   4   7   74.33   13.43
   0   4   8    3.50    2.90
   0   4   9  299.93   29.99
   0   4  10   11.71    5.49
   0   4  11  333.65   36.68
   0   4  12   15.69    8.84
   0   4  13    2.43    3.05
   0   4  14   17.52   11.99
   0   4  15    4.76    7.53
   0   4  16   13.76   11.12
   0   5 -11   13.53    9.63
   0   5 -10   21.26   10.12
   0   5  -9   46.78   14.17
   0   5  -8    9.41    7.17
   0   5  -8   16.79    7.38
   0   5  -7    3.24    5.08
   0   5  -6  226.42   30.02
   0   5  -5    3.25    3.10
   0   5  -4   -1.86    3.89
   0   5  -3  145.84   20.02
   0   5  -2  296.28   19.37
   0   5  -2  328.63   28.40
   0   5  -1    3.36    2.23
   0   5  -1    3.16    3.73
   0   5   0 1707.32   58.78
   0   5   1  681.03   22.09
   0   5   1  776.58   37.71
   0   5   2 1259.70   32.77
   0   5   2 1228.93   45.00
   0   5   3  607.68   25.86
   0   5   3  603.30   31.98
   0   5   4   23.17    5.27
   0   5   4   28.48    6.41
   0   5   5    5.93    3.75
   0   5   6  160.78   17.69
   0   5   7   71.82   13.25
   0   5   8   72.42   14.11
   0   5   9  130.09   20.41
   0   5  10    7.54    5.43
   0   5  11   24.54    9.56
   0   5  12   48.36   14.98
   0   5  13   -6.07    5.33
   0   5  14   51.86   16.74
   0   5  15   13.73   10.37
   0   5  16    1.19    5.02
   0   6 -10   28.40   11.97
   0   6  -9   10.72    6.86
   0   6  -9   26.91   12.08
   0   6  -8   20.20    9.34
   0   6  -8   14.90    6.54
   0   6  -7   -2.27    3.38
   0   6  -6   -2.35    5.66
   0   6  -5  120.61   22.00
   0   6  -4  106.82   20.03
   0   6  -3  259.81   28.88
   0   6  -2  241.34   19.02
   0   6  -2  317.96   30.64
   0   6  -1  212.96   24.17
   0   6   0   41.05   10.63
   0   6   1  128.96   16.85
   0   6   1  109.80    9.56
   0   6   2  116.51   10.62
   0   6   2  123.37   15.92
   0   6   3 1020.45   34.16
   0   6   3 1099.37   46.64
   0   6   4    1.92    1.90
   0   6   4   -0.84    2.76
   0   6   5   34.60    7.81
   0   6   5   38.57    9.10
   0   6   6   16.26    5.69
   0   6   7    4.62    2.70
   0   6   8   79.75   14.71
   0   6   9   22.58    8.08
   0   6  10   12.25    6.39
   0   6  11   82.29   18.23
   0   6  12   17.86    9.96
   0   6  13    1.34    2.96
   0   6  14   18.61   11.25
   0   6  15    3.08    5.27
   0   6  16    4.95    6.24
   0   7 -10    2.52    7.85
   0   7  -9   35.85   15.35
   0   7  -9   18.95   10.52
   0   7  -8   20.94   12.50
   0   7  -8   -3.85    4.76
   0   7  -7   -4.68    5.46
   0   7  -6   14.47    7.98
   0   7  -5    2.37    3.27
   0   7  -4    7.89    6.53
   0   7  -3   90.71   18.74
   0   7  -2  184.78   25.08
   0   7  -1   10.10    5.69
   0   7   0  188.90   23.57
   0   7   1  178.57   21.88
   0   7   2  185.87   13.91
   0   7   2  205.14   22.63
   0   7   3    0.98    1.91
   0   7   3   -1.26    5.05
   0   7   4   73.05   10.49
   0   7   4   78.83   14.02
   0   7   5    6.49    3.96
   0   7   5   10.64    4.99
   0   7   6  204.14   20.88
   0   7   6  168.35   21.77
   0   7   7   73.86   13.48
   0   7   8   94.34   17.26
   0   7   9   -2.87    6.11
   0   7  10   11.95    5.00
   0   7  11   17.90    8.60
   0   7  12   20.29   10.14
   0   7  13    6.46    5.66
   0   7  14   15.22    9.59
   0   7  15   -4.39    5.87
   0   7  16  -14.37   10.03
   0   8  -9    3.98    5.25
   0   8  -8   -7.92    7.68
   0   8  -8   -5.22    5.58
   0   8  -7   -0.95    7.58
   0   8  -6   -8.11    7.05
   0   8  -5    4.95    6.71
   0   8  -4   47.52   14.95
   0   8  -3   84.38   19.14
   0   8  -2   23.69    8.40
   0   8  -1    9.35    7.49
   0   8   0   65.28   15.05
   0   8   1    6.29    6.24
   0   8   2   58.19    8.15
   0   8   2   79.55   15.19
   0   8   3   34.04    6.83
   0   8   3   59.36   13.32
   0   8   4   44.48    8.41
   0   8   4   41.92   10.85
   0   8   5  144.12   20.32
   0   8   5  135.91   15.61
   0   8   6   59.57   11.47
   0   8   6   69.02   15.03
   0   8   7    5.25    3.78
   0   8   7    0.91    2.13
   0   8   8   59.49   13.73
   0   8   8   35.32   10.16
   0   8   9   66.40   15.26
   0   8  10    0.23    4.17
   0   8  11   65.14   15.81
   0   8  12   10.97    8.36
   0   8  13   -1.60    4.18
   0   8  14   18.74   11.18
   0   8  15   -1.29    4.14
   0   8  16  -14.62   10.07
   0   9  -8   17.94   10.00
   0   9  -7    9.06    8.19
   0   9  -6   40.20   15.28
   0   9  -5   -2.36    4.36
   0   9  -4   45.96   15.57
   0   9  -3   -6.32    6.73
   0   9  -2    2.21    4.71
   0   9  -1    2.21    4.01
   0   9   0  158.02   24.40
   0   9   1   18.99    9.16
   0   9   2   19.65    9.15
   0   9   3   62.94   14.54
   0   9   3   50.75    8.38
   0   9   4   12.90    4.40
   0   9   4   20.80    7.90
   0   9   5  377.94   26.51
   0   9   5  397.19   35.85
   0   9   6    5.06    5.64
   0   9   6    6.08    3.85
   0   9   7   20.11    6.92
   0   9   7   21.23    8.75
   0   9   8    6.49    4.22
   0   9   8    4.57    2.97
   0   9   9   41.54   11.97
   0   9   9   31.03   11.26
   0   9  10   -0.88    3.69
   0   9  11  105.76   20.72
   0   9  12   33.81   12.60
   0   9  13    8.43    6.87
   0   9  14    3.55    4.92
   0   9  15    2.13    6.84
   0   9  16   -0.03    7.00
   0  10  -6   71.82   23.05
   0  10  -5   12.33    9.08
   0  10  -4   12.65    8.88
   0  10  -3   14.47    7.45
   0  10  -2   26.67   12.50
   0  10  -1   79.14   19.13
   0  10   0   13.37    7.20
   0  10   1    0.95    3.62
   0  10   2    5.60    5.40
   0  10   3  113.36   12.56
   0  10   3  137.45   23.25
   0  10   4   11.32    4.74
   0  10   4    0.89    3.77
   0  10   5   -2.19    4.00
   0  10   5    3.56    3.99
   0  10   6  266.56   24.20
   0  10   6  269.84   31.52
   0  10   7   12.58    6.58
   0  10   7   21.64    9.23
   0  10   8   16.40    6.42
   0  10   8   24.41   10.16
   0  10   9   -3.91    4.91
   0  10   9   -3.04    5.95
   0  10  10    0.03    2.29
   0  10  10    6.72    4.27
   0  10  11   -5.66    5.32
   0  10  11   10.94    6.92
   0  10  12   11.23    9.08
   0  10  13    7.04    6.05
   0  10  14    0.02   11.58
   0  10  15   -0.42    3.24
   0  10  16    3.44    5.53
   0  11  -4   -0.68    3.78
   0  11  -3   27.90   12.05
   0  11  -2   -1.53    3.95
   0  11  -1   76.66   19.85
   0  11   0   31.24   14.20
   0  11   1   40.71   13.90
   0  11   2   35.06   13.35
   0  11   3   11.46    8.47
   0  11   4   -8.10    7.67
   0  11   5   38.27    8.47
   0  11   5   57.27   15.64
   0  11   6   20.95    6.84
   0  11   6   25.20    9.85
   0  11   7   30.78    8.79
   0  11   7   16.66    8.50
   0  11   8   -0.49    2.07
   0  11   8    2.70    3.92
   0  11   9   37.42   10.97
   0  11   9   55.08   15.94
   0  11  10   -3.87    4.44
   0  11  10    1.46    5.10
   0  11  11   64.99   17.28
   0  11  11   61.04   17.58
   0  11  12   -0.10    5.15
   0  11  12    1.69    3.62
   0  11  13   -2.60    4.54
   0  11  13   22.04   12.50
   0  11  14   10.76    7.95
   0  11  14  -14.05    9.27
   0  11  15    2.86    7.03
   0  12  -3   31.62   18.35
   0  12  -2   10.34    8.46
   0  12  -1   22.86   11.88
   0  12   0   51.68   18.06
   0  12   1   16.83    8.11
   0  12   2   47.24   16.53
   0  12   3   38.53   14.30
   0  12   4   21.80   11.36
   0  12   5   20.60    9.22
   0  12   6   14.27    8.82
   0  12   7    1.75    5.22
   0  12   8    8.03    7.11
   0  12   8    1.85    3.10
   0  12   9   27.52    9.24
   0  12   9   17.97    9.05
   0  12  10   -6.55    5.19
   0  12  10  -16.28    9.20
   0  12  11   -8.64    7.01
   0  12  11   -0.02    3.09
   0  12  12    7.89    6.54
   0  12  12   -4.28    5.37
   0  12  13    0.96    3.44
   0  12  13   -8.10    7.12
   0  12  14    4.13    8.79
   0  12  14    5.73    6.37
   0  12  15   -3.60    5.48
   0  13  -1   -2.02    5.56
   0  13   0   36.47   14.67
   0  13   1  -14.36    9.55
   0  13   2   12.86    9.28
   0  13   3   11.70    8.30
   0  13   4    3.00    4.42
   0  13   5   92.56   22.16
   0  13   6  -11.45    8.30
   0  13   7   -0.44    2.70
   0  13   8   17.75   10.07
   0  13   9   24.92   11.33
   0  13  10   14.97    9.73
   0  13  11   25.47   11.98
   0  13  12    4.82    4.58
   0  13  12   10.49    7.97
   0  13  13  -21.02   11.57
   0  13  13   -3.22    4.51
   0  13  14    4.56    5.65
   0  13  15    8.16    7.31
   0  14   2   22.76   12.24
   0  14   3   28.72   13.76
   0  14   4   10.05    8.08
   0  14   5   45.78   17.41
   0  14   6    4.52    6.24
   0  14   7   -4.78    5.94
   0  14   8   17.37   10.04
   0  14   9   17.53   10.65
   0  14  10   19.91   10.79
   0  14  11    6.59    6.73
   0  14  12    6.16    7.98
   0  15   7    4.16    5.76
   1  -9  -3   89.32    8.89
   1  -8  -5   99.77   11.62
   1  -8  -4  442.22   22.07
   1  -8  -3   38.36    5.69
   1  -8  -2    2.70    1.93
   1  -8  -2    2.24    1.63
   1  -8  -1    4.19    1.70
   1  -8  -1   11.14    2.53
   1  -8   0   30.95    4.69
   1  -8   1    3.93    1.68
   1  -8   2  367.16   21.23
   1  -7  -5    0.59    1.81
   1  -7  -4  269.08   17.28
   1  -7  -3   79.83    8.23
   1  -7  -2   45.37    5.71
   1  -7  -2   58.68    6.92
   1  -7  -1   43.81    5.04
   1  -7  -1   41.69    5.00
   1  -7   0  307.26   13.49
   1  -7   0  360.21   15.13
   1  -7   1   15.60    3.49
   1  -7   1    6.92    2.26
   1  -7   2   28.18    5.03
   1  -7   2   40.55    6.55
   1  -7   3   16.33    5.19
   1  -7   4   -0.22    1.61
   1  -7   5   82.08   13.52
   1  -6  -5    1.36    2.58
   1  -6  -4  974.55   32.69
   1  -6  -3   53.93    6.61
   1  -6  -2  175.89   11.41
   1  -6  -1    7.10    1.90
   1  -6  -1    6.53    1.87
   1  -6   0   80.50    6.32
   1  -6   0   81.41    6.64
   1  -6   1   47.62    5.57
   1  -6   1   52.68    6.52
   1  -6   2   50.90    6.39
   1  -6   2   68.30    8.58
   1  -6   3  161.61   13.22
   1  -6   3  192.80   16.66
   1  -6   4    6.88    4.33
   1  -6   5  218.19   21.75
   1  -6   6   -1.07    2.85
   1  -6   7    4.25    4.02
   1  -6   8   15.00    7.54
   1  -5  -5   63.87    9.33
   1  -5  -4   25.17    5.30
   1  -5  -3  226.83   13.51
   1  -5  -1  551.56   15.70
   1  -5  -1  425.74   13.35
   1  -5   0  331.30   12.18
   1  -5   0  423.11   13.51
   1  -5   1   44.22    4.93
   1  -5   1   48.20    5.71
   1  -5   2   45.68    5.92
   1  -5   2   48.94    6.86
   1  -5   3   75.19    9.82
   1  -5   4  490.20   28.62
   1  -5   5    5.56    3.00
   1  -5   6  100.64   15.98
   1  -5   7   67.05   14.34
   1  -5   8   56.60   13.02
   1  -5   8   50.07   13.94
   1  -5   9   22.79    8.56
   1  -5   9   22.80   11.45
   1  -4  -5  183.85   16.29
   1  -4  -4  454.53   22.62
   1  -4  -3  137.78   10.48
   1  -4  -2   49.26    5.09
   1  -4  -1   73.51    5.27
   1  -4   0   81.00    4.98
   1  -4   1  363.40   12.85
   1  -4   1  429.14   15.75
   1  -4   2 1586.53   37.74
   1  -4   3  176.86   14.78
   1  -4   4  168.26   16.19
   1  -4   5  276.00   23.12
   1  -4   6   45.46   10.71
   1  -4   7   56.33   12.46
   1  -4   8   32.67    9.37
   1  -4   8   30.94    9.92
   1  -4   9   39.43   11.41
   1  -4   9   44.11   13.38
   1  -4  10    5.29    5.43
   1  -4  10   10.33    4.71
   1  -4  11   32.39   11.64
   1  -3  -5   20.19    5.82
   1  -3  -4   61.41    8.46
   1  -3  -3  211.81   13.25
   1  -3  -2  358.18   13.73
   1  -3  -1   24.89    5.50
   1  -3   0 1065.94   37.01
   1  -3   1  184.47    9.35
   1  -3   1  185.55   16.63
   1  -3   2  223.53   13.15
   1  -3   3   19.69    4.99
   1  -3   4    7.02    3.11
   1  -3   5  842.57   39.35
   1  -3   6   98.16   14.86
   1  -3   7   17.59    8.52
   1  -3   8   33.37   10.05
   1  -3   8   54.68   12.71
   1  -3   9    7.54    5.74
   1  -3   9    9.02    6.40
   1  -3  10   94.33   19.35
   1  -3  10  105.18   19.42
   1  -3  11   20.79    9.22
   1  -3  12    1.21    3.76
   1  -3  13    0.05    2.45
   1  -2  -9  131.49    8.84
   1  -2  -4  104.33   11.17
   1  -2  -3   20.56    4.40
   1  -2  -2  292.42   12.73
   1  -2  -1  180.22   12.75
   1  -2   0 1841.32   41.62
   1  -2   1    2.39    1.12
   1  -2   1    1.21    2.43
   1  -2   2   35.68    5.07
   1  -2   2   28.34    6.41
   1  -2   3  277.42   16.90
   1  -2   4    1.99    2.76
   1  -2   5  227.50   20.53
   1  -2   6   11.74    5.31
   1  -2   7    6.34    1.99
   1  -2   7   11.05    6.24
   1  -2   8  259.43   26.84
   1  -2   8  246.74   27.20
   1  -2   9   62.28   13.92
   1  -2   9   51.38   13.48
   1  -2  10   30.76   10.59
   1  -2  10    8.96    3.47
   1  -2  11   16.94    8.12
   1  -2  12   26.27   12.75
   1  -2  13   -1.50    3.82
   1  -2  14   17.36   10.20
   1  -2  15   14.52    9.84
   1  -1  -7  275.60   11.31
   1  -1  -4 2367.24   55.16
   1  -1  -3  554.62   23.18
   1  -1  -2   33.33    4.56
   1  -1  -1 1390.85   22.26
   1  -1   0 1568.07   29.58
   1  -1   1   38.34    5.64
   1  -1   2   62.27    5.91
   1  -1   2   52.17    5.92
   1  -1   2   61.56    7.84
   1  -1   3    7.55    3.85
   1  -1   3    8.74    3.26
   1  -1   4    2.48    2.95
   1  -1   5   16.46    5.31
   1  -1   6   16.79    2.77
   1  -1   6   16.40    5.63
   1  -1   7    2.89    2.85
   1  -1   7    8.11    5.58
   1  -1   8  163.73   21.04
   1  -1   8  150.70   21.12
   1  -1   9   45.28   12.28
   1  -1   9   41.61   12.31
   1  -1  10    6.79    6.34
   1  -1  11  124.52   22.34
   1  -1  12   -1.16    3.61
   1  -1  13   -7.39    6.65
   1  -1  14   17.06   10.50
   1  -1  15    0.16    5.51
   1   0  -4    0.47    0.55
   1   0  -4    0.58    1.38
   1   0  -3 2318.16   49.97
   1   0  -3 2318.47   30.75
   1   0  -2   23.60    2.98
   1   0  -2   19.58    3.90
   1   0   2  111.32    8.16
   1   0   2  112.78    6.84
   1   0   2  111.30    8.91
   1   0   3   35.54    6.30
   1   0   3   32.09    5.70
   1   0   3   33.99    3.72
   1   0   4  158.48   14.20
   1   0   4  150.11    7.82
   1   0   4  153.56   14.09
   1   0   4  169.42   15.43
   1   0   5  255.36   20.42
   1   0   5  312.56   22.76
   1   0   6   56.98   10.68
   1   0   6   49.72   10.39
   1   0   7    0.83    4.32
   1   0   7   -2.47    3.46
   1   0   8  231.53   25.57
   1   0   8  221.89   25.22
   1   0   9   70.17   15.69
   1   0   9   62.67   13.11
   1   0  10    2.24    3.99
   1   0  11    8.66    4.33
   1   0  12   -0.06    4.02
   1   0  13   20.23   12.66
   1   0  14   22.09   11.95
   1   0  15   -2.67    4.93
   1   1  -5   83.40   10.98
   1   1  -4  517.58   27.95
   1   1  -4  509.83   24.38
   1   1  -3  218.47   16.34
   1   1  -3  220.16   13.65
   1   1  -2 2689.32   49.63
   1   1  -2 2712.56   37.06
   1   1  -1  143.44    9.29
   1   1   2   96.44    7.89
   1   1   2   86.17    8.00
   1   1   3  245.60   15.09
   1   1   3  233.37   15.54
   1   1   4   28.51    6.13
   1   1   4   31.24    6.55
   1   1   5  210.50   18.18
   1   1   5  212.35   18.47
   1   1   6   37.23    9.00
   1   1   7  374.33   29.92
   1   1   8    1.81    6.05
   1   1   9   18.47    6.11
   1   1  10    6.26    6.82
   1   1  11   47.13   14.13
   1   1  12    4.75    6.94
   1   1  13   38.35   13.36
   1   1  14   13.00   11.48
   1   1  15   11.38    8.81
   1   2  -8   -2.74    2.78
   1   2  -7  100.49   15.60
   1   2  -6  136.11   16.27
   1   2  -5   11.44    4.73
   1   2  -4   -2.46    3.61
   1   2  -4    1.61    1.46
   1   2  -3   -0.78    2.39
   1   2  -3    5.13    2.45
   1   2  -2  637.24   26.08
   1   2  -2  590.01   26.87
   1   2  -1 1524.33   35.20
   1   2  -1 1473.81   35.73
   1   2   0 2181.08   34.80
   1   2   0 2086.61   34.93
   1   2   1    7.55    2.32
   1   2   2  245.30   13.58
   1   2   3 2079.88   46.17
   1   2   4  135.03   13.25
   1   2   4  147.35   13.91
   1   2   5 1491.88   48.73
   1   2   5 1544.71   50.37
   1   2   6  111.50   14.44
   1   2   7   33.07    9.34
   1   2   8  352.27   30.61
   1   2   9   54.28   13.36
   1   2  10   11.92    7.38
   1   2  11    6.83    5.55
   1   2  12    2.62    4.87
   1   2  13   10.77    8.52
   1   2  14   40.00   14.14
   1   2  15   -5.24    6.21
   1   2  16   13.73    9.60
   1   3  -9  113.22   19.40
   1   3  -8    7.59    4.82
   1   3  -7   89.16   14.51
   1   3  -6    4.81    4.15
   1   3  -6    5.59    3.44
   1   3  -5  165.47   21.11
   1   3  -5  185.60   18.24
   1   3  -4  650.62   38.61
   1   3  -3  190.54   16.99
   1   3  -3  213.68   20.02
   1   3  -2 1143.08   37.20
   1   3  -2 1093.22   41.22
   1   3  -1  709.35   26.28
   1   3  -1  679.03   29.27
   1   3   0   91.76    8.18
   1   3   0   89.63    9.32
   1   3   1 1700.59   35.41
   1   3   1 1736.22   36.80
   1   3   2 4901.11   64.12
   1   3   2 4675.71   60.66
   1   3   3 8641.79   95.96
   1   3   4  398.71   23.06
   1   3   5  322.13   22.95
   1   3   6  287.16   23.32
   1   3   7   83.76   13.89
   1   3   8  370.23   30.87
   1   3   9  160.27   22.25
   1   3  10   31.28   12.25
   1   3  11   72.07   16.57
   1   3  12   -8.80    6.48
   1   3  13   13.65    6.29
   1   3  14   27.08   14.03
   1   3  15   -6.27    6.66
   1   3  16    2.38    5.21
   1   4 -10   16.09    8.29
   1   4  -9  100.79   18.86
   1   4  -8    7.73    3.38
   1   4  -7  130.65   22.81
   1   4  -7  131.63   19.15
   1   4  -6  194.82   25.95
   1   4  -6  193.35   21.22
   1   4  -5  240.79   27.12
   1   4  -4  293.99   27.58
   1   4  -3   11.60    5.97
   1   4  -2    1.20    2.82
   1   4  -2    2.03    1.28
   1   4  -1 2460.79   53.48
   1   4  -1 2466.96   62.16
   1   4   0    0.13    1.33
   1   4   1   54.43    6.91
   1   4   1   57.39    8.30
   1   4   2 1070.41   32.32
   1   4   2 1035.61   33.64
   1   4   3  665.61   28.29
   1   4   3  713.41   28.92
   1   4   4  831.26   34.46
   1   4   5 1234.11   45.43
   1   4   6  564.18   33.74
   1   4   7    1.88    2.66
   1   4   8   22.37    8.35
   1   4   9    7.67    3.31
   1   4  10   -7.21    7.52
   1   4  11  346.73   36.78
   1   4  12    5.34    3.69
   1   4  13   22.54   10.28
   1   4  14   40.92   16.07
   1   4  15   11.42    8.57
   1   4  16   16.03    8.87
   1   5 -10    9.03    6.37
   1   5  -9   92.86   18.93
   1   5  -8   38.72   11.22
   1   5  -7    2.27    4.02
   1   5  -7   -0.53    2.32
   1   5  -6  335.36   36.01
   1   5  -5   49.05   12.09
   1   5  -4  130.03   19.37
   1   5  -3  747.00   44.58
   1   5  -2  582.61   29.79
   1   5  -2  653.02   38.61
   1   5  -1  191.41   15.97
   1   5  -1  200.87   20.08
   1   5   0  115.12   14.21
   1   5   1   15.00    4.03
   1   5   1   18.29    5.65
   1   5   2  941.86   32.21
   1   5   2  989.30   37.77
   1   5   3   51.44    8.01
   1   5   3   52.03    8.77
   1   5   4   12.32    4.70
   1   5   4    6.05    2.98
   1   5   5   83.70   12.09
   1   5   6    5.91    4.63
   1   5   7  887.90   45.67
   1   5   8    1.62    3.31
   1   5   9  122.97   19.28
   1   5  10   93.04   17.46
   1   5  11  -13.08    8.18
   1   5  12    4.66    4.11
   1   5  13   14.34    8.77
   1   5  14   58.06   18.08
   1   5  15    5.57    7.20
   1   5  16   12.47   10.11
   1   6  -9   17.06    9.05
   1   6  -8   15.01   10.11
   1   6  -8    4.22    3.06
   1   6  -7   49.31   15.27
   1   6  -7   31.42    9.81
   1   6  -6    3.60    4.48
   1   6  -5   62.68   15.44
   1   6  -4   45.76   12.99
   1   6  -3  204.08   25.06
   1   6  -2   31.03    9.12
   1   6  -1   73.89   13.20
   1   6   0  307.64   25.70
   1   6   1  200.16   15.17
   1   6   1  219.71   21.08
   1   6   2    8.71    3.27
   1   6   2    4.41    2.22
   1   6   3  160.14   14.73
   1   6   3  147.46   16.24
   1   6   4   97.71   12.64
   1   6   4  109.19   14.17
   1   6   5  628.62   34.44
   1   6   5  656.67   36.26
   1   6   6   91.32   13.66
   1   6   7   19.60    7.50
   1   6   8   23.83    8.07
   1   6   9    7.32    4.08
   1   6  10  250.10   29.63
   1   6  11   17.76    8.63
   1   6  12   55.83   15.52
   1   6  13   17.04    9.56
   1   6  14   -6.75    6.59
   1   6  15    8.50    9.14
   1   6  16    5.08    6.05
   1   7  -9    9.42    5.42
   1   7  -8  -12.03    8.67
   1   7  -8   -2.46    6.33
   1   7  -7   15.01   11.31
   1   7  -6   57.70   16.23
   1   7  -5    3.91    5.74
   1   7  -4  143.27   23.85
   1   7  -3    8.35    7.00
   1   7  -2    0.36    4.51
   1   7  -1   33.45   10.14
   1   7   0   48.49   11.05
   1   7   1    3.10    6.02
   1   7   2   27.73    6.29
   1   7   2   31.55    8.61
   1   7   3    0.48    1.27
   1   7   3   -2.02    4.21
   1   7   4  269.97   21.23
   1   7   4  279.92   24.59
   1   7   5  667.12   35.11
   1   7   5  712.27   40.07
   1   7   6   15.18    6.09
   1   7   6   15.95    6.32
   1   7   7    9.81    5.50
   1   7   8  124.93   18.90
   1   7   9   15.79    7.84
   1   7  10   39.77   12.50
   1   7  11   27.71   10.25
   1   7  12   11.46    8.92
   1   7  13   50.66   15.90
   1   7  14    5.32    3.45
   1   7  15   26.10   15.15
   1   7  16   20.23   11.64
   1   8  -8   11.64    8.97
   1   8  -8  -11.04    7.35
   1   8  -7   41.91   16.22
   1   8  -6   22.55   13.05
   1   8  -5   14.80    9.69
   1   8  -4   71.40   17.99
   1   8  -3    2.40    3.40
   1   8  -2   -0.58    3.71
   1   8  -1  152.98   23.28
   1   8   0   33.38   10.11
   1   8   1    7.82    6.16
   1   8   2   30.67    6.45
   1   8   2   39.73    9.94
   1   8   3   37.77    7.62
   1   8   3   22.53    7.18
   1   8   4  404.07   26.50
   1   8   4  442.43   33.57
   1   8   5  359.37   26.63
   1   8   5  387.72   31.42
   1   8   6   35.82    9.11
   1   8   6   30.11    9.35
   1   8   7   -2.77    4.88
   1   8   7   -2.59    4.60
   1   8   8   92.04   16.44
   1   8   8   90.76   16.46
   1   8   9   -3.12    4.32
   1   8  10    4.49    5.09
   1   8  11   68.71   17.54
   1   8  12    4.58    5.56
   1   8  13    8.68    3.61
   1   8  14   16.85    9.19
   1   8  15    0.23    3.14
   1   8  16    0.03    6.51
   1   9  -7   12.36    9.24
   1   9  -6   58.13   19.25
   1   9  -5    6.37    5.70
   1   9  -4   42.39   14.46
   1   9  -3   27.21   11.05
   1   9  -2   51.28   14.77
   1   9  -1   84.66   18.51
   1   9   0   -3.01    2.91
   1   9   1    7.73    4.25
   1   9   2   93.12   12.11
   1   9   2   84.60   16.67
   1   9   3   28.98    6.74
   1   9   3   33.74   10.84
   1   9   4   -4.68    4.01
   1   9   4    0.03    2.22
   1   9   5  228.85   21.89
   1   9   5  256.36   27.83
   1   9   6   35.33    9.69
   1   9   6   30.63   10.19
   1   9   7   24.80    7.82
   1   9   7   26.74    9.16
   1   9   8   13.43    5.62
   1   9   8   15.96    7.30
   1   9   9    2.10    3.16
   1   9   9   -3.63    7.48
   1   9  10    0.53    3.22
   1   9  11   52.75   14.31
   1   9  12    1.85    3.68
   1   9  13   52.50   16.76
   1   9  14   10.78    9.90
   1   9  15   16.25   10.55
   1   9  16   -5.79    6.70
   1  10  -6   38.72   17.57
   1  10  -5    5.13    6.21
   1  10  -4   36.27   14.70
   1  10  -3   10.16    6.99
   1  10  -2    0.40    3.81
   1  10  -1   46.11   12.95
   1  10   0   69.83   17.26
   1  10   1   26.73    9.86
   1  10   2   38.32   12.93
   1  10   3   46.04    9.07
   1  10   3   40.46   12.43
   1  10   4   30.84    7.25
   1  10   4   29.78    9.46
   1  10   5   23.10    7.12
   1  10   5   26.06    8.29
   1  10   6    0.81    4.10
   1  10   6   16.86    9.91
   1  10   7   13.11    5.99
   1  10   7   15.51    7.80
   1  10   8   20.27    8.48
   1  10   8    6.88    3.69
   1  10   9   30.19   10.16
   1  10   9   31.34   10.77
   1  10  10    5.05    4.63
   1  10  10    6.07    2.72
   1  10  11   25.95   10.36
   1  10  11   32.39   12.42
   1  10  12   -0.62    4.73
   1  10  13   -3.17    4.89
   1  10  14    5.60    5.89
   1  10  15    1.81    4.41
   1  10  16    5.40    9.03
   1  11  -5    3.22    5.58
   1  11  -4   24.57   13.41
   1  11  -3   11.50    8.46
   1  11  -2   17.85   11.82
   1  11  -1   18.74    8.72
   1  11   0    2.31    5.11
   1  11   1    5.89    7.36
   1  11   2   21.71    8.64
   1  11   3   54.02   14.80
   1  11   4    1.30    2.63
   1  11   4   -1.82    4.84
   1  11   5   86.47   13.58
   1  11   5   77.76   17.03
   1  11   6   49.99   11.21
   1  11   6   43.17   11.98
   1  11   7   32.14    9.76
   1  11   7   31.12   10.78
   1  11   8   11.86    5.63
   1  11   8    6.99    5.49
   1  11   9    8.10    6.92
   1  11   9    1.87    3.56
   1  11  10    7.02    5.57
   1  11  10   27.47   10.66
   1  11  11    8.95    5.91
   1  11  11    0.52    3.90
   1  11  12    0.30    2.79
   1  11  12    1.92    3.28
   1  11  13   13.52    6.80
   1  11  13    0.09    4.58
   1  11  14    1.33    3.92
   1  11  15    8.60    7.50
   1  11  16   13.23   11.15
   1  12  -3   -0.20    3.15
   1  12  -2   -7.39    9.03
   1  12  -1   10.61    5.47
   1  12   0   -4.58    5.40
   1  12   1    7.72    7.54
   1  12   2   35.29   12.79
   1  12   3   73.24   18.40
   1  12   4   27.52   11.73
   1  12   5    0.21    1.79
   1  12   5    3.83    3.32
   1  12   6   23.36    7.84
   1  12   6   10.94    7.05
   1  12   7    5.09    3.36
   1  12   7    7.94    6.05
   1  12   8   22.47    8.91
   1  12   8   37.29   13.23
   1  12   9    3.57    3.17
   1  12   9    2.11    3.57
   1  12  10    6.09    4.10
   1  12  10   25.85   11.25
   1  12  11   44.64   13.79
   1  12  11   52.61   16.12
   1  12  12   10.82    7.39
   1  12  12  -12.42    8.26
   1  12  13   17.38    9.66
   1  12  13   21.00   10.84
   1  12  14    5.05    5.88
   1  12  14   11.16    9.63
   1  12  15    1.88    9.66
   1  12  15   -7.60    7.16
   1  13  -2   14.26   11.75
   1  13  -1    4.58    6.78
   1  13   0    0.03    9.96
   1  13   1    4.79    4.55
   1  13   2   31.35   13.53
   1  13   3   10.37    7.13
   1  13   4   22.76   11.04
   1  13   5   19.82    9.83
   1  13   6   -8.30    7.57
   1  13   7   16.19    7.65
   1  13   8   31.95    9.65
   1  13   8   25.00   11.57
   1  13   9    2.71    4.22
   1  13   9   -7.02    5.24
   1  13  10   -6.72    5.47
   1  13  10    0.71    2.82
   1  13  11    2.06    4.18
   1  13  11   13.78   10.06
   1  13  12    8.35    6.48
   1  13  12   16.06    6.91
   1  13  13    0.58    3.16
   1  13  13    6.65    6.50
   1  13  14   10.77    8.79
   1  13  14    0.02    7.77
   1  13  15   -5.90    6.62
   1  14   1   11.77   10.05
   1  14   2   32.32   15.55
   1  14   3    3.44    8.35
   1  14   4   -3.65    5.07
   1  14   5   -0.39    3.05
   1  14   6    0.61    6.54
   1  14   7  -15.89    9.68
   1  14   8   12.24    8.17
   1  14   9   27.59   12.34
   1  14  10   18.74   11.50
   1  14  11   11.17    8.10
   1  14  12   -0.85    2.65
   1  14  12    5.17    5.34
   1  14  13    3.17    4.22
   1  14  13   12.76    9.05
   1  14  14   -2.70    4.55
   1  14  15   17.81   10.50
   1  15   3   26.22   13.33
   1  15   4   20.24   11.66
   1  15   5   19.63   11.29
   1  15   6   12.68    9.13
   1  15   7    1.89    4.75
   1  15   8    0.60    5.33
   1  15   9    8.23    7.49
   1  15  10    5.70   10.07
   1  15  11    1.98    3.48
   2  -7  -5   19.07    4.91
   2  -7  -4  156.07   11.59
   2  -7  -3   73.02    5.62
   2  -6  -5  219.87   17.07
   2  -6  -4  168.22   12.68
   2  -6  -3  211.72   11.10
   2  -6   3    2.92    0.88
   2  -6   4   48.50    7.08
   2  -5  -5   22.77    5.58
   2  -5  -4  343.79   18.85
   2  -5  -3   73.97    7.10
   2  -5   2   13.99    2.31
   2  -5   2    6.96    1.68
   2  -5   3    1.44    1.40
   2  -5   4  155.19   13.56
   2  -5   5  253.33   19.73
   2  -5   6    2.97    2.13
   2  -5   7    3.17    3.27
   2  -4  -4   71.59    8.94
   2  -4  -3  145.45   10.64
   2  -4  -2    0.53    0.40
   2  -4   2   68.22    5.49
   2  -4   3  462.36   19.50
   2  -4   4  295.82   18.71
   2  -4   5   39.00    7.98
   2  -4   6    3.33    2.13
   2  -4   7   62.02   11.42
   2  -4   8   19.77    7.70
   2  -4   9   16.49    6.69
   2  -3  -4   55.83    8.20
   2  -3  -3   26.60    4.81
   2  -3  -2  260.22   12.04
   2  -3  -1 1223.65   42.32
   2  -3   0   55.96    9.51
   2  -3   2  329.75   12.68
   2  -3   3    5.12    2.27
   2  -3   4  438.26   22.77
   2  -3   5  138.61   14.64
   2  -3   6   31.83    8.14
   2  -3   7   53.37   10.41
   2  -3   8   86.17   14.96
   2  -3   9    7.69    6.07
   2  -3  10   10.68    6.48
   2  -3  11   18.88    9.60
   2  -2 -10  117.10   10.43
   2  -2  -9  102.72   10.58
   2  -2  -4  407.34   23.19
   2  -2  -3  411.48   20.18
   2  -2  -2   40.84    5.32
   2  -2  -1   22.98    3.25
   2  -2   0   30.96    5.85
   2  -2   1   11.07    3.81
   2  -2   2 1015.65   23.47
   2  -2   2 1058.88   39.77
   2  -2   3  101.08    9.39
   2  -2   4   -0.18    1.72
   2  -2   5   29.84    7.09
   2  -2   6   -0.01    2.12
   2  -2   7  255.42   24.10
   2  -2   7  214.26   15.21
   2  -2   8  187.29   22.45
   2  -2   8  114.28   10.44
   2  -2   9   23.25    8.60
   2  -2  10   26.59   10.09
   2  -2  11   -0.14    3.44
   2  -2  12   -1.17    4.14
   2  -2  13  -11.30    7.75
   2  -1  -9   83.07    7.82
   2  -1  -8   23.55    4.48
   2  -1  -7  675.10   25.23
   2  -1  -4   11.33    3.92
   2  -1  -3   14.18    3.97
   2  -1  -2   49.99    6.48
   2  -1  -1  215.53   11.09
   2  -1   0  121.64    9.78
   2  -1   1   -0.82    1.00
   2  -1   1    0.89    0.99
   2  -1   2   89.47    7.40
   2  -1   2   89.34    9.87
   2  -1   3   67.95    7.94
   2  -1   3   56.69    9.80
   2  -1   4   91.64   10.43
   2  -1   5  264.05   19.98
   2  -1   6    2.64    1.56
   2  -1   6   12.98    5.91
   2  -1   7   72.04    7.82
   2  -1   7   74.96   12.80
   2  -1   8   69.87    7.24
   2  -1   8  123.64   18.07
   2  -1   9   -7.86    5.85
   2  -1  10    1.91    5.30
   2  -1  11    4.86    6.17
   2  -1  12   -4.29    4.45
   2  -1  13    3.97    6.10
   2  -1  14   11.16    9.88
   2  -1  15    9.28   10.44
   2   0  -6  651.48   22.96
   2   0  -5  258.57   14.74
   2   0  -4 2182.74   42.79
   2   0  -3  115.46   12.09
   2   0  -3  121.32   10.15
   2   0  -2  164.77   12.75
   2   0  -2  182.93   12.25
   2   0  -1 1498.08   33.39
   2   0   1  500.88   17.06
   2   0   1  509.70   16.00
   2   0   2   98.21    8.67
   2   0   2  114.42    9.73
   2   0   2  113.52    9.20
   2   0   3  519.80   22.11
   2   0   3  506.86   20.49
   2   0   3  523.19   23.53
   2   0   4   -1.55    2.70
   2   0   4    3.17    2.99
   2   0   4   -0.24    0.85
   2   0   5  315.20   21.86
   2   0   5  339.50   16.85
   2   0   6  249.40   14.13
   2   0   6  253.49   21.99
   2   0   7  286.63   25.40
   2   0   8  314.50   28.69
   2   0   9   -1.82    4.48
   2   0  10    7.53    6.00
   2   0  11    5.95    3.90
   2   0  12  -12.86    7.85
   2   0  13    2.90    4.86
   2   0  14   12.19    8.81
   2   0  15   -5.24    6.18
   2   1  -3 1357.11   34.57
   2   1  -3 1345.40   43.75
   2   1  -2    5.11    2.30
   2   1  -2    4.98    2.29
   2   1  -1 6304.57   72.02
   2   1  -1 6322.79   75.63
   2   1   0  754.33   24.77
   2   1   0  702.91   22.13
   2   1   1 3124.99   50.54
   2   1   1 3189.00   46.25
   2   1   2 1076.75   29.46
   2   1   2 1033.60   28.82
   2   1   2 1037.12   21.42
   2   1   3  981.20   28.34
   2   1   3  908.55   30.82
   2   1   3  953.71   27.66
   2   1   4  839.78   26.66
   2   1   4  823.99   32.44
   2   1   4  841.33   31.18
   2   1   5    6.53    2.99
   2   1   5    2.60    2.09
   2   1   6  257.25   22.08
   2   1   7  231.63   22.73
   2   1   8  193.43   22.76
   2   1   9   78.73   15.64
   2   1  10   61.45   14.35
   2   1  11   48.03   13.26
   2   1  12    5.34    6.94
   2   1  13   37.23   12.83
   2   1  14    8.77    8.48
   2   1  15    4.25    5.67
   2   2  -4  432.49   21.12
   2   2  -3  303.41   14.64
   2   2  -2   48.05    7.86
   2   2  -2   38.68    3.97
   2   2  -1 1818.66   43.99
   2   2  -1 1740.51   38.66
   2   2   0  299.42   15.79
   2   2   0  320.09   12.47
   2   2   1    2.81    1.33
   2   2   1    4.84    2.59
   2   2   2 4356.26   63.44
   2   2   2 4290.81   60.98
   2   2   3   38.67    6.71
   2   2   3   45.33    7.01
   2   2   4   25.27    5.74
   2   2   4   39.26    7.43
   2   2   5   92.43   12.43
   2   2   6   28.72    8.37
   2   2   7  473.68   32.57
   2   2   8    3.88    4.37
   2   2   9   11.67    6.08
   2   2  10   28.93    9.14
   2   2  11   63.66   15.48
   2   2  12   -9.94    8.23
   2   2  13   28.35   12.61
   2   2  14   41.65   15.92
   2   2  15   14.54    9.64
   2   2  16   -0.94    3.88
   2   3  -7  115.34   15.86
   2   3  -6   27.68    7.19
   2   3  -5   63.10    9.77
   2   3  -4  153.39   18.62
   2   3  -4  144.07   13.05
   2   3  -3  447.04   29.18
   2   3  -2  151.89   14.94
   2   3  -2  168.73   15.88
   2   3  -1 1258.06   39.66
   2   3  -1 1180.84   37.20
   2   3   0   -0.77    1.14
   2   3   0   -2.21    2.65
   2   3   1  265.89   16.42
   2   3   1  264.98   12.36
   2   3   2   47.76    4.90
   2   3   2   54.87    7.65
   2   3   3    1.79    2.53
   2   3   4   34.06    7.57
   2   3   4   33.41    6.91
   2   3   5  589.81   31.91
   2   3   6  118.16   15.57
   2   3   7   18.65    6.86
   2   3   8   32.74    9.46
   2   3   9    1.09    2.56
   2   3  10  233.76   27.84
   2   3  11   37.77   11.69
   2   3  12    3.43    8.75
   2   3  13   20.49   11.63
   2   3  14   22.72   12.86
   2   3  15    6.91    8.92
   2   3  16   13.73   12.60
   2   4  -9   36.45   11.29
   2   4  -8   21.81    7.45
   2   4  -7  107.71   15.88
   2   4  -6    7.43    4.97
   2   4  -5   -5.41    5.99
   2   4  -5   -0.57    1.39
   2   4  -4    8.08    3.80
   2   4  -3  131.65   17.62
   2   4  -2  315.00   24.13
   2   4  -1  561.11   28.52
   2   4  -1  565.41   29.13
   2   4   0    8.02    3.70
   2   4   1  183.60   14.55
   2   4   1  204.99   14.01
   2   4   2    9.44    3.30
   2   4   2   13.71    3.28
   2   4   3  614.65   28.56
   2   4   3  592.85   23.24
   2   4   4  368.07   23.65
   2   4   5 1222.88   46.41
   2   4   6  181.95   19.47
   2   4   7   61.11   12.72
   2   4   8    5.44    3.94
   2   4   9    6.37    5.53
   2   4  10   -1.22    4.17
   2   4  11   10.98    5.23
   2   4  12   27.12   11.59
   2   4  13   29.58   11.99
   2   4  14    2.23    4.59
   2   4  15   24.46   13.00
   2   4  16   26.30   14.69
   2   5  -9   12.14    5.97
   2   5  -8   -5.75    3.43
   2   5  -7    5.47    3.31
   2   5  -6   96.35   19.57
   2   5  -6  112.55   16.20
   2   5  -5   63.98   15.06
   2   5  -4  184.01   23.64
   2   5  -3   85.26   15.04
   2   5  -2  504.05   33.40
   2   5  -1  100.98   13.98
   2   5   0  125.23   14.12
   2   5   1    1.73    1.40
   2   5   1    2.16    2.21
   2   5   2  184.09   15.52
   2   5   2  194.53   15.42
   2   5   3  392.29   23.60
   2   5   3  380.00   21.15
   2   5   4  333.13   22.95
   2   5   4  346.15   21.07
   2   5   5  163.37   17.49
   2   5   6  179.04   19.95
   2   5   7   -4.91    4.63
   2   5   8  128.25   18.89
   2   5   9    1.52    5.46
   2   5  10  233.46   28.44
   2   5  11    2.39    3.57
   2   5  12    9.22    8.06
   2   5  13   11.41    9.41
   2   5  14   -0.14    4.58
   2   5  15   19.02    9.49
   2   5  16    5.64    7.98
   2   6  -8    3.37    3.77
   2   6  -7   41.79   13.59
   2   6  -7   36.28   10.20
   2   6  -6   11.35    7.17
   2   6  -6   23.14    7.53
   2   6  -5   -6.52    8.29
   2   6  -4   -3.47    3.75
   2   6  -3  214.44   25.35
   2   6  -2  845.44   47.11
   2   6  -1  766.87   42.10
   2   6   0   70.74   12.50
   2   6   1  169.65   15.32
   2   6   1  165.57   17.53
   2   6   2   34.08    7.49
   2   6   2   27.92    6.88
   2   6   3    1.44    1.56
   2   6   3   -2.68    3.36
   2   6   4 1397.68   49.42
   2   6   4 1374.08   46.68
   2   6   5 1959.77   61.92
   2   6   5 2003.43   58.27
   2   6   6   26.13    8.00
   2   6   7  286.36   26.37
   2   6   8   31.46    9.93
   2   6   9    1.62    5.26
   2   6  10   25.24   10.33
   2   6  11    9.65    6.27
   2   6  12   40.22   13.40
   2   6  13  126.49   24.53
   2   6  14    3.09    5.48
   2   6  15    2.39    4.21
   2   6  16   28.31   14.85
   2   7  -7    9.57   10.77
   2   7  -7    7.12    3.98
   2   7  -6   16.46    8.35
   2   7  -5   -4.12    3.86
   2   7  -4  299.45   33.64
   2   7  -3    1.45    4.32
   2   7  -2  249.14   27.57
   2   7  -1   52.07   12.39
   2   7   0    9.20    5.32
   2   7   1   26.83    6.29
   2   7   1   17.06    6.97
   2   7   2 1123.97   41.61
   2   7   2 1028.14   46.81
   2   7   3    7.03    2.66
   2   7   3    6.82    3.27
   2   7   4  391.70   27.35
   2   7   4  402.90   27.95
   2   7   5  534.38   33.33
   2   7   5  572.81   33.48
   2   7   6   14.36    6.21
   2   7   6   22.51    6.60
   2   7   7  551.39   37.87
   2   7   8  474.02   37.24
   2   7   9   -1.78    3.71
   2   7  10   91.31   18.04
   2   7  11    9.17    6.29
   2   7  12   13.49    8.95
   2   7  13   11.63    8.69
   2   7  14   23.27   11.09
   2   7  15   -3.59    5.45
   2   7  16   -6.45    7.01
   2   8  -8   22.47   12.08
   2   8  -7   38.21   14.70
   2   8  -6   10.90    7.50
   2   8  -5    7.44    6.37
   2   8  -4   77.27   18.75
   2   8  -3   21.95   10.42
   2   8  -2  131.25   21.47
   2   8  -1   10.08    5.24
   2   8   0   19.78    7.31
   2   8   1  144.46   19.44
   2   8   2   97.69   13.00
   2   8   2   78.00   14.01
   2   8   3    2.71    3.88
   2   8   3    4.25    4.62
   2   8   4  122.85   15.67
   2   8   4  135.67   17.71
   2   8   5  467.38   31.65
   2   8   5  477.98   33.50
   2   8   6   49.44   10.76
   2   8   6   24.89    7.44
   2   8   7   91.45   15.20
   2   8   7   63.29   12.62
   2   8   8   42.89   11.86
   2   8   9   41.63   12.13
   2   8  10   52.31   12.63
   2   8  11   12.90    6.70
   2   8  12    6.72    6.63
   2   8  13   92.15   21.46
   2   8  14   -0.61    7.16
   2   8  15   12.01    6.58
   2   8  16   14.89   11.87
   2   9  -8   -4.63    6.41
   2   9  -7   19.93   12.01
   2   9  -6   45.30   16.73
   2   9  -5    4.73    5.22
   2   9  -4  123.61   24.73
   2   9  -3    9.37    7.24
   2   9  -2   20.23    9.06
   2   9  -1   24.29    8.37
   2   9   0   56.14   14.50
   2   9   1   30.83    9.80
   2   9   2    6.86    3.16
   2   9   2    3.55    5.20
   2   9   3  104.90   14.27
   2   9   3  106.52   17.43
   2   9   4   -0.40    3.89
   2   9   4   -4.21    6.05
   2   9   5  146.44   17.99
   2   9   5  109.48   17.37
   2   9   6  106.07   16.21
   2   9   6   98.70   16.71
   2   9   7   49.21   11.49
   2   9   7   55.00   12.78
   2   9   8   98.77   17.78
   2   9   8   81.12   15.77
   2   9   9   44.44   12.51
   2   9   9   44.77   11.77
   2   9  10    1.29    3.78
   2   9  11   -7.21    6.35
   2   9  12   13.05    6.90
   2   9  13   73.12   19.54
   2   9  14   16.79    8.56
   2   9  15    5.09    6.81
   2   9  16    6.72    7.08
   2  10  -7  -13.11    9.99
   2  10  -6   19.52   11.37
   2  10  -5   -3.19    5.10
   2  10  -4   39.88   14.67
   2  10  -3    5.14    5.84
   2  10  -2   33.68   12.42
   2  10  -1   53.53   15.24
   2  10   0   -4.68    6.51
   2  10   1   83.98   17.92
   2  10   2   18.55    7.46
   2  10   3    1.21    3.65
   2  10   3   -4.47    3.41
   2  10   4  213.89   21.54
   2  10   4  200.19   25.59
   2  10   5  277.63   25.46
   2  10   5  244.57   27.63
   2  10   6   -2.02    3.06
   2  10   6    4.37    5.38
   2  10   7   10.15    5.71
   2  10   7    5.06    5.21
   2  10   8   67.67   14.54
   2  10   8   70.40   15.51
   2  10   9    6.89    2.81
   2  10   9   18.77    7.59
   2  10  10   -4.03    7.83
   2  10  10   11.55    6.66
   2  10  11   57.34   15.78
   2  10  11   52.62   14.59
   2  10  12   19.93    7.57
   2  10  13   29.50   12.78
   2  10  14   -7.27    6.99
   2  10  15    4.25    5.75
   2  10  16    8.93    8.11
   2  11  -5   24.32   12.54
   2  11  -4    6.21    5.02
   2  11  -3   -5.56    6.10
   2  11  -2   30.80   12.13
   2  11  -1   41.12   14.89
   2  11   0   33.89   12.18
   2  11   1    2.75    3.52
   2  11   2   64.72   15.64
   2  11   3    1.19    2.04
   2  11   3   10.64    6.76
   2  11   4   60.35   11.74
   2  11   4   93.22   18.47
   2  11   5   30.16    8.42
   2  11   5   21.10    9.07
   2  11   6  119.82   17.96
   2  11   6  101.06   18.71
   2  11   7  334.17   31.70
   2  11   7  342.16   35.10
   2  11   8   80.11   16.49
   2  11   8   89.60   18.17
   2  11   9    8.79    6.97
   2  11   9    2.70    3.18
   2  11  10  -22.23    9.43
   2  11  10   -2.03    2.82
   2  11  11    7.14    6.17
   2  11  11   18.58    9.05
   2  11  12    7.26    7.54
   2  11  12    6.75    6.12
   2  11  13   16.57   10.07
   2  11  13   23.11   11.02
   2  11  14    2.60    5.32
   2  11  15    5.62    6.43
   2  11  16    0.26    3.54
   2  12  -4   51.58   18.27
   2  12  -3   -9.54    8.13
   2  12  -2   53.72   17.62
   2  12  -1    8.95    7.77
   2  12   0   -7.73    6.66
   2  12   1   19.05    9.90
   2  12   2   61.98   16.61
   2  12   3    0.34    2.63
   2  12   4   27.33    8.16
   2  12   4   41.23   13.31
   2  12   5   37.86    9.56
   2  12   5   29.39   10.60
   2  12   6   14.85    5.61
   2  12   6   11.24    5.65
   2  12   7   24.84    7.82
   2  12   7   30.73   11.02
   2  12   8   51.63   13.49
   2  12   8   45.44   13.86
   2  12   9    7.58    6.80
   2  12   9   10.92    6.31
   2  12  10   51.87   14.46
   2  12  10   49.91   14.47
   2  12  11    4.65    4.98
   2  12  11   10.91    8.19
   2  12  12   17.32    8.91
   2  12  12    0.21    4.99
   2  12  13   -0.71    3.39
   2  12  13    6.62    6.06
   2  12  14   -6.04    6.34
   2  12  14   -9.47    7.48
   2  12  15    3.00    5.28
   2  12  15    7.98    7.20
   2  13  -2    7.13    7.38
   2  13  -1    1.52    5.54
   2  13   0    3.85    6.12
   2  13   1    7.10    6.65
   2  13   2   23.44   10.60
   2  13   3   13.07    8.74
   2  13   4   45.35   14.65
   2  13   5   54.46   12.02
   2  13   5   45.02   14.41
   2  13   6   12.98    5.90
   2  13   6    1.82    5.97
   2  13   7   13.13    5.71
   2  13   7    9.18    5.83
   2  13   8   17.28    8.10
   2  13   8   15.63    7.94
   2  13   9    0.05    3.54
   2  13   9    7.96    6.34
   2  13  10   25.07   10.13
   2  13  10   14.06    9.00
   2  13  11  -11.62    7.36
   2  13  11    1.29    2.97
   2  13  12   -5.73    5.65
   2  13  12   11.50    7.02
   2  13  13   -1.46    3.85
   2  13  13   10.26    7.62
   2  13  14  -14.24    9.22
   2  13  14  -12.19    8.59
   2  13  15  -10.56    8.49
   2  13  15    3.01    4.75
   2  14   0   -1.30    4.04
   2  14   1   -8.40    7.50
   2  14   2   10.20    8.07
   2  14   3   -8.21    7.19
   2  14   4   16.53   11.36
   2  14   5    7.10    8.56
   2  14   6    2.12    3.89
   2  14   7   15.43    8.46
   2  14   8   34.92   13.56
   2  14   9    4.32    4.34
   2  14   9   10.14    6.73
   2  14  10   19.67    9.11
   2  14  10    9.20    7.39
   2  14  11    4.18    4.80
   2  14  11   14.45    8.88
   2  14  12    1.82    6.66
   2  14  12    7.88    6.79
   2  14  13    2.83    4.30
   2  14  13    5.14    4.93
   2  14  14   17.33   10.12
   2  14  14    3.60    5.12
   2  14  15   -6.77    6.88
   2  15   2    6.01    6.87
   2  15   3    6.38    8.64
   2  15   4    0.47    6.41
   2  15   5   12.04   10.63
   2  15   6    9.69    8.55
   2  15   7    5.04    5.82
   2  15   8   -2.77    4.71
   2  15   9   -9.83    7.77
   2  15  10   17.16   10.09
   2  15  11   -1.98    4.14
   2  15  12    9.21    7.60
   2  15  13   18.49   10.12
   2  15  13   16.19   10.02
   2  15  14    5.30    5.86
   2  16   6    8.37    7.83
   2  16   7   -1.69    4.39
   2  16   8    4.98    6.17
   2  16   9   13.07    9.39
   2  16  10  -15.42   10.14
   3  -7  -4   75.90    7.40
   3  -6  -5    6.10    3.32
   3  -6  -4   70.90    8.01
   3  -6  -3    4.39    1.38
   3  -5  -5  186.60   16.56
   3  -5  -4   20.73    4.96
   3  -5  -3   63.28    6.65
   3  -5   4  109.53    9.78
   3  -4  -4  146.37   13.50
   3  -4  -3  102.96    9.52
   3  -4  -2  392.10   14.34
   3  -4   3    1.94    0.77
   3  -4   4   39.43    6.29
   3  -4   5  205.44   16.68
   3  -4   6  285.57   22.24
   3  -4   7  315.17   26.02
   3  -3  -4   34.52    6.85
   3  -3  -3   34.86    6.17
   3  -3  -2  931.51   25.81
   3  -3   2  283.27   10.45
   3  -3   3    7.81    2.29
   3  -3   4   24.50    5.01
   3  -3   5  108.37   12.28
   3  -3   6   75.99   11.98
   3  -3   7   65.17   11.98
   3  -3   8  194.25   22.50
   3  -3   9   39.87   10.85
   3  -3  10   68.08   15.47
   3  -2 -10   -0.54    1.23
   3  -2  -9  192.63   17.44
   3  -2  -4  104.42   12.46
   3  -2  -3    1.51    1.68
   3  -2  -2   17.65    4.13
   3  -2   0  584.96   28.25
   3  -2   1 1033.92   20.61
   3  -2   1 1105.59   39.57
   3  -2   2  159.50    9.55
   3  -2   3    1.78    1.02
   3  -2   4   98.94   10.63
   3  -2   5    2.59    2.33
   3  -2   6   24.62    6.51
   3  -2   7  106.71   12.88
   3  -2   7  113.91   15.76
   3  -2   8  157.97   19.79
   3  -2   8  113.86   13.04
   3  -2   9   65.59   14.59
   3  -2  10   26.83    9.17
   3  -2  11    3.50    4.28
   3  -2  12    3.11    6.31
   3  -1  -9    7.45    3.61
   3  -1  -8   93.96   11.52
   3  -1  -7   15.67    4.87
   3  -1  -6   50.05    8.50
   3  -1  -3   27.54    6.15
   3  -1  -2  418.96   21.21
   3  -1  -1  962.34   28.57
   3  -1   0  107.76   10.69
   3  -1   1  269.88   12.72
   3  -1   1  272.02   16.86
   3  -1   2   34.16    4.98
   3  -1   2   34.55    6.83
   3  -1   3  775.88   27.00
   3  -1   3  783.16   33.87
   3  -1   4  447.73   23.56
   3  -1   5   -0.05    1.82
   3  -1   5   -3.18    2.68
   3  -1   6    5.13    2.71
   3  -1   6    6.81    3.16
   3  -1   7  140.01   17.75
   3  -1   7  139.50   13.87
   3  -1   8   27.93    8.86
   3  -1   8   27.07    5.92
   3  -1   9  131.58   19.99
   3  -1  10   15.12    6.99
   3  -1  11    6.33    5.91
   3  -1  12    2.89    4.47
   3  -1  13   17.98    7.85
   3  -1  14   -2.17    7.44
   3   0  -7  144.02   13.57
   3   0  -6   93.75   11.10
   3   0  -5  723.43   30.64
   3   0  -4  463.41   24.22
   3   0  -3  507.58   27.69
   3   0  -3  520.09   25.77
   3   0  -2  192.20   15.43
   3   0  -2  206.71   16.43
   3   0  -1   16.04    4.91
   3   0  -1   37.95    6.93
   3   0   0  747.37   30.83
   3   0   1   43.32    5.91
   3   0   1   44.19    5.58
   3   0   1   41.34    7.03
   3   0   2 1180.47   31.99
   3   0   2 1175.30   38.72
   3   0   2 1166.56   31.91
   3   0   3  175.76   13.54
   3   0   3  188.18   15.25
   3   0   3  178.08   14.00
   3   0   4  230.14   17.57
   3   0   4  214.04   16.49
   3   0   4  217.51   17.68
   3   0   5   22.61    6.59
   3   0   5   12.00    3.93
   3   0   6  167.22   17.69
   3   0   6  180.76   15.29
   3   0   7  413.49   22.82
   3   0   7  419.33   30.70
   3   0   8   15.21    6.54
   3   0   9   63.13   13.54
   3   0  10   69.14   15.86
   3   0  11   -3.22    3.98
   3   0  12    7.87    6.41
   3   0  13    9.98    5.94
   3   0  14    3.20    4.92
   3   0  15    4.02    6.13
   3   1  -5    3.92    2.41
   3   1  -4  253.75   18.01
   3   1  -3    9.35    2.86
   3   1  -2 1589.10   47.06
   3   1  -2 1578.93   43.95
   3   1  -1  837.29   31.69
   3   1  -1  766.93   30.77
   3   1   0  277.00   18.64
   3   1   1 2196.12   52.42
   3   1   1 2276.11   45.93
   3   1   2  792.29   31.35
   3   1   2  806.29   28.66
   3   1   2  812.72   20.01
   3   1   3  609.39   27.37
   3   1   3  578.90   25.85
   3   1   3  582.48   21.42
   3   1   4   44.38    7.14
   3   1   4   44.74    7.86
   3   1   4   48.32    7.80
   3   1   5  540.08   26.00
   3   1   5  552.61   30.23
   3   1   5  541.51   28.42
   3   1   6  185.21   15.27
   3   1   6  165.89   18.27
   3   1   7  542.97   35.03
   3   1   8    4.65    4.90
   3   1   9  347.32   32.26
   3   1  10  110.63   19.90
   3   1  11   -5.31    6.15
   3   1  12   -4.93    5.33
   3   1  13   25.30   11.18
   3   1  14   -0.02    3.56
   3   1  15   -4.64    5.97
   3   2  -1  170.63   14.77
   3   2  -1  164.90   15.05
   3   2   0  781.80   31.80
   3   2   1   29.02    6.18
   3   2   1   27.88    5.66
   3   2   2  877.04   33.58
   3   2   2  830.47   31.23
   3   2   3   18.34    3.24
   3   2   3   12.89    4.02
   3   2   4  203.19   17.23
   3   2   4  215.40   13.93
   3   2   5   58.54   10.51
   3   2   5   74.67    9.87
   3   2   6  143.16   16.68
   3   2   7  162.17   19.68
   3   2   8   25.33    8.50
   3   2   9   33.10   11.51
   3   2  10  147.96   22.00
   3   2  11   15.53    8.73
   3   2  12   19.51   10.13
   3   2  13   19.19    8.75
   3   2  14   20.57    8.96
   3   2  15    1.79    3.30
   3   2  16   15.43   10.31
   3   3  -1  846.56   36.33
   3   3  -1  823.10   30.43
   3   3   0  148.27   10.54
   3   3   0  145.07    6.92
   3   3   1    3.70    1.74
   3   3   1    4.43    1.54
   3   3   1    3.92    1.82
   3   3   2  315.26   19.91
   3   3   2  300.32   16.84
   3   3   3    8.20    3.81
   3   3   3    9.78    4.41
   3   3   4   49.29    8.76
   3   3   4   52.81    9.20
   3   3   5  340.22   24.63
   3   3   6   74.25   12.92
   3   3   7  123.34   17.51
   3   3   8   -0.74    4.25
   3   3   9  290.12   30.01
   3   3  10   99.02   19.08
   3   3  11   18.37    8.42
   3   3  12   -1.16    3.21
   3   3  13   16.09    9.36
   3   3  14   -1.06    5.70
   3   3  15   11.83    8.75
   3   3  16   -4.60    6.14
   3   4  -6    1.83    2.52
   3   4  -5   29.36    6.14
   3   4  -4   22.65    4.72
   3   4  -3    0.02    4.60
   3   4  -3    9.28    2.51
   3   4  -2  950.49   41.09
   3   4  -1  138.04   13.82
   3   4   0  381.27   20.44
   3   4   1   12.65    4.39
   3   4   1    9.50    2.77
   3   4   2  493.15   26.39
   3   4   2  479.65   17.58
   3   4   3   14.38    4.94
   3   4   3   16.95    3.27
   3   4   4   21.57    5.74
   3   4   4   17.49    5.97
   3   4   5   16.74    5.54
   3   4   6   37.26    8.95
   3   4   7  343.79   29.17
   3   4   8    1.43    3.39
   3   4   9   75.73   15.75
   3   4  10   15.30    7.42
   3   4  11   -5.31    4.52
   3   4  12   15.23    8.90
   3   4  13   58.10   17.26
   3   4  14    1.22    4.27
   3   4  15   22.24   12.12
   3   4  16   13.55    8.31
   3   5  -7    2.07    1.98
   3   5  -6   37.67    8.40
   3   5  -5   80.86   16.59
   3   5  -5   72.97   11.21
   3   5  -4   93.21   16.80
   3   5  -3   19.28    6.64
   3   5  -2 1660.56   59.34
   3   5  -1  250.64   21.50
   3   5   0  176.88   15.93
   3   5   1  216.64   18.25
   3   5   1  193.97   15.24
   3   5   2    4.15    2.37
   3   5   2    4.32    2.87
   3   5   3  511.03   29.13
   3   5   3  483.17   21.61
   3   5   4   25.17    6.79
   3   5   4   19.77    4.31
   3   5   5  185.26   19.24
   3   5   6   -4.69    5.47
   3   5   7  119.57   17.75
   3   5   8   -8.60    6.05
   3   5   9   17.26    6.90
   3   5  10  143.92   22.48
   3   5  11   -6.74    5.12
   3   5  12  105.38   21.69
   3   5  13   -6.27    7.15
   3   5  14  -21.58   10.92
   3   5  15   -3.10    5.17
   3   5  16    5.13    8.46
   3   6  -7   56.78   12.31
   3   6  -6   19.15   10.12
   3   6  -6   28.00    7.77
   3   6  -5   90.39   18.74
   3   6  -5  119.53   15.06
   3   6  -4   99.70   18.43
   3   6  -3   20.73    8.65
   3   6  -2  765.37   43.65
   3   6  -1    3.81    2.84
   3   6   0   90.74   12.92
   3   6   1 1266.31   46.02
   3   6   1 1148.60   43.17
   3   6   2  117.54   13.95
   3   6   2  123.85   13.06
   3   6   3   43.27    7.72
   3   6   3   47.27    8.00
   3   6   4  114.82   14.89
   3   6   4  123.85   12.77
   3   6   5    4.53    4.95
   3   6   5   -0.06    2.47
   3   6   6  584.45   36.88
   3   6   7   12.22    5.41
   3   6   8   23.80    8.57
   3   6   9    9.23    7.17
   3   6  10   13.40    7.34
   3   6  11   35.78   12.20
   3   6  12    7.70    6.18
   3   6  13  201.86   31.46
   3   6  14   -9.21    7.58
   3   6  15   23.00   12.02
   3   6  16   -3.27    9.05
   3   7  -6   -2.65    2.89
   3   7  -6  -10.71    5.35
   3   7  -5    2.95    2.69
   3   7  -4  451.71   40.92
   3   7  -3   14.92    7.71
   3   7  -2  107.41   18.02
   3   7  -1   25.62    8.45
   3   7   0    8.20    5.07
   3   7   1  100.38   13.47
   3   7   1   82.57   13.21
   3   7   2   91.45   12.89
   3   7   2   76.21   11.39
   3   7   3   59.90   10.55
   3   7   3   51.86    9.59
   3   7   4  474.02   31.49
   3   7   4  434.40   26.77
   3   7   5   82.19   13.88
   3   7   5   73.25   11.43
   3   7   6   17.53    6.94
   3   7   6    6.89    3.04
   3   7   7    4.73    5.37
   3   7   8   57.02   13.04
   3   7   9  233.73   27.80
   3   7  10    8.16    7.22
   3   7  11    2.17    3.46
   3   7  12   11.07    7.62
   3   7  13    2.92    7.13
   3   7  14    5.39    3.71
   3   7  15    6.39    4.02
   3   7  16   -5.51    6.80
   3   8  -7    6.00    6.22
   3   8  -6    4.56    4.27
   3   8  -5    5.71    8.03
   3   8  -4    4.21    6.42
   3   8  -3    3.97    3.14
   3   8  -2   26.21    8.71
   3   8  -1   76.82   15.73
   3   8   0    4.94    3.61
   3   8   1   97.10   15.10
   3   8   2   81.72   12.66
   3   8   2   82.64   13.18
   3   8   3   -2.15    2.74
   3   8   3   -0.39    1.63
   3   8   4  200.45   20.96
   3   8   4  185.21   19.23
   3   8   5   42.23   10.55
   3   8   5   40.97    9.07
   3   8   6    3.26    3.65
   3   8   6    3.49    3.16
   3   8   7  248.82   26.52
   3   8   7  257.26   24.00
   3   8   8  136.25   20.42
   3   8   9   53.29   13.65
   3   8  10   -1.23    6.50
   3   8  11  -14.33    8.35
   3   8  12   31.36   12.42
   3   8  13   33.68   14.55
   3   8  14   -0.36    3.55
   3   8  15   -8.37    7.58
   3   8  16  -10.30    8.52
   3   9  -7    6.34    5.86
   3   9  -6    5.30    6.34
   3   9  -5    4.34    3.45
   3   9  -4   14.30    7.67
   3   9  -3   55.96   15.66
   3   9  -2   11.03    7.06
   3   9  -1   10.11    6.45
   3   9   0   28.77    8.99
   3   9   1   83.93   16.13
   3   9   2  204.48   20.77
   3   9   2  181.86   21.88
   3   9   3   44.20   10.01
   3   9   3   25.28    8.50
   3   9   4   44.45   10.12
   3   9   4   57.89   12.60
   3   9   5   13.43    5.71
   3   9   5   20.34    6.85
   3   9   6   14.75    7.60
   3   9   6   20.62    7.87
   3   9   7  465.36   36.77
   3   9   7  433.87   33.58
   3   9   8   66.18   14.47
   3   9   8   65.37   12.97
   3   9   9   73.78   15.61
   3   9   9  107.32   18.15
   3   9  10   73.01   16.16
   3   9  11   26.34   10.67
   3   9  12   24.67   10.85
   3   9  13   18.14   10.51
   3   9  14   12.64   10.53
   3   9  15   17.16   10.12
   3   9  16    6.38    3.32
   3  10  -7   -4.56    6.32
   3  10  -6    0.36    6.74
   3  10  -5   10.90    8.25
   3  10  -4    4.93    6.70
   3  10  -3   32.99   12.18
   3  10  -2   87.70   19.42
   3  10  -1   -6.94    6.16
   3  10   0   65.72   15.63
   3  10   1  149.04   22.79
   3  10   2   18.88    8.88
   3  10   3   11.22    5.62
   3  10   3   18.08    8.00
   3  10   4   74.00   13.64
   3  10   4   99.50   17.60
   3  10   5   17.55    7.15
   3  10   5   15.02    6.32
   3  10   6   37.60    9.63
   3  10   6   30.86    9.74
   3  10   7   84.06   15.54
   3  10   7   85.36   15.63
   3  10   8   35.60   10.78
   3  10   8   25.17    9.13
   3  10   9   48.19   13.27
   3  10   9   35.44   10.88
   3  10  10  138.65   23.24
   3  10  10  146.28   22.72
   3  10  11   42.97   13.78
   3  10  11   37.31   12.47
   3  10  12   66.76   18.09
   3  10  13    4.66    4.51
   3  10  14    9.10    7.55
   3  10  15    4.35    5.95
   3  10  16   13.29    9.66
   3  11  -6    8.22    8.00
   3  11  -5   53.00   19.93
   3  11  -4   15.06    9.62
   3  11  -3    7.15    7.61
   3  11  -2   48.54   14.93
   3  11  -1   71.70   17.86
   3  11   0   29.45   11.73
   3  11   1   88.75   19.20
   3  11   2   10.15    8.51
   3  11   3   76.35   13.61
   3  11   3   81.89   17.87
   3  11   4   94.99   15.74
   3  11   4   77.70   16.19
   3  11   5   38.25    9.71
   3  11   5   28.27    9.73
   3  11   6   -0.32    3.17
   3  11   6   -5.31    3.75
   3  11   7   83.28   15.94
   3  11   7   92.68   17.44
   3  11   8   11.01    7.26
   3  11   8   -4.76    6.63
   3  11   9    2.53    3.82
   3  11   9    0.46    2.28
   3  11  10   57.69   15.92
   3  11  10   52.88   13.87
   3  11  11   -4.06    4.12
   3  11  11   -4.36    4.50
   3  11  12   -0.23    5.47
   3  11  12    3.13    3.84
   3  11  13   23.37   11.21
   3  11  14    0.03    7.51
   3  11  15   42.03   17.24
   3  11  16    2.06    8.68
   3  12  -4   33.91   15.11
   3  12  -3    4.12    4.76
   3  12  -2   64.05   17.99
   3  12  -1   16.08    8.67
   3  12   0   18.63   11.21
   3  12   1   25.22   11.52
   3  12   2   17.24    9.14
   3  12   3   52.32   14.23
   3  12   4   38.24   10.32
   3  12   4   52.93   13.97
   3  12   5    3.35    1.83
   3  12   5   -0.52    3.83
   3  12   6   57.97   13.80
   3  12   6   53.06   14.06
   3  12   7   -2.23    3.48
   3  12   7    5.32    5.97
   3  12   8    8.48    5.78
   3  12   8   -2.98    2.19
   3  12   9   33.19   11.88
   3  12   9   30.21   11.43
   3  12  10    4.50    4.84
   3  12  10    3.02    4.62
   3  12  11   -0.16    3.83
   3  12  11    1.64    3.20
   3  12  12    8.04    2.95
   3  12  12   -2.58    3.88
   3  12  13    3.42    4.22
   3  12  13    1.54    3.60
   3  12  14  -11.82    8.70
   3  12  14    0.34    2.44
   3  12  15    5.29    6.33
   3  12  15    5.97    6.01
   3  13  -3   -2.85    5.18
   3  13  -2    0.58    4.56
   3  13  -1   16.26   12.52
   3  13   0    4.50    5.40
   3  13   1   11.91    7.53
   3  13   2   16.08    9.45
   3  13   3   50.54   15.13
   3  13   4   38.14   10.69
   3  13   4   22.65    9.76
   3  13   5   10.20    5.60
   3  13   5    7.92    6.22
   3  13   6    4.93    5.02
   3  13   6    4.70    5.50
   3  13   7   17.79    8.47
   3  13   7   16.42    9.61
   3  13   8    4.28    4.37
   3  13   8   14.07    7.16
   3  13   9   15.69    8.60
   3  13   9   14.11    7.95
   3  13  10   16.57    8.73
   3  13  10   16.67    8.25
   3  13  11   12.05    7.08
   3  13  11   -1.00    2.70
   3  13  12   -0.02   12.53
   3  13  12   29.91   12.64
   3  13  13    3.05    5.50
   3  13  13    3.64    4.72
   3  13  14    2.84    4.86
   3  13  14  -15.63    9.38
   3  13  15  -16.90   10.53
   3  13  15    1.09    3.30
   3  13  16   -1.67    3.45
   3  14  -1    1.98    4.51
   3  14   0   -5.21    6.29
   3  14   1   15.26    9.58
   3  14   2    7.92    7.29
   3  14   3   46.99   15.36
   3  14   4    3.98    3.10
   3  14   5   11.52    7.82
   3  14   6    3.88    4.61
   3  14   6   -3.17    4.69
   3  14   7   -4.52    4.32
   3  14   7   -0.13    5.76
   3  14   8    1.18    3.45
   3  14   8    6.50    4.80
   3  14   9   19.63    8.98
   3  14   9   13.42    8.23
   3  14  10   12.95    8.14
   3  14  10    8.91    6.46
   3  14  11    2.21    3.80
   3  14  11    3.81    4.65
   3  14  12   21.66   11.03
   3  14  12    9.48    6.82
   3  14  13   -1.77    3.79
   3  14  13   -6.18    6.12
   3  14  14    8.28    8.44
   3  14  14   -0.45    2.97
   3  14  15   -2.00    5.87
   3  15   1   -0.06    2.96
   3  15   2    1.52    4.51
   3  15   3    5.56    6.29
   3  15   4    6.66    4.34
   3  15   5   -3.43    5.03
   3  15   6   -8.14    7.11
   3  15   7   10.59   10.61
   3  15   8   -4.86    5.53
   3  15   9   17.78    9.13
   3  15   9   26.71   10.99
   3  15  10   26.32   10.02
   3  15  10   18.46    8.24
   3  15  11  -10.13    7.13
   3  15  11    6.98    6.67
   3  15  12   -0.02    2.21
   3  15  12    3.75    4.86
   3  15  13    4.44    5.29
   3  15  13   -0.68    2.98
   3  15  14   -7.29    6.85
   3  15  14   12.34   10.11
   3  16   4    1.03    3.69
   3  16   5    4.81    7.98
   3  16   6   10.85    7.29
   3  16   7   20.08   11.94
   3  16   8   26.87   13.86
   3  16   9    8.07    7.40
   3  16  10    4.01    6.37
   3  16  11   -7.53    7.13
   3  16  12    6.19    6.41
   4  -5  -4   70.51    9.45
   4  -5  -3    0.52    0.72
   4  -4  -4   24.85    6.48
   4  -4  -3   62.67    7.88
   4  -4   4   82.36    8.16
   4  -3 -10   60.88   12.02
   4  -3  -3  140.40   13.44
   4  -3   3   27.45    4.21
   4  -3   4   -0.32    0.93
   4  -3   5   19.43    3.80
   4  -3   6    0.51    2.85
   4  -3   7   56.47   11.31
   4  -3   7   84.39   13.06
   4  -2 -10    2.82    2.12
   4  -2  -9   11.85    6.21
   4  -2  -8   63.11   11.55
   4  -2  -3  195.04   16.65
   4  -2  -2  231.93   16.28
   4  -2   2    0.42    0.69
   4  -2   3  525.02   21.58
   4  -2   4   51.12    7.66
   4  -2   5  292.67   20.64
   4  -2   6   14.16    5.24
   4  -2   6   13.52    5.30
   4  -2   7   51.73   10.59
   4  -2   7   28.36    7.38
   4  -2   8    0.86    2.76
   4  -2   8   -0.95    2.36
   4  -2   9   20.09    7.16
   4  -2  10   41.87   12.11
   4  -1  -9   -1.29    1.85
   4  -1  -8  112.24   14.71
   4  -1  -7    4.35    3.29
   4  -1  -6   72.68   11.61
   4  -1  -5  137.27   16.06
   4  -1  -2  583.11   28.14
   4  -1   1 1118.24   38.00
   4  -1   2   95.43    9.20
   4  -1   2   93.74   11.36
   4  -1   3   64.03    8.46
   4  -1   4    7.35    4.03
   4  -1   4    5.80    3.31
   4  -1   5   57.53   10.32
   4  -1   5   49.26    8.73
   4  -1   6  150.53   16.80
   4  -1   6  125.27   15.50
   4  -1   7  224.66   22.42
   4  -1   7  208.44   19.96
   4  -1   8  225.32   23.95
   4  -1   8  171.77   17.78
   4  -1   9    8.19    5.49
   4  -1  10   29.96    9.78
   4  -1  11    4.32    7.08
   4  -1  12    0.26    6.85
   4   0  -8  145.42   16.04
   4   0  -7   -0.52    2.50
   4   0  -6    3.61    3.41
   4   0  -5    4.86    2.36
   4   0  -4  174.18   17.66
   4   0  -3   12.66    4.60
   4   0  -2   83.12   11.22
   4   0  -2   77.28   11.62
   4   0  -1   54.65    9.61
   4   0   0  673.38   34.14
   4   0   1 1957.50   44.85
   4   0   1 1882.18   57.38
   4   0   1 1926.83   41.83
   4   0   2   26.25    6.57
   4   0   2   26.45    5.35
   4   0   2   25.96    4.97
   4   0   3 1119.63   36.80
   4   0   3 1130.83   44.25
   4   0   3 1090.73   36.70
   4   0   4  367.32   22.62
   4   0   4  363.20   25.28
   4   0   4  374.07   23.59
   4   0   5  129.09   14.76
   4   0   5  137.01   15.58
   4   0   6    0.67    2.71
   4   0   6    0.23    2.67
   4   0   7   45.42   10.10
   4   0   7   24.26    6.21
   4   0   8    9.69    4.78
   4   0   8    8.81    4.17
   4   0   9  221.02   25.82
   4   0  10   58.86   13.89
   4   0  11    9.25    5.96
   4   0  12   -2.68    7.33
   4   0  13   12.14    6.39
   4   0  14    5.45    5.70
   4   1  -6   -1.79    1.62
   4   1  -5   98.29   12.85
   4   1  -4   -1.38    1.70
   4   1  -3  125.51   14.78
   4   1  -2   22.04    6.59
   4   1  -1   33.80    7.39
   4   1   0   19.32    6.09
   4   1   1 1777.89   54.61
   4   1   1 1732.71   45.16
   4   1   2   37.22    7.81
   4   1   2   43.94    5.14
   4   1   2   36.42    6.74
   4   1   3  692.64   30.52
   4   1   3  716.26   34.38
   4   1   3  703.65   24.44
   4   1   4 1016.13   41.35
   4   1   4  983.43   38.60
   4   1   4  961.18   32.97
   4   1   5   81.84   11.78
   4   1   5   65.55   10.76
   4   1   5   57.06    9.27
   4   1   6   82.40   12.05
   4   1   6   87.00   13.55
   4   1   7   96.59   13.20
   4   1   7  102.72   15.65
   4   1   8   -1.11    2.45
   4   1   9  140.14   21.16
   4   1  10    6.00    6.77
   4   1  11   -7.53    7.03
   4   1  12   10.06    5.41
   4   1  13   39.17   14.43
   4   1  14    2.58    4.59
   4   1  15  -11.58    8.56
   4   2  -3   11.07    4.83
   4   2  -2   68.43   11.25
   4   2  -1  181.27   17.85
   4   2   0  248.83   20.64
   4   2   1  116.26   13.93
   4   2   1  104.70   11.73
   4   2   2  269.56   21.12
   4   2   2  227.37   17.82
   4   2   3  288.93   21.84
   4   2   3  262.07   19.94
   4   2   3  250.87   11.10
   4   2   4   78.54   11.51
   4   2   4   80.64   11.67
   4   2   4   79.15    8.17
   4   2   5   80.55   11.84
   4   2   5   59.18   10.39
   4   2   5   75.74    9.62
   4   2   6  174.34   19.63
   4   2   7  554.42   36.62
   4   2   8  248.27   26.07
   4   2   9  115.84   19.07
   4   2  10   15.23    7.80
   4   2  11    8.37    6.50
   4   2  12   55.10   16.60
   4   2  13    3.32    3.97
   4   2  14    3.26    6.00
   4   2  15    5.89    6.47
   4   2  16    7.25    7.45
   4   3   1  243.52   19.17
   4   3   2   -0.90    1.88
   4   3   3  699.79   33.93
   4   3   4   -0.17    0.78
   4   3   4    0.63    1.94
   4   3   5  107.28   14.37
   4   3   5  118.22   10.97
   4   3   6  402.72   29.69
   4   3   6  414.77   23.96
   4   3   7  110.21   17.24
   4   3   8   63.24   13.19
   4   3   9  171.70   23.57
   4   3  10   54.64   14.41
   4   3  11    8.71    6.52
   4   3  12   63.39   16.79
   4   3  13   17.84    9.95
   4   3  14    2.05    5.99
   4   3  15   11.18    8.41
   4   3  16   -2.84    5.12
   4   4   0  137.59   11.83
   4   4   0  131.28    7.07
   4   4   1  623.06   32.32
   4   4   1  629.47   20.43
   4   4   1  634.75   21.34
   4   4   2   27.86    3.44
   4   4   2   21.93    6.04
   4   4   2   30.75    5.49
   4   4   3   77.88   11.44
   4   4   3   56.08    4.64
   4   4   3   73.62   10.10
   4   4   4    6.38    4.51
   4   4   5    2.14    4.59
   4   4   6  511.94   34.55
   4   4   7  191.69   22.64
   4   4   8   20.79    8.22
   4   4   9   35.13   10.81
   4   4  10   62.00   15.22
   4   4  11   19.31   10.16
   4   4  12   87.38   19.70
   4   4  13   21.96   10.40
   4   4  14    7.08    6.88
   4   4  15    5.15    6.40
   4   4  16    8.12    8.98
   4   5  -4   28.31    4.80
   4   5  -3  203.20   22.80
   4   5  -3  187.78   10.92
   4   5  -2  558.91   34.56
   4   5  -1   -1.93    3.53
   4   5   0   17.05    4.76
   4   5   1   39.25    6.40
   4   5   1   41.98    8.53
   4   5   2  100.61   13.55
   4   5   2   84.65    8.17
   4   5   3  143.18   16.23
   4   5   3  136.27    9.89
   4   5   3  146.42   14.20
   4   5   4  496.88   31.91
   4   5   4  458.49   18.67
   4   5   5   14.39    5.61
   4   5   6  116.69   16.87
   4   5   7   -5.71    6.07
   4   5   8   27.11    8.92
   4   5   9   93.18   17.81
   4   5  10   23.91   10.08
   4   5  11   15.99    9.74
   4   5  12   84.74   19.78
   4   5  13   -3.30    4.78
   4   5  14   13.41    9.01
   4   5  15    7.99    4.95
   4   5  16   14.88   10.06
   4   6  -5  154.54   14.73
   4   6  -4   -8.66    6.80
   4   6  -4    0.03    1.59
   4   6  -3   39.72   10.99
   4   6  -2  229.76   23.68
   4   6  -1   56.40   10.77
   4   6   0   19.60    6.43
   4   6   1  360.75   27.02
   4   6   1  351.20   22.74
   4   6   2   11.90    4.65
   4   6   2    4.85    2.64
   4   6   3  211.59   20.76
   4   6   3  190.72   14.70
   4   6   4   -3.18    4.86
   4   6   4    4.36    1.89
   4   6   5   73.38   13.09
   4   6   5   60.93    8.48
   4   6   6   -2.85    3.25
   4   6   7  157.80   20.55
   4   6   8    0.04    6.34
   4   6   9   -1.05    3.80
   4   6  10    9.34    3.68
   4   6  11   25.80   10.57
   4   6  12   42.51   14.36
   4   6  13   17.67   11.56
   4   6  14    7.85    8.18
   4   6  15    2.09    6.35
   4   6  16  -16.30   10.62
   4   7  -5   18.39    9.30
   4   7  -5   22.54    6.34
   4   7  -4  200.97   27.40
   4   7  -3  103.11   18.31
   4   7  -2  125.77   19.21
   4   7  -1    3.10    4.34
   4   7   0   84.28   13.42
   4   7   1  298.36   25.26
   4   7   1  285.47   23.27
   4   7   2    7.59    4.99
   4   7   2    3.68    3.16
   4   7   3  198.65   20.79
   4   7   3  193.48   16.65
   4   7   4  280.35   25.24
   4   7   4  234.14   18.25
   4   7   5   51.22   11.37
   4   7   5   57.56    9.10
   4   7   6  113.09   16.83
   4   7   6   91.41   11.79
   4   7   7   51.52   11.76
   4   7   8   13.25    6.99
   4   7   9   21.49    7.92
   4   7  10    4.88    3.46
   4   7  11   12.37    8.80
   4   7  12   26.44   10.73
   4   7  13    3.76    8.09
   4   7  14   21.90   12.46
   4   7  15   27.49   13.39
   4   7  16    0.03   10.52
   4   8  -6   -2.57    4.39
   4   8  -5   40.02   13.58
   4   8  -4   -3.81    4.50
   4   8  -3  105.96   19.47
   4   8  -2    3.69    5.18
   4   8  -1   14.54    6.68
   4   8   0   72.61   14.20
   4   8   1  498.21   33.94
   4   8   2   66.92   12.45
   4   8   2   86.28   13.37
   4   8   3  326.67   27.53
   4   8   3  288.06   23.54
   4   8   4   62.05   12.39
   4   8   4   46.83    9.21
   4   8   5   67.88   13.17
   4   8   5   67.79   10.60
   4   8   6  161.72   21.58
   4   8   6  158.23   16.96
   4   8   7   31.67    9.89
   4   8   7   37.05    8.27
   4   8   8   22.82    8.66
   4   8   8   32.62    8.56
   4   8   9  124.55   20.66
   4   8  10    6.49    5.21
   4   8  11   11.28    7.35
   4   8  12   38.13   13.77
   4   8  13   -5.53    9.22
   4   8  14   11.11    8.58
   4   8  15    2.41    4.99
   4   8  16    0.34    4.08
   4   9  -6   29.73   12.96
   4   9  -5   10.10    4.90
   4   9  -4   -2.85    6.92
   4   9  -3   61.64   15.87
   4   9  -2    7.96    6.05
   4   9  -1   26.73    8.86
   4   9   0   19.54    7.50
   4   9   1  220.27   24.77
   4   9   2   12.39    5.52
   4   9   2    6.83    4.16
   4   9   3  115.03   17.16
   4   9   3  115.65   16.21
   4   9   4  187.36   21.60
   4   9   4  145.72   18.60
   4   9   5   22.48    7.53
   4   9   5   38.75    8.63
   4   9   6   28.74    8.95
   4   9   6   22.19    7.43
   4   9   7    6.14    5.24
   4   9   7   16.28    6.44
   4   9   8   18.29    7.69
   4   9   8   13.06    6.22
   4   9   9  137.82   22.44
   4   9   9  130.84   19.12
   4   9  10   12.94    6.72
   4   9  11   -4.63    5.66
   4   9  12   34.81   12.00
   4   9  13    4.83    5.88
   4   9  14   35.78   13.85
   4   9  15    1.52    4.32
   4   9  16    7.87    6.08
   4  10  -6    6.54    6.90
   4  10  -5   96.23   23.11
   4  10  -4    0.81    3.41
   4  10  -3   86.29   20.71
   4  10  -2    5.18    6.35
   4  10  -1    3.43    5.32
   4  10   0    0.71    5.82
   4  10   1    0.65    3.32
   4  10   2   86.61   15.93
   4  10   3   12.18    5.73
   4  10   3   17.19    6.69
   4  10   4  124.39   18.49
   4  10   4  126.58   18.31
   4  10   5    1.93    2.80
   4  10   5    0.37    3.49
   4  10   6   43.60   11.14
   4  10   6   45.12   10.88
   4  10   7   77.34   15.76
   4  10   7   66.89   12.85
   4  10   8    4.77    6.45
   4  10   8   -0.15    4.68
   4  10   9   23.57    9.30
   4  10   9   10.01    4.81
   4  10  10    5.02    6.65
   4  10  10   -2.07    2.37
   4  10  11    0.51    4.43
   4  10  11    4.01    4.15
   4  10  12   29.37   11.46
   4  10  13   -7.90    6.89
   4  10  14    5.78    5.14
   4  10  15    1.99    4.89
   4  10  16   -0.03    3.78
   4  11  -6   -2.40    4.92
   4  11  -5   37.81   16.07
   4  11  -4  -20.01   10.90
   4  11  -3   11.00    7.89
   4  11  -2    5.83    5.40
   4  11  -1    0.75    5.37
   4  11   0   33.66   11.54
   4  11   1   18.84    8.88
   4  11   2   52.05   13.36
   4  11   3   24.50    7.93
   4  11   3   49.02   13.20
   4  11   4   15.05    6.37
   4  11   4   10.91    5.45
   4  11   5    0.61    3.38
   4  11   5    4.65    5.66
   4  11   6   43.10   11.13
   4  11   6   42.77   10.98
   4  11   7  212.89   26.54
   4  11   7  256.05   27.53
   4  11   8    7.40    5.37
   4  11   8    9.23    5.48
   4  11   9   -0.15    2.53
   4  11   9    1.95    1.91
   4  11  10   83.48   16.94
   4  11  10   62.66   16.28
   4  11  11    8.88    9.40
   4  11  11   -5.88    4.93
   4  11  12   35.28   12.92
   4  11  12   20.54    9.84
   4  11  13   10.39    5.57
   4  11  14    2.73    4.94
   4  11  15    7.29    6.82
   4  12  -5  -10.04    8.84
   4  12  -4   -0.33    3.13
   4  12  -3    4.77    5.90
   4  12  -2   11.76    8.22
   4  12  -1    1.31    5.42
   4  12   0    6.86    3.45
   4  12   1   15.20    9.80
   4  12   2   -5.51    7.02
   4  12   3  157.58   24.55
   4  12   4   -0.79    3.37
   4  12   4   10.27    4.85
   4  12   5    2.53    3.59
   4  12   5    0.02    3.56
   4  12   6   56.67   13.08
   4  12   6   66.33   14.34
   4  12   7    9.93    5.76
   4  12   7   22.98    8.26
   4  12   8    2.09    3.55
   4  12   8    1.26    3.20
   4  12   9    8.01    5.60
   4  12   9    4.16    2.21
   4  12  10   72.27   17.87
   4  12  10   71.86   16.33
   4  12  11    5.51    6.63
   4  12  11   -1.39    5.25
   4  12  12   14.99   10.05
   4  12  12   34.65   11.08
   4  12  13    4.87    5.18
   4  12  13    8.03    5.56
   4  12  14   15.36   12.23
   4  12  14    4.82    5.13
   4  12  15    0.71    3.57
   4  12  15   11.48    7.78
   4  13  -3    5.99    6.79
   4  13  -2    0.03    6.65
   4  13  -1  -15.19    9.48
   4  13   0   37.72   14.64
   4  13   1   24.55   11.10
   4  13   2    6.16    6.56
   4  13   3   66.52   16.97
   4  13   4   24.32    7.64
   4  13   4   19.68    7.85
   4  13   5   -0.38    2.10
   4  13   5    0.67    2.50
   4  13   6   46.34   12.14
   4  13   6   22.83    9.84
   4  13   7   -1.26    2.94
   4  13   7    0.61    2.70
   4  13   8   -1.03    2.99
   4  13   8  -14.80    7.75
   4  13   9   36.15   12.81
   4  13   9   41.20   12.72
   4  13  10    2.39    4.32
   4  13  10   16.00    8.16
   4  13  11   20.27   10.31
   4  13  11    8.25    7.86
   4  13  12    8.07    8.99
   4  13  12   11.62    7.35
   4  13  13  -11.50    8.17
   4  13  13  -16.91    9.10
   4  13  14    0.03    5.95
   4  13  14    1.67    3.36
   4  13  15    4.22    5.05
   4  13  15   -3.65    4.77
   4  13  16   -1.50    3.72
   4  14  -2   -7.34    7.53
   4  14  -1   -8.56    7.82
   4  14   0    7.84    7.80
   4  14   1   21.00   10.46
   4  14   2   -1.08    3.25
   4  14   3   60.80   17.18
   4  14   4   18.35    9.42
   4  14   5    7.68    5.78
   4  14   5    2.96    4.40
   4  14   6   38.92   11.91
   4  14   6   20.46    9.97
   4  14   7    4.42    5.21
   4  14   7    8.29    7.70
   4  14   8    6.29    5.20
   4  14   8    3.75    4.67
   4  14   9   30.32   11.74
   4  14   9   25.72   11.06
   4  14  10    0.14    2.44
   4  14  10    0.20    2.33
   4  14  11    7.98    6.64
   4  14  11    5.50    5.29
   4  14  12   11.18    9.47
   4  14  12   13.39    6.10
   4  14  13   16.07   10.44
   4  14  13    1.77    4.81
   4  14  14   10.82    8.40
   4  14  14    6.46    6.17
   4  14  15    0.15    2.35
   4  14  16   -7.73    7.06
   4  15   0   -1.13    3.64
   4  15   1    2.98    5.02
   4  15   2   14.10   11.20
   4  15   3   13.01    8.83
   4  15   4    0.28    3.50
   4  15   5   -8.48    7.02
   4  15   6    6.15    5.05
   4  15   6   -1.13    3.30
   4  15   7   10.31    6.48
   4  15   7   -3.93    4.99
   4  15   8   -6.14    5.23
   4  15   8    1.57    3.57
   4  15   9   34.07   12.46
   4  15   9   25.12   11.02
   4  15  10    6.40    6.46
   4  15  10    6.53    5.49
   4  15  11   16.82   10.56
   4  15  11   19.10   10.73
   4  15  12    2.42    4.35
   4  15  12   23.14   10.91
   4  15  13   -2.84    4.48
   4  15  13   15.69    9.20
   4  15  14   13.91   12.89
   4  15  14    5.19    5.74
   4  15  15   11.69    8.51
   4  16   3  -10.63    8.70
   4  16   4   -3.76    5.40
   4  16   5    3.42    5.11
   4  16   6    4.00    5.19
   4  16   7   -0.02    2.50
   4  16   8   -5.06    5.87
   4  16   9   17.23   11.35
   4  16  10  -11.13    6.18
   4  16  10   -4.00    5.28
   4  16  11    3.06    4.34
   4  16  11    0.42    2.75
   4  16  12   -3.90    5.19
   4  16  12    5.52    6.02
   4  16  13    0.21    2.21
   4  16  13    1.22    3.72
   4  17   6    9.08    7.88
   4  17   7   -7.06    7.11
   4  17   8   13.60    9.35
   4  17   9    1.00    3.57
   4  17  10   -2.46    4.41
   4  17  11    1.91    4.41
   5  -4 -11   -2.55    4.62
   5  -4   7    1.51    4.81
   5  -3 -10   32.28   10.35
   5  -3  -9   -2.23    4.09
   5  -3  -3   22.81    6.26
   5  -3   3   23.69    4.36
   5  -3   4   45.14    6.53
   5  -3   6  391.26   33.32
   5  -3   7    3.74    3.90
   5  -2 -10    7.45    4.87
   5  -2  -9  102.51   16.18
   5  -2  -8   13.60    7.47
   5  -2  -7   11.21    5.97
   5  -2   3  186.38   13.68
   5  -2   4  156.72   13.72
   5  -2   5    4.28    2.97
   5  -2   5    2.70    2.39
   5  -2   6   77.29   11.83
   5  -2   6   62.85   12.46
   5  -2   7    1.93    2.54
   5  -2   7   -1.59    4.51
   5  -2   8    1.56    1.60
   5  -1  -9   -2.43    2.73
   5  -1  -8  134.23   17.89
   5  -1  -7   19.28    7.03
   5  -1  -6  256.84   24.66
   5  -1  -5  210.42   22.39
   5  -1  -4    0.58    2.81
   5  -1  -3   57.19   11.06
   5  -1   1  302.08   21.30
   5  -1   2   77.00    9.38
   5  -1   2   79.89   13.55
   5  -1   3   39.11    9.87
   5  -1   3   29.73    6.36
   5  -1   4   33.98    9.03
   5  -1   4   44.13    8.10
   5  -1   5    0.29    2.42
   5  -1   5   -1.60    3.48
   5  -1   6    9.71    4.33
   5  -1   6    1.78    3.47
   5  -1   7   16.60    6.19
   5  -1   7   12.06    4.02
   5  -1   8   -1.91    2.48
   5  -1   8    2.54    3.98
   5  -1   9   27.28    9.08
   5  -1  10   -7.73    5.51
   5   0  -9    5.20    3.56
   5   0  -8    6.97    4.59
   5   0  -7    7.12    5.11
   5   0  -6   33.42    9.19
   5   0  -5   60.48   11.42
   5   0  -4   -4.03    3.41
   5   0  -3  544.15   34.88
   5   0  -2  433.87   30.98
   5   0  -1   19.65    7.43
   5   0   0  108.98   15.09
   5   0   1    2.28    2.41
   5   0   2  200.81   16.29
   5   0   2  228.84   22.53
   5   0   2  201.33   15.60
   5   0   3  109.80   12.37
   5   0   3  106.81   15.07
   5   0   3  105.65   11.85
   5   0   4   14.59    5.09
   5   0   4   21.34    5.66
   5   0   5  127.30   15.28
   5   0   5  114.23   16.08
   5   0   6   -0.43    2.86
   5   0   6    3.59    3.81
   5   0   7    3.91    2.81
   5   0   7    2.13    2.97
   5   0   8   28.92    8.89
   5   0   8   40.19    9.68
   5   0   9   -3.96    5.29
   5   0   9   -2.45    2.63
   5   0  10   -3.17    4.72
   5   0  11   -3.89    5.75
   5   0  12   19.02    9.89
   5   1  -7   -2.67    2.46
   5   1  -6   23.19    6.99
   5   1  -5  122.97   16.26
   5   1  -4   58.86   11.13
   5   1  -3  527.79   33.46
   5   1  -2   44.88    9.63
   5   1  -1  123.83   16.09
   5   1   0   38.10    9.24
   5   1   1 1229.83   51.82
   5   1   1 1299.24   43.31
   5   1   2    2.48    2.76
   5   1   2    1.02    1.54
   5   1   3   84.02   13.44
   5   1   3   75.27    8.44
   5   1   3   71.30   10.33
   5   1   4   81.18   12.21
   5   1   4   78.68   13.04
   5   1   4   81.06    9.98
   5   1   5  175.68   19.52
   5   1   5  165.80   18.24
   5   1   5  171.25   16.02
   5   1   6  252.03   23.40
   5   1   6  254.13   23.24
   5   1   7    3.90    4.15
   5   1   7   -0.46    3.55
   5   1   8    9.27    5.14
   5   1   8    5.03    3.73
   5   1   9   -3.51    5.01
   5   1  10    0.37    2.78
   5   1  11   -0.09    2.44
   5   1  12   12.49    7.10
   5   1  13   -2.21    4.07
   5   1  14   -3.44    4.85
   5   2  -5   20.14    7.27
   5   2  -4    1.52    2.50
   5   2  -3  583.03   35.10
   5   2  -2  240.53   22.34
   5   2  -1    3.53    2.95
   5   2   0  524.98   33.18
   5   2   1    2.57    3.68
   5   2   1    0.27    3.68
   5   2   2  730.36   39.31
   5   2   2  722.78   34.55
   5   2   3  109.59   15.27
   5   2   3  118.56   14.35
   5   2   3   92.12    6.94
   5   2   4 1227.79   51.77
   5   2   4 1230.26   47.75
   5   2   4 1192.99   31.56
   5   2   5    4.19    3.79
   5   2   5    7.04    4.44
   5   2   5    2.55    2.33
   5   2   6  250.93   23.51
   5   2   6  255.89   23.94
   5   2   6  238.29   19.25
   5   2   7    9.65    3.44
   5   2   8  236.26   25.77
   5   2   9   96.36   17.58
   5   2  10   27.68   10.29
   5   2  11   32.89   12.43
   5   2  12   24.79   12.01
   5   2  13    2.67    4.49
   5   2  14   21.41   11.01
   5   2  15    4.49    4.91
   5   3   0  107.22   14.95
   5   3   1   92.28   14.19
   5   3   1   89.97   12.76
   5   3   2   13.18    5.41
   5   3   2   12.67    4.42
   5   3   3 1363.53   54.82
   5   3   3 1383.56   50.45
   5   3   4  109.73   14.90
   5   3   4   85.89    6.51
   5   3   5  189.50   20.52
   5   3   5  166.75   12.12
   5   3   6  865.67   45.09
   5   3   6  881.53   33.71
   5   3   7  290.59   27.26
   5   3   8    0.41    4.25
   5   3   9   36.40   11.45
   5   3  10    0.92    3.36
   5   3  11   11.25    7.03
   5   3  12   90.00   19.48
   5   3  13   -9.33    7.19
   5   3  14    3.90    5.39
   5   3  15    0.88    3.71
   5   3  16  -11.25    8.88
   5   4   1   11.99    4.53
   5   4   2   15.06    4.85
   5   4   3  218.10   21.03
   5   4   4  350.90   27.62
   5   4   5   55.90   11.06
   5   4   5   48.93    5.88
   5   4   6  457.99   33.66
   5   4   6  439.61   22.06
   5   4   7   72.74   10.34
   5   4   7   84.19   16.08
   5   4   8  108.36   17.86
   5   4   9   68.82   15.24
   5   4  10   43.20   13.09
   5   4  11    5.40    5.64
   5   4  12   51.31   15.79
   5   4  13    7.49    6.73
   5   4  14   22.83   11.17
   5   4  15    3.65    5.43
   5   4  16  -24.43   12.73
   5   5   1  145.22   17.38
   5   5   1  152.11   11.66
   5   5   1  145.91   10.55
   5   5   2   14.09    2.80
   5   5   2   11.34    5.17
   5   5   2   12.48    3.71
   5   5   3   65.01    4.89
   5   5   3   85.27   13.56
   5   5   3   74.83   10.53
   5   5   4   82.33   13.72
   5   5   4   72.92    5.54
   5   5   5    5.30    4.37
   5   5   6  574.29   38.34
   5   5   7   44.93    7.92
   5   5   7   59.97   13.98
   5   5   8  117.39   18.65
   5   5   9    2.01    3.72
   5   5  10   -5.61    4.54
   5   5  11    2.28    4.09
   5   5  12   97.98   21.01
   5   5  13    4.82    4.32
   5   5  14   22.30   12.96
   5   5  15    1.82    4.20
   5   5  16  -10.32    8.67
   5   6  -2   19.27    5.62
   5   6  -1  282.85   24.05
   5   6   0  113.46   13.89
   5   6   1   32.40    6.77
   5   6   1   23.73    4.69
   5   6   1   23.95    7.43
   5   6   2    0.87    1.10
   5   6   2    0.42    1.17
   5   6   2    2.22    2.99
   5   6   3    0.51    1.53
   5   6   3   -0.05    2.46
   5   6   3    0.45    1.37
   5   6   4  134.67   17.97
   5   6   4  121.05    9.46
   5   6   5   66.26   12.88
   5   6   5   75.20    7.78
   5   6   6  132.52   19.23
   5   6   7    9.10    4.85
   5   6   8   85.01   16.51
   5   6   9   88.48   17.02
   5   6  10   -3.66    3.97
   5   6  11  227.31   30.93
   5   6  12   -3.41    3.56
   5   6  13   -2.16    4.61
   5   6  14  -17.95   10.19
   5   6  15    8.56    4.40
   5   6  16    1.06    3.58
   5   7  -3  384.56   34.57
   5   7  -3  260.41   14.28
   5   7  -2  151.62   20.55
   5   7  -1   50.89   10.75
   5   7   0  314.28   25.64
   5   7   1  113.22   14.16
   5   7   2  230.34   23.71
   5   7   2  210.93   17.62
   5   7   3   57.29   11.39
   5   7   3   59.63    8.70
   5   7   4   13.37    6.60
   5   7   4   15.50    3.98
   5   7   5  316.12   29.15
   5   7   5  320.27   19.01
   5   7   6   82.63   15.17
   5   7   6   76.85   10.03
   5   7   7   76.33   15.50
   5   7   7   58.95    9.52
   5   7   8   49.61   13.55
   5   7   9   55.21   12.96
   5   7  10    8.62    6.30
   5   7  11    3.68    5.97
   5   7  12   95.77   20.85
   5   7  13   -7.08    9.59
   5   7  14   90.60   21.41
   5   7  15   -1.78    4.30
   5   7  16  -24.59   13.06
   5   8  -4   12.61    7.61
   5   8  -3  321.07   34.06
   5   8  -2    0.03    4.08
   5   8  -1    7.96    5.58
   5   8   0  245.58   24.62
   5   8   1  104.32   15.41
   5   8   2   27.43    8.21
   5   8   2   26.99    7.17
   5   8   3  288.15   27.60
   5   8   3  271.62   21.10
   5   8   4   -5.13    5.14
   5   8   4    1.16    2.48
   5   8   5  475.23   36.44
   5   8   5  447.42   26.21
   5   8   6   75.00   14.56
   5   8   6   85.75   11.53
   5   8   7    7.60    5.12
   5   8   7   -0.79    2.72
   5   8   8  109.68   19.17
   5   8   8   85.67   12.93
   5   8   9   39.39   12.29
   5   8  10   -1.09    4.73
   5   8  11  -12.91    9.60
   5   8  12   29.45   11.98
   5   8  13    4.72    4.87
   5   8  14   12.91    8.72
   5   8  15   20.36   11.08
   5   8  16  -13.21    9.78
   5   9  -5   40.58   13.97
   5   9  -4    7.39    6.19
   5   9  -3   34.64   12.48
   5   9  -2   40.64   11.58
   5   9  -1   19.94    8.93
   5   9   0   39.59   10.97
   5   9   1   28.13    8.58
   5   9   2    8.75    5.40
   5   9   2   12.72    4.87
   5   9   3  160.60   21.26
   5   9   3  157.27   18.13
   5   9   4    8.05    5.46
   5   9   4   12.68    5.30
   5   9   5   69.67   14.16
   5   9   5   67.44   11.19
   5   9   6   69.43   14.06
   5   9   6   57.64   10.47
   5   9   7    6.09    4.96
   5   9   7    3.71    3.77
   5   9   8   62.37   14.03
   5   9   8   73.13   12.50
   5   9   9    9.18    6.55
   5   9   9    0.92    2.73
   5   9  10   22.91    9.89
   5   9  11    3.40    7.25
   5   9  12    5.96    5.88
   5   9  13   12.49    7.57
   5   9  14   -1.52    4.35
   5   9  15   -6.52    7.07
   5   9  16    0.15    9.40
   5  10  -5   26.04   13.19
   5  10  -4   10.03    7.37
   5  10  -3   -2.83    6.21
   5  10  -2   10.11    6.26
   5  10  -1    5.05    4.29
   5  10   0    9.60    4.30
   5  10   1   16.99    7.44
   5  10   2    9.34    5.62
   5  10   3   99.43   16.85
   5  10   3  109.32   16.79
   5  10   4    8.16    3.54
   5  10   4   11.03    5.07
   5  10   5   19.54    7.74
   5  10   5    4.91    2.95
   5  10   6  154.37   22.47
   5  10   6  147.51   18.44
   5  10   7   -6.41    5.98
   5  10   7   -6.54    4.14
   5  10   8   23.06   10.02
   5  10   8   44.53   10.24
   5  10   9   10.65    6.70
   5  10   9   -1.04    2.13
   5  10  10    0.41    2.91
   5  10  10   -1.97    3.18
   5  10  11   15.29    9.64
   5  10  11   10.50    6.07
   5  10  12    5.65    5.82
   5  10  13  -12.86    8.54
   5  10  14    8.03    8.12
   5  10  15    2.69    9.77
   5  11  -5   20.93   13.41
   5  11  -4   30.71   14.23
   5  11  -3   24.40   12.81
   5  11  -2   -5.75    4.73
   5  11  -1   33.58   12.18
   5  11   0   10.31    5.24
   5  11   1   -1.87    3.45
   5  11   2   24.21    8.70
   5  11   3   41.78   11.02
   5  11   3   44.08   11.58
   5  11   4   22.42    8.18
   5  11   4   32.16    9.32
   5  11   5   17.89    7.61
   5  11   5   26.76    8.14
   5  11   6    1.44    3.01
   5  11   6    7.42    5.63
   5  11   7    7.58    4.28
   5  11   7    6.09    2.79
   5  11   8   31.81    9.64
   5  11   8   32.66    9.30
   5  11   9   21.48    7.58
   5  11   9    9.23    5.20
   5  11  10   -3.02    5.92
   5  11  10   -0.18    4.25
   5  11  11   62.71   17.52
   5  11  11   38.71   10.68
   5  11  12    3.99    5.08
   5  11  12    6.86    5.58
   5  11  13   24.24    9.83
   5  11  13    5.97    5.12
   5  11  14    6.05    6.40
   5  11  15  -16.75   10.61
   5  12  -5   -3.17    5.50
   5  12  -4   11.14    8.59
   5  12  -3  -10.35    8.02
   5  12  -2   17.70   11.03
   5  12  -1   11.62    8.84
   5  12   0   21.31    8.89
   5  12   1    1.13    3.61
   5  12   2   10.61    6.70
   5  12   3   77.51   16.03
   5  12   4   -1.50    2.90
   5  12   4   -1.89    3.27
   5  12   5   -0.35    5.63
   5  12   5   -0.62    2.25
   5  12   6   40.76   11.91
   5  12   6   58.89   13.50
   5  12   7   12.63    9.43
   5  12   7   10.09    4.40
   5  12   8   35.53   11.35
   5  12   8   15.68    6.18
   5  12   9    8.90    5.48
   5  12   9   17.84    9.42
   5  12  10    5.58    6.49
   5  12  10   13.58    6.82
   5  12  11   40.24   13.43
   5  12  11   44.25   13.08
   5  12  12   14.66   10.49
   5  12  12   17.78    9.56
   5  12  13   -2.30    4.49
   5  12  13    6.53    5.37
   5  12  14   36.72   16.48
   5  12  14   27.52   12.23
   5  12  15    6.84    6.97
   5  13  -4    1.86    7.75
   5  13  -3   28.28   16.14
   5  13  -2   -2.69    4.58
   5  13  -1   17.73   10.03
   5  13   0   16.77    9.50
   5  13   1   20.71    9.62
   5  13   2   38.70   13.37
   5  13   3   26.66   10.21
   5  13   4    0.09    1.90
   5  13   4    0.83    2.94
   5  13   5    5.69    6.45
   5  13   5    2.21    4.13
   5  13   6   10.37    8.01
   5  13   6   22.26    8.82
   5  13   7   10.67    5.24
   5  13   7   13.45    6.19
   5  13   8    1.21    4.62
   5  13   8   -9.26    6.03
   5  13   9    5.34    5.38
   5  13   9   10.77    6.48
   5  13  10  -16.09    8.91
   5  13  10    3.01    3.61
   5  13  11    2.68    5.92
   5  13  11   -7.75    5.57
   5  13  12   17.81    7.62
   5  13  12   10.54    6.72
   5  13  13    0.02    5.74
   5  13  13   -1.97    3.34
   5  13  14   -2.39    4.64
   5  13  14    2.73    3.87
   5  14  -2    4.10    5.80
   5  14  -1    7.00    7.17
   5  14   0   -9.93    7.76
   5  14   1    5.98    2.85
   5  14   2    6.86    6.28
   5  14   3   15.57   10.12
   5  14   4   16.02    8.66
   5  14   5    8.64    7.52
   5  14   5    9.74    6.67
   5  14   6   26.74   10.41
   5  14   6   26.85    9.93
   5  14   7   13.43    8.70
   5  14   7    8.43    6.57
   5  14   8    8.41    6.32
   5  14   8    7.22    7.18
   5  14   9   -0.91    2.96
   5  14   9    7.04    2.79
   5  14  10  -10.80    7.52
   5  14  10    1.50    3.96
   5  14  11    6.49    7.92
   5  14  11    9.51    7.97
   5  14  12    9.21    7.34
   5  14  12    0.13    1.80
   5  14  13   10.82    8.14
   5  14  13    1.73    3.03
   5  14  14   16.89   10.34
   5  15   0  -19.85   11.41
   5  15   1    4.66    5.80
   5  15   2    2.60    4.55
   5  15   3   -1.88    4.04
   5  15   4    8.49    6.07
   5  15   5    8.32    6.81
   5  15   6    4.31    5.01
   5  15   6   20.47   10.73
   5  15   7    2.33    3.43
   5  15   7    3.69    3.92
   5  15   8    8.99    6.55
   5  15   8   -0.83    2.80
   5  15   9   26.92   11.18
   5  15   9   15.86    9.81
   5  15  10   -6.72    6.08
   5  15  10   -3.37    4.51
   5  15  11    0.58    2.99
   5  15  11    0.02    7.80
   5  15  12  -18.35   10.31
   5  15  12    0.15    2.13
   5  15  13    7.85    7.06
   5  16   2    5.94    7.76
   5  16   3    2.30    4.43
   5  16   4   -0.38    2.66
   5  16   5   33.94   15.03
   5  16   6   -5.01    5.56
   5  16   7   -1.91    3.21
   5  16   7    0.25    2.85
   5  16   8   -6.02    5.46
   5  16   8   16.63    9.35
   5  16   9   11.03    7.51
   5  16   9    0.41    2.43
   5  16  10   -0.49    2.49
   5  16  10   -5.91    5.87
   5  16  11   -2.17    3.97
   5  16  11    4.94    5.47
   5  16  12   -7.38    6.74
   5  17   5    5.89    5.80
   5  17   6    3.54    5.27
   5  17   7   -0.25    2.78
   5  17   8   29.41   14.17
   5  17   9   11.01    8.18
   5  17  11   -1.52    3.97
   6  -5 -11    9.94    5.82
   6  -4 -10   -7.65    5.52
   6  -4   6   40.53   11.80
   6  -4   7   -4.03    4.25
   6  -3 -10    1.97    3.85
   6  -3  -9   10.96    7.44
   6  -3  -8   11.48    6.43
   6  -3   5   10.40    6.33
   6  -3   6    9.45    5.78
   6  -3   7   -1.40    4.39
   6  -2 -10    6.70    4.76
   6  -2  -9  139.25   21.34
   6  -2  -8    0.85    3.10
   6  -2  -7   10.09    6.60
   6  -2  -6   25.56    8.94
   6  -2  -5   -1.82    4.36
   6  -2   3   54.95   13.07
   6  -2   4   -4.40    6.21
   6  -2   4    1.27    2.12
   6  -2   5    0.27    2.63
   6  -2   5    2.48    2.73
   6  -2   6  114.80   19.11
   6  -2   7   21.57    7.99
   6  -2   8   11.90    6.27
   6  -1  -9   14.26    6.38
   6  -1  -8   25.46    8.71
   6  -1  -7   88.29   16.32
   6  -1  -6  136.57   19.96
   6  -1  -5    1.80    4.44
   6  -1  -4    7.58    5.31
   6  -1  -3   32.02    8.49
   6  -1  -2   -1.49    4.27
   6  -1  -1   -3.21    4.52
   6  -1   0   54.88   11.65
   6  -1   1   21.56    9.10
   6  -1   2   64.29   13.30
   6  -1   3    0.41    2.84
   6  -1   3    4.06    2.96
   6  -1   4   21.50    8.09
   6  -1   4   26.48    6.81
   6  -1   5    4.30    4.58
   6  -1   5    1.21    1.73
   6  -1   6   82.63   12.74
   6  -1   6   64.83   14.16
   6  -1   7   35.90    9.72
   6  -1   7   37.40    9.35
   6  -1   8   55.05   12.76
   6  -1   8   56.08   12.16
   6   0  -9   52.58   12.72
   6   0  -8    6.71    3.52
   6   0  -7    2.88    3.19
   6   0  -6    7.63    5.80
   6   0  -5    6.62    4.30
   6   0  -4  235.03   25.39
   6   0  -3  755.27   45.63
   6   0  -2   17.44    6.67
   6   0  -1   15.13    6.54
   6   0   0    5.77    3.66
   6   0   1   71.65   13.86
   6   0   2  112.04   17.60
   6   0   2  116.78   13.70
   6   0   3   13.13    6.79
   6   0   3    7.60    3.83
   6   0   4   56.38    9.77
   6   0   4   56.95   12.46
   6   0   5   50.00   11.70
   6   0   5   57.50   10.48
   6   0   6   27.30    8.91
   6   0   6   22.03    7.26
   6   0   7   12.10    6.22
   6   0   7    7.88    4.60
   6   0   8   34.03    9.17
   6   0   8   22.93    7.98
   6   0   9  100.78   17.09
   6   0   9   63.80   13.15
   6   0  10   -2.02    3.07
   6   1  -8    2.33    2.85
   6   1  -7    9.79    5.39
   6   1  -6   30.36    9.16
   6   1  -5   37.43   10.63
   6   1  -4   85.35   14.63
   6   1  -3  329.48   29.36
   6   1  -2   24.34    8.20
   6   1  -1  279.94   27.01
   6   1   0  392.61   31.98
   6   1   1   15.24    5.51
   6   1   2   80.55   12.09
   6   1   2   83.10   14.47
   6   1   3   25.21    7.54
   6   1   3   22.45    6.34
   6   1   3   17.17    4.36
   6   1   4    6.27    5.32
   6   1   4   12.41    5.30
   6   1   4    9.34    3.43
   6   1   5  123.10   18.43
   6   1   5  115.74   15.46
   6   1   6  100.94   15.63
   6   1   6  109.78   17.50
   6   1   7    1.46    4.92
   6   1   7    9.90    5.45
   6   1   8  116.48   18.00
   6   1   8   95.87   16.34
   6   1   9   14.26    6.75
   6   1   9    4.76    2.61
   6   1  10   21.55    7.83
   6   1  11   -5.71    5.17
   6   1  12    0.88    3.13
   6   2  -5    7.54    4.97
   6   2  -4   55.60   12.36
   6   2  -3  570.67   38.93
   6   2  -2  118.46   18.08
   6   2  -1   49.91   11.59
   6   2   0  204.42   22.82
   6   2   1   21.06    8.50
   6   2   2  812.83   45.91
   6   2   2  755.26   37.67
   6   2   3   98.34   14.39
   6   2   3  108.74   17.17
   6   2   4   80.60    8.29
   6   2   4   83.18   13.27
   6   2   4   96.04   16.02
   6   2   5   42.99   10.15
   6   2   5   72.25   14.24
   6   2   5   52.21    7.92
   6   2   6   66.12   13.61
   6   2   6   64.31   13.06
   6   2   6   48.08    8.68
   6   2   7   17.10    7.53
   6   2   7   19.47    7.40
   6   2   8  129.97   19.37
   6   2   9    8.24    4.61
   6   2  10   17.49    9.23
   6   2  11   12.13    7.75
   6   2  12   -3.72    4.80
   6   2  13   -4.20    5.21
   6   2  14   -2.11    3.97
   6   3  -2   -3.37    5.43
   6   3  -1   78.43   14.57
   6   3   0  672.49   42.20
   6   3   1    0.64    3.50
   6   3   2   10.60    4.02
   6   3   2    7.59    4.85
   6   3   3  227.10   24.81
   6   3   3  196.90   20.83
   6   3   4    5.82    4.99
   6   3   4    3.25    1.29
   6   3   4    7.23    2.80
   6   3   5  179.25   21.98
   6   3   5  143.93   18.38
   6   3   5  133.42   10.31
   6   3   6  243.27   25.03
   6   3   6  220.93   16.08
   6   3   7   -3.05    3.67
   6   3   8    2.41    4.54
   6   3   9   35.35   10.93
   6   3  10   -5.29    5.96
   6   3  11   19.35   10.41
   6   3  12    0.24    4.04
   6   3  13   23.86   10.82
   6   3  14    2.47    6.71
   6   3  15   -1.47    4.03
   6   4   1   29.08    8.98
   6   4   2  133.04   17.14
   6   4   3    3.10    3.70
   6   4   4  259.31   24.87
   6   4   5    3.58    2.10
   6   4   5    0.40    0.59
   6   4   6  148.81   11.50
   6   4   6  168.04   21.33
   6   4   7   62.76   13.41
   6   4   7   69.82    9.73
   6   4   8  125.09   20.01
   6   4   9    3.69    5.72
   6   4  10   -4.69    4.85
   6   4  11   -1.13    3.96
   6   4  12    4.93    5.25
   6   4  13   11.36    7.99
   6   4  14   17.08   10.14
   6   4  15    0.03    6.92
   6   4  16   -1.29    4.27
   6   5   2    9.45    5.97
   6   5   3   22.05    6.33
   6   5   4   12.81    6.07
   6   5   5  436.06   34.40
   6   5   6  196.59   23.39
   6   5   6  156.83   10.70
   6   5   7   -0.65    1.84
   6   5   7    1.49    2.85
   6   5   8    0.70    6.16
   6   5   9   35.79   12.04
   6   5  10    4.20    4.46
   6   5  11   79.98   18.94
   6   5  12   47.30   14.62
   6   5  13    1.43    4.80
   6   5  14   -0.02    3.08
   6   5  15  -11.48    8.75
   6   5  16    8.36    8.17
   6   6   2   15.89    5.84
   6   6   3   31.44    8.94
   6   6   3   30.82    6.97
   6   6   4    2.06    3.69
   6   6   5  224.34    9.49
   6   6   5  229.21    9.52
   6   6   6  164.26   10.67
   6   6   6  147.35   10.57
   6   6   7   18.97    4.65
   6   6   7   31.06    9.70
   6   6   8  336.44   33.64
   6   6   8  276.90   20.56
   6   6   9   57.21   14.00
   6   6  10   15.29   10.32
   6   6  11   -5.66    6.28
   6   6  12   27.02   11.40
   6   6  13    8.62    8.52
   6   6  14    7.83    7.53
   6   6  15    4.79    6.16
   6   6  16    4.47    8.50
   6   7   0   19.47    6.45
   6   7   0   26.85    3.78
   6   7   1   11.27    3.74
   6   7   1    3.10    1.92
   6   7   2   34.36    6.29
   6   7   2   19.39    7.22
   6   7   2   23.92    5.09
   6   7   3    6.17    2.33
   6   7   3   -3.29    5.41
   6   7   4    3.62    5.22
   6   7   4    1.44    1.39
   6   7   5  175.24   22.49
   6   7   5  171.59   11.35
   6   7   6  174.95   23.21
   6   7   6  157.87   11.63
   6   7   7   42.88   12.17
   6   7   7   30.64    5.85
   6   7   8   87.58   18.07
   6   7   9   56.25   13.80
   6   7  10    4.58    5.59
   6   7  11  140.09   25.12
   6   7  12   -7.71    7.30
   6   7  13    1.24    8.10
   6   7  14    2.07    7.38
   6   7  15   -2.93    5.24
   6   7  16   -5.50    6.73
   6   8  -2   12.37    6.39
   6   8  -1    1.79    3.36
   6   8   0   28.46    7.86
   6   8   1   20.74    6.53
   6   8   2    4.99    3.13
   6   8   2    6.37    3.99
   6   8   3  119.83   13.08
   6   8   3  128.09   19.14
   6   8   4   45.43   11.25
   6   8   4   45.41    7.65
   6   8   5   88.48   10.04
   6   8   5  113.16   18.44
   6   8   6    6.17    3.78
   6   8   6    6.91    3.28
   6   8   7   15.22    6.59
   6   8   7   19.57    5.05
   6   8   8   50.47   13.37
   6   8   8   26.57    6.58
   6   8   9   48.92   13.40
   6   8  10   12.30    8.96
   6   8  11   25.74   11.53
   6   8  12    0.02    8.65
   6   8  13    5.50    4.90
   6   8  14   26.76   11.22
   6   8  15    3.14    7.55
   6   9  -3   38.03   12.62
   6   9  -2   34.79   11.53
   6   9  -1   22.64    8.26
   6   9   0   82.41   14.71
   6   9   1    9.25    4.92
   6   9   2   46.10    9.93
   6   9   2   37.78   11.42
   6   9   3   76.35   15.40
   6   9   3   87.42   12.89
   6   9   4   -4.21    4.49
   6   9   4    2.56    2.90
   6   9   5   29.94    9.81
   6   9   5   28.86    6.95
   6   9   6   23.56    8.47
   6   9   6   18.53    5.43
   6   9   7   -1.71    6.63
   6   9   7    0.55    2.03
   6   9   8   55.08   14.56
   6   9   8   31.34    7.53
   6   9   9   17.71    9.52
   6   9   9    6.11    2.98
   6   9  10   40.93   12.54
   6   9  10   16.52    6.66
   6   9  11   21.80   10.74
   6   9  12    4.42    4.64
   6   9  13   26.30   12.13
   6   9  14    5.63    6.94
   6   9  15  -25.31   12.79
   6  10  -4   25.50   10.05
   6  10  -3   38.45   12.97
   6  10  -2   -3.25    4.60
   6  10  -1   38.50   10.83
   6  10   0   69.22   14.48
   6  10   1    1.72    3.39
   6  10   2  107.27   16.69
   6  10   3  129.38   17.89
   6  10   3  116.75   19.13
   6  10   4   12.68    2.75
   6  10   4   15.96    5.54
   6  10   5   27.58   10.29
   6  10   5   36.42    8.39
   6  10   6    8.52    6.29
   6  10   6    2.85    3.83
   6  10   7   14.77    8.85
   6  10   7    5.86    3.75
   6  10   8   66.28   16.06
   6  10   8   67.63   11.75
   6  10   9   13.72    7.48
   6  10   9    7.48    4.40
   6  10  10   14.39    6.60
   6  10  10   13.62    4.63
   6  10  11   43.58   14.71
   6  10  11   36.89   10.58
   6  10  12   -5.00    7.29
   6  10  13    9.89    7.90
   6  10  14    5.47    8.17
   6  10  15    0.16    6.71
   6  11  -4   52.46   16.59
   6  11  -3  -12.54    8.23
   6  11  -2    2.71    4.04
   6  11  -1   34.97   10.63
   6  11   0    8.62    6.89
   6  11   1    2.89    5.42
   6  11   2  150.24   20.95
   6  11   3  108.28   18.82
   6  11   3   92.56   16.11
   6  11   4    0.77    3.78
   6  11   4    6.21    5.44
   6  11   5   42.85   11.91
   6  11   5   54.27   11.50
   6  11   6    6.14    2.58
   6  11   6    6.83    3.85
   6  11   7   81.68   17.86
   6  11   7   56.61   11.95
   6  11   8   16.16    8.64
   6  11   8   32.95    9.19
   6  11   9   -7.85    5.31
   6  11   9    2.04    3.01
   6  11  10    5.15    6.20
   6  11  10    1.75    3.11
   6  11  11   29.66   11.53
   6  11  11   29.04    9.78
   6  11  12   21.94   11.79
   6  11  13  -19.70   10.73
   6  11  14   12.13    8.46
   6  11  15  -10.35    8.52
   6  12  -4   29.83   13.59
   6  12  -3   23.19   12.22
   6  12  -2   -2.63    4.25
   6  12  -1    4.30    4.90
   6  12   0   19.42    9.63
   6  12   1   14.26    6.75
   6  12   2   29.09   10.23
   6  12   3    6.93    4.58
   6  12   4   -8.42    5.85
   6  12   4   -0.52    3.22
   6  12   5   -4.98    4.75
   6  12   5    6.56    4.45
   6  12   6   58.80   15.13
   6  12   6   48.31   11.57
   6  12   7   11.62    6.41
   6  12   7    8.83    4.80
   6  12   8   81.91   18.65
   6  12   8   73.32   14.40
   6  12   9   -5.95    5.61
   6  12   9   -2.26    4.06
   6  12  10  -10.68    7.52
   6  12  10    6.49    4.57
   6  12  11   24.55   11.04
   6  12  12   19.24   10.21
   6  12  13    4.70    5.74
   6  12  14   -8.50    7.61
   6  13  -4  -24.78   12.93
   6  13  -3   12.06   10.57
   6  13  -2    1.62    3.92
   6  13  -1   16.52    9.86
   6  13   0   21.71   11.23
   6  13   1   -4.97    3.54
   6  13   2   10.13    8.67
   6  13   3    4.41    5.91
   6  13   4    9.86    6.48
   6  13   4    8.32    6.03
   6  13   5    2.30    3.01
   6  13   5    9.62    5.70
   6  13   6   22.89    9.80
   6  13   6   11.39    6.73
   6  13   7   15.46    6.13
   6  13   7   24.89    9.16
   6  13   8    3.93    4.63
   6  13   8   -7.00    5.10
   6  13   9   57.32   16.51
   6  13   9   26.67    8.87
   6  13  10    7.63    3.12
   6  13  11   13.73    8.23
   6  13  12   14.54    9.31
   6  13  13   31.69   14.38
   6  13  14    8.81    7.84
   6  14  -2    1.77    4.28
   6  14  -1   -0.23    3.08
   6  14   0    6.41    8.63
   6  14   1   -0.56    2.81
   6  14   2   16.49    8.63
   6  14   3   -3.83    4.70
   6  14   4    4.79    4.80
   6  14   5   14.34    6.67
   6  14   5   19.36    8.37
   6  14   6    9.97    6.73
   6  14   6    0.42    2.35
   6  14   7   -0.90    2.65
   6  14   7    6.04    4.16
   6  14   8  -11.73    7.66
   6  14   8    7.58    4.80
   6  14   9    7.65    7.28
   6  14  10   -5.77    5.68
   6  14  11   -2.09    4.09
   6  14  12  -12.16    8.60
   6  14  13   22.87   11.92
   6  15  -1    1.56    3.77
   6  15   0    6.35    8.22
   6  15   1   -2.96    4.48
   6  15   2    0.75    6.47
   6  15   3   -7.49    6.48
   6  15   4   -0.46    2.54
   6  15   5   23.47   10.71
   6  15   6    3.70    4.48
   6  15   6   11.97    7.52
   6  15   7    3.94    4.76
   6  15   8   11.95   10.06
   6  15   9  -18.76    9.79
   6  15  10    9.69    6.79
   6  15  11   -0.51    3.21
   6  15  12    1.89    4.11
   6  15  13    9.15    8.04
   6  16   1   -9.93    8.27
   6  16   2  -18.38   10.78
   6  16   3   -1.33    3.82
   6  16   7   -7.89    6.40
   6  16   8   -7.58    6.39
   6  16   9    2.09    3.80
   6  16  10    5.70    5.97
   6  16  11    5.87    6.27
   6  16  12   -8.74    7.58
   6  17   8    3.08    5.80
   6  17   9   -1.86    3.69
   6  17  10   21.46   10.86
   7  -6 -11   12.64    8.25
   7  -6   5  -10.47    7.36
   7  -5 -11    6.60    5.43
   7  -5 -10  -12.17    7.59
   7  -5   5   -1.63    3.35
   7  -5   6   13.80    8.28
   7  -4 -10    0.70    5.02
   7  -4  -9    1.81    3.37
   7  -4  -8    3.13    3.81
   7  -4   4   -6.79    5.67
   7  -4   5    1.58    3.28
   7  -4   6   36.67   12.94
   7  -3 -10    4.71    4.48
   7  -3  -9   11.24    7.18
   7  -3  -8   23.61    8.97
   7  -3  -7    1.10    4.52
   7  -3  -6    1.57    3.19
   7  -3  -5   -4.61    5.25
   7  -3   3  -13.89    7.54
   7  -3   4    3.57    3.55
   7  -3   5    4.96    4.71
   7  -3   6    0.58    2.47
   7  -3   7   14.80    7.43
   7  -2 -10    5.75    5.68
   7  -2  -9   39.35   11.96
   7  -2  -8    0.91    3.72
   7  -2  -7    4.29    4.32
   7  -2  -6   28.13   10.37
   7  -2  -5   -2.19    3.06
   7  -2  -4   29.43   10.53
   7  -2  -3   -7.13    7.35
   7  -2  -2   42.97   11.44
   7  -2  -1   43.47   12.24
   7  -2   0   47.47   12.71
   7  -2   1  -15.85    7.72
   7  -2   2    6.11    5.26
   7  -2   3    4.81    5.42
   7  -2   4   10.65    6.43
   7  -2   5  100.81   19.41
   7  -2   6    3.01    3.51
   7  -2   7   15.44    8.49
   7  -2   8    7.66    5.84
   7  -1  -9   15.39    6.73
   7  -1  -8   11.68    5.77
   7  -1  -7    2.96    2.39
   7  -1  -6    7.27    4.24
   7  -1  -5   46.87   12.53
   7  -1  -4   35.60   11.04
   7  -1  -3  325.31   32.76
   7  -1  -2  114.83   19.70
   7  -1  -1   -1.31    3.67
   7  -1   0    4.54    4.58
   7  -1   1   79.57   16.58
   7  -1   2  180.20   24.67
   7  -1   3   37.96   11.44
   7  -1   4   16.07    8.12
   7  -1   4   17.04    5.42
   7  -1   5   58.25   10.41
   7  -1   5   43.98   12.20
   7  -1   6    4.05    4.02
   7  -1   7   30.71   10.40
   7  -1   8   82.32   16.96
   7   0  -9   68.31   15.27
   7   0  -8   -4.69    4.38
   7   0  -7   60.93   14.44
   7   0  -6   10.37    6.76
   7   0  -5    6.25    5.68
   7   0  -4   69.02   14.89
   7   0  -3   99.06   18.15
   7   0  -2    2.72    4.85
   7   0  -1  256.69   29.12
   7   0   0  301.21   31.13
   7   0   1    1.33    4.83
   7   0   2   30.56    9.90
   7   0   3    0.20    2.78
   7   0   3   -4.79    5.16
   7   0   4   55.67   13.20
   7   0   4   48.46    9.95
   7   0   5  175.30   19.44
   7   0   5  137.24   21.36
   7   0   6   90.44   17.34
   7   0   6   66.03   12.20
   7   0   7    5.14    3.24
   7   0   7    7.44    4.84
   7   0   8   35.09    9.58
   7   0   8   23.42    8.81
   7   0   9   -5.33    4.53
   7   1  -8    4.52    5.16
   7   1  -7  103.34   18.81
   7   1  -6   48.08   12.84
   7   1  -5    6.57    5.30
   7   1  -4   56.75   13.65
   7   1  -3  197.32   25.12
   7   1  -2   27.74    9.66
   7   1  -1  210.92   25.91
   7   1   0  108.29   18.47
   7   1   1   84.31   16.24
   7   1   2  110.34   18.81
   7   1   3   18.68    7.27
   7   1   3   30.13    7.73
   7   1   4    2.89    2.17
   7   1   4    0.79    2.86
   7   1   4    0.54    0.91
   7   1   5   48.41   12.64
   7   1   5   49.24   10.37
   7   1   6   -2.91    3.06
   7   1   6    0.74    3.43
   7   1   7   31.30    9.17
   7   1   7   31.44   10.20
   7   1   8   19.00    7.75
   7   1   8   16.40    7.54
   7   1   9   -3.93    3.95
   7   1   9   -1.16    3.61
   7   1  10    4.69    4.44
   7   2  -6   29.62   10.05
   7   2  -5   -0.43    4.21
   7   2  -4  107.52   18.83
   7   2  -3   32.88   10.30
   7   2  -2   -0.64    2.98
   7   2  -1  131.50   19.86
   7   2   0  224.80   26.31
   7   2   1   24.47    8.83
   7   2   2  170.53   19.52
   7   2   2  117.23   19.05
   7   2   3   14.96    5.95
   7   2   3   17.33    7.55
   7   2   4   17.44    3.96
   7   2   4   21.82    7.46
   7   2   5  142.08   18.78
   7   2   5  132.25   20.93
   7   2   6    7.76    5.67
   7   2   6    1.86    4.10
   7   2   7    0.51    2.87
   7   2   7    4.60    3.15
   7   2   8    4.33    2.86
   7   2   8   11.63    5.81
   7   2   9   14.21    7.49
   7   2  10   87.96   18.13
   7   2  11    4.12    6.33
   7   2  12   -4.97    5.11
   7   3  -3   18.03    6.80
   7   3  -2  102.89   18.08
   7   3  -1  181.36   23.75
   7   3   0  217.27   26.50
   7   3   1   55.05   13.59
   7   3   2   22.56    9.03
   7   3   2   12.63    5.41
   7   3   3   40.74   10.91
   7   3   3   54.70   11.55
   7   3   4   50.23   13.17
   7   3   4   54.42   11.65
   7   3   5  123.70   18.02
   7   3   5  136.70   21.24
   7   3   5  105.21    8.58
   7   3   6   -1.72    2.92
   7   3   6   -4.67    3.96
   7   3   7   29.89    9.18
   7   3   8   87.00   17.09
   7   3   9   31.40   10.83
   7   3  10   11.74    7.99
   7   3  11   61.37   16.40
   7   3  12    3.20    4.28
   7   3  13   20.08   10.88
   7   3  14    5.73    5.97
   7   4   2   79.03   14.19
   7   4   3   32.78    9.41
   7   4   4   33.19    9.03
   7   4   5   52.37   12.52
   7   4   6   73.02   14.53
   7   4   7   64.08   14.05
   7   4   8   63.12   14.81
   7   4   9   -2.12    3.42
   7   4  10   30.27   11.30
   7   4  11   53.25   15.48
   7   4  12   -6.00    5.66
   7   4  13    5.23    3.68
   7   4  14  -12.82    8.60
   7   4  15  -11.98    8.75
   7   5   2   96.24   16.03
   7   5   3    1.74    2.95
   7   5   4   44.98   11.22
   7   5   5   56.14   12.65
   7   5   6   55.46   12.89
   7   5   7   12.24    5.62
   7   5   8   87.62   17.42
   7   5   9   35.73   11.11
   7   5  10    9.38    4.12
   7   5  11   56.28   15.94
   7   5  12   13.09    9.97
   7   5  13    3.71    4.80
   7   5  14   12.82    9.15
   7   5  15  -12.46    9.08
   7   6   2  200.13   23.51
   7   6   3   80.53   15.42
   7   6   4    7.71    4.37
   7   6   5  147.87   21.10
   7   6   6   36.67   10.36
   7   6   7   95.81   18.38
   7   6   7   66.66    6.31
   7   6   8   10.19    7.21
   7   6   9   58.03   15.58
   7   6  10    6.93    3.34
   7   6  11    8.59    6.45
   7   6  12    2.17    6.72
   7   6  13    5.66    5.88
   7   6  14   -0.86    3.44
   7   6  15   -5.10    6.23
   7   7   2  137.67   19.83
   7   7   3   46.04   11.93
   7   7   4   22.56    7.18
   7   7   5  104.55   17.82
   7   7   6   -1.63    6.18
   7   7   7   17.87    8.30
   7   7   8   20.21    9.64
   7   7   9    3.76    4.55
   7   7  10   14.53    8.01
   7   7  11    5.55    7.74
   7   7  12    2.84    4.63
   7   7  13   16.61    9.52
   7   7  14   13.69    9.57
   7   7  15   -5.26    6.33
   7   8   2   58.04    8.98
   7   8   2   73.82   15.39
   7   8   3   23.89    4.88
   7   8   3   20.05    8.02
   7   8   4   18.19    3.75
   7   8   4   21.37    8.20
   7   8   5   90.48    7.47
   7   8   5   91.72   17.05
   7   8   6   13.93    5.76
   7   8   6   12.74    2.59
   7   8   7   67.98   15.56
   7   8   8   20.30    8.26
   7   8   9   32.52   12.35
   7   8  10   33.09   12.87
   7   8  11    9.35    6.27
   7   8  12   20.31   10.45
   7   8  13   46.12   16.31
   7   8  14    3.68    3.48
   7   8  15    5.89    4.71
   7   9   0   -2.12    4.79
   7   9   1   42.58    9.50
   7   9   2   46.91    9.69
   7   9   3   14.32    5.11
   7   9   3    5.68    3.84
   7   9   4  110.08   11.97
   7   9   4  119.85   20.05
   7   9   5   17.74    8.08
   7   9   5   23.73    5.06
   7   9   6    2.15    4.70
   7   9   6   -2.13    2.20
   7   9   7   35.87   11.05
   7   9   8  101.70   19.91
   7   9   9   -8.88    6.54
   7   9  10   85.36   20.71
   7   9  11   91.59   21.18
   7   9  12    2.06    7.39
   7   9  13    1.45    6.54
   7   9  14    8.35    7.39
   7   9  15    3.59    5.55
   7  10  -2   -3.67    4.14
   7  10  -1   13.66    6.51
   7  10   0    1.39    3.42
   7  10   1   23.44    7.96
   7  10   2   39.40    9.39
   7  10   3    0.05    4.28
   7  10   3   -3.21    3.77
   7  10   4   17.15    5.73
   7  10   4   19.83    7.56
   7  10   5    5.78    6.27
   7  10   5    5.09    3.04
   7  10   6   -5.46    5.41
   7  10   7    3.12    4.47
   7  10   8   29.27   10.62
   7  10   9    8.74    2.87
   7  10  10   75.53   19.30
   7  10  11   86.18   20.69
   7  10  12    0.02    5.99
   7  10  13    9.18    7.97
   7  10  14   16.13   11.30
   7  10  15    4.69    6.14
   7  11  -2   -2.00    3.56
   7  11  -1   11.99    8.04
   7  11   0   12.87    6.64
   7  11   1    1.22    2.57
   7  11   2   17.01    6.69
   7  11   3    2.45    2.90
   7  11   4   30.44    8.36
   7  11   4   27.41    9.59
   7  11   5    8.01    5.80
   7  11   5   17.44    6.38
   7  11   6   10.38    6.84
   7  11   7  -11.60    7.25
   7  11   8    2.07    2.99
   7  11   9   19.29    9.15
   7  11  10   23.60   10.82
   7  11  11   24.73   11.65
   7  11  12    2.15    5.61
   7  11  13   18.93    7.33
   7  11  14   -0.03    5.34
   7  12  -3   11.84    9.35
   7  12  -2    6.08    5.81
   7  12  -1   18.84    9.27
   7  12   0   19.40    7.71
   7  12   1    3.25    3.90
   7  12   2   25.55    9.33
   7  12   3    5.18    4.36
   7  12   4    5.36    3.63
   7  12   4   15.55    7.86
   7  12   5    7.15    5.46
   7  12   6    5.90    2.95
   7  12   7   -2.99    4.91
   7  12   8   38.49   13.73
   7  12   9    3.31    4.91
   7  12  10   10.78    7.66
   7  12  11   -7.97    6.91
   7  12  12   -1.41    3.84
   7  12  13    1.28    5.11
   7  12  14   12.85    9.42
   7  13  -3    4.19    5.49
   7  13  -2   -6.44    6.45
   7  13  -1   27.72   11.85
   7  13   0    5.36    5.35
   7  13   1   11.89    7.88
   7  13   2   15.73    7.35
   7  13   5   21.96    8.84
   7  13   6    1.32    3.55
   7  13   7   41.35   12.94
   7  13   8    8.19    6.54
   7  13   9    3.23    4.74
   7  13  10   43.78   15.37
   7  13  11    2.65    3.44
   7  13  12    2.42    6.29
   7  13  13   14.37   11.68
   7  14   5   22.97   11.15
   7  14   6    4.51    4.97
   7  14   7    8.65    5.22
   7  14   8   27.69   12.44
   7  14   9    5.52    5.83
   7  14  10   58.05   17.89
   7  14  11   -0.02    7.05
   7  14  12   -3.10    5.16
   7  14  13    6.82    7.15
   7  15   6   12.86    8.04
   7  15   7   -5.87    5.63
   7  15   8   -5.81    5.77
   7  15   9  -14.90    9.12
   7  15  10   20.43   11.13
   7  15  11   -0.03    7.11
   7  15  12    8.35    7.52
   7  16   7   -7.26    6.37
   7  16   8   21.51   10.78
   7  16   9   -0.62    2.74
   7  16  10   15.28    8.58
   7  16  11   11.00    8.35
   7  17   7   -0.28    2.49
   7  17   8    8.38    8.20
   7  17   9    5.81    5.93
   8  -6 -11    8.06    9.82
   8  -6 -10  -19.73   10.60
   8  -6  -9   -1.35    3.59
   8  -6   4   -1.26    3.16
   8  -6   5   -6.61    6.31
   8  -5 -10   -4.48    5.34
   8  -5  -9   21.27    9.96
   8  -5  -8    9.02    7.08
   8  -5  -7   11.59    8.36
   8  -5   3    0.02    5.02
   8  -5   4   -3.53    4.80
   8  -5   5    0.35    2.23
   8  -5   6   -0.26    2.17
   8  -4 -10    5.21    6.67
   8  -4  -9    0.78    5.82
   8  -4  -8   -7.02    6.16
   8  -4  -7   12.76    7.99
   8  -4  -6   11.04    6.34
   8  -4  -5   15.50    8.10
   8  -4   1   35.46   13.49
   8  -4   2   18.69    9.57
   8  -4   3    0.40    5.03
   8  -4   4  -10.23    7.39
   8  -4   5    9.57    7.12
   8  -4   6    1.57    3.34
   8  -3 -10   11.81    7.50
   8  -3  -9   16.55    9.17
   8  -3  -8    6.62    5.80
   8  -3  -7    8.48    6.20
   8  -3  -6    0.20    2.49
   8  -3  -5   32.43   11.34
   8  -3  -4   24.68    9.68
   8  -3  -3   30.25   12.01
   8  -3  -2   -3.27    6.53
   8  -3  -1   55.24   14.96
   8  -3   0   -2.13    3.72
   8  -3   1   46.25   14.98
   8  -3   2   61.57   17.55
   8  -3   3    4.58    5.07
   8  -3   4    6.60    4.95
   8  -3   5    6.81    5.29
   8  -3   6  -10.44    7.19
   8  -3   7   -6.07    5.60
   8  -2  -9    3.28    4.16
   8  -2  -8  -10.45    6.96
   8  -2  -7   30.75   11.20
   8  -2  -6    5.73    5.28
   8  -2  -5   25.46    9.15
   8  -2  -4    4.69    6.06
   8  -2  -3   -5.84    4.56
   8  -2  -2   30.90   11.10
   8  -2  -1  118.03   22.23
   8  -2   0   14.68    8.09
   8  -2   1   22.63   11.11
   8  -2   2   11.20    7.37
   8  -2   3   -0.53    2.59
   8  -2   4   44.42   14.12
   8  -2   5   63.51   17.74
   8  -2   6   14.07    8.41
   8  -2   7   -1.44    3.18
   8  -1  -9   -7.64    5.87
   8  -1  -8    6.16    4.84
   8  -1  -7    2.74    4.31
   8  -1  -6    1.78    3.09
   8  -1  -5   33.89   11.93
   8  -1  -4   17.66    8.01
   8  -1  -3    6.57    5.79
   8  -1  -2   69.50   16.43
   8  -1  -1   11.77    6.98
   8  -1   0   -3.34    6.84
   8  -1   1   16.58    7.72
   8  -1   2   21.97    9.75
   8  -1   3   -1.54    5.59
   8  -1   4   39.64   13.01
   8  -1   5   42.87   12.47
   8  -1   6   -1.68    3.15
   8  -1   7   10.46    7.09
   8  -1   8    6.00    5.85
   8   0  -9   10.63    6.78
   8   0  -8    9.62    6.63
   8   0  -7  123.05   22.60
   8   0  -6    0.52    3.08
   8   0  -5    1.85    3.61
   8   0  -4    4.91    7.43
   8   0  -3   -6.87    5.69
   8   0  -2    7.21    4.98
   8   0  -1   32.49   10.99
   8   0   0    5.28    3.93
   8   0   1   29.24   11.03
   8   0   2   25.94   10.32
   8   0   3    7.22    5.11
   8   0   4   28.90   10.49
   8   0   4   38.92    9.43
   8   0   5  124.48   16.90
   8   0   5  149.14   24.32
   8   0   6    4.47    2.62
   8   0   7    0.02    1.88
   8   0   8    6.23    5.31
   8   1  -8   -4.01    4.34
   8   1  -7   27.61   10.41
   8   1  -6   19.70    9.34
   8   1  -5    3.72    3.94
   8   1  -4   45.96   13.30
   8   1  -3   26.49    9.22
   8   1  -2   10.31    7.46
   8   1  -1    6.17    3.42
   8   1   0    3.05    4.71
   8   1   1   25.98    9.25
   8   1   2    4.01    5.84
   8   1   3    3.22    5.54
   8   1   4   64.03   15.65
   8   1   4   60.44   12.44
   8   1   5   -3.55    4.11
   8   1   5    0.61    2.71
   8   1   6   41.09   10.22
   8   1   6   29.87   11.89
   8   1   7    4.02    3.69
   8   1   7    4.18    2.28
   8   1   8   20.09   10.16
   8   1   8   27.92    9.29
   8   1   9   -5.10    4.86
   8   2  -6   16.67    8.61
   8   2  -5   14.77    7.89
   8   2  -4   33.83   11.62
   8   2  -3   -1.66    5.27
   8   2  -2   52.79   14.04
   8   2  -1  161.05   24.11
   8   2   0   74.50   16.39
   8   2   1   21.04    8.79
   8   2   2   25.18    9.42
   8   2   3   -0.34    2.17
   8   2   3    2.13    4.26
   8   2   4  205.42   27.88
   8   2   4  200.54   22.82
   8   2   5   41.07   12.30
   8   2   5   56.74   12.41
   8   2   6    6.86    4.63
   8   2   6    9.10    5.26
   8   2   7   16.60    8.89
   8   2   7   23.97    7.70
   8   2   8   -6.60    4.67
   8   2   8   -3.74    5.18
   8   2   9   12.30    5.24
   8   2  10    9.68    4.75
   8   3  -4   46.76   13.03
   8   3  -3   25.51   10.51
   8   3  -2   33.64   11.21
   8   3  -1   99.55   18.66
   8   3   0    6.47    4.23
   8   3   1  256.01   30.62
   8   3   2  188.81   26.61
   8   3   3  139.44   19.18
   8   3   3  142.04   23.02
   8   3   4    7.83    6.86
   8   3   4   -4.73    4.52
   8   3   5   34.51   11.68
   8   3   5   57.41   12.75
   8   3   6   45.91   14.05
   8   3   6   54.07   12.51
   8   3   7  172.73   23.95
   8   3   8  111.13   19.26
   8   3   9    7.10    4.45
   8   3  10    5.80    5.21
   8   3  11   -5.77    5.36
   8   3  12   20.65    9.59
   8   4   3   26.27    8.80
   8   4   4  344.79   32.09
   8   4   5   17.48    6.73
   8   4   6    7.12    6.85
   8   4   7   44.36   12.27
   8   4   8   10.32    5.56
   8   4   9   -2.67    4.39
   8   4  10   33.63   12.34
   8   4  11   11.22    8.25
   8   4  12    6.08    7.83
   8   4  13    7.03    6.34
   8   4  14    7.73    6.86
   8   5   3   50.10   12.22
   8   5   4   -3.43    2.32
   8   5   5   48.48   12.35
   8   5   6   25.00    9.47
   8   5   7  143.13   22.37
   8   5   8   20.71    9.60
   8   5   9   -4.70    5.76
   8   5  10   12.57    7.02
   8   5  11    5.57    4.85
   8   5  12   24.16   12.62
   8   5  13   19.89    9.91
   8   5  14   11.18    8.29
   8   5  15    1.29    3.60
   8   6   3    9.75    5.19
   8   6   4   44.11   11.94
   8   6   5   19.26    7.67
   8   6   6    9.67    7.75
   8   6   7   -7.57    7.54
   8   6   8    3.30    5.54
   8   6   9   -2.68    2.99
   8   6  10   21.17    8.81
   8   6  11    9.05    6.34
   8   6  12   -1.08    3.16
   8   6  13   26.19   14.36
   8   6  14    1.25    3.58
   8   6  15   17.66   10.65
   8   7   3    9.22    5.47
   8   7   4  137.99   21.85
   8   7   5   55.03   13.05
   8   7   6   73.28   16.66
   8   7   7   17.58    8.26
   8   7   8    9.99    7.47
   8   7   9   -4.56    5.04
   8   7  10    3.45    4.54
   8   7  11   15.38    7.50
   8   7  12   36.15   14.11
   8   7  13    1.89    2.86
   8   7  14   -5.03    6.15
   8   7  15   17.69   10.78
   8   8   3    9.94    5.43
   8   8   4  122.72   20.74
   8   8   5   55.26   13.10
   8   8   6   61.69   15.07
   8   8   7   37.31   12.10
   8   8   8   10.65    8.58
   8   8   9   -8.16    7.59
   8   8  10   85.82   20.07
   8   8  11    3.55    4.06
   8   8  12    5.75    6.08
   8   8  13   11.64    9.40
   8   8  14   19.68   11.10
   8   9   3   19.89    8.76
   8   9   4  282.14   32.55
   8   9   5   58.13   14.69
   8   9   6   19.87    9.48
   8   9   7   11.36    7.34
   8   9   8   -6.07    7.03
   8   9   9   24.17    9.81
   8   9  10   82.59   18.97
   8   9  11  -20.95   10.63
   8   9  12    7.85    6.89
   8   9  13    7.40    6.94
   8   9  14   -1.16    4.05
   8  10   4   45.20   13.23
   8  10   5   32.20   11.60
   8  10   6   -3.18    6.71
   8  10   7   11.62    7.70
   8  10   8   24.23   10.62
   8  10   9    0.88    3.18
   8  10  10   28.61   11.21
   8  10  11   12.17    7.87
   8  10  12   -5.32    5.03
   8  10  13   -6.64    6.91
   8  10  14    4.30    3.83
   8  11   4   39.06   12.84
   8  11   5    0.54    2.63
   8  11   6    1.42    2.94
   8  11   7    7.94    7.02
   8  11   8   14.01    8.84
   8  11   9    7.08    6.19
   8  11  10   23.33   11.61
   8  11  11   -8.70    7.19
   8  11  12    5.53    7.04
   8  11  13    1.71    3.46
   8  11  14    2.15    5.75
   8  12   4   23.51   10.02
   8  12   5    6.79    7.75
   8  12   6   24.37   10.39
   8  12   7    1.22    4.51
   8  12   8   12.48    8.03
   8  12   9   13.02    8.50
   8  12  10    4.42    5.04
   8  12  11   -8.19    7.26
   8  12  12   -3.90    5.59
   8  12  13    5.69    5.37
   8  13   5    0.56    3.52
   8  13   6  -12.70    8.05
   8  13   7    2.95    4.37
   8  13   8    0.35    2.47
   8  13   9    6.20    6.11
   8  13  10   -4.40    5.38
   8  13  11    0.08    2.31
   8  13  12    6.30    8.38
   8  13  13   -3.37    6.16
   8  14   5   20.22   10.69
   8  14   6   13.44    8.34
   8  14   7    4.39    3.78
   8  14   8   -8.25    6.85
   8  14   9   -0.02    3.42
   8  14  10   19.66    9.66
   8  14  11   -5.63    6.25
   8  14  12   -6.31    6.84
   8  15   6   -5.39    5.66
   8  15   7   -0.09    2.38
   8  15   8   -6.76    6.60
   8  15   9   14.18    9.15
   8  15  10    3.30    5.06
   8  15  11    6.66    6.66
   8  16   7    8.90    8.03
   8  16   8   19.25   10.52
   8  16   9  -22.20   11.52
   9  -5 -10    9.60    7.78
   9  -5  -9    7.09    6.71
   9  -5  -8    6.38    6.51
   9  -5  -7    8.74    7.35
   9  -5  -6   -3.57    5.07
   9  -5  -5  -17.37   10.17
   9  -5  -4   -1.61    3.77
   9  -5  -3   10.92    8.96
   9  -5  -2    4.25    5.55
   9  -5  -1   32.31   12.48
   9  -5   0    4.86    7.11
   9  -5   1    7.53    9.15
   9  -5   2   -0.03    5.67
   9  -5   3    3.83    5.26
   9  -5   4   13.45   10.90
   9  -4 -10   -8.51    7.12
   9  -4  -9    7.91    9.31
   9  -4  -8   -0.74    2.74
   9  -4  -7   17.96   10.11
   9  -4  -6   12.96    8.59
   9  -4  -5   30.11   12.25
   9  -4  -4   29.50   12.92
   9  -4  -3    7.41    6.77
   9  -4  -2    4.23    5.21
   9  -4  -1    2.22    4.06
   9  -4   0   -7.47    6.85
   9  -4   1   17.04   10.93
   9  -4   2   11.44    9.04
   9  -4   3    0.37    2.82
   9  -4   4   -9.18    7.39
   9  -4   5   -8.77    7.23
   9  -4   6    9.18    8.83
   9  -3  -9    3.03    4.59
   9  -3  -8   -1.44    3.52
   9  -3  -7   10.28    7.14
   9  -3  -6   -5.39    5.76
   9  -3  -5   33.41   13.55
   9  -3  -4   27.80   12.70
   9  -3  -3    4.22    3.88
   9  -3  -2   53.50   17.24
   9  -3  -1   70.67   19.65
   9  -3   0    7.05    8.00
   9  -3   1   -6.40    6.06
   9  -3   2   -3.59    4.79
   9  -3   3   10.77    7.78
   9  -3   4   24.95   11.71
   9  -3   5   23.04   11.17
   9  -3   6   -3.46    4.85
   9  -2  -9    0.11    3.25
   9  -2  -8    0.25    2.18
   9  -2  -7   18.80    9.57
   9  -2  -6    1.79    4.98
   9  -2  -5   17.20   10.30
   9  -2  -4   10.74    7.75
   9  -2  -3    1.83    7.52
   9  -2  -2   12.23    7.47
   9  -2  -1   39.46   14.08
   9  -2   0    0.19    4.72
   9  -2   1   29.55   11.86
   9  -2   2   -4.13    5.16
   9  -2   3    0.83    2.87
   9  -2   4    7.62    7.21
   9  -2   5    8.75    5.34
   9  -2   6    3.81    4.52
   9  -2   7   15.36    9.60
   9  -1  -9   -3.02    4.18
   9  -1  -8   12.80    8.51
   9  -1  -7   -0.02    5.56
   9  -1  -6   -4.77    5.14
   9  -1  -5   15.16    7.94
   9  -1  -4   -1.00    3.06
   9  -1  -3    1.83    3.20
   9  -1  -2   18.15    8.56
   9  -1  -1   12.03    6.15
   9  -1   0   12.50    7.37
   9  -1   1   20.88    9.38
   9  -1   2   -9.63    7.04
   9  -1   3    5.72    4.10
   9  -1   4   38.21   14.56
   9  -1   5   24.22   11.46
   9  -1   6    0.77    3.85
   9  -1   7    0.39    6.40
   9  -1   8   12.01    7.85
   9   0  -8    6.02    5.66
   9   0  -7   31.82   12.22
   9   0  -6    5.70    5.55
   9   0  -5   -3.13    4.25
   9   0  -4    1.83    4.05
   9   0  -3   13.52    7.96
   9   0  -2   49.21   15.43
   9   0  -1   -7.86    6.09
   9   0   0   -0.91    3.02
   9   0   1    7.11    5.16
   9   0   2  -14.18    8.26
   9   0   3   -0.42    5.89
   9   0   4   56.37   16.40
   9   0   5   12.47    7.78
   9   0   6   10.34    8.01
   9   0   7    9.43    8.26
   9   0   8    6.06    5.46
   9   1  -8    8.02    6.37
   9   1  -7   11.60    7.29
   9   1  -6    4.11    5.43
   9   1  -5    1.68    4.55
   9   1  -4   16.93    8.11
   9   1  -3   22.89    9.85
   9   1  -2   96.45   20.80
   9   1  -1    4.18    6.21
   9   1   0  115.25   22.53
   9   1   1   78.19   18.49
   9   1   2   17.72    8.21
   9   1   3    8.47    7.62
   9   1   4    8.43    7.69
   9   1   5    2.92    2.89
   9   1   5    5.10    5.60
   9   1   6   26.61   12.12
   9   1   7   26.12   12.59
   9   1   8   11.08    8.45
   9   1   9   -7.66    6.20
   9   2  -6    0.02    4.00
   9   2  -5   16.09    9.01
   9   2  -4   36.67   13.59
   9   2  -3   12.69    8.92
   9   2  -2  105.21   21.57
   9   2  -1   15.70    8.93
   9   2   0  104.27   20.61
   9   2   1   68.04   17.33
   9   2   2   -2.52    3.98
   9   2   3    7.90    6.58
   9   2   4   94.76   20.47
   9   2   4   63.15   13.96
   9   2   5    9.81    6.79
   9   2   5    6.54    5.09
   9   2   6   52.77   16.22
   9   2   6   46.17   12.45
   9   2   7    8.25    5.08
   9   2   7   15.64    6.84
   9   2   8    7.23    6.05
   9   2   8    6.00    4.73
   9   3  -4   43.79   15.03
   9   3  -3    4.42    5.04
   9   3  -2   34.45   13.37
   9   3  -1   16.32    8.73
   9   3   0   41.28   12.87
   9   3   1   13.91    6.78
   9   3   2    8.43    7.17
   9   3   3   18.81    9.50
   9   3   4   20.65    9.92
   9   3   4    7.70    2.84
   9   3   5    4.85    5.06
   9   3   5   29.15    9.54
   9   3   6   46.80   14.33
   9   3   6   69.62   14.27
   9   3   7   70.67   15.55
   9   3   8    5.84    4.48
   9   3   9    7.88    4.95
   9   3  10    1.97    3.42
   9   4   1    0.98    4.07
   9   4   2   13.29    7.10
   9   4   3    6.62    7.04
   9   4   4   98.89   17.84
   9   4   5    6.76    5.02
   9   4   6   13.78    7.45
   9   4   7   49.62   13.43
   9   4   8   12.17    6.62
   9   4   9    3.40    4.21
   9   4  10    7.47    5.99
   9   4  11   -3.48    4.51
   9   4  12   -1.13    3.16
   9   5   3    5.54    5.23
   9   5   4    4.97    2.90
   9   5   5   21.94    9.54
   9   5   6   13.02    7.05
   9   5   7   87.19   18.18
   9   5   8    1.56    3.38
   9   5   9  -16.06    8.37
   9   5  10   15.41    8.35
   9   5  11   -6.66    6.03
   9   5  12    5.81    5.93
   9   5  13    4.43    5.50
   9   5  14   -7.08    6.84
   9   6   3    0.27    5.67
   9   6   4   67.53   15.58
   9   6   5  203.61   26.83
   9   6   6    6.72    5.27
   9   6   7   17.07    7.32
   9   6   8   -4.40    4.66
   9   6   9   22.25    9.27
   9   6  10   75.06   18.21
   9   6  11  -15.31    8.89
   9   6  12    1.02    5.58
   9   6  13    6.18    6.29
   9   6  14   23.26   11.96
   9   7   3   39.31   11.43
   9   7   4   81.89   17.36
   9   7   5    5.41    4.59
   9   7   6   12.22    7.22
   9   7   7   -7.17    8.06
   9   7   8    2.42    3.18
   9   7   9   -1.47    3.43
   9   7  10   37.96   13.44
   9   7  11   12.94    8.35
   9   7  12    7.45    8.50
   9   7  13   25.12   13.58
   9   7  14    5.49    6.16
   9   8   4   86.09   19.20
   9   8   5   10.91    4.72
   9   8   6   29.64   11.03
   9   8   7   -0.60    3.06
   9   8   8   30.29   12.49
   9   8   9   18.36    9.79
   9   8  10   17.16    8.98
   9   8  11    3.89    4.80
   9   8  12  -14.37    9.26
   9   8  13   10.88    8.31
   9   8  14   -0.06    2.87
   9   9   4  107.82   20.76
   9   9   5    3.67    5.84
   9   9   6   69.75   17.31
   9   9   7   -9.58    6.82
   9   9   8   -1.33    6.55
   9   9   9   24.09   10.57
   9   9  10   13.12    8.84
   9   9  11    1.41    4.11
   9   9  12   -6.14    6.43
   9   9  13   12.28    8.83
   9   9  14    6.55    7.11
   9  10   4   50.04   13.71
   9  10   5    0.77    3.51
   9  10   6   36.52   12.27
   9  10   7   14.04    7.41
   9  10   8   -3.36    4.60
   9  10   9   41.42   13.68
   9  10  10  -10.07    7.66
   9  10  11    9.65    7.86
   9  10  12   10.98    8.89
   9  10  13   -1.52    4.15
   9  11   4   20.38    9.55
   9  11   5    8.95    7.34
   9  11   6   11.76    6.00
   9  11   7   20.08    8.84
   9  11   8   12.01    8.87
   9  11   9   24.15   10.49
   9  11  10   -7.79    6.90
   9  11  11    9.77    3.04
   9  11  12   13.41   10.10
   9  11  13   -0.03    3.27
   9  12   5    4.02    4.96
   9  12   6   12.86    8.13
   9  12   7   13.13    6.69
   9  12   8   11.49    8.03
   9  12   9   -0.54    3.02
   9  12  10    5.45    6.71
   9  12  11   -7.91    7.15
   9  12  12    8.53    6.26
   9  13   5   10.00    7.30
   9  13   6   -3.65    4.83
   9  13   7   19.42    9.45
   9  13   8    6.87    6.42
   9  13   9   14.47    8.20
   9  13  10   -0.68    2.93
   9  13  11    3.32    5.01
   9  14   6   -5.17    5.62
   9  14   7   -0.02    2.56
   9  14   8    5.18    5.87
   9  14   9    8.05    8.69
   9  14  10    3.85    5.37
   9  15   6   23.44   11.58
   9  15   7  -12.17    8.56
   9  15   8    1.95    3.98
  10  -4  -5   18.15   10.83
  10  -4  -4   26.00   12.80
  10  -4  -3    7.94    9.04
  10  -4  -2   19.27   11.04
  10  -4  -1   -4.20    5.70
  10  -4   0   11.94   10.06
  10  -3  -9    4.03    8.66
  10  -3  -8    6.16    6.48
  10  -3  -7    0.86    3.19
  10  -3  -6   -7.84    7.14
  10  -3  -5    5.43    6.30
  10  -3  -4   -9.14    7.69
  10  -3  -3    5.35    5.96
  10  -3  -2   37.01   15.04
  10  -3  -1   31.33   15.19
  10  -3   0    5.32    6.10
  10  -3   1   -1.73    4.07
  10  -3   2   -3.39    4.96
  10  -3   3    3.15    8.60
  10  -3   4   21.81   11.67
  10  -3   5   -4.36    5.65
  10  -2  -9    2.30    4.23
  10  -2  -8   -4.42    5.50
  10  -2  -7    8.23    7.04
  10  -2  -6   -4.26    5.29
  10  -2  -5    5.61    3.10
  10  -2  -4    9.89    8.91
  10  -2  -3   -9.10    7.54
  10  -2  -2   -2.65    4.53
  10  -2  -1   -6.62    6.44
  10  -2   0   27.02   12.16
  10  -2   1   41.58   15.43
  10  -2   2    1.16    7.37
  10  -2   3   13.21    8.44
  10  -2   4   -6.63    6.50
  10  -2   5   -3.15    4.65
  10  -2   6    6.61    6.56
  10  -2   7    5.45    6.11
  10  -1  -8    2.08    3.97
  10  -1  -7    5.45    5.76
  10  -1  -6   -8.57    7.06
  10  -1  -5    8.39    6.82
  10  -1  -4   -4.96    5.56
  10  -1  -3    8.80    8.71
  10  -1  -2   65.51   19.14
  10  -1  -1    8.62    5.52
  10  -1   0    8.91    8.47
  10  -1   1    0.43    4.38
  10  -1   2    0.02    3.64
  10  -1   3    7.23    7.43
  10  -1   4   39.13   15.48
  10  -1   5    3.17    3.94
  10  -1   6   -1.84    3.82
  10  -1   7    7.04    7.71
  10   0  -8   -5.03    5.56
  10   0  -7   -8.24    6.96
  10   0  -6    8.65    5.43
  10   0  -5   10.84    7.78
  10   0  -4   13.81    8.70
  10   0  -3   -0.25    5.73
  10   0  -2   10.59    7.23
  10   0  -1    7.36    6.70
  10   0   0   34.19   14.21
  10   0   1   74.24   20.04
  10   0   2   29.72   13.30
  10   0   3    0.99    3.30
  10   0   4    0.12    4.35
  10   0   5  -11.88    8.20
  10   0   6   26.25   12.90
  10   0   7   26.53   12.03
  10   0   8    3.09    4.52
  10   1  -8   10.45    7.72
  10   1  -7   -5.59    5.87
  10   1  -6   24.91   11.60
  10   1  -5    0.81    2.86
  10   1  -4    4.70    6.80
  10   1  -3   40.09   14.31
  10   1  -2   27.88   12.20
  10   1  -1    4.26    5.73
  10   1   0   23.00   10.88
  10   1   1    3.44    4.84
  10   1   2   10.84    8.35
  10   1   3    7.94    6.66
  10   1   4   51.26   16.38
  10   1   5   -5.99    6.01
  10   1   6   -2.66    4.46
  10   1   7    2.79    7.23
  10   1   8    1.95    3.77
  10   2  -6    4.56    5.25
  10   2  -5    3.51    3.61
  10   2  -4    1.34    3.55
  10   2  -3   18.16   10.41
  10   2  -2   46.83   15.67
  10   2  -1   -0.02    5.28
  10   2   0   46.36   15.51
  10   2   1    2.89    5.58
  10   2   2  -10.98    7.72
  10   2   3    3.38    3.44
  10   2   4    0.67    7.81
  10   2   5   13.28    7.83
  10   2   5   -0.18    2.74
  10   2   6   20.06   10.90
  10   2   7   22.05   11.22
  10   2   8   -5.45    5.57
  10   3  -4   13.61    7.88
  10   3  -3    1.14    4.03
  10   3  -2    9.34    8.30
  10   3  -1  -13.71    9.60
  10   3   0   27.14   12.55
  10   3   1    8.61    9.01
  10   3   2   -3.58    6.03
  10   3   3  114.27   24.00
  10   3   4   -8.36    6.84
  10   3   5   12.48    8.79
  10   3   5    5.32    4.48
  10   3   6   -3.13    4.70
  10   3   6   10.54    7.15
  10   3   7   -3.98    4.06
  10   4   1    4.27    3.56
  10   4   2   12.82    6.81
  10   4   3   64.46   17.99
  10   4   5   13.14    7.49
  10   4   6    6.66    4.88
  10   4   7   -7.11    5.47
  10   4   8   13.61    7.46
  10   4   9    6.48    5.60
  10   4  10   -8.65    6.43
  10   5   4   25.68    9.66
  10   5   5    0.28    3.60
  10   5   6    4.14    3.66
  10   5   7   10.40    6.15
  10   5   8   59.76   16.39
  10   5   9   23.08    9.34
  10   5  10    2.87    4.85
  10   5  11  -12.12    7.94
  10   5  12    6.82    5.34
  10   6   4    1.10    2.95
  10   6   5   -2.38    6.21
  10   6   6   31.30   11.16
  10   6   7  -14.49    7.93
  10   6   8   20.86    9.56
  10   6   9   35.58   12.47
  10   6  10  -11.44    7.61
  10   6  11   -2.15    3.75
  10   6  12   -3.88    5.13
  10   6  13  -11.36    8.38
  10   7   4   23.13    8.72
  10   7   5    5.41    5.10
  10   7   6    7.72    6.44
  10   7   7   -2.19    4.52
  10   7   8    5.35    6.00
  10   7   9   12.70    8.06
  10   7  10   -2.84    4.44
  10   7  11    0.67    5.33
  10   7  12    3.43    5.01
  10   7  13   -9.66    7.95
  10   8   4   -1.08    4.48
  10   8   5    6.73    7.50
  10   8   6   -3.77    2.64
  10   8   7   -0.40    6.14
  10   8   8   -7.49    6.29
  10   8   9   17.72    9.41
  10   8  10    4.60    5.32
  10   8  11   -7.42    6.66
  10   8  12   -4.80    5.76
  10   8  13   12.74    9.13
  10   9   4    5.31    5.25
  10   9   5    5.65    6.07
  10   9   6   36.84   14.49
  10   9   7   10.04    7.75
  10   9   8    9.67    7.13
  10   9   9   -1.87    3.81
  10   9  10    1.54    4.48
  10   9  11   -6.69    6.46
  10   9  12    1.02    3.93
  10   9  13   -0.80    3.72
  10  10   5   24.51    8.33
  10  10   6    5.53    4.97
  10  10   7   13.39    7.94
  10  10   8    0.09    2.65
  10  10   9   33.95   13.47
  10  10  10    2.23    4.27
  10  10  11    4.91    5.81
  10  10  12   14.19   11.26
  10  11   5    0.31    2.93
  10  11   6    7.16    4.25
  10  11   7   16.37    9.53
  10  11   8    3.80    5.11
  10  11   9   24.48   11.26
  10  11  10   10.31    7.80
  10  11  11    9.79    7.87
  10  11  12    9.31    8.00
  10  12   5    1.09    7.58
  10  12   6    5.44    7.58
  10  12   7   15.91   10.10
  10  12   8    8.96    7.34
  10  12   9    5.74    4.22
  10  12  10   -7.68    7.29
  10  12  11   -1.16    3.86
  10  13   6    6.79    6.51
  10  13   7    1.97    4.33
  10  13   8    7.99    6.95
  10  13   9   20.72   11.17
  10  13  10    7.04    6.89
  10  14   6   10.82    8.24
  10  14   7    7.57    9.52
  11  -1  -7    5.06    6.20
  11  -1  -6   -2.03    4.31
  11  -1  -5   -9.75    8.04
  11  -1  -4    7.72    7.23
  11  -1  -3    7.41    7.16
  11  -1  -2   17.91   12.56
  11  -1  -1   -0.03    4.77
  11  -1   0    2.98    4.86
  11  -1   1    4.69    7.53
  11  -1   2   -0.74    3.31
  11  -1   3    9.27    7.96
  11  -1   4    0.36    3.47
  11   0  -8   -0.03    8.16
  11   0  -7   -9.05    7.72
  11   0  -6    8.23    7.38
  11   0  -5    3.68    5.59
  11   0  -4    0.40    2.76
  11   0  -3    0.48    5.03
  11   0  -2   10.87    9.21
  11   0  -1    1.16    4.88
  11   0   0   16.38   11.97
  11   0   1   22.08   13.18
  11   0   2  -11.25    8.50
  11   0   3   12.61    9.12
  11   0   4    4.62    5.58
  11   0   5    7.16    6.95
  11   0   6   14.38    9.84
  11   0   7   -6.32    6.70
  11   1  -7   10.16    8.29
  11   1  -6   11.00    8.69
  11   1  -5   -2.65    4.67
  11   1  -4  -10.78    8.28
  11   1  -3    3.41    7.62
  11   1  -2    2.30    4.42
  11   1  -1   -1.00    3.37
  11   1   0   -0.03    7.52
  11   1   1    7.15    7.72
  11   1   2   11.81    9.89
  11   1   3   18.61   10.79
  11   1   4   31.40   14.35
  11   1   5  -10.14    8.04
  11   1   6    1.76    3.98
  11   1   7   10.60    9.31
  11   1   8    3.08    4.73
  11   2  -6   18.30   11.67
  11   2  -5   10.20    8.24
  11   2  -4   -0.03    7.27
  11   2  -3   16.62   10.38
  11   2  -2   13.12    8.96
  11   2  -1   11.80    8.38
  11   2   0    8.48    4.90
  11   2   1    8.02    9.69
  11   2   2    3.96    7.19
  11   2   3   -4.46    5.53
  11   2   4   11.52    8.50
  11   2   5    2.39    4.49
  11   2   6    5.44    6.04
  11   2   7    5.89    6.91
  11   2   8    6.73    6.72
  11   3  -3   23.55   12.96
  11   3  -2    7.20    6.78
  11   3  -1    7.63    8.14
  11   3   0   17.82   10.74
  11   3   1   -3.61    5.07
  11   3   2    5.24    9.49
  11   3   3   97.88   24.81
  11   3   4   10.75    8.27
  11   3   5   -7.15    6.94
  11   3   6   -0.97    3.58
  11   4   6   16.53    8.18
  11   4   7    2.07    3.42
  11   5   5   19.45    8.59
  11   5   6  -12.93    7.53
  11   5   7    4.92    4.80
  11   5   8   12.14    8.98
  11   5   9   16.32    8.84
  11   6   5    0.21    2.31
  11   6   6   30.86   11.05
  11   6   7    3.59    4.47
  11   6   8    7.17    5.97
  11   6   9   -1.79    3.60
  11   6  10    0.85    3.87
  11   6  11   -1.97    3.88
  11   7   5   17.08    9.54
  11   7   6   23.66   11.05
  11   7   7    5.32    3.82
  11   7   8    1.39    3.31
  11   7   9   15.94    9.18
  11   7  10   11.49    7.93
  11   7  11   11.95    8.33
  11   7  12   -5.73    6.19
  11   8   5   37.23   12.31
  11   8   6   40.94   14.84
  11   8   7   -6.78    6.11
  11   8   8    1.91    4.54
  11   8   9    7.20    4.49
  11   8  10    5.36    5.77
  11   8  11    7.39    6.72
  11   8  12   11.33    8.46
  11   9   5   16.33    9.70
  11   9   6   -2.60    4.23
  11   9   7   13.70    8.54
  11   9   8    8.03    6.95
  11   9   9   -6.31    6.29
  11   9  10   15.25    9.44
  11   9  11   11.09    8.26
  11  10   5   20.86   10.78
  11  10   6    2.33    4.67
  11  10   7    0.91    3.42
  11  10   8   -5.60    5.88
  11  10   9   -6.31    6.38
  11  10  10    5.94    6.41
  11  10  11   19.59   11.07
  11  11   6   -6.18    6.25
  11  11   7   -4.76    5.63
  11  11   8    2.05    3.98
  11  11   9   -4.06    5.43
  11  11  10    5.46    6.22
  11  12   6    2.39    4.39
  11  12   7   -4.05    5.41
  11  12   8    9.64    8.05
  12   2  -3    2.20    4.35
  12   2  -2   19.82   13.25
  12   2  -1    8.72    7.92
  12   2   0    5.36    8.03
  12   2   1    9.79    9.69
  12   2   2   25.10   13.03
  12   2   3    8.55    5.71
  12   2   4    7.15    7.36
  12   3  -3   14.88    9.50
  12   3  -2   -8.40    7.73
  12   3  -1   11.59    9.40
  12   3   0   -1.01    3.57
  12   3   1  -14.62   10.07
  12   3   2   25.23   12.98
  12   3   3   12.15    9.99
  12   3   4   -8.45    7.80
  12   3   5    3.08    5.18
  12   5   7   -5.31    5.29
  12   6   7    5.53    5.55
  12   6   8   11.08    7.59
  12   6   9   12.04    8.13
  12   7   6   -4.94    5.56
  12   7   7   10.84    5.41
  12   7   8   19.96   11.62
  12   7   9   -0.99    3.18
  12   7  10   -6.69    6.39
  12   7  11  -21.26   11.11
  12   8   6    2.99    4.58
  12   8   7   22.09   10.96
  12   8   8   11.21    7.98
  12   8   9    0.44    3.31
  12   8  10    4.55    5.48
  12   9   6   13.73    8.92
  12   9   7   -6.24    6.16
  12   9   8   -0.15    2.49
  12   9   9   -2.73    4.63
  12  10   6   -3.36    5.11
  12  10   7   11.73    9.06
  12  10   8   17.28   10.15
  13   7   8   -0.76    2.91
   0   0   0    0.00    0.00

TITL LFX38 in P1
REM P1 (#1 in standard setting)
CELL 0.71073  10.033138  12.805049  13.168371  63.4946  80.3680  67.3616
ZERR   26.00   0.000778   0.001085   0.001434   0.0096   0.0077   0.0076
LATT -1
SFAC C H N O
UNIT 26.00 26.00 26.00 26.00
TREF
HKLF 4
END
_computing_structure_solution     'SHELXT 2014/5 (Sheldrick, 2014)'
;
_shelx_hkl_checksum                21128
_olex2_submission_special_instructions  'No special instructions were received'
